# Supplementary material for: Tomosyn affects dense core vesicle composition but not exocytosis in mammalian neurons
Source: eLife journal article supplement (doi:10.7554/elife.85561), 2023-08-29
Supplement: fig3-data1 [file Figure 3_proteomics dataset.xlsx]

## Sheet: legend
Legend
This data table contains the results from statistical analyses, each row describes one protein(group).
The first few columns describe the protein metadata; the protein accessions together with the respective descriptions and gene symbol(s) as listed in the provided fasta file. If no gene symbol is provided in the fasta file for a protein, the 'gene_symbols_or_id' column simply contains the value from 'protein_id'.
The next set of columns describe the results from each contrast (comparison of sample groups).
peptides_used_for_dea' shows the number of peptides that pass the filter rules within some contrast (eg; comparing WT vs DKO, how many peptides for protein P could be used for statistical analysis?).
For the statistical model applied (MSqRob), the log2 foldchange, pvalue and qvalue (adjusted pvalue) are provided.
After the differential expression analysis results, qualitative data shows in how many replicates within each group peptides were identified (MS/MS for DDA, identification confidence < x for DIA).
'count_peptides_detected_within_group_<sample group>' shows how many time a peptide for the protein on this row was detected over all replicates within a group (for each sample, count unique detected peptides, then sum for all replicates within group). So if a protein has 3 peptides in total and there are 4 replicates in a group, this is at most 12.
This is pseudo-count data, intended to be used for qualitative analysis when peptide abundances for a protein are absent in one sample group (or quantified in too few replicates to use for differential expression analysis).
For instance, in a 'WT vs DKO' comparison one should see no (or very few) such peptide detections in the DKO for the target protein and many more in the WT sample group.
Differential Detection:
Compute a z-score for each protein based on the total number of detected peptides per sample group.
To easily prioritize proteins-of-interest, some which may not have sufficient abundance values for differential expression analysis but that do have many more detects in one sample group than the other, we provide a simple score based on identification count data.
This is a simplified approach that is intended to rank proteins for further qualitative analysis, be careful of over-interpretation and keep differences in sample group size (#replicates) and the absolute amount of peptides identified in a sample in mind !
columns that start with 'diff_detect_zscore_contrast:' contain the z-scores for each contrast (only for proteins observed in at least N samples samples in either group, to exclude one-hit-wonders)
Please refer to the online documentation for further details: https://github.com/ftwkoopmans/msdap

## Sheet: statistics
protein_id	accessions	fasta_headers	gene_symbols_or_id	unique_peptides	peptides_used_for_dea_contrast: WT vs DKO	foldchange.log2_msqrob_contrast: WT vs DKO	pvalue_msqrob_contrast: WT vs DKO	qvalue_msqrob_contrast: WT vs DKO	signif_msqrob_contrast: WT vs DKO	count_peptides_detected_within_group__DKO	count_peptides_detected_within_group__WT	count_peptides_quantified_within_group__DKO	count_peptides_quantified_within_group__WT	zscore_count_detect__contrast: WT vs DKO
Q80WW9	Q80WW9	>sp|Q80WW9|DDRGK_MOUSE DDRGK domain-containing protein 1 OS=Mus musculus (Mouse) OX=10090 GN=Ddrgk1 PE=1 SV=2	DDRGK1	4	4	-0.0428741	0.0992333	0.294353	FALSE	20	18	20	18	0.453051
Q3TW96	Q3TW96	>sp|Q3TW96|UAP1L_MOUSE UDP-N-acetylhexosamine pyrophosphorylase-like protein 1 OS=Mus musculus (Mouse) OX=10090 GN=Uap1l1 PE=1 SV=1	UAP1L1	13	13	-0.0289128	0.582896	1	FALSE	64	64	64	64	-0.0442138
Q61026	Q61026	>sp|Q61026|NCOA2_MOUSE Nuclear receptor coactivator 2 OS=Mus musculus (Mouse) OX=10090 GN=Ncoa2 PE=1 SV=3	NCOA2	1	1	0	1	1	FALSE	4	5	4	5	-0.94439
A2A7B5	A2A7B5	>tr|A2A7B5|A2A7B5_MOUSE PR domain-containing 2, with ZNF domain OS=Mus musculus (Mouse) OX=10090 GN=Prdm2 PE=1 SV=1	PRDM2	1	1	0	1	1	FALSE	4	4	4	4	-0.0550395
P0C7N9	P0C7N9	>sp|P0C7N9|PSMG4_MOUSE Proteasome assembly chaperone 4 OS=Mus musculus (Mouse) OX=10090 GN=Psmg4 PE=1 SV=1	PSMG4	2	1	0.231692	0.000394909	0.00358333	FALSE	8	9	8	9	-0.568174
Q9DB43	Q9DB43	>sp|Q9DB43|ZFPL1_MOUSE Zinc finger protein-like 1 OS=Mus musculus (Mouse) OX=10090 GN=Zfpl1 PE=1 SV=1	ZFPL1	3	2	-1.28255e-16	1	1	FALSE	14	13	14	13	0.294162
Q6P549	Q6P549	>sp|Q6P549|SHIP2_MOUSE Phosphatidylinositol 3,4,5-trisphosphate 5-phosphatase 2 OS=Mus musculus (Mouse) OX=10090 GN=Inppl1 PE=1 SV=1	INPPL1	10	7	-1.17905e-19	1	1	FALSE	44	44	44	44	-0.0439022
Q9R1T4	Q9R1T4	>sp|Q9R1T4|SEPT6_MOUSE Septin-6 OS=Mus musculus (Mouse) OX=10090 GN=Septin6 PE=1 SV=4	SEPTIN6	3	3	-0.0290177	0.649298	1	FALSE	15	15	15	15	-0.0447409
P97807	P97807	>sp|P97807|FUMH_MOUSE Fumarate hydratase, mitochondrial OS=Mus musculus (Mouse) OX=10090 GN=Fh PE=1 SV=3	FH	18	18	0.0883539	0.0157407	0.0708764	FALSE	89	90	89	90	-0.0982303
Q9CZW5	Q9CZW5	>sp|Q9CZW5|TOM70_MOUSE Mitochondrial import receptor subunit TOM70 OS=Mus musculus (Mouse) OX=10090 GN=Tomm70 PE=1 SV=2	TOMM70	16	15	0.116655	0.0235776	0.09735	FALSE	78	78	78	78	-0.0443235
Q6PD26	Q6PD26	>sp|Q6PD26|PIGS_MOUSE GPI transamidase component PIG-S OS=Mus musculus (Mouse) OX=10090 GN=Pigs PE=1 SV=3	PIGS	18	16	-1.76595e-15	1	1	FALSE	84	83	84	83	0.0146572
Q9QYX7	Q9QYX7	>sp|Q9QYX7|PCLO_MOUSE Protein piccolo OS=Mus musculus (Mouse) OX=10090 GN=Pclo PE=1 SV=4	PCLO	42	36	-0.0471136	0.249676	0.582255	FALSE	194	190	194	190	0.0579037
Q9D061	Q9D061	>sp|Q9D061|ACBD6_MOUSE Acyl-CoA-binding domain-containing protein 6 OS=Mus musculus (Mouse) OX=10090 GN=Acbd6 PE=1 SV=2	ACBD6	7	7	0	1	1	FALSE	35	33	35	33	0.2383
A2AGT5	A2AGT5	>sp|A2AGT5|CKAP5_MOUSE Cytoskeleton-associated protein 5 OS=Mus musculus (Mouse) OX=10090 GN=Ckap5 PE=1 SV=1	CKAP5	57	47	-0.508595	1.62638e-10	1.1478e-08	TRUE	258	276	258	276	-0.376279
Q60864	Q60864	>sp|Q60864|STIP1_MOUSE Stress-induced-phosphoprotein 1 OS=Mus musculus (Mouse) OX=10090 GN=Stip1 PE=1 SV=1	STIP1	29	28	-3.86107e-17	1	1	FALSE	142	144	142	144	-0.112949
P52795	P52795	>sp|P52795|EFNB1_MOUSE Ephrin-B1 OS=Mus musculus (Mouse) OX=10090 GN=Efnb1 PE=1 SV=1	EFNB1	1	1	0	1	1	FALSE	5	5	5	5	-0.046026
P30999	P30999	>sp|P30999|CTND1_MOUSE Catenin delta-1 OS=Mus musculus (Mouse) OX=10090 GN=Ctnnd1 PE=1 SV=2	CTNND1	19	18	-0.0701565	0.0213747	0.0901095	FALSE	92	90	92	90	0.0624605
E9QAS7	E9QAS7	>tr|E9QAS7|E9QAS7_MOUSE IPPc domain-containing protein OS=Mus musculus (Mouse) OX=10090 GN=Inpp5a PE=1 SV=1	INPP5A	8	7	0	1	1	FALSE	38	37	38	37	0.0841912
Q921M4	Q921M4	>sp|Q921M4|GOGA2_MOUSE Golgin subfamily A member 2 OS=Mus musculus (Mouse) OX=10090 GN=Golga2 PE=1 SV=3	GOLGA2	8	8	0	1	1	FALSE	40	39	40	39	0.0784501
Q8C1B7	Q8C1B7	>sp|Q8C1B7|SEP11_MOUSE Septin-11 OS=Mus musculus (Mouse) OX=10090 GN=Septin11 PE=1 SV=4	SEPTIN11	8	8	-2.03158e-17	1	1	FALSE	40	40	40	40	-0.0442712
E9QAE3	E9QAE3	>tr|E9QAE3|E9QAE3_MOUSE B-TFIID TATA-box-binding protein-associated factor 1 OS=Mus musculus (Mouse) OX=10090 GN=Btaf1 PE=1 SV=1	BTAF1	7	5	3.33199e-19	1	1	FALSE	33	30	33	30	0.411321
Q68FH0	Q68FH0	>sp|Q68FH0|PKP4_MOUSE Plakophilin-4 OS=Mus musculus (Mouse) OX=10090 GN=Pkp4 PE=1 SV=1	PKP4	22	19	-0.129707	6.04886e-16	1.58981e-13	FALSE	99	107	99	107	-0.422486
Q8R3H9	Q8R3H9	>sp|Q8R3H9|TTC4_MOUSE Tetratricopeptide repeat protein 4 OS=Mus musculus (Mouse) OX=10090 GN=Ttc4 PE=1 SV=1	TTC4	3	3	1.18393e-16	1	1	FALSE	15	15	15	15	-0.0447409
Q9Z2D6	Q9Z2D6	>sp|Q9Z2D6|MECP2_MOUSE Methyl-CpG-binding protein 2 OS=Mus musculus (Mouse) OX=10090 GN=Mecp2 PE=1 SV=1	MECP2	18	16	0.048793	0.00344042	0.0209281	FALSE	85	86	85	86	-0.101725
Q91VK4	Q91VK4	>sp|Q91VK4|ITM2C_MOUSE Integral membrane protein 2C OS=Mus musculus (Mouse) OX=10090 GN=Itm2c PE=1 SV=2	ITM2C	9	8	-0.118189	0.0190926	0.0819852	FALSE	42	44	42	44	-0.269021
Q80VC9	Q80VC9	>sp|Q80VC9|CAMP3_MOUSE Calmodulin-regulated spectrin-associated protein 3 OS=Mus musculus (Mouse) OX=10090 GN=Camsap3 PE=1 SV=1	CAMSAP3	12	12	0.111029	0.0324316	0.125288	FALSE	59	59	59	59	-0.0446367
P35822	P35822	>sp|P35822|PTPRK_MOUSE Receptor-type tyrosine-protein phosphatase kappa OS=Mus musculus (Mouse) OX=10090 GN=Ptprk PE=1 SV=1	PTPRK	9	8	-0.0193758	0.368326	0.77552	FALSE	40	41	40	41	-0.160284
Q9R0H0	Q9R0H0	>sp|Q9R0H0|ACOX1_MOUSE Peroxisomal acyl-coenzyme A oxidase 1 OS=Mus musculus (Mouse) OX=10090 GN=Acox1 PE=1 SV=5	ACOX1	20	20	-0.183343	0.000163318	0.0017587	FALSE	96	99	96	99	-0.194793
E9Q1P8	E9Q1P8	>sp|E9Q1P8|I2BP2_MOUSE Interferon regulatory factor 2-binding protein 2 OS=Mus musculus (Mouse) OX=10090 GN=Irf2bp2 PE=1 SV=1	IRF2BP2	4	3	8.29386e-13	0.999996	1	FALSE	18	19	18	19	-0.296034
Q78PY7	Q78PY7	>sp|Q78PY7|SND1_MOUSE Staphylococcal nuclease domain-containing protein 1 OS=Mus musculus (Mouse) OX=10090 GN=Snd1 PE=1 SV=1	SND1	38	35	-4.50523e-17	1	1	FALSE	182	183	182	183	-0.0705402
Q6PAJ1	Q6PAJ1	>sp|Q6PAJ1|BCR_MOUSE Breakpoint cluster region protein OS=Mus musculus (Mouse) OX=10090 GN=Bcr PE=1 SV=3	BCR	15	15	-0.0865615	0.00173131	0.0119974	FALSE	73	73	73	73	-0.0441271
Q80UJ7	Q80UJ7	>sp|Q80UJ7|RB3GP_MOUSE Rab3 GTPase-activating protein catalytic subunit OS=Mus musculus (Mouse) OX=10090 GN=Rab3gap1 PE=1 SV=4	RAB3GAP1	17	14	-0.138699	1.4322e-08	5.68552e-07	FALSE	77	75	77	75	0.083334
G5E8K5	G5E8K5	>sp|G5E8K5|ANK3_MOUSE Ankyrin-3 OS=Mus musculus (Mouse) OX=10090 GN=Ank3 PE=1 SV=1	ANK3	27	26	-0.144399	0.000984132	0.00751609	FALSE	127	129	127	129	-0.11985
Q8C170	Q8C170	>sp|Q8C170|MYO9A_MOUSE Unconventional myosin-IXa OS=Mus musculus (Mouse) OX=10090 GN=Myo9a PE=1 SV=2	MYO9A	5	5	-3.03382e-16	1	1	FALSE	24	24	24	24	-0.0446225
Q91VA7	Q91VA7	>tr|Q91VA7|Q91VA7_MOUSE Isocitrate dehydrogenase [NAD] subunit, mitochondrial OS=Mus musculus (Mouse) OX=10090 GN=Idh3b PE=1 SV=1	IDH3B	22	21	0.142676	0.0180321	0.0787626	FALSE	109	107	109	107	0.04696
Q9CR00	Q9CR00	>sp|Q9CR00|PSMD9_MOUSE 26S proteasome non-ATPase regulatory subunit 9 OS=Mus musculus (Mouse) OX=10090 GN=Psmd9 PE=1 SV=1	PSMD9	8	8	-0.072706	0.000963621	0.00741891	FALSE	40	40	40	40	-0.0442712
A2APV2	A2APV2	>sp|A2APV2|FMNL2_MOUSE Formin-like protein 2 OS=Mus musculus (Mouse) OX=10090 GN=Fmnl2 PE=1 SV=2	FMNL2	13	12	-2.33959e-17	1	1	FALSE	63	61	63	61	0.112009
Q8VCX5	Q8VCX5	>sp|Q8VCX5|MICU1_MOUSE Calcium uptake protein 1, mitochondrial OS=Mus musculus (Mouse) OX=10090 GN=Micu1 PE=1 SV=1	MICU1	6	5	-5.62718e-20	1	1	FALSE	27	28	27	28	-0.219376
P21107	P21107	>sp|P21107|TPM3_MOUSE Tropomyosin alpha-3 chain OS=Mus musculus (Mouse) OX=10090 GN=Tpm3 PE=1 SV=3	TPM3	8	8	-5.93378e-18	1	1	FALSE	40	38	40	38	0.203607
Q9WVE8	Q9WVE8	>sp|Q9WVE8|PACN2_MOUSE Protein kinase C and casein kinase substrate in neurons protein 2 OS=Mus musculus (Mouse) OX=10090 GN=Pacsin2 PE=1 SV=1	PACSIN2	11	10	-0.0759433	0.00154306	0.0109247	FALSE	51	50	51	50	0.052311
Q920N7	Q920N7	>sp|Q920N7|SYT12_MOUSE Synaptotagmin-12 OS=Mus musculus (Mouse) OX=10090 GN=Syt12 PE=1 SV=1	SYT12	5	4	-0.835945	3.26335e-22	2.76369e-19	TRUE	21	25	21	25	-0.871808
O88508	O88508	>sp|O88508|DNM3A_MOUSE DNA (cytosine-5)-methyltransferase 3A OS=Mus musculus (Mouse) OX=10090 GN=Dnmt3a PE=1 SV=2	DNMT3A	18	17	0.136956	0.00145434	0.0103987	FALSE	88	85	88	85	0.125101
Q80TZ3	Q80TZ3	>sp|Q80TZ3|AUXI_MOUSE Putative tyrosine-protein phosphatase auxilin OS=Mus musculus (Mouse) OX=10090 GN=Dnajc6 PE=1 SV=2	DNAJC6	15	13	0.143273	0.0342536	0.130737	FALSE	74	70	74	70	0.226413
Q60931	Q60931	>sp|Q60931|VDAC3_MOUSE Voltage-dependent anion-selective channel protein 3 OS=Mus musculus (Mouse) OX=10090 GN=Vdac3 PE=1 SV=1	VDAC3	10	10	0.134686	0.00270893	0.0172782	FALSE	50	50	50	50	-0.0442122
F8VPU2	F8VPU2	>sp|F8VPU2|FARP1_MOUSE FERM, ARHGEF and pleckstrin domain-containing protein 1 OS=Mus musculus (Mouse) OX=10090 GN=Farp1 PE=1 SV=1	FARP1	24	24	-6.40708e-18	1	1	FALSE	120	118	120	118	0.0382386
Q8CHW4	Q8CHW4	>sp|Q8CHW4|EI2BE_MOUSE Translation initiation factor eIF-2B subunit epsilon OS=Mus musculus (Mouse) OX=10090 GN=Eif2b5 PE=1 SV=1	EIF2B5	8	5	-0.0658325	0.0392285	0.145005	FALSE	37	35	37	35	0.221455
Q6ZQ38	Q6ZQ38	>sp|Q6ZQ38|CAND1_MOUSE Cullin-associated NEDD8-dissociated protein 1 OS=Mus musculus (Mouse) OX=10090 GN=Cand1 PE=1 SV=2	CAND1	37	34	0	1	1	FALSE	176	176	176	176	-0.0444087
Q60520	Q60520	>sp|Q60520|SIN3A_MOUSE Paired amphipathic helix protein Sin3a OS=Mus musculus (Mouse) OX=10090 GN=Sin3a PE=1 SV=3	SIN3A	11	8	1.52508e-17	1	1	FALSE	50	44	50	44	0.570806
P70399	P70399	>sp|P70399|TP53B_MOUSE TP53-binding protein 1 OS=Mus musculus (Mouse) OX=10090 GN=Tp53bp1 PE=1 SV=3	TP53BP1	14	11	-9.30076e-17	1	1	FALSE	63	67	63	67	-0.343331
O54781	O54781	>sp|O54781|SRPK2_MOUSE SRSF protein kinase 2 OS=Mus musculus (Mouse) OX=10090 GN=Srpk2 PE=1 SV=2	SRPK2	13	13	-5.98373e-17	1	1	FALSE	64	62	64	62	0.110407
P17426	P17426	>sp|P17426|AP2A1_MOUSE AP-2 complex subunit alpha-1 OS=Mus musculus (Mouse) OX=10090 GN=Ap2a1 PE=1 SV=1	AP2A1	31	28	2.66863e-18	1	1	FALSE	147	148	147	148	-0.0772687
O35855	O35855	>sp|O35855|BCAT2_MOUSE Branched-chain-amino-acid aminotransferase, mitochondrial OS=Mus musculus (Mouse) OX=10090 GN=Bcat2 PE=1 SV=2	BCAT2	4	4	0.0655441	0.0135349	0.0627894	FALSE	20	19	20	19	0.197977
Q80UG2	Q80UG2	>sp|Q80UG2|PLXA4_MOUSE Plexin-A4 OS=Mus musculus (Mouse) OX=10090 GN=Plxna4 PE=1 SV=3	PLXNA4	39	30	-0.350641	0.0222176	0.0926887	FALSE	167	188	167	188	-0.623466
P62960	P62960	>sp|P62960|YBOX1_MOUSE Y-box-binding protein 1 OS=Mus musculus (Mouse) OX=10090 GN=Ybx1 PE=1 SV=3	YBX1	5	5	0.0780198	0.0446702	0.160526	FALSE	25	24	25	24	0.149422
P97868	P97868	>sp|P97868|RBBP6_MOUSE E3 ubiquitin-protein ligase RBBP6 OS=Mus musculus (Mouse) OX=10090 GN=Rbbp6 PE=1 SV=5	RBBP6	1	1	0	1	1	FALSE	5	5	5	5	-0.046026
Q9WUZ9	Q9WUZ9	>sp|Q9WUZ9|ENTP5_MOUSE Ectonucleoside triphosphate diphosphohydrolase 5 OS=Mus musculus (Mouse) OX=10090 GN=Entpd5 PE=1 SV=1	ENTPD5	7	6	-0.0823719	0.00312979	0.0193317	FALSE	29	33	29	33	-0.661238
P98197	P98197	>sp|P98197|AT11A_MOUSE Probable phospholipid-transporting ATPase IH OS=Mus musculus (Mouse) OX=10090 GN=Atp11a PE=1 SV=1	ATP11A	4	3	0.0649685	0.0735053	0.23455	FALSE	17	19	17	19	-0.566082
P70236	P70236	>sp|P70236|MP2K6_MOUSE Dual specificity mitogen-activated protein kinase kinase 6 OS=Mus musculus (Mouse) OX=10090 GN=Map2k6 PE=1 SV=1	MAP2K6	5	5	0.17957	2.79316e-06	5.72298e-05	FALSE	25	25	25	25	-0.0444446
Q9JKC8	Q9JKC8	>sp|Q9JKC8|AP3M1_MOUSE AP-3 complex subunit mu-1 OS=Mus musculus (Mouse) OX=10090 GN=Ap3m1 PE=1 SV=1	AP3M1	4	4	-1.28495e-17	1	1	FALSE	20	20	20	20	-0.0445575
Q9WTX2	Q9WTX2	>sp|Q9WTX2|PRKRA_MOUSE Interferon-inducible double-stranded RNA-dependent protein kinase activator A OS=Mus musculus (Mouse) OX=10090 GN=Prkra PE=1 SV=1	PRKRA	8	8	0.121753	6.39185e-08	2.12745e-06	FALSE	40	40	40	40	-0.0442712
Q08509	Q08509	>sp|Q08509|EPS8_MOUSE Epidermal growth factor receptor kinase substrate 8 OS=Mus musculus (Mouse) OX=10090 GN=Eps8 PE=1 SV=2	EPS8	14	9	0.0120327	0.457321	0.909629	FALSE	51	57	51	57	-0.585201
P14873	P14873	>sp|P14873|MAP1B_MOUSE Microtubule-associated protein 1B OS=Mus musculus (Mouse) OX=10090 GN=Map1b PE=1 SV=2	MAP1B	70	63	-0.0315981	0.28195	0.636937	FALSE	337	325	337	325	0.134382
Q3ULF4	Q3ULF4	>sp|Q3ULF4|SPG7_MOUSE Paraplegin OS=Mus musculus (Mouse) OX=10090 GN=Spg7 PE=1 SV=1	SPG7	9	8	0.140416	4.63556e-09	2.0834e-07	FALSE	43	43	43	43	-0.0445863
Q3U284	Q3U284	>sp|Q3U284|TM231_MOUSE Transmembrane protein 231 OS=Mus musculus (Mouse) OX=10090 GN=Tmem231 PE=1 SV=1	TMEM231	2	1	0	1	1	FALSE	6	8	6	8	-1.29381
O70133	O70133	>sp|O70133|DHX9_MOUSE ATP-dependent RNA helicase A OS=Mus musculus (Mouse) OX=10090 GN=Dhx9 PE=1 SV=2	DHX9	36	36	0.0833723	0.000986304	0.00752513	FALSE	179	178	179	178	-0.0163958
P28660	P28660	>sp|P28660|NCKP1_MOUSE Nck-associated protein 1 OS=Mus musculus (Mouse) OX=10090 GN=Nckap1 PE=1 SV=2	NCKAP1	45	45	-0.0387262	0.164407	0.427828	FALSE	219	221	219	221	-0.0884939
P37804	P37804	>sp|P37804|TAGL_MOUSE Transgelin OS=Mus musculus (Mouse) OX=10090 GN=Tagln PE=1 SV=3	TAGLN	22	21	-2.24625e-16	1	1	FALSE	108	110	108	110	-0.133875
Q6PHS6	Q6PHS6	>sp|Q6PHS6|SNX13_MOUSE Sorting nexin-13 OS=Mus musculus (Mouse) OX=10090 GN=Snx13 PE=2 SV=1	SNX13	8	5	6.81204e-20	1	1	FALSE	30	36	30	36	-0.918567
Q6ZQ89	Q6ZQ89	>sp|Q6ZQ89|MARH6_MOUSE E3 ubiquitin-protein ligase MARCH6 OS=Mus musculus (Mouse) OX=10090 GN=March6 PE=2 SV=2	MARCH6	1	1	0	1	1	FALSE	4	5	4	5	-0.95557
Q5SWU9	Q5SWU9	>sp|Q5SWU9|ACACA_MOUSE Acetyl-CoA carboxylase 1 OS=Mus musculus (Mouse) OX=10090 GN=Acaca PE=1 SV=1	ACACA	46	31	-0.572216	7.82399e-24	7.4543e-21	TRUE	173	218	173	218	-1.17912
Q9ESV0	Q9ESV0	>sp|Q9ESV0|DDX24_MOUSE ATP-dependent RNA helicase DDX24 OS=Mus musculus (Mouse) OX=10090 GN=Ddx24 PE=1 SV=2	DDX24	2	1	0	1	1	FALSE	9	7	9	7	1.04711
Q8BTI9	Q8BTI9	>sp|Q8BTI9|PK3CB_MOUSE Phosphatidylinositol 4,5-bisphosphate 3-kinase catalytic subunit beta isoform OS=Mus musculus (Mouse) OX=10090 GN=Pik3cb PE=1 SV=2	PIK3CB	9	7	3.1867e-18	1	1	FALSE	36	38	36	38	-0.303144
O70591	O70591	>sp|O70591|PFD2_MOUSE Prefoldin subunit 2 OS=Mus musculus (Mouse) OX=10090 GN=Pfdn2 PE=1 SV=2	PFDN2	6	6	0.011371	0.566628	1	FALSE	28	28	28	28	-0.0404371
Q91YR7	Q91YR7	>sp|Q91YR7|PRP6_MOUSE Pre-mRNA-processing factor 6 OS=Mus musculus (Mouse) OX=10090 GN=Prpf6 PE=1 SV=1	PRPF6	20	16	1.18052e-15	1	1	FALSE	88	86	88	86	0.0701668
Q91WT4	Q91WT4	>sp|Q91WT4|DJC17_MOUSE DnaJ homolog subfamily C member 17 OS=Mus musculus (Mouse) OX=10090 GN=Dnajc17 PE=1 SV=2	DNAJC17	1	1	3.77287e-20	1	1	FALSE	4	5	4	5	-0.947666
P67778	P67778	>sp|P67778|PHB_MOUSE Prohibitin OS=Mus musculus (Mouse) OX=10090 GN=Phb PE=1 SV=1	PHB	15	15	0.081933	0.00147728	0.0105429	FALSE	75	73	75	73	0.0873457
G3X8U3	G3X8U3	>tr|G3X8U3|G3X8U3_MOUSE Queuosine salvage protein OS=Mus musculus (Mouse) OX=10090 GN=2210016F16Rik PE=1 SV=1	2210016F16RIK	4	3	2.06534e-19	1	1	FALSE	18	19	18	19	-0.296036
Q68FG2	Q68FG2	>tr|Q68FG2|Q68FG2_MOUSE Spectrin beta chain OS=Mus musculus (Mouse) OX=10090 GN=Sptbn2 PE=1 SV=1	SPTBN2	55	41	-0.62717	2.35092e-20	1.49323e-17	TRUE	232	265	232	265	-0.698343
Q78JN3;Q9WUR2	Q78JN3;Q9WUR2	>sp|Q78JN3|ECI3_MOUSE Enoyl-CoA delta isomerase 3, peroxisomal OS=Mus musculus (Mouse) OX=10090 GN=Eci3 PE=1 SV=1;>sp|Q9WUR2|ECI2_MOUSE Enoyl-CoA delta isomerase 2, mitochondrial OS=Mus musculus (Mouse) OX=10090 GN=Eci2 PE=1 SV=2	ECI3;ECI2	3	3	-1.06722e-18	1	1	FALSE	15	15	15	15	-0.0447409
Q61768	Q61768	>sp|Q61768|KINH_MOUSE Kinesin-1 heavy chain OS=Mus musculus (Mouse) OX=10090 GN=Kif5b PE=1 SV=3	KIF5B	34	30	-0.0998743	2.88437e-06	5.84698e-05	FALSE	155	159	155	159	-0.169973
P30416	P30416	>sp|P30416|FKBP4_MOUSE Peptidyl-prolyl cis-trans isomerase FKBP4 OS=Mus musculus (Mouse) OX=10090 GN=Fkbp4 PE=1 SV=5	FKBP4	24	23	0	1	1	FALSE	117	117	117	117	-0.0440831
Q91XZ4	Q91XZ4	>sp|Q91XZ4|PCDB6_MOUSE Protocadherin beta-6 OS=Mus musculus (Mouse) OX=10090 GN=Pcdhb6 PE=1 SV=1	PCDHB6	1	1	0	1	1	FALSE	5	5	5	5	-0.046026
Q8CCP0	Q8CCP0	>sp|Q8CCP0|NEMF_MOUSE Nuclear export mediator factor Nemf OS=Mus musculus (Mouse) OX=10090 GN=Nemf PE=1 SV=2	NEMF	8	7	-1.97541e-19	1	1	FALSE	37	35	37	35	0.221354
Q6P6J9	Q6P6J9	>sp|Q6P6J9|TXD15_MOUSE Thioredoxin domain-containing protein 15 OS=Mus musculus (Mouse) OX=10090 GN=Txndc15 PE=1 SV=1	TXNDC15	6	4	1.57979e-18	1	1	FALSE	28	27	28	27	0.129736
Q6EBV9	Q6EBV9	>sp|Q6EBV9|ATG9B_MOUSE Autophagy-related protein 9B OS=Mus musculus (Mouse) OX=10090 GN=Atg9b PE=2 SV=2	ATG9B	1	1	-1.11771e-20	1	1	FALSE	5	5	5	5	-0.046026
P56581	P56581	>sp|P56581|TDG_MOUSE G/T mismatch-specific thymine DNA glycosylase OS=Mus musculus (Mouse) OX=10090 GN=Tdg PE=1 SV=2	TDG	2	2	0.0199222	0.489898	0.957681	FALSE	10	10	10	10	-0.0450912
Q68FD5	Q68FD5	>sp|Q68FD5|CLH1_MOUSE Clathrin heavy chain 1 OS=Mus musculus (Mouse) OX=10090 GN=Cltc PE=1 SV=3	CLTC	91	85	-0.0122568	0.305931	0.673154	FALSE	435	435	435	435	-0.0441386
O55029	O55029	>sp|O55029|COPB2_MOUSE Coatomer subunit beta' OS=Mus musculus (Mouse) OX=10090 GN=Copb2 PE=1 SV=2	COPB2	28	26	-5.98525e-18	1	1	FALSE	137	134	137	134	0.0648175
Q8BJZ4	Q8BJZ4	>sp|Q8BJZ4|RT35_MOUSE 28S ribosomal protein S35, mitochondrial OS=Mus musculus (Mouse) OX=10090 GN=Mrps35 PE=1 SV=2	MRPS35	6	6	0.158793	3.7114e-07	9.52468e-06	FALSE	30	29	30	29	0.116653
Q6A0D4	Q6A0D4	>sp|Q6A0D4|RFTN1_MOUSE Raftlin OS=Mus musculus (Mouse) OX=10090 GN=Rftn1 PE=1 SV=4	RFTN1	5	3	0.0549069	0.0956762	0.287323	FALSE	21	19	21	19	0.429076
Q9CXI0	Q9CXI0	>sp|Q9CXI0|COQ5_MOUSE 2-methoxy-6-polyprenyl-1,4-benzoquinol methylase, mitochondrial OS=Mus musculus (Mouse) OX=10090 GN=Coq5 PE=1 SV=2	COQ5	4	3	3.30496e-18	1	1	FALSE	17	15	17	15	0.538416
Q9JI39	Q9JI39	>sp|Q9JI39|ABCBA_MOUSE ATP-binding cassette sub-family B member 10, mitochondrial OS=Mus musculus (Mouse) OX=10090 GN=Abcb10 PE=1 SV=1	ABCB10	7	4	0.0617759	0.0439095	0.15854	FALSE	33	27	33	27	0.916886
P27546	P27546	>sp|P27546|MAP4_MOUSE Microtubule-associated protein 4 OS=Mus musculus (Mouse) OX=10090 GN=Map4 PE=1 SV=3	MAP4	23	22	-0.352235	7.82865e-21	5.42454e-18	TRUE	108	114	108	114	-0.309014
Q9Z0H8	Q9Z0H8	>sp|Q9Z0H8|CLIP2_MOUSE CAP-Gly domain-containing linker protein 2 OS=Mus musculus (Mouse) OX=10090 GN=Clip2 PE=1 SV=2	CLIP2	34	32	-5.47395e-18	1	1	FALSE	165	164	165	164	-0.0132567
A2AI08	A2AI08	>sp|A2AI08|TPRN_MOUSE Taperin OS=Mus musculus (Mouse) OX=10090 GN=Tprn PE=1 SV=1	TPRN	1	1	0	1	1	FALSE	5	5	5	5	-0.046026
Q6PDS3	Q6PDS3	>sp|Q6PDS3|SARM1_MOUSE NAD(+) hydrolase SARM1 OS=Mus musculus (Mouse) OX=10090 GN=Sarm1 PE=1 SV=1	SARM1	23	19	0.0969398	0.00317933	0.0196217	FALSE	111	105	111	105	0.227129
B2RQC6	B2RQC6	>sp|B2RQC6|PYR1_MOUSE CAD protein OS=Mus musculus (Mouse) OX=10090 GN=Cad PE=1 SV=1	CAD	27	23	-0.281376	2.46262e-06	5.12844e-05	FALSE	120	130	120	130	-0.436559
P62259	P62259	>sp|P62259|1433E_MOUSE 14-3-3 protein epsilon OS=Mus musculus (Mouse) OX=10090 GN=Ywhae PE=1 SV=1	YWHAE	26	25	0	1	1	FALSE	125	128	125	128	-0.159428
Q80ZI6	Q80ZI6	>sp|Q80ZI6|LRSM1_MOUSE E3 ubiquitin-protein ligase LRSAM1 OS=Mus musculus (Mouse) OX=10090 GN=Lrsam1 PE=1 SV=1	LRSAM1	15	15	-0.0143015	0.272311	0.621156	FALSE	72	73	72	73	-0.111833
Q8BTI8	Q8BTI8	>sp|Q8BTI8|SRRM2_MOUSE Serine/arginine repetitive matrix protein 2 OS=Mus musculus (Mouse) OX=10090 GN=Srrm2 PE=1 SV=3	SRRM2	14	12	2.17115e-16	1	1	FALSE	64	64	64	64	-0.0449334
Q71RI9	Q71RI9	>sp|Q71RI9|KAT3_MOUSE Kynurenine--oxoglutarate transaminase 3 OS=Mus musculus (Mouse) OX=10090 GN=Kyat3 PE=1 SV=1	KYAT3	5	4	2.1279e-15	1	1	FALSE	25	23	25	23	0.35103
Q3U2P1	Q3U2P1	>sp|Q3U2P1|SC24A_MOUSE Protein transport protein Sec24A OS=Mus musculus (Mouse) OX=10090 GN=Sec24a PE=1 SV=1	SEC24A	14	12	-0.0231564	0.29674	0.658252	FALSE	65	66	65	66	-0.118461
Q62470	Q62470	>sp|Q62470|ITA3_MOUSE Integrin alpha-3 OS=Mus musculus (Mouse) OX=10090 GN=Itga3 PE=1 SV=1	ITGA3	13	11	-0.114684	0.215346	0.521302	FALSE	60	63	60	63	-0.280835
Q3UVL4	Q3UVL4	>sp|Q3UVL4|VPS51_MOUSE Vacuolar protein sorting-associated protein 51 homolog OS=Mus musculus (Mouse) OX=10090 GN=Vps51 PE=1 SV=2	VPS51	21	20	-0.00867461	0.379888	0.793279	FALSE	103	101	103	101	0.0511102
P47738	P47738	>sp|P47738|ALDH2_MOUSE Aldehyde dehydrogenase, mitochondrial OS=Mus musculus (Mouse) OX=10090 GN=Aldh2 PE=1 SV=1	ALDH2	16	16	5.99929e-17	1	1	FALSE	80	79	80	79	0.0176102
Q63829	Q63829	>sp|Q63829|COMD3_MOUSE COMM domain-containing protein 3 OS=Mus musculus (Mouse) OX=10090 GN=Commd3 PE=1 SV=1	COMMD3	7	4	6.47783e-17	1	1	FALSE	26	26	26	26	-0.0448945
Q6P5U7	Q6P5U7	>sp|Q6P5U7|NWD2_MOUSE NACHT and WD repeat domain-containing protein 2 OS=Mus musculus (Mouse) OX=10090 GN=Nwd2 PE=1 SV=2	NWD2	14	11	-0.256076	1.71691e-05	0.00026437	FALSE	61	67	61	67	-0.500617
Q9D8X2	Q9D8X2	>sp|Q9D8X2|CC124_MOUSE Coiled-coil domain-containing protein 124 OS=Mus musculus (Mouse) OX=10090 GN=Ccdc124 PE=1 SV=1	CCDC124	4	4	-1.87624e-18	1	1	FALSE	20	20	20	20	-0.0445575
P16675	P16675	>sp|P16675|PPGB_MOUSE Lysosomal protective protein OS=Mus musculus (Mouse) OX=10090 GN=Ctsa PE=1 SV=1	CTSA	8	8	-7.78786e-18	1	1	FALSE	40	39	40	39	0.0784501
Q64674	Q64674	>sp|Q64674|SPEE_MOUSE Spermidine synthase OS=Mus musculus (Mouse) OX=10090 GN=Srm PE=1 SV=1	SRM	10	10	-0.0362511	0.0204118	0.0865287	FALSE	49	50	49	50	-0.141691
Q8BK67	Q8BK67	>sp|Q8BK67|RCC2_MOUSE Protein RCC2 OS=Mus musculus (Mouse) OX=10090 GN=Rcc2 PE=1 SV=1	RCC2	5	5	0	1	1	FALSE	24	24	24	24	-0.0436649
Q9JME5	Q9JME5	>sp|Q9JME5|AP3B2_MOUSE AP-3 complex subunit beta-2 OS=Mus musculus (Mouse) OX=10090 GN=Ap3b2 PE=1 SV=2	AP3B2	45	41	-8.44347e-19	1	1	FALSE	212	214	212	214	-0.0898771
Q3TDX8	Q3TDX8	>sp|Q3TDX8|NB5R4_MOUSE Cytochrome b5 reductase 4 OS=Mus musculus (Mouse) OX=10090 GN=Cyb5r4 PE=2 SV=3	CYB5R4	1	1	0	1	1	FALSE	5	5	5	5	-0.046026
P16330	P16330	>sp|P16330|CN37_MOUSE 2',3'-cyclic-nucleotide 3'-phosphodiesterase OS=Mus musculus (Mouse) OX=10090 GN=Cnp PE=1 SV=3	CNP	11	10	-0.0802445	0.130573	0.361507	FALSE	52	52	52	52	-0.0451303
Q810B6	Q810B6	>sp|Q810B6|ANFY1_MOUSE Rabankyrin-5 OS=Mus musculus (Mouse) OX=10090 GN=Ankfy1 PE=1 SV=2	ANKFY1	17	16	-0.0265069	0.321622	0.697608	FALSE	79	79	79	79	-0.0442342
Q91X52	Q91X52	>sp|Q91X52|DCXR_MOUSE L-xylulose reductase OS=Mus musculus (Mouse) OX=10090 GN=Dcxr PE=1 SV=2	DCXR	3	2	0.113129	0.197495	0.487469	FALSE	12	12	12	12	-0.0445217
Q9Z1R2	Q9Z1R2	>sp|Q9Z1R2|BAG6_MOUSE Large proline-rich protein BAG6 OS=Mus musculus (Mouse) OX=10090 GN=Bag6 PE=1 SV=1	BAG6	21	20	0	1	1	FALSE	100	102	100	102	-0.140623
Q64737	Q64737	>sp|Q64737|PUR2_MOUSE Trifunctional purine biosynthetic protein adenosine-3 OS=Mus musculus (Mouse) OX=10090 GN=Gart PE=1 SV=3	GART	18	17	-1.32692e-16	1	1	FALSE	85	87	85	87	-0.159138
Q6PGC1	Q6PGC1	>sp|Q6PGC1|DHX29_MOUSE ATP-dependent RNA helicase DHX29 OS=Mus musculus (Mouse) OX=10090 GN=Dhx29 PE=1 SV=1	DHX29	18	16	-0.0327949	0.0840038	0.259537	FALSE	85	88	85	88	-0.21426
Q6NS60	Q6NS60	>sp|Q6NS60|FBX41_MOUSE F-box only protein 41 OS=Mus musculus (Mouse) OX=10090 GN=Fbxo41 PE=1 SV=3	FBXO41	14	11	0.0116211	0.522336	1	FALSE	62	65	62	65	-0.273123
A2ALS5	A2ALS5	>sp|A2ALS5|RPGP1_MOUSE Rap1 GTPase-activating protein 1 OS=Mus musculus (Mouse) OX=10090 GN=Rap1gap PE=1 SV=2	RAP1GAP	12	10	0	1	1	FALSE	52	53	52	53	-0.134813
Q5ND34	Q5ND34	>sp|Q5ND34|WDR81_MOUSE WD repeat-containing protein 81 OS=Mus musculus (Mouse) OX=10090 GN=Wdr81 PE=1 SV=2	WDR81	8	4	-0.18531	3.80828e-07	9.74051e-06	FALSE	29	31	29	31	-0.3647
O08580	O08580	>sp|O08580|ERR1_MOUSE Steroid hormone receptor ERR1 OS=Mus musculus (Mouse) OX=10090 GN=Esrra PE=1 SV=4	ESRRA	2	2	0	1	1	FALSE	9	10	9	10	-0.520056
Q61249	Q61249	>sp|Q61249|IGBP1_MOUSE Immunoglobulin-binding protein 1 OS=Mus musculus (Mouse) OX=10090 GN=Igbp1 PE=1 SV=1	IGBP1	6	5	-0.0415004	0.206943	0.506524	FALSE	29	27	29	27	0.297498
Q80X90	Q80X90	>sp|Q80X90|FLNB_MOUSE Filamin-B OS=Mus musculus (Mouse) OX=10090 GN=Flnb PE=1 SV=3	FLNB	52	40	-0.464943	0.000301857	0.00289403	TRUE	221	247	221	247	-0.591089
Q8R071	Q8R071	>sp|Q8R071|IP3KA_MOUSE Inositol-trisphosphate 3-kinase A OS=Mus musculus (Mouse) OX=10090 GN=Itpka PE=1 SV=1	ITPKA	9	8	-0.14671	0.0413105	0.151452	FALSE	41	44	41	44	-0.383943
Q9D0K2	Q9D0K2	>sp|Q9D0K2|SCOT1_MOUSE Succinyl-CoA:3-ketoacid coenzyme A transferase 1, mitochondrial OS=Mus musculus (Mouse) OX=10090 GN=Oxct1 PE=1 SV=1	OXCT1	22	22	0.198085	0.000208325	0.00211996	FALSE	110	109	110	109	0.000426046
Q05793	Q05793	>sp|Q05793|PGBM_MOUSE Basement membrane-specific heparan sulfate proteoglycan core protein OS=Mus musculus (Mouse) OX=10090 GN=Hspg2 PE=1 SV=1	HSPG2	17	14	-0.265738	0.00148466	0.0105856	FALSE	76	79	76	79	-0.233052
P47955	P47955	>sp|P47955|RLA1_MOUSE 60S acidic ribosomal protein P1 OS=Mus musculus (Mouse) OX=10090 GN=Rplp1 PE=1 SV=1	RPLP1	1	1	0.0891957	0.0964694	0.288317	FALSE	5	5	5	5	-0.046026
Q9WTM5	Q9WTM5	>sp|Q9WTM5|RUVB2_MOUSE RuvB-like 2 OS=Mus musculus (Mouse) OX=10090 GN=Ruvbl2 PE=1 SV=3	RUVBL2	23	21	-0.0151033	0.371512	0.779527	FALSE	110	109	110	109	0.000499463
Q9CZL5	Q9CZL5	>sp|Q9CZL5|PHS2_MOUSE Pterin-4-alpha-carbinolamine dehydratase 2 OS=Mus musculus (Mouse) OX=10090 GN=Pcbd2 PE=1 SV=2	PCBD2	2	2	0.399846	2.30095e-09	1.13147e-07	TRUE	10	10	10	10	-0.0450912
P46638	P46638	>sp|P46638|RB11B_MOUSE Ras-related protein Rab-11B OS=Mus musculus (Mouse) OX=10090 GN=Rab11b PE=1 SV=3	RAB11B	2	2	0	1	1	FALSE	10	10	10	10	-0.0450912
Q9ESW4	Q9ESW4	>sp|Q9ESW4|AGK_MOUSE Acylglycerol kinase, mitochondrial OS=Mus musculus (Mouse) OX=10090 GN=Agk PE=1 SV=1	AGK	14	13	0.124838	0.0117362	0.0560133	FALSE	70	68	70	68	0.0965145
P80314	P80314	>sp|P80314|TCPB_MOUSE T-complex protein 1 subunit beta OS=Mus musculus (Mouse) OX=10090 GN=Cct2 PE=1 SV=4	CCT2	32	32	-6.02928e-17	1	1	FALSE	158	158	158	158	-0.0441515
Q80XL6	Q80XL6	>sp|Q80XL6|ACD11_MOUSE Acyl-CoA dehydrogenase family member 11 OS=Mus musculus (Mouse) OX=10090 GN=Acad11 PE=1 SV=2	ACAD11	9	8	-0.139059	1.42603e-06	3.20626e-05	FALSE	42	44	42	44	-0.267713
O08599	O08599	>sp|O08599|STXB1_MOUSE Syntaxin-binding protein 1 OS=Mus musculus (Mouse) OX=10090 GN=Stxbp1 PE=1 SV=2	STXBP1	37	36	0.0598021	0.15598	0.411198	FALSE	181	178	181	178	0.0387353
Q9CR57	Q9CR57	>sp|Q9CR57|RL14_MOUSE 60S ribosomal protein L14 OS=Mus musculus (Mouse) OX=10090 GN=Rpl14 PE=1 SV=3	RPL14	4	3	0.125211	0.00153428	0.0108972	FALSE	17	17	17	17	-0.0469161
Q3UKJ7	Q3UKJ7	>sp|Q3UKJ7|SMU1_MOUSE WD40 repeat-containing protein SMU1 OS=Mus musculus (Mouse) OX=10090 GN=Smu1 PE=2 SV=2	SMU1	12	10	0.0280793	0.136032	0.372971	FALSE	55	53	55	53	0.134469
P56959	P56959	>sp|P56959|FUS_MOUSE RNA-binding protein FUS OS=Mus musculus (Mouse) OX=10090 GN=Fus PE=1 SV=1	FUS	9	8	0.0355901	0.234283	0.553879	FALSE	45	43	45	43	0.176082
Q8BYI9	Q8BYI9	>sp|Q8BYI9|TENR_MOUSE Tenascin-R OS=Mus musculus (Mouse) OX=10090 GN=Tnr PE=1 SV=2	TNR	19	19	-1.27396e-18	1	1	FALSE	93	93	93	93	-0.0435041
Q80YS6	Q80YS6	>sp|Q80YS6|AFAP1_MOUSE Actin filament-associated protein 1 OS=Mus musculus (Mouse) OX=10090 GN=Afap1 PE=1 SV=1	AFAP1	7	7	0.0559664	0.0318818	0.123773	FALSE	34	35	34	35	-0.184585
Q9CY00	Q9CY00	>sp|Q9CY00|TT30B_MOUSE Tetratricopeptide repeat protein 30B OS=Mus musculus (Mouse) OX=10090 GN=Ttc30b PE=2 SV=1	TTC30B	6	5	1.40344e-18	1	1	FALSE	27	27	27	27	-0.0443975
Q8BWQ6	Q8BWQ6	>sp|Q8BWQ6|VP35L_MOUSE VPS35 endosomal protein sorting factor-like OS=Mus musculus (Mouse) OX=10090 GN=Vps35l PE=1 SV=2	VPS35L	21	19	-0.0679878	1.65144e-05	0.00025532	FALSE	102	97	102	97	0.200934
Q80VL1	Q80VL1	>sp|Q80VL1|TDRKH_MOUSE Tudor and KH domain-containing protein OS=Mus musculus (Mouse) OX=10090 GN=Tdrkh PE=1 SV=1	TDRKH	12	12	0.136669	0.00019759	0.00202942	FALSE	59	58	59	58	0.040541
A8C756	A8C756	>sp|A8C756|THADA_MOUSE Thyroid adenoma-associated protein homolog OS=Mus musculus (Mouse) OX=10090 GN=Thada PE=1 SV=1	THADA	7	4	0	1	1	FALSE	26	25	26	25	0.142685
Q8CIG8	Q8CIG8	>sp|Q8CIG8|ANM5_MOUSE Protein arginine N-methyltransferase 5 OS=Mus musculus (Mouse) OX=10090 GN=Prmt5 PE=1 SV=3	PRMT5	12	11	0.00759502	0.577008	1	FALSE	60	57	60	57	0.205546
Q6PH08;Q99MI1	Q6PH08;Q99MI1	>sp|Q6PH08|ERC2_MOUSE ERC protein 2 OS=Mus musculus (Mouse) OX=10090 GN=Erc2 PE=1 SV=2;>sp|Q99MI1|RB6I2_MOUSE ELKS/Rab6-interacting/CAST family member 1 OS=Mus musculus (Mouse) OX=10090 GN=Erc1 PE=1 SV=1	ERC2;ERC1	10	10	-0.0110198	0.615319	1	FALSE	49	48	49	48	0.0557251
Q8C7X2	Q8C7X2	>sp|Q8C7X2|EMC1_MOUSE ER membrane protein complex subunit 1 OS=Mus musculus (Mouse) OX=10090 GN=Emc1 PE=1 SV=1	EMC1	23	22	-4.10218e-17	1	1	FALSE	111	112	111	112	-0.0873535
Q6KAR6	Q6KAR6	>sp|Q6KAR6|EXOC3_MOUSE Exocyst complex component 3 OS=Mus musculus (Mouse) OX=10090 GN=Exoc3 PE=1 SV=2	EXOC3	17	14	-0.0212872	0.16986	0.43739	FALSE	76	79	76	79	-0.232509
Q8BP40	Q8BP40	>sp|Q8BP40|PPA6_MOUSE Lysophosphatidic acid phosphatase type 6 OS=Mus musculus (Mouse) OX=10090 GN=Acp6 PE=1 SV=1	ACP6	3	3	-9.55157e-19	1	1	FALSE	15	15	15	15	-0.0447409
O54965	O54965	>sp|O54965|RNF13_MOUSE E3 ubiquitin-protein ligase RNF13 OS=Mus musculus (Mouse) OX=10090 GN=Rnf13 PE=1 SV=2	RNF13	2	2	-0.10351	0.318745	0.693541	FALSE	10	10	10	10	-0.0450912
E9Q6B2	E9Q6B2	>sp|E9Q6B2|CC85C_MOUSE Coiled-coil domain-containing protein 85C OS=Mus musculus (Mouse) OX=10090 GN=Ccdc85c PE=1 SV=1	CCDC85C	1	1	0	1	1	FALSE	5	5	5	5	-0.046026
Q2KN98	Q2KN98	>sp|Q2KN98|CYTSA_MOUSE Cytospin-A OS=Mus musculus (Mouse) OX=10090 GN=Specc1l PE=1 SV=1	SPECC1L	19	15	-0.0617166	0.083635	0.258985	FALSE	90	87	90	87	0.121759
Q8R3P6	Q8R3P6	>sp|Q8R3P6|INT14_MOUSE Integrator complex subunit 14 OS=Mus musculus (Mouse) OX=10090 GN=Ints14 PE=1 SV=1	INTS14	3	2	-2.52187e-16	1	1	FALSE	13	15	13	15	-0.703345
Q62188	Q62188	>sp|Q62188|DPYL3_MOUSE Dihydropyrimidinase-related protein 3 OS=Mus musculus (Mouse) OX=10090 GN=Dpysl3 PE=1 SV=1	DPYSL3	34	31	-1.33209e-15	1	1	FALSE	160	164	160	164	-0.164844
P97427	P97427	>sp|P97427|DPYL1_MOUSE Dihydropyrimidinase-related protein 1 OS=Mus musculus (Mouse) OX=10090 GN=Crmp1 PE=1 SV=1	CRMP1	30	28	0.0512953	0.11583	0.330402	FALSE	143	141	143	141	0.0246256
Q8BYM8	Q8BYM8	>sp|Q8BYM8|SYCM_MOUSE Probable cysteine--tRNA ligase, mitochondrial OS=Mus musculus (Mouse) OX=10090 GN=Cars2 PE=1 SV=2	CARS2	7	7	0.108437	1.07422e-06	2.46619e-05	FALSE	35	35	35	35	-0.0443129
Q4ACU6	Q4ACU6	>sp|Q4ACU6|SHAN3_MOUSE SH3 and multiple ankyrin repeat domains protein 3 OS=Mus musculus (Mouse) OX=10090 GN=Shank3 PE=1 SV=3	SHANK3	14	12	-0.14635	8.92794e-06	0.000149887	FALSE	62	65	62	65	-0.273092
P33173	P33173	>sp|P33173|KIF1A_MOUSE Kinesin-like protein KIF1A OS=Mus musculus (Mouse) OX=10090 GN=Kif1a PE=1 SV=2	KIF1A	31	29	0	1	1	FALSE	149	151	149	151	-0.108396
Q8BWJ3	Q8BWJ3	>sp|Q8BWJ3|KPB2_MOUSE Phosphorylase b kinase regulatory subunit alpha, liver isoform OS=Mus musculus (Mouse) OX=10090 GN=Phka2 PE=1 SV=1	PHKA2	2	2	-0.0415394	0.290724	0.649809	FALSE	10	10	10	10	-0.0450912
Q70IV5	Q70IV5	>sp|Q70IV5|SYNEM_MOUSE Synemin OS=Mus musculus (Mouse) OX=10090 GN=Synm PE=1 SV=2	SYNM	5	2	-0.0919379	0.084894	0.261757	FALSE	15	19	15	19	-1.14641
Q9Z0H4	Q9Z0H4	>sp|Q9Z0H4|CELF2_MOUSE CUGBP Elav-like family member 2 OS=Mus musculus (Mouse) OX=10090 GN=Celf2 PE=1 SV=1	CELF2	9	7	0	1	1	FALSE	40	40	40	40	-0.0438601
P28659	P28659	>sp|P28659|CELF1_MOUSE CUGBP Elav-like family member 1 OS=Mus musculus (Mouse) OX=10090 GN=Celf1 PE=1 SV=2	CELF1	6	6	-2.60523e-20	1	1	FALSE	30	30	30	30	-0.0443681
Q80YR4	Q80YR4	>sp|Q80YR4|ZN598_MOUSE E3 ubiquitin-protein ligase ZNF598 OS=Mus musculus (Mouse) OX=10090 GN=Znf598 PE=1 SV=1	ZNF598	6	6	-1.40114e-18	1	1	FALSE	30	30	30	30	-0.0443681
P58854	P58854	>sp|P58854|GCP3_MOUSE Gamma-tubulin complex component 3 OS=Mus musculus (Mouse) OX=10090 GN=Tubgcp3 PE=1 SV=2	TUBGCP3	11	9	1.22795e-18	1	1	FALSE	51	50	51	50	0.0519694
Q61035	Q61035	>sp|Q61035|SYHC_MOUSE Histidine--tRNA ligase, cytoplasmic OS=Mus musculus (Mouse) OX=10090 GN=Hars PE=1 SV=2	HARS	13	13	0.0358753	0.00741332	0.0386222	FALSE	63	65	63	65	-0.196746
Q9DBR1	Q9DBR1	>sp|Q9DBR1|XRN2_MOUSE 5'-3' exoribonuclease 2 OS=Mus musculus (Mouse) OX=10090 GN=Xrn2 PE=1 SV=1	XRN2	8	7	0.0712535	0.0747354	0.237165	FALSE	40	37	40	37	0.330306
Q03157	Q03157	>sp|Q03157|APLP1_MOUSE Amyloid-like protein 1 OS=Mus musculus (Mouse) OX=10090 GN=Aplp1 PE=1 SV=1	APLP1	5	5	1.56086e-15	1	1	FALSE	24	25	24	25	-0.236575
P84086	P84086	>sp|P84086|CPLX2_MOUSE Complexin-2 OS=Mus musculus (Mouse) OX=10090 GN=Cplx2 PE=1 SV=1	CPLX2	2	2	0.208992	0.0209325	0.0884898	FALSE	10	10	10	10	-0.0450912
Q9WV34	Q9WV34	>sp|Q9WV34|MPP2_MOUSE MAGUK p55 subfamily member 2 OS=Mus musculus (Mouse) OX=10090 GN=Mpp2 PE=1 SV=1	MPP2	20	18	-0.0275784	0.470465	0.928745	FALSE	95	96	95	96	-0.0946053
Q9CYH2	Q9CYH2	>sp|Q9CYH2|PXL2A_MOUSE Peroxiredoxin-like 2A OS=Mus musculus (Mouse) OX=10090 GN=Prxl2a PE=1 SV=2	PRXL2A	12	12	1.69882e-20	1	1	FALSE	59	60	59	60	-0.125536
P07934	P07934	>sp|P07934|PHKG1_MOUSE Phosphorylase b kinase gamma catalytic chain, skeletal muscle/heart isoform OS=Mus musculus (Mouse) OX=10090 GN=Phkg1 PE=1 SV=3	PHKG1	4	4	-0.0782035	0.0159719	0.0716526	FALSE	20	20	20	20	-0.0445575
Q3USH5	Q3USH5	>sp|Q3USH5|SFSWA_MOUSE Splicing factor, suppressor of white-apricot homolog OS=Mus musculus (Mouse) OX=10090 GN=Sfswap PE=1 SV=2	SFSWAP	2	2	-8.63528e-19	1	1	FALSE	9	9	9	9	-0.0439151
Q9QY36	Q9QY36	>sp|Q9QY36|NAA10_MOUSE N-alpha-acetyltransferase 10 OS=Mus musculus (Mouse) OX=10090 GN=Naa10 PE=1 SV=1	NAA10	6	5	0	1	1	FALSE	26	25	26	25	0.139172
Q3UX61	Q3UX61	>sp|Q3UX61|NAA11_MOUSE N-alpha-acetyltransferase 11 OS=Mus musculus (Mouse) OX=10090 GN=Naa11 PE=1 SV=1	NAA11	1	1	0	1	1	FALSE	5	5	5	5	-0.046026
Q6NSR8	Q6NSR8	>sp|Q6NSR8|PEPL1_MOUSE Probable aminopeptidase NPEPL1 OS=Mus musculus (Mouse) OX=10090 GN=Npepl1 PE=1 SV=1	NPEPL1	4	4	-0.0293968	0.332463	0.715727	FALSE	19	20	19	20	-0.28756
B9EJR8	B9EJR8	>sp|B9EJR8|DAAF5_MOUSE Dynein assembly factor 5, axonemal OS=Mus musculus (Mouse) OX=10090 GN=Dnaaf5 PE=1 SV=1	DNAAF5	8	6	-0.0361989	0.330157	0.711869	FALSE	33	38	33	38	-0.72299
Q91YD9	Q91YD9	>sp|Q91YD9|WASL_MOUSE Neural Wiskott-Aldrich syndrome protein OS=Mus musculus (Mouse) OX=10090 GN=Wasl PE=1 SV=1	WASL	7	7	-0.115829	0.00023801	0.00237139	FALSE	35	35	35	35	-0.0443129
E9PVA8	E9PVA8	>sp|E9PVA8|GCN1_MOUSE eIF-2-alpha kinase activator GCN1 OS=Mus musculus (Mouse) OX=10090 GN=Gcn1 PE=1 SV=1	GCN1	59	45	-0.376434	5.10348e-11	3.96926e-09	TRUE	256	281	256	281	-0.502771
Q8CGU1	Q8CGU1	>sp|Q8CGU1|CACO1_MOUSE Calcium-binding and coiled-coil domain-containing protein 1 OS=Mus musculus (Mouse) OX=10090 GN=Calcoco1 PE=1 SV=2	CALCOCO1	11	6	-0.248968	0.00153822	0.0109063	FALSE	37	45	37	45	-0.988177
O08644	O08644	>sp|O08644|EPHB6_MOUSE Ephrin type-B receptor 6 OS=Mus musculus (Mouse) OX=10090 GN=Ephb6 PE=2 SV=4	EPHB6	1	1	-0.0720803	0.241195	0.566816	FALSE	4	5	4	5	-0.94439
Q9QY01	Q9QY01	>sp|Q9QY01|ULK2_MOUSE Serine/threonine-protein kinase ULK2 OS=Mus musculus (Mouse) OX=10090 GN=Ulk2 PE=1 SV=1	ULK2	6	6	-0.00681944	0.661042	1	FALSE	29	29	29	29	-0.0450494
Q8CGC7	Q8CGC7	>sp|Q8CGC7|SYEP_MOUSE Bifunctional glutamate/proline--tRNA ligase OS=Mus musculus (Mouse) OX=10090 GN=Eprs PE=1 SV=4	EPRS	46	41	-0.0033967	0.669918	1	FALSE	211	214	211	214	-0.114208
P35601	P35601	>sp|P35601|RFC1_MOUSE Replication factor C subunit 1 OS=Mus musculus (Mouse) OX=10090 GN=Rfc1 PE=1 SV=2	RFC1	3	2	0.0224627	0.393708	0.814561	FALSE	15	12	15	12	0.979514
Q80Y81	Q80Y81	>sp|Q80Y81|RNZ2_MOUSE Zinc phosphodiesterase ELAC protein 2 OS=Mus musculus (Mouse) OX=10090 GN=Elac2 PE=1 SV=1	ELAC2	10	10	0.0887721	0.00383145	0.0229225	FALSE	50	49	50	49	0.0530297
Q78T54	Q78T54	>sp|Q78T54|VMA21_MOUSE Vacuolar ATPase assembly integral membrane protein Vma21 OS=Mus musculus (Mouse) OX=10090 GN=Vma21 PE=1 SV=1	VMA21	2	1	0.96317	3.92684e-11	3.28905e-09	TRUE	9	6	9	6	1.71804
Q7TQF7	Q7TQF7	>sp|Q7TQF7|AMPH_MOUSE Amphiphysin OS=Mus musculus (Mouse) OX=10090 GN=Amph PE=1 SV=1	AMPH	16	14	-4.12492e-17	1	1	FALSE	76	73	76	73	0.15268
Q8JZZ7	Q8JZZ7	>sp|Q8JZZ7|AGRL2_MOUSE Adhesion G protein-coupled receptor L2 OS=Mus musculus (Mouse) OX=10090 GN=Adgrl2 PE=1 SV=3	ADGRL2	5	5	-0.0853286	0.078603	0.24665	FALSE	25	24	25	24	0.149138
Q7TMY8	Q7TMY8	>sp|Q7TMY8|HUWE1_MOUSE E3 ubiquitin-protein ligase HUWE1 OS=Mus musculus (Mouse) OX=10090 GN=Huwe1 PE=1 SV=5	HUWE1	31	26	-0.28662	1.14835e-12	1.38932e-10	FALSE	136	147	136	147	-0.425077
Q6PB44	Q6PB44	>sp|Q6PB44|PTN23_MOUSE Tyrosine-protein phosphatase non-receptor type 23 OS=Mus musculus (Mouse) OX=10090 GN=Ptpn23 PE=1 SV=2	PTPN23	29	25	-0.113629	0.00555269	0.0307801	FALSE	132	130	132	130	0.0307447
P28740	P28740	>sp|P28740|KIF2A_MOUSE Kinesin-like protein KIF2A OS=Mus musculus (Mouse) OX=10090 GN=Kif2a PE=1 SV=2	KIF2A	12	12	5.64601e-17	1	1	FALSE	60	60	60	60	-0.0441726
P62852	P62852	>sp|P62852|RS25_MOUSE 40S ribosomal protein S25 OS=Mus musculus (Mouse) OX=10090 GN=Rps25 PE=1 SV=1	RPS25	3	3	-7.1153e-17	1	1	FALSE	15	15	15	15	-0.0447409
Q8C015	Q8C015	>sp|Q8C015|PAK5_MOUSE Serine/threonine-protein kinase PAK 5 OS=Mus musculus (Mouse) OX=10090 GN=Pak5 PE=1 SV=1	PAK5	7	6	-9.34598e-20	1	1	FALSE	32	33	32	33	-0.193186
Q8VBT9	Q8VBT9	>sp|Q8VBT9|ASPC1_MOUSE Tether containing UBX domain for GLUT4 OS=Mus musculus (Mouse) OX=10090 GN=Aspscr1 PE=1 SV=1	ASPSCR1	11	11	0.0559472	0.00724689	0.0380412	FALSE	55	55	55	55	-0.0441907
O35954	O35954	>sp|O35954|PITM1_MOUSE Membrane-associated phosphatidylinositol transfer protein 1 OS=Mus musculus (Mouse) OX=10090 GN=Pitpnm1 PE=1 SV=1	PITPNM1	18	16	0.00681676	0.706426	1	FALSE	85	87	85	87	-0.15722
Q60996	Q60996	>sp|Q60996|2A5G_MOUSE Serine/threonine-protein phosphatase 2A 56 kDa regulatory subunit gamma isoform OS=Mus musculus (Mouse) OX=10090 GN=Ppp2r5c PE=1 SV=2	PPP2R5C	14	13	0	1	1	FALSE	68	68	68	68	-0.0439109
Q91ZX7	Q91ZX7	>sp|Q91ZX7|LRP1_MOUSE Prolow-density lipoprotein receptor-related protein 1 OS=Mus musculus (Mouse) OX=10090 GN=Lrp1 PE=1 SV=1	LRP1	39	31	-0.16728	9.86001e-06	0.00016409	FALSE	168	179	168	179	-0.355737
Q99JY0	Q99JY0	>sp|Q99JY0|ECHB_MOUSE Trifunctional enzyme subunit beta, mitochondrial OS=Mus musculus (Mouse) OX=10090 GN=Hadhb PE=1 SV=1	HADHB	16	16	-0.000326067	0.902815	1	FALSE	80	79	80	79	0.0171833
Q9EPK7	Q9EPK7	>sp|Q9EPK7|XPO7_MOUSE Exportin-7 OS=Mus musculus (Mouse) OX=10090 GN=Xpo7 PE=1 SV=3	XPO7	26	22	0.0085203	0.390817	0.81034	FALSE	122	122	122	122	-0.0440978
Q6NZJ6	Q6NZJ6	>sp|Q6NZJ6|IF4G1_MOUSE Eukaryotic translation initiation factor 4 gamma 1 OS=Mus musculus (Mouse) OX=10090 GN=Eif4g1 PE=1 SV=1	EIF4G1	28	28	-0.143886	0.000205714	0.002099	FALSE	140	139	140	139	-0.00868977
Q9D924	Q9D924	>sp|Q9D924|ISCA1_MOUSE Iron-sulfur cluster assembly 1 homolog, mitochondrial OS=Mus musculus (Mouse) OX=10090 GN=Isca1 PE=2 SV=1	ISCA1	4	4	0.0630597	0.163379	0.425905	FALSE	20	20	20	20	-0.0445575
Q6DVA0	Q6DVA0	>sp|Q6DVA0|LEMD2_MOUSE LEM domain-containing protein 2 OS=Mus musculus (Mouse) OX=10090 GN=Lemd2 PE=1 SV=1	LEMD2	4	4	0.00622392	0.659303	1	FALSE	20	20	20	20	-0.0445575
B1AUE5	B1AUE5	>sp|B1AUE5|PEX10_MOUSE Peroxisome biogenesis factor 10 OS=Mus musculus (Mouse) OX=10090 GN=Pex10 PE=2 SV=1	PEX10	2	2	-4.15125e-20	1	1	FALSE	10	9	10	9	0.426174
Q922F4	Q922F4	>sp|Q922F4|TBB6_MOUSE Tubulin beta-6 chain OS=Mus musculus (Mouse) OX=10090 GN=Tubb6 PE=1 SV=1	TUBB6	9	7	0	1	1	FALSE	35	42	35	42	-0.924776
Q9EQF6	Q9EQF6	>sp|Q9EQF6|DPYL5_MOUSE Dihydropyrimidinase-related protein 5 OS=Mus musculus (Mouse) OX=10090 GN=Dpysl5 PE=1 SV=1	DPYSL5	34	31	0.17793	1.39955e-05	0.000224104	FALSE	160	163	160	163	-0.134589
Q3UHK6	Q3UHK6	>sp|Q3UHK6|TEN4_MOUSE Teneurin-4 OS=Mus musculus (Mouse) OX=10090 GN=Tenm4 PE=1 SV=2	TENM4	17	16	-1.32267e-18	1	1	FALSE	80	84	80	84	-0.281506
Q80Z96	Q80Z96	>sp|Q80Z96|VANG1_MOUSE Vang-like protein 1 OS=Mus musculus (Mouse) OX=10090 GN=Vangl1 PE=1 SV=2	VANGL1	1	1	0.0326006	0.432573	0.871779	FALSE	5	4	5	4	0.851133
Q9Z110	Q9Z110	>sp|Q9Z110|P5CS_MOUSE Delta-1-pyrroline-5-carboxylate synthase OS=Mus musculus (Mouse) OX=10090 GN=Aldh18a1 PE=1 SV=2	ALDH18A1	24	22	-0.131711	0.000388173	0.00353906	FALSE	110	118	110	118	-0.38788
Q6ZPE2	Q6ZPE2	>sp|Q6ZPE2|MTMR5_MOUSE Myotubularin-related protein 5 OS=Mus musculus (Mouse) OX=10090 GN=Sbf1 PE=1 SV=2	SBF1	33	23	-0.336101	0.0011382	0.0084999	TRUE	135	155	135	155	-0.718988
Q8CHH9	Q8CHH9	>sp|Q8CHH9|SEPT8_MOUSE Septin-8 OS=Mus musculus (Mouse) OX=10090 GN=Septin8 PE=1 SV=4	SEPTIN8	11	11	-0.145215	2.78143e-07	7.48909e-06	FALSE	54	55	54	55	-0.133178
P26039	P26039	>sp|P26039|TLN1_MOUSE Talin-1 OS=Mus musculus (Mouse) OX=10090 GN=Tln1 PE=1 SV=2	TLN1	45	33	-0.463726	0.000349724	0.00325469	TRUE	182	211	182	211	-0.770733
Q9EQK7	Q9EQK7	>sp|Q9EQK7|ICMT_MOUSE Protein-S-isoprenylcysteine O-methyltransferase OS=Mus musculus (Mouse) OX=10090 GN=Icmt PE=2 SV=2	ICMT	1	1	0.0972499	0.144909	0.390282	FALSE	5	5	5	5	-0.046026
Q8BU33	Q8BU33	>sp|Q8BU33|ILVBL_MOUSE Acetolactate synthase-like protein OS=Mus musculus (Mouse) OX=10090 GN=Ilvbl PE=1 SV=1	ILVBL	5	4	-0.00879281	0.741918	1	FALSE	21	24	21	24	-0.67785
Q02257	Q02257	>sp|Q02257|PLAK_MOUSE Junction plakoglobin OS=Mus musculus (Mouse) OX=10090 GN=Jup PE=1 SV=3	JUP	9	8	0.201619	9.00449e-05	0.0010654	FALSE	45	41	45	41	0.404736
O35643;Q9DBG3	O35643;Q9DBG3	>sp|O35643|AP1B1_MOUSE AP-1 complex subunit beta-1 OS=Mus musculus (Mouse) OX=10090 GN=Ap1b1 PE=1 SV=2;>sp|Q9DBG3|AP2B1_MOUSE AP-2 complex subunit beta OS=Mus musculus (Mouse) OX=10090 GN=Ap2b1 PE=1 SV=1	AP1B1;AP2B1	23	23	-5.65753e-17	1	1	FALSE	114	114	114	114	-0.044252
P19096	P19096	>sp|P19096|FAS_MOUSE Fatty acid synthase OS=Mus musculus (Mouse) OX=10090 GN=Fasn PE=1 SV=2	FASN	67	57	-0.791693	3.36778e-28	6.4173e-25	TRUE	306	322	306	322	-0.293839
Q8C0L8	Q8C0L8	>sp|Q8C0L8|COG5_MOUSE Conserved oligomeric Golgi complex subunit 5 OS=Mus musculus (Mouse) OX=10090 GN=Cog5 PE=1 SV=3	COG5	9	9	0	1	1	FALSE	44	45	44	45	-0.153671
Q3UTJ2	Q3UTJ2	>sp|Q3UTJ2|SRBS2_MOUSE Sorbin and SH3 domain-containing protein 2 OS=Mus musculus (Mouse) OX=10090 GN=Sorbs2 PE=1 SV=2	SORBS2	34	33	-0.177131	0.0351228	0.133253	FALSE	167	170	167	170	-0.131589
Q6P542	Q6P542	>sp|Q6P542|ABCF1_MOUSE ATP-binding cassette sub-family F member 1 OS=Mus musculus (Mouse) OX=10090 GN=Abcf1 PE=1 SV=1	ABCF1	13	13	0	1	1	FALSE	64	65	64	65	-0.119561
Q9JKS5	Q9JKS5	>sp|Q9JKS5|HABP4_MOUSE Intracellular hyaluronan-binding protein 4 OS=Mus musculus (Mouse) OX=10090 GN=Habp4 PE=1 SV=2	HABP4	6	5	1.36832e-19	1	1	FALSE	27	27	27	27	-0.0410267
Q8BWT1	Q8BWT1	>sp|Q8BWT1|THIM_MOUSE 3-ketoacyl-CoA thiolase, mitochondrial OS=Mus musculus (Mouse) OX=10090 GN=Acaa2 PE=1 SV=3	ACAA2	14	12	0.0647408	0.0559808	0.189976	FALSE	62	61	62	61	0.0340982
Q8BLK3	Q8BLK3	>sp|Q8BLK3|LSAMP_MOUSE Limbic system-associated membrane protein OS=Mus musculus (Mouse) OX=10090 GN=Lsamp PE=1 SV=1	LSAMP	10	9	-0.0679471	0.282181	0.637269	FALSE	47	46	47	46	0.0598163
P49722	P49722	>sp|P49722|PSA2_MOUSE Proteasome subunit alpha type-2 OS=Mus musculus (Mouse) OX=10090 GN=Psma2 PE=1 SV=3	PSMA2	8	8	-8.41534e-20	1	1	FALSE	40	40	40	40	-0.0442712
A1L3P4	A1L3P4	>tr|A1L3P4|A1L3P4_MOUSE Sodium/hydrogen exchanger OS=Mus musculus (Mouse) OX=10090 GN=Slc9a6 PE=1 SV=1	SLC9A6	11	9	0.085386	0.00154368	0.0109247	FALSE	54	46	54	46	0.73046
Q80W47	Q80W47	>sp|Q80W47|WIPI2_MOUSE WD repeat domain phosphoinositide-interacting protein 2 OS=Mus musculus (Mouse) OX=10090 GN=Wipi2 PE=1 SV=1	WIPI2	6	6	-1.41132e-16	1	1	FALSE	30	29	30	29	0.117705
Q9D0M3	Q9D0M3	>sp|Q9D0M3|CY1_MOUSE Cytochrome c1, heme protein, mitochondrial OS=Mus musculus (Mouse) OX=10090 GN=Cyc1 PE=1 SV=1	CYC1	6	6	0.0159651	0.479099	0.942372	FALSE	29	29	29	29	-0.0428135
P97770	P97770	>sp|P97770|THUM3_MOUSE THUMP domain-containing protein 3 OS=Mus musculus (Mouse) OX=10090 GN=Thumpd3 PE=1 SV=1	THUMPD3	7	7	2.08158e-17	1	1	FALSE	34	34	34	34	-0.0460305
Q9JKR6	Q9JKR6	>sp|Q9JKR6|HYOU1_MOUSE Hypoxia up-regulated protein 1 OS=Mus musculus (Mouse) OX=10090 GN=Hyou1 PE=1 SV=1	HYOU1	30	28	-0.111016	4.15946e-08	1.45429e-06	FALSE	149	146	149	146	0.056238
Q99KH8	Q99KH8	>sp|Q99KH8|STK24_MOUSE Serine/threonine-protein kinase 24 OS=Mus musculus (Mouse) OX=10090 GN=Stk24 PE=1 SV=1	STK24	5	5	-0.0469366	0.0658038	0.215723	FALSE	25	25	25	25	-0.0444446
Q9Z2W1	Q9Z2W1	>sp|Q9Z2W1|STK25_MOUSE Serine/threonine-protein kinase 25 OS=Mus musculus (Mouse) OX=10090 GN=Stk25 PE=1 SV=2	STK25	4	3	0	1	1	FALSE	17	19	17	19	-0.566082
Q8BMF4	Q8BMF4	>sp|Q8BMF4|ODP2_MOUSE Dihydrolipoyllysine-residue acetyltransferase component of pyruvate dehydrogenase complex, mitochondrial OS=Mus musculus (Mouse) OX=10090 GN=Dlat PE=1 SV=2	DLAT	13	12	0.192726	0.00023127	0.00232245	FALSE	65	63	65	63	0.107976
Q921N6	Q921N6	>sp|Q921N6|DDX27_MOUSE Probable ATP-dependent RNA helicase DDX27 OS=Mus musculus (Mouse) OX=10090 GN=Ddx27 PE=1 SV=3	DDX27	3	3	2.82635e-18	1	1	FALSE	14	14	14	14	-0.0471824
Q9DB70	Q9DB70	>sp|Q9DB70|FUND1_MOUSE FUN14 domain-containing protein 1 OS=Mus musculus (Mouse) OX=10090 GN=Fundc1 PE=1 SV=1	FUNDC1	1	1	0.135086	0.0461008	0.164813	FALSE	5	5	5	5	-0.046026
Q9D8S3	Q9D8S3	>sp|Q9D8S3|ARFG3_MOUSE ADP-ribosylation factor GTPase-activating protein 3 OS=Mus musculus (Mouse) OX=10090 GN=Arfgap3 PE=1 SV=2	ARFGAP3	6	6	-2.64508e-20	1	1	FALSE	30	30	30	30	-0.0443681
Q9D819	Q9D819	>sp|Q9D819|IPYR_MOUSE Inorganic pyrophosphatase OS=Mus musculus (Mouse) OX=10090 GN=Ppa1 PE=1 SV=1	PPA1	12	10	-1.68002e-18	1	1	FALSE	57	55	57	55	0.128059
Q9D0S9	Q9D0S9	>sp|Q9D0S9|HINT2_MOUSE Histidine triad nucleotide-binding protein 2, mitochondrial OS=Mus musculus (Mouse) OX=10090 GN=Hint2 PE=1 SV=1	HINT2	3	3	0.0852898	0.00532405	0.0296836	FALSE	15	15	15	15	-0.0447409
Q9JIS5	Q9JIS5	>sp|Q9JIS5|SV2A_MOUSE Synaptic vesicle glycoprotein 2A OS=Mus musculus (Mouse) OX=10090 GN=Sv2a PE=1 SV=1	SV2A	13	12	0.0668516	0.238362	0.561258	FALSE	63	60	63	60	0.193165
Q922H2	Q922H2	>sp|Q922H2|PDK3_MOUSE [Pyruvate dehydrogenase (acetyl-transferring)] kinase isozyme 3, mitochondrial OS=Mus musculus (Mouse) OX=10090 GN=Pdk3 PE=1 SV=1	PDK3	9	7	0.0170954	0.546547	1	FALSE	39	40	39	40	-0.168219
Q80V91	Q80V91	>sp|Q80V91|DTX3_MOUSE Probable E3 ubiquitin-protein ligase DTX3 OS=Mus musculus (Mouse) OX=10090 GN=Dtx3 PE=1 SV=2	DTX3	3	3	5.71736e-19	1	1	FALSE	14	15	14	15	-0.362518
Q91WG5	Q91WG5	>sp|Q91WG5|AAKG2_MOUSE 5'-AMP-activated protein kinase subunit gamma-2 OS=Mus musculus (Mouse) OX=10090 GN=Prkag2 PE=1 SV=2	PRKAG2	11	11	0.0345676	0.196146	0.484612	FALSE	55	55	55	55	-0.0441907
Q8VCB2	Q8VCB2	>sp|Q8VCB2|MED25_MOUSE Mediator of RNA polymerase II transcription subunit 25 OS=Mus musculus (Mouse) OX=10090 GN=Med25 PE=1 SV=1	MED25	1	1	0	1	1	FALSE	4	5	4	5	-0.947666
Q6P9Z1	Q6P9Z1	>sp|Q6P9Z1|SMRD3_MOUSE SWI/SNF-related matrix-associated actin-dependent regulator of chromatin subfamily D member 3 OS=Mus musculus (Mouse) OX=10090 GN=Smarcd3 PE=1 SV=2	SMARCD3	11	10	0	1	1	FALSE	51	48	51	48	0.249165
P48453	P48453	>sp|P48453|PP2BB_MOUSE Serine/threonine-protein phosphatase 2B catalytic subunit beta isoform OS=Mus musculus (Mouse) OX=10090 GN=Ppp3cb PE=1 SV=2	PPP3CB	9	9	0	1	1	FALSE	44	44	44	44	-0.0435629
Q9JJW0	Q9JJW0	>sp|Q9JJW0|PXMP4_MOUSE Peroxisomal membrane protein 4 OS=Mus musculus (Mouse) OX=10090 GN=Pxmp4 PE=1 SV=3	PXMP4	1	1	-0.0556138	0.203685	0.499996	FALSE	5	5	5	5	-0.046026
Q8VCC9	Q8VCC9	>sp|Q8VCC9|SPON1_MOUSE Spondin-1 OS=Mus musculus (Mouse) OX=10090 GN=Spon1 PE=1 SV=1	SPON1	1	1	-0.131968	0.0220772	0.0922547	FALSE	5	5	5	5	-0.046026
Q9JLV1	Q9JLV1	>sp|Q9JLV1|BAG3_MOUSE BAG family molecular chaperone regulator 3 OS=Mus musculus (Mouse) OX=10090 GN=Bag3 PE=1 SV=2	BAG3	4	3	-1.28116e-17	1	1	FALSE	14	15	14	15	-0.364052
Q8VC30	Q8VC30	>sp|Q8VC30|TKFC_MOUSE Triokinase/FMN cyclase OS=Mus musculus (Mouse) OX=10090 GN=Tkfc PE=1 SV=1	TKFC	12	11	-3.71223e-16	1	1	FALSE	57	55	57	55	0.12842
Q3UHC7	Q3UHC7	>sp|Q3UHC7|DAB2P_MOUSE Disabled homolog 2-interacting protein OS=Mus musculus (Mouse) OX=10090 GN=Dab2ip PE=1 SV=1	DAB2IP	15	13	0.34224	4.31874e-13	5.87811e-11	TRUE	72	64	72	64	0.528791
Q8C547	Q8C547	>sp|Q8C547|HTR5B_MOUSE HEAT repeat-containing protein 5B OS=Mus musculus (Mouse) OX=10090 GN=Heatr5b PE=1 SV=3	HEATR5B	22	18	-0.114821	0.00725994	0.0380617	FALSE	93	102	93	102	-0.494431
Q9JIG7	Q9JIG7	>sp|Q9JIG7|CCD22_MOUSE Coiled-coil domain-containing protein 22 OS=Mus musculus (Mouse) OX=10090 GN=Ccdc22 PE=1 SV=1	CCDC22	15	15	-0.0506321	0.00212677	0.0142071	FALSE	74	74	74	74	-0.0441774
P54103	P54103	>sp|P54103|DNJC2_MOUSE DnaJ homolog subfamily C member 2 OS=Mus musculus (Mouse) OX=10090 GN=Dnajc2 PE=1 SV=2	DNAJC2	8	6	0.0595503	0.0373907	0.139678	FALSE	39	34	39	34	0.614772
Q3ZK22	Q3ZK22	>sp|Q3ZK22|VEZA_MOUSE Vezatin OS=Mus musculus (Mouse) OX=10090 GN=Vezt PE=1 SV=2	VEZT	5	5	-0.0807845	0.00109429	0.00826627	FALSE	25	24	25	24	0.150505
P70353	P70353	>sp|P70353|NFYC_MOUSE Nuclear transcription factor Y subunit gamma OS=Mus musculus (Mouse) OX=10090 GN=Nfyc PE=1 SV=2	NFYC	5	5	-3.14465e-16	1	1	FALSE	24	24	24	24	-0.0452652
Q8BL66	Q8BL66	>sp|Q8BL66|EEA1_MOUSE Early endosome antigen 1 OS=Mus musculus (Mouse) OX=10090 GN=Eea1 PE=1 SV=2	EEA1	38	35	-0.0667652	3.11061e-06	6.23922e-05	FALSE	179	186	179	186	-0.231936
Q61292	Q61292	>sp|Q61292|LAMB2_MOUSE Laminin subunit beta-2 OS=Mus musculus (Mouse) OX=10090 GN=Lamb2 PE=1 SV=2	LAMB2	22	20	-0.287038	0.00744737	0.0387202	FALSE	103	108	103	108	-0.275641
Q9D7B6	Q9D7B6	>sp|Q9D7B6|ACAD8_MOUSE Isobutyryl-CoA dehydrogenase, mitochondrial OS=Mus musculus (Mouse) OX=10090 GN=Acad8 PE=1 SV=2	ACAD8	10	9	0.0960453	0.00159836	0.0112387	FALSE	46	46	46	46	-0.0440464
Q8VCM8	Q8VCM8	>sp|Q8VCM8|NCLN_MOUSE Nicalin OS=Mus musculus (Mouse) OX=10090 GN=Ncln PE=1 SV=2	NCLN	14	12	-0.0663767	0.00561249	0.0310178	FALSE	67	64	67	64	0.177775
P02469	P02469	>sp|P02469|LAMB1_MOUSE Laminin subunit beta-1 OS=Mus musculus (Mouse) OX=10090 GN=Lamb1 PE=1 SV=3	LAMB1	28	23	-3.28302e-16	1	1	FALSE	128	128	128	128	-0.0448223
Q9Z1K7	Q9Z1K7	>sp|Q9Z1K7|APCL_MOUSE Adenomatous polyposis coli protein 2 OS=Mus musculus (Mouse) OX=10090 GN=Apc2 PE=1 SV=1	APC2	2	2	0	1	1	FALSE	9	10	9	10	-0.512081
P06837	P06837	>sp|P06837|NEUM_MOUSE Neuromodulin OS=Mus musculus (Mouse) OX=10090 GN=Gap43 PE=1 SV=1	GAP43	5	5	0.0787892	0.232941	0.551049	FALSE	25	24	25	24	0.150505
P53986	P53986	>sp|P53986|MOT1_MOUSE Monocarboxylate transporter 1 OS=Mus musculus (Mouse) OX=10090 GN=Slc16a1 PE=1 SV=1	SLC16A1	5	5	-4.29548e-16	1	1	FALSE	25	25	25	25	-0.0444446
E1U8D0	E1U8D0	>sp|E1U8D0|SOGA1_MOUSE Protein SOGA1 OS=Mus musculus (Mouse) OX=10090 GN=Soga1 PE=1 SV=3	SOGA1	17	13	0	1	1	FALSE	80	73	80	73	0.401307
Q9D0I9	Q9D0I9	>sp|Q9D0I9|SYRC_MOUSE Arginine--tRNA ligase, cytoplasmic OS=Mus musculus (Mouse) OX=10090 GN=Rars PE=1 SV=2	RARS	27	26	-0.0579944	1.50267e-05	0.000235404	FALSE	134	133	134	133	-0.0076356
F8VQ05	F8VQ05	>tr|F8VQ05|F8VQ05_MOUSE FRY-like transcription coactivator OS=Mus musculus (Mouse) OX=10090 GN=Fryl PE=1 SV=1	FRYL	11	10	-0.11121	3.82273e-05	0.000515696	FALSE	48	52	48	52	-0.431435
Q810U5	Q810U5	>sp|Q810U5|CCD50_MOUSE Coiled-coil domain-containing protein 50 OS=Mus musculus (Mouse) OX=10090 GN=Ccdc50 PE=1 SV=1	CCDC50	1	1	0.036706	0.362883	0.7666	FALSE	5	5	5	5	-0.046026
O54967	O54967	>sp|O54967|ACK1_MOUSE Activated CDC42 kinase 1 OS=Mus musculus (Mouse) OX=10090 GN=Tnk2 PE=1 SV=2	TNK2	3	1	-0.0186595	0.557478	1	FALSE	8	11	8	11	-1.47689
Q8BYA0	Q8BYA0	>sp|Q8BYA0|TBCD_MOUSE Tubulin-specific chaperone D OS=Mus musculus (Mouse) OX=10090 GN=Tbcd PE=1 SV=1	TBCD	15	12	-0.0320066	0.195277	0.483528	FALSE	69	65	69	65	0.246954
Q8C0I1	Q8C0I1	>sp|Q8C0I1|ADAS_MOUSE Alkyldihydroxyacetonephosphate synthase, peroxisomal OS=Mus musculus (Mouse) OX=10090 GN=Agps PE=1 SV=1	AGPS	18	16	-0.00560854	0.652992	1	FALSE	85	85	85	85	-0.0445048
Q9QZQ8	Q9QZQ8	>sp|Q9QZQ8|H2AY_MOUSE Core histone macro-H2A.1 OS=Mus musculus (Mouse) OX=10090 GN=H2afy PE=1 SV=3	H2AFY	10	10	-0.00414205	0.756247	1	FALSE	50	49	50	49	0.0542019
Q80X85	Q80X85	>sp|Q80X85|RT07_MOUSE 28S ribosomal protein S7, mitochondrial OS=Mus musculus (Mouse) OX=10090 GN=Mrps7 PE=1 SV=1	MRPS7	3	3	0.0253097	0.427698	0.865384	FALSE	15	14	15	14	0.273844
Q921G8	Q921G8	>sp|Q921G8|GCP2_MOUSE Gamma-tubulin complex component 2 OS=Mus musculus (Mouse) OX=10090 GN=Tubgcp2 PE=1 SV=2	TUBGCP2	16	12	0	1	1	FALSE	76	72	76	72	0.220024
Q9Z0R4	Q9Z0R4	>sp|Q9Z0R4|ITSN1_MOUSE Intersectin-1 OS=Mus musculus (Mouse) OX=10090 GN=Itsn1 PE=1 SV=2	ITSN1	27	23	0.0819174	2.38058e-07	6.52691e-06	FALSE	123	118	123	118	0.159069
Q3URD3	Q3URD3	>sp|Q3URD3|SLMAP_MOUSE Sarcolemmal membrane-associated protein OS=Mus musculus (Mouse) OX=10090 GN=Slmap PE=1 SV=2	SLMAP	12	11	-0.111463	6.14395e-07	1.50094e-05	FALSE	54	58	54	58	-0.393353
A2AAY5	A2AAY5	>sp|A2AAY5|SPD2B_MOUSE SH3 and PX domain-containing protein 2B OS=Mus musculus (Mouse) OX=10090 GN=Sh3pxd2b PE=1 SV=1	SH3PXD2B	14	12	-3.14957e-17	1	1	FALSE	67	64	67	64	0.176637
Q8CG76	Q8CG76	>sp|Q8CG76|ARK72_MOUSE Aflatoxin B1 aldehyde reductase member 2 OS=Mus musculus (Mouse) OX=10090 GN=Akr7a2 PE=1 SV=3	AKR7A2	8	8	0.0237746	0.170979	0.43864	FALSE	40	39	40	39	0.0775962
P97429	P97429	>sp|P97429|ANXA4_MOUSE Annexin A4 OS=Mus musculus (Mouse) OX=10090 GN=Anxa4 PE=1 SV=4	ANXA4	9	9	-0.0605648	0.138158	0.377433	FALSE	45	45	45	45	-0.0442385
O88705	O88705	>sp|O88705|HCN3_MOUSE Potassium/sodium hyperpolarization-activated cyclic nucleotide-gated channel 3 OS=Mus musculus (Mouse) OX=10090 GN=Hcn3 PE=1 SV=1	HCN3	5	5	0.0604063	0.108824	0.315384	FALSE	25	25	25	25	-0.0444446
Q8VCW8	Q8VCW8	>sp|Q8VCW8|ACSF2_MOUSE Medium-chain acyl-CoA ligase ACSF2, mitochondrial OS=Mus musculus (Mouse) OX=10090 GN=Acsf2 PE=1 SV=1	ACSF2	14	13	-0.0545909	0.0309442	0.121093	FALSE	66	67	66	67	-0.118905
Q9DB29	Q9DB29	>sp|Q9DB29|IAH1_MOUSE Isoamyl acetate-hydrolyzing esterase 1 homolog OS=Mus musculus (Mouse) OX=10090 GN=Iah1 PE=1 SV=1	IAH1	6	5	1.73326e-19	1	1	FALSE	26	29	26	29	-0.564316
P19536	P19536	>sp|P19536|COX5B_MOUSE Cytochrome c oxidase subunit 5B, mitochondrial OS=Mus musculus (Mouse) OX=10090 GN=Cox5b PE=1 SV=1	COX5B	7	7	0.309879	4.3899e-11	3.52208e-09	TRUE	34	33	34	33	0.0989304
O70305	O70305	>sp|O70305|ATX2_MOUSE Ataxin-2 OS=Mus musculus (Mouse) OX=10090 GN=Atxn2 PE=1 SV=1	ATXN2	15	15	0.0812529	0.00524046	0.0292836	FALSE	74	74	74	74	-0.0435079
P98203	P98203	>sp|P98203|ARVC_MOUSE Armadillo repeat protein deleted in velo-cardio-facial syndrome homolog OS=Mus musculus (Mouse) OX=10090 GN=Arvcf PE=1 SV=2	ARVCF	22	22	-0.0947035	0.115131	0.328662	FALSE	109	107	109	107	0.046915
Q8BGD9	Q8BGD9	>sp|Q8BGD9|IF4B_MOUSE Eukaryotic translation initiation factor 4B OS=Mus musculus (Mouse) OX=10090 GN=Eif4b PE=1 SV=1	EIF4B	6	6	0.0376271	0.219605	0.52719	FALSE	30	29	30	29	0.118607
Q920B9	Q920B9	>sp|Q920B9|SP16H_MOUSE FACT complex subunit SPT16 OS=Mus musculus (Mouse) OX=10090 GN=Supt16h PE=1 SV=2	SUPT16H	14	14	0.0494993	0.0766818	0.241716	FALSE	66	67	66	67	-0.116476
Q6DFZ1	Q6DFZ1	>tr|Q6DFZ1|Q6DFZ1_MOUSE SEC7 domain-containing protein OS=Mus musculus (Mouse) OX=10090 GN=Gbf1 PE=1 SV=1	GBF1	26	25	-0.123337	0.00197733	0.0133373	FALSE	128	126	128	126	0.0329362
Q99PU5	Q99PU5	>sp|Q99PU5|ACBG1_MOUSE Long-chain-fatty-acid--CoA ligase ACSBG1 OS=Mus musculus (Mouse) OX=10090 GN=Acsbg1 PE=1 SV=1	ACSBG1	28	26	-2.86112e-16	1	1	FALSE	135	136	135	136	-0.0790058
Q9Z223	Q9Z223	>sp|Q9Z223|MOC2B_MOUSE Molybdopterin synthase catalytic subunit OS=Mus musculus (Mouse) OX=10090 GN=Mocs2 PE=1 SV=3	MOCS2	3	3	-1.51733e-18	1	1	FALSE	15	15	15	15	-0.0447409
Q8CC35	Q8CC35	>sp|Q8CC35|SYNPO_MOUSE Synaptopodin OS=Mus musculus (Mouse) OX=10090 GN=Synpo PE=1 SV=2	SYNPO	7	6	0	1	1	FALSE	34	33	34	33	0.100326
O35927	O35927	>sp|O35927|CTND2_MOUSE Catenin delta-2 OS=Mus musculus (Mouse) OX=10090 GN=Ctnnd2 PE=1 SV=1	CTNND2	24	22	-3.52245e-18	1	1	FALSE	114	116	114	116	-0.129405
Q9CZW6	Q9CZW6	>sp|Q9CZW6|RN146_MOUSE E3 ubiquitin-protein ligase RNF146 OS=Mus musculus (Mouse) OX=10090 GN=Rnf146 PE=1 SV=2	RNF146	1	1	0	1	1	FALSE	5	5	5	5	-0.046026
Q9QYE6	Q9QYE6	>sp|Q9QYE6|GOGA5_MOUSE Golgin subfamily A member 5 OS=Mus musculus (Mouse) OX=10090 GN=Golga5 PE=1 SV=2	GOLGA5	10	8	-0.0275082	0.145667	0.391616	FALSE	44	49	44	49	-0.564305
O08688	O08688	>sp|O08688|CAN5_MOUSE Calpain-5 OS=Mus musculus (Mouse) OX=10090 GN=Capn5 PE=1 SV=1	CAPN5	14	12	0.352583	6.34801e-09	2.74912e-07	TRUE	67	64	67	64	0.178474
P70202	P70202	>sp|P70202|LXN_MOUSE Latexin OS=Mus musculus (Mouse) OX=10090 GN=Lxn PE=1 SV=2	LXN	6	3	-2.4067e-12	0.999995	1	FALSE	26	23	26	23	0.536689
Q8VBY2	Q8VBY2	>sp|Q8VBY2|KKCC1_MOUSE Calcium/calmodulin-dependent protein kinase kinase 1 OS=Mus musculus (Mouse) OX=10090 GN=Camkk1 PE=1 SV=1	CAMKK1	6	6	8.94468e-20	1	1	FALSE	29	30	29	30	-0.207649
Q80Z38	Q80Z38	>sp|Q80Z38|SHAN2_MOUSE SH3 and multiple ankyrin repeat domains protein 2 OS=Mus musculus (Mouse) OX=10090 GN=Shank2 PE=1 SV=2	SHANK2	20	19	7.56953e-16	1	1	FALSE	98	94	98	94	0.159162
Q9Z1Z2	Q9Z1Z2	>sp|Q9Z1Z2|STRAP_MOUSE Serine-threonine kinase receptor-associated protein OS=Mus musculus (Mouse) OX=10090 GN=Strap PE=1 SV=2	STRAP	12	12	0.054035	0.0132158	0.061721	FALSE	60	60	60	60	-0.0441726
P81117	P81117	>sp|P81117|NUCB2_MOUSE Nucleobindin-2 OS=Mus musculus (Mouse) OX=10090 GN=Nucb2 PE=1 SV=2	NUCB2	5	5	5.62634e-19	1	1	FALSE	25	25	25	25	-0.0444446
Q8C4B4	Q8C4B4	>sp|Q8C4B4|U119B_MOUSE Protein unc-119 homolog B OS=Mus musculus (Mouse) OX=10090 GN=Unc119b PE=1 SV=1	UNC119B	5	4	-0.133947	4.32735e-05	0.000569656	FALSE	21	21	21	21	-0.0466685
Q922R8	Q922R8	>sp|Q922R8|PDIA6_MOUSE Protein disulfide-isomerase A6 OS=Mus musculus (Mouse) OX=10090 GN=Pdia6 PE=1 SV=3	PDIA6	12	12	-0.144069	0.00818137	0.0417952	FALSE	59	60	59	60	-0.125809
B9EKI3	B9EKI3	>sp|B9EKI3|TMF1_MOUSE TATA element modulatory factor OS=Mus musculus (Mouse) OX=10090 GN=Tmf1 PE=1 SV=2	TMF1	6	4	0	1	1	FALSE	27	25	27	25	0.324803
Q8JZM7	Q8JZM7	>sp|Q8JZM7|CDC73_MOUSE Parafibromin OS=Mus musculus (Mouse) OX=10090 GN=Cdc73 PE=1 SV=1	CDC73	8	7	3.25248e-19	1	1	FALSE	37	37	37	37	-0.0436622
Q61586	Q61586	>sp|Q61586|GPAT1_MOUSE Glycerol-3-phosphate acyltransferase 1, mitochondrial OS=Mus musculus (Mouse) OX=10090 GN=Gpam PE=1 SV=2	GPAM	7	5	0.034259	0.177563	0.451396	FALSE	32	31	32	31	0.107285
Q8C1Z7	Q8C1Z7	>sp|Q8C1Z7|BBS4_MOUSE Bardet-Biedl syndrome 4 protein homolog OS=Mus musculus (Mouse) OX=10090 GN=Bbs4 PE=1 SV=1	BBS4	3	2	2.00955e-17	1	1	FALSE	13	12	13	12	0.317374
P55264	P55264	>sp|P55264|ADK_MOUSE Adenosine kinase OS=Mus musculus (Mouse) OX=10090 GN=Adk PE=1 SV=2	ADK	10	9	-0.0861567	0.000147606	0.00160264	FALSE	47	48	47	48	-0.147002
Q3U2I3	Q3U2I3	>sp|Q3U2I3|F16A2_MOUSE FTS and Hook-interacting protein OS=Mus musculus (Mouse) OX=10090 GN=Fam160a2 PE=1 SV=2	FAM160A2	12	10	0	1	1	FALSE	56	56	56	56	-0.0433784
Q9JKK7	Q9JKK7	>sp|Q9JKK7|TMOD2_MOUSE Tropomodulin-2 OS=Mus musculus (Mouse) OX=10090 GN=Tmod2 PE=1 SV=2	TMOD2	12	12	0	1	1	FALSE	60	59	60	59	0.0369948
P12367	P12367	>sp|P12367|KAP2_MOUSE cAMP-dependent protein kinase type II-alpha regulatory subunit OS=Mus musculus (Mouse) OX=10090 GN=Prkar2a PE=1 SV=2	PRKAR2A	7	7	0.0804406	0.0116223	0.0556088	FALSE	34	35	34	35	-0.18345
P31324	P31324	>sp|P31324|KAP3_MOUSE cAMP-dependent protein kinase type II-beta regulatory subunit OS=Mus musculus (Mouse) OX=10090 GN=Prkar2b PE=1 SV=3	PRKAR2B	9	9	0.36255	9.90077e-13	1.21716e-10	TRUE	45	45	45	45	-0.0442385
Q99104	Q99104	>sp|Q99104|MYO5A_MOUSE Unconventional myosin-Va OS=Mus musculus (Mouse) OX=10090 GN=Myo5a PE=1 SV=2	MYO5A	55	50	-0.0803748	0.00910609	0.0456923	FALSE	258	262	258	262	-0.119737
Q9QYI3	Q9QYI3	>sp|Q9QYI3|DNJC7_MOUSE DnaJ homolog subfamily C member 7 OS=Mus musculus (Mouse) OX=10090 GN=Dnajc7 PE=1 SV=2	DNAJC7	14	13	-0.0484921	0.0369485	0.138662	FALSE	65	65	65	65	-0.0445247
Q9D6T0	Q9D6T0	>sp|Q9D6T0|NOSIP_MOUSE Nitric oxide synthase-interacting protein OS=Mus musculus (Mouse) OX=10090 GN=Nosip PE=1 SV=1	NOSIP	4	4	9.0028e-13	0.999999	1	FALSE	20	20	20	20	-0.0445575
E9PXF8	E9PXF8	>sp|E9PXF8|MTMRD_MOUSE Myotubularin-related protein 13 OS=Mus musculus (Mouse) OX=10090 GN=Sbf2 PE=1 SV=1	SBF2	15	12	-0.0839259	0.000617416	0.0051096	FALSE	69	67	69	67	0.0993923
Q6NZA9	Q6NZA9	>sp|Q6NZA9|TAF9B_MOUSE Transcription initiation factor TFIID subunit 9B OS=Mus musculus (Mouse) OX=10090 GN=Taf9b PE=1 SV=2	TAF9B	2	2	0.107017	0.0136053	0.0630771	FALSE	10	10	10	10	-0.0450912
Q9JHU4	Q9JHU4	>sp|Q9JHU4|DYHC1_MOUSE Cytoplasmic dynein 1 heavy chain 1 OS=Mus musculus (Mouse) OX=10090 GN=Dync1h1 PE=1 SV=2	DYNC1H1	149	137	-0.35418	1.5974e-08	6.27596e-07	TRUE	700	718	700	718	-0.169314
P13595	P13595	>sp|P13595|NCAM1_MOUSE Neural cell adhesion molecule 1 OS=Mus musculus (Mouse) OX=10090 GN=Ncam1 PE=1 SV=3	NCAM1	30	29	-0.0817136	0.095189	0.286205	FALSE	150	146	150	146	0.088385
Q8CJ67	Q8CJ67	>sp|Q8CJ67|STAU2_MOUSE Double-stranded RNA-binding protein Staufen homolog 2 OS=Mus musculus (Mouse) OX=10090 GN=Stau2 PE=1 SV=1	STAU2	13	12	0.103978	0.0060756	0.0330066	FALSE	63	61	63	61	0.113454
Q61140	Q61140	>sp|Q61140|BCAR1_MOUSE Breast cancer anti-estrogen resistance protein 1 OS=Mus musculus (Mouse) OX=10090 GN=Bcar1 PE=1 SV=2	BCAR1	5	4	0.00339132	0.753231	1	FALSE	22	25	22	25	-0.649351
Q8K341	Q8K341	>sp|Q8K341|ATAT_MOUSE Alpha-tubulin N-acetyltransferase 1 OS=Mus musculus (Mouse) OX=10090 GN=Atat1 PE=1 SV=1	ATAT1	8	8	0.23104	3.86598e-06	7.53619e-05	FALSE	40	40	40	40	-0.0442712
P63054	P63054	>sp|P63054|PCP4_MOUSE Calmodulin regulator protein PCP4 OS=Mus musculus (Mouse) OX=10090 GN=Pcp4 PE=3 SV=2	PCP4	1	1	0.0122601	0.682015	1	FALSE	5	5	5	5	-0.046026
Q02053	Q02053	>sp|Q02053|UBA1_MOUSE Ubiquitin-like modifier-activating enzyme 1 OS=Mus musculus (Mouse) OX=10090 GN=Uba1 PE=1 SV=1	UBA1	43	42	-2.80269e-17	1	1	FALSE	211	210	211	210	-0.0206407
P51660	P51660	>sp|P51660|DHB4_MOUSE Peroxisomal multifunctional enzyme type 2 OS=Mus musculus (Mouse) OX=10090 GN=Hsd17b4 PE=1 SV=3	HSD17B4	15	15	-0.0612179	0.0383954	0.142547	FALSE	75	74	75	74	0.0213282
Q8K2D3	Q8K2D3	>sp|Q8K2D3|EDC3_MOUSE Enhancer of mRNA-decapping protein 3 OS=Mus musculus (Mouse) OX=10090 GN=Edc3 PE=1 SV=1	EDC3	5	4	-0.00871872	0.680374	1	FALSE	21	23	21	23	-0.475379
P28474	P28474	>sp|P28474|ADHX_MOUSE Alcohol dehydrogenase class-3 OS=Mus musculus (Mouse) OX=10090 GN=Adh5 PE=1 SV=3	ADH5	6	4	-6.18886e-17	1	1	FALSE	28	26	28	26	0.30654
Q99LC5	Q99LC5	>sp|Q99LC5|ETFA_MOUSE Electron transfer flavoprotein subunit alpha, mitochondrial OS=Mus musculus (Mouse) OX=10090 GN=Etfa PE=1 SV=2	ETFA	14	13	9.1584e-18	1	1	FALSE	69	65	69	65	0.246142
Q7TPV2	Q7TPV2	>sp|Q7TPV2|DZIP3_MOUSE E3 ubiquitin-protein ligase DZIP3 OS=Mus musculus (Mouse) OX=10090 GN=Dzip3 PE=1 SV=2	DZIP3	6	5	-0.0257819	0.26368	0.605447	FALSE	28	27	28	27	0.12783
Q8VCN9	Q8VCN9	>sp|Q8VCN9|TBCC_MOUSE Tubulin-specific chaperone C OS=Mus musculus (Mouse) OX=10090 GN=Tbcc PE=1 SV=1	TBCC	7	7	-3.70417e-20	1	1	FALSE	35	34	35	34	0.0956993
P70168	P70168	>sp|P70168|IMB1_MOUSE Importin subunit beta-1 OS=Mus musculus (Mouse) OX=10090 GN=Kpnb1 PE=1 SV=2	KPNB1	29	28	-5.48597e-16	1	1	FALSE	143	142	143	142	-0.00907379
Q3TXS7	Q3TXS7	>sp|Q3TXS7|PSMD1_MOUSE 26S proteasome non-ATPase regulatory subunit 1 OS=Mus musculus (Mouse) OX=10090 GN=Psmd1 PE=1 SV=1	PSMD1	33	33	-0.0571423	0.0001706	0.00181862	FALSE	164	163	164	163	-0.0143169
Q61545	Q61545	>sp|Q61545|EWS_MOUSE RNA-binding protein EWS OS=Mus musculus (Mouse) OX=10090 GN=Ewsr1 PE=1 SV=2	EWSR1	4	2	0.0551687	0.134561	0.369935	FALSE	12	14	12	14	-0.753447
P0CAX8	P0CAX8	>sp|P0CAX8|TGAP1_MOUSE T-cell activation GTPase-activating protein 1 OS=Mus musculus (Mouse) OX=10090 GN=Tagap1 PE=2 SV=1	TAGAP1	1	1	0	1	1	FALSE	4	4	4	4	-0.0471353
P01027	P01027	>sp|P01027|CO3_MOUSE Complement C3 OS=Mus musculus (Mouse) OX=10090 GN=C3 PE=1 SV=3	C3	14	9	0	1	1	FALSE	59	65	59	65	-0.517311
Q9JIK5	Q9JIK5	>sp|Q9JIK5|DDX21_MOUSE Nucleolar RNA helicase 2 OS=Mus musculus (Mouse) OX=10090 GN=Ddx21 PE=1 SV=3	DDX21	12	11	0.0438481	0.180498	0.456304	FALSE	59	56	59	56	0.20858
Q920I9	Q920I9	>sp|Q920I9|WDR7_MOUSE WD repeat-containing protein 7 OS=Mus musculus (Mouse) OX=10090 GN=Wdr7 PE=1 SV=3	WDR7	36	36	-7.5452e-16	1	1	FALSE	177	177	177	177	-0.0437115
Q9WU60	Q9WU60	>sp|Q9WU60|ATRN_MOUSE Attractin OS=Mus musculus (Mouse) OX=10090 GN=Atrn PE=1 SV=3	ATRN	4	3	-0.0257149	0.278133	0.631308	FALSE	17	15	17	15	0.536225
Q9WVQ5	Q9WVQ5	>sp|Q9WVQ5|MTNB_MOUSE Methylthioribulose-1-phosphate dehydratase OS=Mus musculus (Mouse) OX=10090 GN=Apip PE=1 SV=1	APIP	5	5	1.00271e-16	1	1	FALSE	24	24	24	24	-0.0471589
P17182;P17183;P21550	P17182;P17183;P21550	>sp|P17182|ENOA_MOUSE Alpha-enolase OS=Mus musculus (Mouse) OX=10090 GN=Eno1 PE=1 SV=3;>sp|P17183|ENOG_MOUSE Gamma-enolase OS=Mus musculus (Mouse) OX=10090 GN=Eno2 PE=1 SV=2;>sp|P21550|ENOB_MOUSE Beta-enolase OS=Mus musculus (Mouse) OX=10090 GN=Eno3 PE=1 SV=3	ENO1;ENO2;ENO3	1	1	0	1	1	FALSE	5	5	5	5	-0.046026
P17182	P17182	>sp|P17182|ENOA_MOUSE Alpha-enolase OS=Mus musculus (Mouse) OX=10090 GN=Eno1 PE=1 SV=3	ENO1	21	19	-0.0284113	0.376895	0.788336	FALSE	101	100	101	100	0.0057678
P49769	P49769	>sp|P49769|PSN1_MOUSE Presenilin-1 OS=Mus musculus (Mouse) OX=10090 GN=Psen1 PE=1 SV=1	PSEN1	4	4	-3.0321e-19	1	1	FALSE	19	19	19	19	-0.0430529
Q3UPH7	Q3UPH7	>sp|Q3UPH7|ARH40_MOUSE Rho guanine nucleotide exchange factor 40 OS=Mus musculus (Mouse) OX=10090 GN=Arhgef40 PE=1 SV=1	ARHGEF40	11	10	-0.0298517	0.416751	0.849779	FALSE	48	48	48	48	-0.046359
Q8K354	Q8K354	>sp|Q8K354|CBR3_MOUSE Carbonyl reductase [NADPH] 3 OS=Mus musculus (Mouse) OX=10090 GN=Cbr3 PE=1 SV=1	CBR3	6	6	0.0882859	0.0302449	0.119074	FALSE	30	29	30	29	0.116653
P16332	P16332	>sp|P16332|MUTA_MOUSE Methylmalonyl-CoA mutase, mitochondrial OS=Mus musculus (Mouse) OX=10090 GN=Mmut PE=1 SV=2	MMUT	11	11	0.0507873	0.00620677	0.0336236	FALSE	54	54	54	54	-0.0433396
P58468	P58468	>sp|P58468|F207A_MOUSE Protein FAM207A OS=Mus musculus (Mouse) OX=10090 GN=Fam207a PE=1 SV=1	FAM207A	3	2	2.57892e-18	1	1	FALSE	14	12	14	12	0.663273
O88325	O88325	>tr|O88325|O88325_MOUSE Alpha-N-acetylglucosaminidase OS=Mus musculus (Mouse) OX=10090 GN=Naglu PE=1 SV=1	NAGLU	11	11	-0.0584879	0.306329	0.673641	FALSE	53	55	53	55	-0.225271
Q9QYC0	Q9QYC0	>sp|Q9QYC0|ADDA_MOUSE Alpha-adducin OS=Mus musculus (Mouse) OX=10090 GN=Add1 PE=1 SV=2	ADD1	20	19	0	1	1	FALSE	99	96	99	96	0.10663
P13439	P13439	>sp|P13439|UMPS_MOUSE Uridine 5'-monophosphate synthase OS=Mus musculus (Mouse) OX=10090 GN=Umps PE=1 SV=3	UMPS	11	11	0.0386967	0.130682	0.361676	FALSE	55	54	55	54	0.0453555
P45952	P45952	>sp|P45952|ACADM_MOUSE Medium-chain specific acyl-CoA dehydrogenase, mitochondrial OS=Mus musculus (Mouse) OX=10090 GN=Acadm PE=1 SV=1	ACADM	17	17	0	1	1	FALSE	83	84	83	84	-0.101528
Q505D7	Q505D7	>sp|Q505D7|OPA3_MOUSE Optic atrophy 3 protein homolog OS=Mus musculus (Mouse) OX=10090 GN=Opa3 PE=1 SV=1	OPA3	2	2	0.237527	2.3444e-08	8.75933e-07	FALSE	10	10	10	10	-0.0450912
Q8CGF6	Q8CGF6	>sp|Q8CGF6|WDR47_MOUSE WD repeat-containing protein 47 OS=Mus musculus (Mouse) OX=10090 GN=Wdr47 PE=1 SV=2	WDR47	19	17	0.0549141	0.0235347	0.0972258	FALSE	91	88	91	88	0.119294
Q8BWF0	Q8BWF0	>sp|Q8BWF0|SSDH_MOUSE Succinate-semialdehyde dehydrogenase, mitochondrial OS=Mus musculus (Mouse) OX=10090 GN=Aldh5a1 PE=1 SV=1	ALDH5A1	18	17	0.183938	2.82475e-05	0.000396505	FALSE	89	86	89	86	0.124555
Q9CQW1	Q9CQW1	>sp|Q9CQW1|YKT6_MOUSE Synaptobrevin homolog YKT6 OS=Mus musculus (Mouse) OX=10090 GN=Ykt6 PE=1 SV=1	YKT6	10	9	-1.86288e-18	1	1	FALSE	47	50	47	50	-0.344124
P48678	P48678	>sp|P48678|LMNA_MOUSE Prelamin-A/C OS=Mus musculus (Mouse) OX=10090 GN=Lmna PE=1 SV=2	LMNA	35	31	-0.00897716	0.649283	1	FALSE	163	165	163	165	-0.104161
P51881	P51881	>sp|P51881|ADT2_MOUSE ADP/ATP translocase 2 OS=Mus musculus (Mouse) OX=10090 GN=Slc25a5 PE=1 SV=3	SLC25A5	5	4	0.116605	0.000638591	0.00525631	FALSE	21	23	21	23	-0.473866
P48962	P48962	>sp|P48962|ADT1_MOUSE ADP/ATP translocase 1 OS=Mus musculus (Mouse) OX=10090 GN=Slc25a4 PE=1 SV=4	SLC25A4	5	4	0.224587	0.00720535	0.0380028	FALSE	24	23	24	23	0.157835
Q9JHK4	Q9JHK4	>sp|Q9JHK4|PGTA_MOUSE Geranylgeranyl transferase type-2 subunit alpha OS=Mus musculus (Mouse) OX=10090 GN=Rabggta PE=1 SV=1	RABGGTA	12	10	0.05227	0.0784288	0.246407	FALSE	58	58	58	58	-0.0437271
Q8VDP4	Q8VDP4	>sp|Q8VDP4|CCAR2_MOUSE Cell cycle and apoptosis regulator protein 2 OS=Mus musculus (Mouse) OX=10090 GN=Ccar2 PE=1 SV=2	CCAR2	15	13	0.0550667	0.00473164	0.0270755	FALSE	73	67	73	67	0.374225
P52760	P52760	>sp|P52760|RIDA_MOUSE 2-iminobutanoate/2-iminopropanoate deaminase OS=Mus musculus (Mouse) OX=10090 GN=Rida PE=1 SV=3	RIDA	8	6	0.187667	0.00205887	0.0138019	FALSE	36	37	36	37	-0.174061
P35123;Q8R5H1;Q99K46	P35123;Q8R5H1;Q99K46	>sp|P35123|UBP4_MOUSE Ubiquitin carboxyl-terminal hydrolase 4 OS=Mus musculus (Mouse) OX=10090 GN=Usp4 PE=1 SV=3;>sp|Q8R5H1|UBP15_MOUSE Ubiquitin carboxyl-terminal hydrolase 15 OS=Mus musculus (Mouse) OX=10090 GN=Usp15 PE=1 SV=1;>sp|Q99K46|UBP11_MOUSE Ubiquitin carboxyl-terminal hydrolase 11 OS=Mus musculus (Mouse) OX=10090 GN=Usp11 PE=1 SV=4	USP4;USP15;USP11	1	1	-0.0778612	0.17317	0.443069	FALSE	5	5	5	5	-0.046026
P29341	P29341	>sp|P29341|PABP1_MOUSE Polyadenylate-binding protein 1 OS=Mus musculus (Mouse) OX=10090 GN=Pabpc1 PE=1 SV=2	PABPC1	31	28	0.0388081	0.147953	0.396379	FALSE	153	148	153	148	0.118633
P62874	P62874	>sp|P62874|GBB1_MOUSE Guanine nucleotide-binding protein G(I)/G(S)/G(T) subunit beta-1 OS=Mus musculus (Mouse) OX=10090 GN=Gnb1 PE=1 SV=3	GNB1	3	3	0.0259048	0.473897	0.934068	FALSE	15	15	15	15	-0.0447409
P62880	P62880	>sp|P62880|GBB2_MOUSE Guanine nucleotide-binding protein G(I)/G(S)/G(T) subunit beta-2 OS=Mus musculus (Mouse) OX=10090 GN=Gnb2 PE=1 SV=3	GNB2	3	3	-2.53814e-18	1	1	FALSE	15	15	15	15	-0.0447409
Q61595	Q61595	>sp|Q61595|KTN1_MOUSE Kinectin OS=Mus musculus (Mouse) OX=10090 GN=Ktn1 PE=1 SV=1	KTN1	33	28	-1.46689e-16	1	1	FALSE	156	154	156	154	0.0199952
Q6PIC6	Q6PIC6	>sp|Q6PIC6|AT1A3_MOUSE Sodium/potassium-transporting ATPase subunit alpha-3 OS=Mus musculus (Mouse) OX=10090 GN=Atp1a3 PE=1 SV=1	ATP1A3	26	23	0.167405	0.0143175	0.0656608	FALSE	119	124	119	124	-0.245638
Q8VDN2	Q8VDN2	>sp|Q8VDN2|AT1A1_MOUSE Sodium/potassium-transporting ATPase subunit alpha-1 OS=Mus musculus (Mouse) OX=10090 GN=Atp1a1 PE=1 SV=1	ATP1A1	27	24	-0.0111802	0.552748	1	FALSE	131	127	131	127	0.108257
P61164;Q8R5C5	P61164;Q8R5C5	>sp|P61164|ACTZ_MOUSE Alpha-centractin OS=Mus musculus (Mouse) OX=10090 GN=Actr1a PE=1 SV=1;>sp|Q8R5C5|ACTY_MOUSE Beta-centractin OS=Mus musculus (Mouse) OX=10090 GN=Actr1b PE=1 SV=1	ACTR1A;ACTR1B	9	9	1.91085e-15	1	1	FALSE	44	45	44	45	-0.152431
Q9ET80	Q9ET80	>sp|Q9ET80|JPH1_MOUSE Junctophilin-1 OS=Mus musculus (Mouse) OX=10090 GN=Jph1 PE=1 SV=1	JPH1	2	1	0	1	1	FALSE	6	6	6	6	-0.052007
Q8BFZ9	Q8BFZ9	>sp|Q8BFZ9|ERLN2_MOUSE Erlin-2 OS=Mus musculus (Mouse) OX=10090 GN=Erlin2 PE=1 SV=1	ERLIN2	14	14	0	1	1	FALSE	70	70	70	70	-0.0441442
Q8C561	Q8C561	>sp|Q8C561|LMBD2_MOUSE G-protein coupled receptor-associated protein LMBRD2 OS=Mus musculus (Mouse) OX=10090 GN=Lmbrd2 PE=1 SV=1	LMBRD2	4	3	-0.121576	0.000759169	0.00605904	FALSE	17	19	17	19	-0.56577
O70589	O70589	>sp|O70589|CSKP_MOUSE Peripheral plasma membrane protein CASK OS=Mus musculus (Mouse) OX=10090 GN=Cask PE=1 SV=2	CASK	22	21	-0.0919471	0.00581938	0.0318188	FALSE	108	108	108	108	-0.0438388
Q9CPX6	Q9CPX6	>sp|Q9CPX6|ATG3_MOUSE Ubiquitin-like-conjugating enzyme ATG3 OS=Mus musculus (Mouse) OX=10090 GN=Atg3 PE=1 SV=1	ATG3	6	6	0	1	1	FALSE	30	29	30	29	0.117468
Q9QYR9	Q9QYR9	>sp|Q9QYR9|ACOT2_MOUSE Acyl-coenzyme A thioesterase 2, mitochondrial OS=Mus musculus (Mouse) OX=10090 GN=Acot2 PE=1 SV=2	ACOT2	5	5	-0.0688115	0.041443	0.151719	FALSE	25	25	25	25	-0.0444446
Q61234	Q61234	>sp|Q61234|SNTA1_MOUSE Alpha-1-syntrophin OS=Mus musculus (Mouse) OX=10090 GN=Snta1 PE=1 SV=1	SNTA1	7	7	-0.145937	0.00256039	0.0165665	FALSE	34	33	34	33	0.101805
P63024;P63044	P63024;P63044	>sp|P63024|VAMP3_MOUSE Vesicle-associated membrane protein 3 OS=Mus musculus (Mouse) OX=10090 GN=Vamp3 PE=1 SV=1;>sp|P63044|VAMP2_MOUSE Vesicle-associated membrane protein 2 OS=Mus musculus (Mouse) OX=10090 GN=Vamp2 PE=1 SV=2	VAMP3;VAMP2	2	2	-3.24052e-18	1	1	FALSE	10	10	10	10	-0.0450912
Q99JX3	Q99JX3	>sp|Q99JX3|GORS2_MOUSE Golgi reassembly-stacking protein 2 OS=Mus musculus (Mouse) OX=10090 GN=Gorasp2 PE=1 SV=3	GORASP2	5	5	0.0315077	0.341476	0.729874	FALSE	25	25	25	25	-0.0444446
Q8BK64	Q8BK64	>sp|Q8BK64|AHSA1_MOUSE Activator of 90 kDa heat shock protein ATPase homolog 1 OS=Mus musculus (Mouse) OX=10090 GN=Ahsa1 PE=1 SV=2	AHSA1	16	14	0.03017	0.0194371	0.0831833	FALSE	75	77	75	77	-0.172237
Q9R1V6	Q9R1V6	>sp|Q9R1V6|ADA22_MOUSE Disintegrin and metalloproteinase domain-containing protein 22 OS=Mus musculus (Mouse) OX=10090 GN=Adam22 PE=1 SV=2	ADAM22	9	6	0.212137	1.4625e-11	1.34303e-09	FALSE	36	40	36	40	-0.550068
Q8BFR5	Q8BFR5	>sp|Q8BFR5|EFTU_MOUSE Elongation factor Tu, mitochondrial OS=Mus musculus (Mouse) OX=10090 GN=Tufm PE=1 SV=1	TUFM	21	19	0.147216	0.000470761	0.00412593	FALSE	103	99	103	99	0.150103
P54822	P54822	>sp|P54822|PUR8_MOUSE Adenylosuccinate lyase OS=Mus musculus (Mouse) OX=10090 GN=Adsl PE=1 SV=2	ADSL	16	14	8.43637e-17	1	1	FALSE	77	74	77	74	0.149801
P22892	P22892	>sp|P22892|AP1G1_MOUSE AP-1 complex subunit gamma-1 OS=Mus musculus (Mouse) OX=10090 GN=Ap1g1 PE=1 SV=3	AP1G1	19	19	0	1	1	FALSE	94	92	94	92	0.0612633
Q6P5H2	Q6P5H2	>sp|Q6P5H2|NEST_MOUSE Nestin OS=Mus musculus (Mouse) OX=10090 GN=Nes PE=1 SV=1	NES	41	37	-0.217427	0.0188244	0.0809704	FALSE	190	193	190	193	-0.122032
P05064	P05064	>sp|P05064|ALDOA_MOUSE Fructose-bisphosphate aldolase A OS=Mus musculus (Mouse) OX=10090 GN=Aldoa PE=1 SV=2	ALDOA	20	18	-0.102717	0.0210436	0.0889103	FALSE	98	96	98	96	0.0572977
Q8R1U1	Q8R1U1	>sp|Q8R1U1|COG4_MOUSE Conserved oligomeric Golgi complex subunit 4 OS=Mus musculus (Mouse) OX=10090 GN=Cog4 PE=1 SV=1	COG4	9	9	1.52193e-14	0.999999	1	FALSE	45	45	45	45	-0.0442385
Q9CTY5	Q9CTY5	>sp|Q9CTY5|MICU3_MOUSE Calcium uptake protein 3, mitochondrial OS=Mus musculus (Mouse) OX=10090 GN=Micu3 PE=2 SV=2	MICU3	15	14	0.0238555	0.539604	1	FALSE	72	69	72	69	0.162509
P62869	P62869	>sp|P62869|ELOB_MOUSE Elongin-B OS=Mus musculus (Mouse) OX=10090 GN=Elob PE=1 SV=1	ELOB	6	6	5.73298e-19	1	1	FALSE	29	29	29	29	-0.0446736
Q922B2	Q922B2	>sp|Q922B2|SYDC_MOUSE Aspartate--tRNA ligase, cytoplasmic OS=Mus musculus (Mouse) OX=10090 GN=Dars PE=1 SV=2	DARS	26	24	-0.054798	8.37776e-05	0.00100559	FALSE	123	122	123	122	-0.0041489
Q05920	Q05920	>sp|Q05920|PYC_MOUSE Pyruvate carboxylase, mitochondrial OS=Mus musculus (Mouse) OX=10090 GN=Pc PE=1 SV=1	PC	34	34	-4.95568e-17	1	1	FALSE	168	169	168	169	-0.073135
Q8C1Y8	Q8C1Y8	>sp|Q8C1Y8|CCZ1_MOUSE Vacuolar fusion protein CCZ1 homolog OS=Mus musculus (Mouse) OX=10090 GN=Ccz1 PE=1 SV=1	CCZ1	11	9	-1.0869e-13	0.999999	1	FALSE	49	51	49	51	-0.23624
P53811	P53811	>sp|P53811|PIPNB_MOUSE Phosphatidylinositol transfer protein beta isoform OS=Mus musculus (Mouse) OX=10090 GN=Pitpnb PE=1 SV=2	PITPNB	5	5	0.043233	0.0724445	0.232043	FALSE	25	25	25	25	-0.0444446
P61971	P61971	>sp|P61971|NTF2_MOUSE Nuclear transport factor 2 OS=Mus musculus (Mouse) OX=10090 GN=Nutf2 PE=1 SV=1	NUTF2	2	2	0.126969	0.0024006	0.0157059	FALSE	10	10	10	10	-0.0450912
Q8BVF7	Q8BVF7	>sp|Q8BVF7|APH1A_MOUSE Gamma-secretase subunit APH-1A OS=Mus musculus (Mouse) OX=10090 GN=Aph1a PE=1 SV=2	APH1A	2	2	9.9378e-16	1	1	FALSE	10	10	10	10	-0.0450912
Q8BXN9	Q8BXN9	>sp|Q8BXN9|TM87A_MOUSE Transmembrane protein 87A OS=Mus musculus (Mouse) OX=10090 GN=Tmem87a PE=1 SV=1	TMEM87A	3	2	8.76857e-19	1	1	FALSE	11	15	11	15	-1.4616
Q6P4T2	Q6P4T2	>sp|Q6P4T2|U520_MOUSE U5 small nuclear ribonucleoprotein 200 kDa helicase OS=Mus musculus (Mouse) OX=10090 GN=Snrnp200 PE=1 SV=1	SNRNP200	54	43	-0.377288	7.76895e-09	3.3081e-07	TRUE	235	253	235	253	-0.405766
Q9Z0P4	Q9Z0P4	>sp|Q9Z0P4|PALM_MOUSE Paralemmin-1 OS=Mus musculus (Mouse) OX=10090 GN=Palm PE=1 SV=1	PALM	12	11	0.146832	0.0152627	0.0690811	FALSE	56	57	56	57	-0.130705
Q61879;Q8VDD5	Q61879;Q8VDD5	>sp|Q61879|MYH10_MOUSE Myosin-10 OS=Mus musculus (Mouse) OX=10090 GN=Myh10 PE=1 SV=2;>sp|Q8VDD5|MYH9_MOUSE Myosin-9 OS=Mus musculus (Mouse) OX=10090 GN=Myh9 PE=1 SV=4	MYH10;MYH9	7	5	-0.724274	0.00193247	0.0130811	FALSE	31	34	31	34	-0.486835
P97393	P97393	>sp|P97393|RHG05_MOUSE Rho GTPase-activating protein 5 OS=Mus musculus (Mouse) OX=10090 GN=Arhgap5 PE=1 SV=2	ARHGAP5	23	20	-0.0802754	0.000852903	0.00669306	FALSE	111	103	111	103	0.320961
Q9D8M3	Q9D8M3	>sp|Q9D8M3|HRG1_MOUSE Heme transporter HRG1 OS=Mus musculus (Mouse) OX=10090 GN=Slc48a1 PE=2 SV=1	SLC48A1	1	1	0	1	1	FALSE	5	5	5	5	-0.046026
Q3U1F9	Q3U1F9	>sp|Q3U1F9|PHAG1_MOUSE Phosphoprotein associated with glycosphingolipid-enriched microdomains 1 OS=Mus musculus (Mouse) OX=10090 GN=Pag1 PE=1 SV=2	PAG1	2	2	0.194515	0.01599	0.0716916	FALSE	9	9	9	9	-0.0439151
Q9EQ80	Q9EQ80	>sp|Q9EQ80|NIF3L_MOUSE NIF3-like protein 1 OS=Mus musculus (Mouse) OX=10090 GN=Nif3l1 PE=1 SV=4	NIF3L1	7	7	0.0319787	0.148106	0.39651	FALSE	34	34	34	34	-0.0430694
Q80TM9	Q80TM9	>sp|Q80TM9|NISCH_MOUSE Nischarin OS=Mus musculus (Mouse) OX=10090 GN=Nisch PE=1 SV=2	NISCH	20	16	-0.20947	1.32062e-05	0.000212807	FALSE	84	99	84	99	-0.844903
P61804	P61804	>sp|P61804|DAD1_MOUSE Dolichyl-diphosphooligosaccharide--protein glycosyltransferase subunit DAD1 OS=Mus musculus (Mouse) OX=10090 GN=Dad1 PE=1 SV=3	DAD1	3	3	0.690928	2.31986e-06	4.88453e-05	TRUE	15	15	15	15	-0.0447409
Q9D3A9	Q9D3A9	>sp|Q9D3A9|TTYH1_MOUSE Protein tweety homolog 1 OS=Mus musculus (Mouse) OX=10090 GN=Ttyh1 PE=1 SV=1	TTYH1	4	4	-0.0761516	0.0969493	0.289117	FALSE	20	20	20	20	-0.0445575
Q8BP56	Q8BP56	>sp|Q8BP56|PGGHG_MOUSE Protein-glucosylgalactosylhydroxylysine glucosidase OS=Mus musculus (Mouse) OX=10090 GN=Pgghg PE=1 SV=1	PGGHG	8	7	-0.0694345	0.148791	0.397859	FALSE	37	38	37	38	-0.171465
O35465	O35465	>sp|O35465|FKBP8_MOUSE Peptidyl-prolyl cis-trans isomerase FKBP8 OS=Mus musculus (Mouse) OX=10090 GN=Fkbp8 PE=1 SV=2	FKBP8	4	3	0.183359	0.00210999	0.0141073	FALSE	18	17	18	17	0.226306
P13597	P13597	>sp|P13597|ICAM1_MOUSE Intercellular adhesion molecule 1 OS=Mus musculus (Mouse) OX=10090 GN=Icam1 PE=1 SV=1	ICAM1	3	2	0	1	1	FALSE	15	13	15	13	0.615661
A2AHC3	A2AHC3	>sp|A2AHC3|CAMP1_MOUSE Calmodulin-regulated spectrin-associated protein 1 OS=Mus musculus (Mouse) OX=10090 GN=Camsap1 PE=1 SV=1	CAMSAP1	18	17	0.0246561	0.262878	0.604239	FALSE	89	87	89	87	0.0667363
P39447	P39447	>sp|P39447|ZO1_MOUSE Tight junction protein ZO-1 OS=Mus musculus (Mouse) OX=10090 GN=Tjp1 PE=1 SV=2	TJP1	38	36	-0.197909	0.00658235	0.035257	FALSE	180	187	180	187	-0.231604
Q9JIA7	Q9JIA7	>sp|Q9JIA7|SPHK2_MOUSE Sphingosine kinase 2 OS=Mus musculus (Mouse) OX=10090 GN=Sphk2 PE=1 SV=2	SPHK2	8	7	-5.99489e-16	1	1	FALSE	36	38	36	38	-0.304852
Q9CQ06	Q9CQ06	>sp|Q9CQ06|RM24_MOUSE 39S ribosomal protein L24, mitochondrial OS=Mus musculus (Mouse) OX=10090 GN=Mrpl24 PE=1 SV=1	MRPL24	5	5	0.227319	9.39251e-06	0.000156651	FALSE	25	25	25	25	-0.0444446
Q8R2K1	Q8R2K1	>sp|Q8R2K1|FUCM_MOUSE Fucose mutarotase OS=Mus musculus (Mouse) OX=10090 GN=Fuom PE=1 SV=1	FUOM	2	2	-0.0490175	0.134469	0.369874	FALSE	10	10	10	10	-0.0450912
Q8BG39	Q8BG39	>sp|Q8BG39|SV2B_MOUSE Synaptic vesicle glycoprotein 2B OS=Mus musculus (Mouse) OX=10090 GN=Sv2b PE=1 SV=1	SV2B	5	5	-0.476969	1.09977e-07	3.33961e-06	TRUE	24	24	24	24	-0.0436665
Q9CW46	Q9CW46	>sp|Q9CW46|RAVR1_MOUSE Ribonucleoprotein PTB-binding 1 OS=Mus musculus (Mouse) OX=10090 GN=Raver1 PE=1 SV=2	RAVER1	5	4	-3.042e-18	1	1	FALSE	22	19	22	19	0.645613
Q8BKG3	Q8BKG3	>sp|Q8BKG3|PTK7_MOUSE Inactive tyrosine-protein kinase 7 OS=Mus musculus (Mouse) OX=10090 GN=Ptk7 PE=1 SV=1	PTK7	20	17	6.93389e-17	1	1	FALSE	96	90	96	90	0.2705
O08749	O08749	>sp|O08749|DLDH_MOUSE Dihydrolipoyl dehydrogenase, mitochondrial OS=Mus musculus (Mouse) OX=10090 GN=Dld PE=1 SV=2	DLD	14	13	0.108464	6.75013e-05	0.000836576	FALSE	68	70	68	70	-0.185026
Q8BWY4	Q8BWY4	>sp|Q8BWY4|MBLC1_MOUSE Metallo-beta-lactamase domain-containing protein 1 OS=Mus musculus (Mouse) OX=10090 GN=Mblac1 PE=1 SV=1	MBLAC1	3	3	-0.0982567	0.00468826	0.0268676	FALSE	15	15	15	15	-0.0447409
Q8BGF9	Q8BGF9	>sp|Q8BGF9|S2544_MOUSE Solute carrier family 25 member 44 OS=Mus musculus (Mouse) OX=10090 GN=Slc25a44 PE=1 SV=1	SLC25A44	4	4	0.045689	0.280064	0.63399	FALSE	20	18	20	18	0.44854
P97351	P97351	>sp|P97351|RS3A_MOUSE 40S ribosomal protein S3a OS=Mus musculus (Mouse) OX=10090 GN=Rps3a PE=1 SV=3	RPS3A	13	13	3.74674e-17	1	1	FALSE	64	64	64	64	-0.044295
P62242	P62242	>sp|P62242|RS8_MOUSE 40S ribosomal protein S8 OS=Mus musculus (Mouse) OX=10090 GN=Rps8 PE=1 SV=2	RPS8	8	8	0.0356027	0.154046	0.407827	FALSE	40	40	40	40	-0.0442712
P62334	P62334	>sp|P62334|PRS10_MOUSE 26S proteasome regulatory subunit 10B OS=Mus musculus (Mouse) OX=10090 GN=Psmc6 PE=1 SV=1	PSMC6	20	19	0	1	1	FALSE	97	96	97	96	0.00780323
Q8K2Q7	Q8K2Q7	>sp|Q8K2Q7|BROX_MOUSE BRO1 domain-containing protein BROX OS=Mus musculus (Mouse) OX=10090 GN=Brox PE=1 SV=1	BROX	6	6	0.149017	7.14115e-06	0.00012259	FALSE	30	30	30	30	-0.0443681
P23819	P23819	>sp|P23819|GRIA2_MOUSE Glutamate receptor 2 OS=Mus musculus (Mouse) OX=10090 GN=Gria2 PE=1 SV=3	GRIA2	26	25	-8.08585e-16	1	1	FALSE	128	129	128	129	-0.081959
Q9Z2W9	Q9Z2W9	>sp|Q9Z2W9|GRIA3_MOUSE Glutamate receptor 3 OS=Mus musculus (Mouse) OX=10090 GN=Gria3 PE=1 SV=2	GRIA3	6	5	1.52321e-19	1	1	FALSE	26	28	26	28	-0.398179
Q7TSJ2	Q7TSJ2	>sp|Q7TSJ2|MAP6_MOUSE Microtubule-associated protein 6 OS=Mus musculus (Mouse) OX=10090 GN=Map6 PE=1 SV=2	MAP6	41	39	5.24975e-18	1	1	FALSE	198	198	198	198	-0.0437344
B2RRE7	B2RRE7	>sp|B2RRE7|OTUD4_MOUSE OTU domain-containing protein 4 OS=Mus musculus (Mouse) OX=10090 GN=Otud4 PE=1 SV=1	OTUD4	7	7	5.8719e-17	1	1	FALSE	32	34	32	34	-0.339136
Q9CY18	Q9CY18	>sp|Q9CY18|SNX7_MOUSE Sorting nexin-7 OS=Mus musculus (Mouse) OX=10090 GN=Snx7 PE=1 SV=1	SNX7	8	7	-0.151685	0.0131824	0.0616269	FALSE	38	38	38	38	-0.0425571
P58021	P58021	>sp|P58021|TM9S2_MOUSE Transmembrane 9 superfamily member 2 OS=Mus musculus (Mouse) OX=10090 GN=Tm9sf2 PE=1 SV=1	TM9SF2	6	5	0	1	1	FALSE	28	27	28	27	0.131434
Q6PIE5	Q6PIE5	>sp|Q6PIE5|AT1A2_MOUSE Sodium/potassium-transporting ATPase subunit alpha-2 OS=Mus musculus (Mouse) OX=10090 GN=Atp1a2 PE=1 SV=1	ATP1A2	27	22	0	1	1	FALSE	132	122	132	122	0.341545
Q8VE62	Q8VE62	>sp|Q8VE62|PAIP1_MOUSE Polyadenylate-binding protein-interacting protein 1 OS=Mus musculus (Mouse) OX=10090 GN=Paip1 PE=1 SV=1	PAIP1	10	9	-0.00553658	0.672286	1	FALSE	46	45	46	45	0.0611241
Q8VE22	Q8VE22	>sp|Q8VE22|RT23_MOUSE 28S ribosomal protein S23, mitochondrial OS=Mus musculus (Mouse) OX=10090 GN=Mrps23 PE=1 SV=1	MRPS23	6	5	0.216701	5.34309e-06	9.76619e-05	FALSE	30	28	30	28	0.284212
P10649	P10649	>sp|P10649|GSTM1_MOUSE Glutathione S-transferase Mu 1 OS=Mus musculus (Mouse) OX=10090 GN=Gstm1 PE=1 SV=2	GSTM1	21	20	3.15479e-17	1	1	FALSE	100	101	100	101	-0.0928501
Q69Z98	Q69Z98	>sp|Q69Z98|BRSK2_MOUSE Serine/threonine-protein kinase BRSK2 OS=Mus musculus (Mouse) OX=10090 GN=Brsk2 PE=1 SV=2	BRSK2	13	12	-0.0239142	0.217593	0.52479	FALSE	62	60	62	60	0.114955
Q5RJI5	Q5RJI5	>sp|Q5RJI5|BRSK1_MOUSE Serine/threonine-protein kinase BRSK1 OS=Mus musculus (Mouse) OX=10090 GN=Brsk1 PE=1 SV=1	BRSK1	10	10	-1.12396e-15	1	1	FALSE	48	49	48	49	-0.143402
Q99KL7	Q99KL7	>sp|Q99KL7|RAB28_MOUSE Ras-related protein Rab-28 OS=Mus musculus (Mouse) OX=10090 GN=Rab28 PE=1 SV=1	RAB28	2	2	0	1	1	FALSE	10	10	10	10	-0.0450912
Q91XL9	Q91XL9	>sp|Q91XL9|OSBL1_MOUSE Oxysterol-binding protein-related protein 1 OS=Mus musculus (Mouse) OX=10090 GN=Osbpl1a PE=1 SV=2	OSBPL1A	12	12	-0.140265	1.46405e-07	4.29193e-06	FALSE	58	56	58	56	0.124354
Q6P9R2	Q6P9R2	>sp|Q6P9R2|OXSR1_MOUSE Serine/threonine-protein kinase OSR1 OS=Mus musculus (Mouse) OX=10090 GN=Oxsr1 PE=1 SV=1	OXSR1	8	7	-0.0380628	0.0362466	0.1367	FALSE	37	37	37	37	-0.0432683
Q99KH8;Q9Z2W1	Q99KH8;Q9Z2W1	>sp|Q99KH8|STK24_MOUSE Serine/threonine-protein kinase 24 OS=Mus musculus (Mouse) OX=10090 GN=Stk24 PE=1 SV=1;>sp|Q9Z2W1|STK25_MOUSE Serine/threonine-protein kinase 25 OS=Mus musculus (Mouse) OX=10090 GN=Stk25 PE=1 SV=2	STK24;STK25	4	4	0.0342562	0.304746	0.671127	FALSE	20	19	20	19	0.197977
Q5IRJ6	Q5IRJ6	>sp|Q5IRJ6|ZNT9_MOUSE Zinc transporter 9 OS=Mus musculus (Mouse) OX=10090 GN=Slc30a9 PE=1 SV=2	SLC30A9	8	8	0.116338	4.36724e-05	0.000572927	FALSE	39	39	39	39	-0.0433593
Q9EQ08	Q9EQ08	>tr|Q9EQ08|Q9EQ08_MOUSE Heparan N-sulfatase OS=Mus musculus (Mouse) OX=10090 GN=Sgsh PE=1 SV=1	SGSH	3	3	-1.23552e-19	1	1	FALSE	15	15	15	15	-0.0447409
P68037	P68037	>sp|P68037|UB2L3_MOUSE Ubiquitin-conjugating enzyme E2 L3 OS=Mus musculus (Mouse) OX=10090 GN=Ube2l3 PE=1 SV=1	UBE2L3	5	5	-2.98489e-15	1	1	FALSE	25	24	25	24	0.150505
Q9ERA6	Q9ERA6	>sp|Q9ERA6|TFP11_MOUSE Tuftelin-interacting protein 11 OS=Mus musculus (Mouse) OX=10090 GN=Tfip11 PE=1 SV=1	TFIP11	7	6	-5.28691e-17	1	1	FALSE	29	29	29	29	-0.0469685
P39087	P39087	>sp|P39087|GRIK2_MOUSE Glutamate receptor ionotropic, kainate 2 OS=Mus musculus (Mouse) OX=10090 GN=Grik2 PE=1 SV=4	GRIK2	6	5	-0.199052	4.53398e-06	8.59652e-05	FALSE	27	25	27	25	0.322166
Q91V41	Q91V41	>sp|Q91V41|RAB14_MOUSE Ras-related protein Rab-14 OS=Mus musculus (Mouse) OX=10090 GN=Rab14 PE=1 SV=3	RAB14	12	12	2.56799e-18	1	1	FALSE	58	58	58	58	-0.0428625
Q6PHU5	Q6PHU5	>sp|Q6PHU5|SORT_MOUSE Sortilin OS=Mus musculus (Mouse) OX=10090 GN=Sort1 PE=1 SV=1	SORT1	12	11	-0.110494	8.05084e-05	0.000977126	FALSE	56	56	56	56	-0.0428024
P62897	P62897	>sp|P62897|CYC_MOUSE Cytochrome c, somatic OS=Mus musculus (Mouse) OX=10090 GN=Cycs PE=1 SV=2	CYCS	7	7	0.355275	4.13944e-10	2.54442e-08	TRUE	35	35	35	35	-0.0443129
P07901;P11499	P07901;P11499	>sp|P07901|HS90A_MOUSE Heat shock protein HSP 90-alpha OS=Mus musculus (Mouse) OX=10090 GN=Hsp90aa1 PE=1 SV=4;>sp|P11499|HS90B_MOUSE Heat shock protein HSP 90-beta OS=Mus musculus (Mouse) OX=10090 GN=Hsp90ab1 PE=1 SV=3	HSP90AA1;HSP90AB1	11	11	0	1	1	FALSE	55	55	55	55	-0.0441907
Q5SUQ9	Q5SUQ9	>sp|Q5SUQ9|CTC1_MOUSE CST complex subunit CTC1 OS=Mus musculus (Mouse) OX=10090 GN=Ctc1 PE=1 SV=2	CTC1	2	2	0.0663411	0.0836895	0.258985	FALSE	10	10	10	10	-0.0450912
Q99J39	Q99J39	>sp|Q99J39|DCMC_MOUSE Malonyl-CoA decarboxylase, mitochondrial OS=Mus musculus (Mouse) OX=10090 GN=Mlycd PE=1 SV=1	MLYCD	9	7	1.71036e-16	1	1	FALSE	40	39	40	39	0.0768862
Q8K3K8	Q8K3K8	>sp|Q8K3K8|OPTN_MOUSE Optineurin OS=Mus musculus (Mouse) OX=10090 GN=Optn PE=1 SV=1	OPTN	2	2	0.0659781	0.183733	0.462641	FALSE	9	10	9	10	-0.516079
Q9D8Y0	Q9D8Y0	>sp|Q9D8Y0|EFHD2_MOUSE EF-hand domain-containing protein D2 OS=Mus musculus (Mouse) OX=10090 GN=Efhd2 PE=1 SV=1	EFHD2	9	9	-0.0789706	0.0591724	0.198509	FALSE	45	45	45	45	-0.0442385
Q8C3I8	Q8C3I8	>sp|Q8C3I8|HGH1_MOUSE Protein HGH1 homolog OS=Mus musculus (Mouse) OX=10090 GN=Hgh1 PE=1 SV=1	HGH1	6	6	-0.0310261	0.188998	0.472912	FALSE	30	30	30	30	-0.0443681
E9Q842	E9Q842	>tr|E9Q842|E9Q842_MOUSE Calponin-homology (CH) domain-containing protein OS=Mus musculus (Mouse) OX=10090 GN=Nav2 PE=1 SV=1	NAV2	2	2	-0.0805014	0.0542353	0.185373	FALSE	10	9	10	9	0.425465
Q8BQZ4	Q8BQZ4	>sp|Q8BQZ4|RLGPB_MOUSE Ral GTPase-activating protein subunit beta OS=Mus musculus (Mouse) OX=10090 GN=Ralgapb PE=1 SV=2	RALGAPB	17	14	-0.0438813	0.0151033	0.0684432	FALSE	77	79	77	79	-0.168892
Q9JJ28	Q9JJ28	>sp|Q9JJ28|FLII_MOUSE Protein flightless-1 homolog OS=Mus musculus (Mouse) OX=10090 GN=Flii PE=1 SV=1	FLII	16	14	-0.0206431	0.3276	0.707355	FALSE	75	75	75	75	-0.0451775
Q8BIJ6	Q8BIJ6	>sp|Q8BIJ6|SYIM_MOUSE Isoleucine--tRNA ligase, mitochondrial OS=Mus musculus (Mouse) OX=10090 GN=Iars2 PE=1 SV=1	IARS2	21	18	0.111721	1.60296e-12	1.85118e-10	FALSE	100	97	100	97	0.105049
Q9JHW2	Q9JHW2	>sp|Q9JHW2|NIT2_MOUSE Omega-amidase NIT2 OS=Mus musculus (Mouse) OX=10090 GN=Nit2 PE=1 SV=1	NIT2	7	7	0	1	1	FALSE	34	34	34	34	-0.0437534
Q61879	Q61879	>sp|Q61879|MYH10_MOUSE Myosin-10 OS=Mus musculus (Mouse) OX=10090 GN=Myh10 PE=1 SV=2	MYH10	102	86	-0.722208	2.43808e-06	5.09125e-05	TRUE	445	482	445	482	-0.437129
Q8BMS1	Q8BMS1	>sp|Q8BMS1|ECHA_MOUSE Trifunctional enzyme subunit alpha, mitochondrial OS=Mus musculus (Mouse) OX=10090 GN=Hadha PE=1 SV=1	HADHA	24	23	6.91666e-18	1	1	FALSE	118	118	118	118	-0.0442008
Q9Z1W9	Q9Z1W9	>sp|Q9Z1W9|STK39_MOUSE STE20/SPS1-related proline-alanine-rich protein kinase OS=Mus musculus (Mouse) OX=10090 GN=Stk39 PE=1 SV=1	STK39	7	7	0.0507514	0.025654	0.104063	FALSE	34	32	34	32	0.247243
Q9D0R2	Q9D0R2	>sp|Q9D0R2|SYTC_MOUSE Threonine--tRNA ligase 1, cytoplasmic OS=Mus musculus (Mouse) OX=10090 GN=Tars1 PE=1 SV=2	TARS1	22	20	-0.0482868	0.0757436	0.239551	FALSE	106	104	106	104	0.0485398
Q9D0F9	Q9D0F9	>sp|Q9D0F9|PGM1_MOUSE Phosphoglucomutase-1 OS=Mus musculus (Mouse) OX=10090 GN=Pgm1 PE=1 SV=4	PGM1	27	25	-0.0727229	5.24655e-06	9.63596e-05	FALSE	127	130	127	130	-0.158241
Q7TN98	Q7TN98	>sp|Q7TN98|CPEB4_MOUSE Cytoplasmic polyadenylation element-binding protein 4 OS=Mus musculus (Mouse) OX=10090 GN=Cpeb4 PE=1 SV=1	CPEB4	3	2	0.163996	0.00743014	0.0386676	FALSE	12	14	12	14	-0.751945
P97449	P97449	>sp|P97449|AMPN_MOUSE Aminopeptidase N OS=Mus musculus (Mouse) OX=10090 GN=Anpep PE=1 SV=4	ANPEP	13	1	0	1	1	FALSE	39	37	39	37	0.195788
A0A0J9YUD5	A0A0J9YUD5	>tr|A0A0J9YUD5|A0A0J9YUD5_MOUSE Nucleoporin 205 OS=Mus musculus (Mouse) OX=10090 GN=Nup205 PE=1 SV=1	NUP205	24	21	-0.0151958	0.508212	0.986149	FALSE	114	114	114	114	-0.0443527
Q8K009	Q8K009	>sp|Q8K009|AL1L2_MOUSE Mitochondrial 10-formyltetrahydrofolate dehydrogenase OS=Mus musculus (Mouse) OX=10090 GN=Aldh1l2 PE=1 SV=2	ALDH1L2	18	17	-7.04116e-17	1	1	FALSE	89	86	89	86	0.123836
Q8R0Y6	Q8R0Y6	>sp|Q8R0Y6|AL1L1_MOUSE Cytosolic 10-formyltetrahydrofolate dehydrogenase OS=Mus musculus (Mouse) OX=10090 GN=Aldh1l1 PE=1 SV=1	ALDH1L1	34	31	-3.42285e-18	1	1	FALSE	161	163	161	163	-0.105681
Q61001	Q61001	>sp|Q61001|LAMA5_MOUSE Laminin subunit alpha-5 OS=Mus musculus (Mouse) OX=10090 GN=Lama5 PE=1 SV=4	LAMA5	16	7	-0.2438	0.00324604	0.0200011	FALSE	54	68	54	68	-1.1642
Q3UDW8	Q3UDW8	>sp|Q3UDW8|HGNAT_MOUSE Heparan-alpha-glucosaminide N-acetyltransferase OS=Mus musculus (Mouse) OX=10090 GN=Hgsnat PE=1 SV=2	HGSNAT	3	3	0	1	1	FALSE	15	15	15	15	-0.0447409
Q9Z1X4	Q9Z1X4	>sp|Q9Z1X4|ILF3_MOUSE Interleukin enhancer-binding factor 3 OS=Mus musculus (Mouse) OX=10090 GN=Ilf3 PE=1 SV=2	ILF3	23	21	0.0803064	0.020931	0.0884898	FALSE	113	109	113	109	0.132402
P18653;P18654;Q9WUT3	P18653;P18654;Q9WUT3	>sp|P18653|KS6A1_MOUSE Ribosomal protein S6 kinase alpha-1 OS=Mus musculus (Mouse) OX=10090 GN=Rps6ka1 PE=1 SV=1;>sp|P18654|KS6A3_MOUSE Ribosomal protein S6 kinase alpha-3 OS=Mus musculus (Mouse) OX=10090 GN=Rps6ka3 PE=1 SV=2;>sp|Q9WUT3|KS6A2_MOUSE Ribosomal protein S6 kinase alpha-2 OS=Mus musculus (Mouse) OX=10090 GN=Rps6ka2 PE=1 SV=1	RPS6KA1;RPS6KA3;RPS6KA2	4	3	-3.17889e-18	1	1	FALSE	17	19	17	19	-0.567411
Q9R0Q4	Q9R0Q4	>sp|Q9R0Q4|MO4L2_MOUSE Mortality factor 4-like protein 2 OS=Mus musculus (Mouse) OX=10090 GN=Morf4l2 PE=1 SV=1	MORF4L2	2	2	3.84612e-18	1	1	FALSE	10	9	10	9	0.423019
Q60710	Q60710	>sp|Q60710|SAMH1_MOUSE Deoxynucleoside triphosphate triphosphohydrolase SAMHD1 OS=Mus musculus (Mouse) OX=10090 GN=Samhd1 PE=1 SV=3	SAMHD1	14	12	0	1	1	FALSE	63	61	63	61	0.113437
O89053	O89053	>sp|O89053|COR1A_MOUSE Coronin-1A OS=Mus musculus (Mouse) OX=10090 GN=Coro1a PE=1 SV=5	CORO1A	10	8	-0.113349	0.0491991	0.17265	FALSE	46	45	46	45	0.0622505
Q9CU62	Q9CU62	>sp|Q9CU62|SMC1A_MOUSE Structural maintenance of chromosomes protein 1A OS=Mus musculus (Mouse) OX=10090 GN=Smc1a PE=1 SV=4	SMC1A	28	25	-2.34953e-17	1	1	FALSE	131	130	131	130	-0.00663078
Q923G2	Q923G2	>sp|Q923G2|RPAB3_MOUSE DNA-directed RNA polymerases I, II, and III subunit RPABC3 OS=Mus musculus (Mouse) OX=10090 GN=Polr2h PE=1 SV=3	POLR2H	4	3	0.0846119	0.0291443	0.115697	FALSE	18	18	18	18	-0.0440597
Q8BJW5	Q8BJW5	>sp|Q8BJW5|NOL11_MOUSE Nucleolar protein 11 OS=Mus musculus (Mouse) OX=10090 GN=Nol11 PE=2 SV=1	NOL11	4	3	0	1	1	FALSE	19	18	19	18	0.20915
P20357	P20357	>sp|P20357|MTAP2_MOUSE Microtubule-associated protein 2 OS=Mus musculus (Mouse) OX=10090 GN=Map2 PE=1 SV=2	MAP2	72	69	-3.34865e-17	1	1	FALSE	356	352	356	352	0.0117546
Q9QXY6;Q9WVK4	Q9QXY6;Q9WVK4	>sp|Q9QXY6|EHD3_MOUSE EH domain-containing protein 3 OS=Mus musculus (Mouse) OX=10090 GN=Ehd3 PE=1 SV=2;>sp|Q9WVK4|EHD1_MOUSE EH domain-containing protein 1 OS=Mus musculus (Mouse) OX=10090 GN=Ehd1 PE=1 SV=1	EHD3;EHD1	9	9	0.0620499	0.0533526	0.183079	FALSE	45	45	45	45	-0.0442385
P60879	P60879	>sp|P60879|SNP25_MOUSE Synaptosomal-associated protein 25 OS=Mus musculus (Mouse) OX=10090 GN=Snap25 PE=1 SV=1	SNAP25	20	18	0	1	1	FALSE	94	92	94	92	0.0611898
B1AZI6	B1AZI6	>sp|B1AZI6|THOC2_MOUSE THO complex subunit 2 OS=Mus musculus (Mouse) OX=10090 GN=Thoc2 PE=1 SV=1	THOC2	12	10	0.0237007	0.433324	0.872601	FALSE	54	55	54	55	-0.133586
P63321	P63321	>sp|P63321|RALA_MOUSE Ras-related protein Ral-A OS=Mus musculus (Mouse) OX=10090 GN=Rala PE=1 SV=1	RALA	4	4	2.07455e-16	1	1	FALSE	20	20	20	20	-0.0445575
P62264	P62264	>sp|P62264|RS14_MOUSE 40S ribosomal protein S14 OS=Mus musculus (Mouse) OX=10090 GN=Rps14 PE=1 SV=3	RPS14	8	6	0	1	1	FALSE	36	38	36	38	-0.30272
Q921I1	Q921I1	>sp|Q921I1|TRFE_MOUSE Serotransferrin OS=Mus musculus (Mouse) OX=10090 GN=Tf PE=1 SV=1	TF	1	1	0	1	1	FALSE	5	5	5	5	-0.046026
Q812A2	Q812A2	>sp|Q812A2|SRGP3_MOUSE SLIT-ROBO Rho GTPase-activating protein 3 OS=Mus musculus (Mouse) OX=10090 GN=Srgap3 PE=1 SV=1	SRGAP3	39	36	0.0467295	0.0813908	0.253934	FALSE	187	184	187	184	0.0356921
Q3UDF0	Q3UDF0	>sp|Q3UDF0|GTR6_MOUSE Solute carrier family 2, facilitated glucose transporter member 6 OS=Mus musculus (Mouse) OX=10090 GN=Slc2a6 PE=1 SV=1	SLC2A6	3	3	0.0547685	0.1005	0.296903	FALSE	15	15	15	15	-0.0447409
O55137;Q8BWN8	O55137;Q8BWN8	>sp|O55137|ACOT1_MOUSE Acyl-coenzyme A thioesterase 1 OS=Mus musculus (Mouse) OX=10090 GN=Acot1 PE=1 SV=1;>sp|Q8BWN8|ACOT4_MOUSE Peroxisomal succinyl-coenzyme A thioesterase OS=Mus musculus (Mouse) OX=10090 GN=Acot4 PE=1 SV=1	ACOT1;ACOT4	2	2	-0.0119303	0.670184	1	FALSE	10	10	10	10	-0.0450912
Q80U49	Q80U49	>sp|Q80U49|C170B_MOUSE Centrosomal protein of 170 kDa protein B OS=Mus musculus (Mouse) OX=10090 GN=Cep170b PE=1 SV=2	CEP170B	21	15	0.113537	0.00406723	0.0239386	FALSE	98	84	98	84	0.708755
P97798	P97798	>sp|P97798|NEO1_MOUSE Neogenin OS=Mus musculus (Mouse) OX=10090 GN=Neo1 PE=1 SV=1	NEO1	24	22	-0.0047418	0.685514	1	FALSE	118	115	118	115	0.0816136
A2AJ15	A2AJ15	>sp|A2AJ15|MA1B1_MOUSE Endoplasmic reticulum mannosyl-oligosaccharide 1,2-alpha-mannosidase OS=Mus musculus (Mouse) OX=10090 GN=Man1b1 PE=1 SV=1	MAN1B1	10	8	0	1	1	FALSE	47	45	47	45	0.16493
Q8R059	Q8R059	>sp|Q8R059|GALE_MOUSE UDP-glucose 4-epimerase OS=Mus musculus (Mouse) OX=10090 GN=Gale PE=1 SV=1	GALE	4	4	-8.36693e-08	0.998808	1	FALSE	20	18	20	18	0.451626
Q02819	Q02819	>sp|Q02819|NUCB1_MOUSE Nucleobindin-1 OS=Mus musculus (Mouse) OX=10090 GN=Nucb1 PE=1 SV=2	NUCB1	22	21	1.30507e-17	1	1	FALSE	107	106	107	106	0.00186401
Q9QYH6	Q9QYH6	>sp|Q9QYH6|MAGD1_MOUSE Melanoma-associated antigen D1 OS=Mus musculus (Mouse) OX=10090 GN=Maged1 PE=1 SV=1	MAGED1	11	10	0	1	1	FALSE	55	51	55	51	0.322392
P35123	P35123	>sp|P35123|UBP4_MOUSE Ubiquitin carboxyl-terminal hydrolase 4 OS=Mus musculus (Mouse) OX=10090 GN=Usp4 PE=1 SV=3	USP4	15	15	-1.01079e-14	1	1	FALSE	74	71	74	71	0.15657
Q8R5H1	Q8R5H1	>sp|Q8R5H1|UBP15_MOUSE Ubiquitin carboxyl-terminal hydrolase 15 OS=Mus musculus (Mouse) OX=10090 GN=Usp15 PE=1 SV=1	USP15	21	19	0.0481122	0.0719604	0.23094	FALSE	102	102	102	102	-0.0439359
P54775	P54775	>sp|P54775|PRS6B_MOUSE 26S proteasome regulatory subunit 6B OS=Mus musculus (Mouse) OX=10090 GN=Psmc4 PE=1 SV=2	PSMC4	20	18	-0.0497677	0.00532762	0.0296836	FALSE	97	94	97	94	0.108498
Q80UG5	Q80UG5	>sp|Q80UG5|SEPT9_MOUSE Septin-9 OS=Mus musculus (Mouse) OX=10090 GN=Septin9 PE=1 SV=1	SEPTIN9	19	18	1.01758e-16	1	1	FALSE	92	90	92	90	0.0630835
P28661	P28661	>sp|P28661|SEPT4_MOUSE Septin-4 OS=Mus musculus (Mouse) OX=10090 GN=Septin4 PE=1 SV=1	SEPTIN4	6	5	-9.74277e-19	1	1	FALSE	25	24	25	24	0.15377
Q9Z1S5	Q9Z1S5	>sp|Q9Z1S5|SEPT3_MOUSE Neuronal-specific septin-3 OS=Mus musculus (Mouse) OX=10090 GN=Septin3 PE=1 SV=2	SEPTIN3	15	15	-1.37838e-18	1	1	FALSE	75	72	75	72	0.155224
Q64324	Q64324	>sp|Q64324|STXB2_MOUSE Syntaxin-binding protein 2 OS=Mus musculus (Mouse) OX=10090 GN=Stxbp2 PE=1 SV=1	STXBP2	3	2	0	1	1	FALSE	13	13	13	13	-0.0436763
P84089	P84089	>sp|P84089|ERH_MOUSE Enhancer of rudimentary homolog OS=Mus musculus (Mouse) OX=10090 GN=Erh PE=1 SV=1	ERH	1	1	0.571203	8.49462e-07	2.00452e-05	TRUE	5	5	5	5	-0.046026
Q5F2E7	Q5F2E7	>sp|Q5F2E7|NUFP2_MOUSE Nuclear fragile X mental retardation-interacting protein 2 OS=Mus musculus (Mouse) OX=10090 GN=Nufip2 PE=1 SV=1	NUFIP2	8	7	0.0593322	0.0465898	0.166143	FALSE	40	38	40	38	0.202117
Q5DW34	Q5DW34	>sp|Q5DW34|EHMT1_MOUSE Histone-lysine N-methyltransferase EHMT1 OS=Mus musculus (Mouse) OX=10090 GN=Ehmt1 PE=1 SV=2	EHMT1	2	2	0.0655606	0.0791081	0.247928	FALSE	10	10	10	10	-0.0450912
Q8K2F0	Q8K2F0	>sp|Q8K2F0|BRD3_MOUSE Bromodomain-containing protein 3 OS=Mus musculus (Mouse) OX=10090 GN=Brd3 PE=1 SV=2	BRD3	4	3	0.127397	0.00288151	0.0181511	FALSE	18	19	18	19	-0.299031
P23818	P23818	>sp|P23818|GRIA1_MOUSE Glutamate receptor 1 OS=Mus musculus (Mouse) OX=10090 GN=Gria1 PE=1 SV=1	GRIA1	19	18	0.202991	8.16955e-05	0.000988386	FALSE	93	92	93	92	0.00885046
Q3UHJ0	Q3UHJ0	>sp|Q3UHJ0|AAK1_MOUSE AP2-associated protein kinase 1 OS=Mus musculus (Mouse) OX=10090 GN=Aak1 PE=1 SV=2	AAK1	18	18	0	1	1	FALSE	89	89	89	89	-0.0448561
E9Q616	E9Q616	>tr|E9Q616|E9Q616_MOUSE PDZ domain-containing protein OS=Mus musculus (Mouse) OX=10090 GN=Ahnak PE=1 SV=1	AHNAK	70	45	-0.381188	0.00230907	0.0151984	FALSE	268	315	268	315	-0.842294
Q9JLI6	Q9JLI6	>sp|Q9JLI6|SCLY_MOUSE Selenocysteine lyase OS=Mus musculus (Mouse) OX=10090 GN=Scly PE=1 SV=1	SCLY	3	2	0.113833	0.00906711	0.0455267	FALSE	12	11	12	11	0.351481
Q99ME9	Q99ME9	>sp|Q99ME9|NOG1_MOUSE Nucleolar GTP-binding protein 1 OS=Mus musculus (Mouse) OX=10090 GN=Gtpbp4 PE=1 SV=3	GTPBP4	7	7	0	1	1	FALSE	33	34	33	34	-0.186913
P56695	P56695	>sp|P56695|WFS1_MOUSE Wolframin OS=Mus musculus (Mouse) OX=10090 GN=Wfs1 PE=1 SV=1	WFS1	8	8	0.210122	2.25823e-08	8.47892e-07	FALSE	40	38	40	38	0.204301
Q8BJS4	Q8BJS4	>sp|Q8BJS4|SUN2_MOUSE SUN domain-containing protein 2 OS=Mus musculus (Mouse) OX=10090 GN=Sun2 PE=1 SV=3	SUN2	8	7	-0.080079	0.0522794	0.18055	FALSE	36	37	36	37	-0.175386
G5E829;Q6Q477;Q9R0K7	G5E829;Q6Q477;Q9R0K7	>sp|G5E829|AT2B1_MOUSE Plasma membrane calcium-transporting ATPase 1 OS=Mus musculus (Mouse) OX=10090 GN=Atp2b1 PE=1 SV=1;>sp|Q6Q477|AT2B4_MOUSE Plasma membrane calcium-transporting ATPase 4 OS=Mus musculus (Mouse) OX=10090 GN=Atp2b4 PE=1 SV=1;>sp|Q9R0K7|AT2B2_MOUSE Plasma membrane calcium-transporting ATPase 2 OS=Mus musculus (Mouse) OX=10090 GN=Atp2b2 PE=1 SV=2	ATP2B1;ATP2B4;ATP2B2	8	8	-1.21784e-15	1	1	FALSE	40	40	40	40	-0.0442712
Q8BUV3	Q8BUV3	>sp|Q8BUV3|GEPH_MOUSE Gephyrin OS=Mus musculus (Mouse) OX=10090 GN=Gphn PE=1 SV=2	GPHN	25	24	-0.150049	3.89913e-05	0.00052345	FALSE	121	121	121	121	-0.0441726
P57716	P57716	>sp|P57716|NICA_MOUSE Nicastrin OS=Mus musculus (Mouse) OX=10090 GN=Ncstn PE=1 SV=3	NCSTN	9	9	-0.00284798	0.813779	1	FALSE	45	45	45	45	-0.0442385
O09174	O09174	>sp|O09174|AMACR_MOUSE Alpha-methylacyl-CoA racemase OS=Mus musculus (Mouse) OX=10090 GN=Amacr PE=1 SV=4	AMACR	4	4	0.0516465	0.0518113	0.179503	FALSE	20	20	20	20	-0.0445575
Q91VK1	Q91VK1	>sp|Q91VK1|BZW2_MOUSE Basic leucine zipper and W2 domain-containing protein 2 OS=Mus musculus (Mouse) OX=10090 GN=Bzw2 PE=1 SV=1	BZW2	11	9	0.0849474	0.00914703	0.0458073	FALSE	53	51	53	51	0.140807
E9Q2E4	E9Q2E4	>tr|E9Q2E4|E9Q2E4_MOUSE HECT domain-containing protein OS=Mus musculus (Mouse) OX=10090 GN=Hectd4 PE=1 SV=2	HECTD4	21	14	-0.112581	0.0015355	0.0108972	FALSE	85	96	85	96	-0.63958
P49025	P49025	>sp|P49025|CTRO_MOUSE Citron Rho-interacting kinase OS=Mus musculus (Mouse) OX=10090 GN=Cit PE=1 SV=3	CIT	5	4	0.134342	0.000668435	0.00546654	FALSE	20	22	20	22	-0.491712
Q62318	Q62318	>sp|Q62318|TIF1B_MOUSE Transcription intermediary factor 1-beta OS=Mus musculus (Mouse) OX=10090 GN=Trim28 PE=1 SV=3	TRIM28	18	16	0.00245068	0.822125	1	FALSE	88	83	88	83	0.241538
P16546	P16546	>sp|P16546|SPTN1_MOUSE Spectrin alpha chain, non-erythrocytic 1 OS=Mus musculus (Mouse) OX=10090 GN=Sptan1 PE=1 SV=4	SPTAN1	148	140	-0.385432	8.59212e-19	3.8523e-16	TRUE	713	720	713	720	-0.0919955
Q61024	Q61024	>sp|Q61024|ASNS_MOUSE Asparagine synthetase [glutamine-hydrolyzing] OS=Mus musculus (Mouse) OX=10090 GN=Asns PE=1 SV=3	ASNS	14	14	-0.223015	8.09347e-08	2.54911e-06	FALSE	70	70	70	70	-0.0441442
P19783	P19783	>sp|P19783|COX41_MOUSE Cytochrome c oxidase subunit 4 isoform 1, mitochondrial OS=Mus musculus (Mouse) OX=10090 GN=Cox4i1 PE=1 SV=2	COX4I1	12	12	0.27442	7.88821e-14	1.39823e-11	FALSE	60	60	60	60	-0.0441726
P50516	P50516	>sp|P50516|VATA_MOUSE V-type proton ATPase catalytic subunit A OS=Mus musculus (Mouse) OX=10090 GN=Atp6v1a PE=1 SV=2	ATP6V1A	33	31	-9.14552e-17	1	1	FALSE	158	158	158	158	-0.0447468
Q8VEE4	Q8VEE4	>sp|Q8VEE4|RFA1_MOUSE Replication protein A 70 kDa DNA-binding subunit OS=Mus musculus (Mouse) OX=10090 GN=Rpa1 PE=1 SV=1	RPA1	11	8	1.20766e-18	1	1	FALSE	51	47	51	47	0.35027
Q9Z2C9	Q9Z2C9	>sp|Q9Z2C9|MTMR7_MOUSE Myotubularin-related protein 7 OS=Mus musculus (Mouse) OX=10090 GN=Mtmr7 PE=1 SV=2	MTMR7	11	10	0.218294	1.54518e-15	3.68042e-13	FALSE	52	52	52	52	-0.0428663
Q80TY0	Q80TY0	>sp|Q80TY0|FNBP1_MOUSE Formin-binding protein 1 OS=Mus musculus (Mouse) OX=10090 GN=Fnbp1 PE=1 SV=2	FNBP1	9	7	-0.0853447	0.00480662	0.027443	FALSE	42	41	42	41	0.0713014
Q3UHD9	Q3UHD9	>sp|Q3UHD9|AGAP2_MOUSE Arf-GAP with GTPase, ANK repeat and PH domain-containing protein 2 OS=Mus musculus (Mouse) OX=10090 GN=Agap2 PE=1 SV=1	AGAP2	13	13	-0.0705791	0.101414	0.298908	FALSE	65	65	65	65	-0.0441573
Q3UE31	Q3UE31	>sp|Q3UE31|K0930_MOUSE Uncharacterized protein KIAA0930 homolog OS=Mus musculus (Mouse) OX=10090 GN=MGI:2444899 PE=1 SV=2	MGI:2444899	6	6	-0.0488131	0.0705064	0.22723	FALSE	28	28	28	28	-0.0421945
Q91YI0	Q91YI0	>sp|Q91YI0|ARLY_MOUSE Argininosuccinate lyase OS=Mus musculus (Mouse) OX=10090 GN=Asl PE=1 SV=1	ASL	17	16	-0.0571744	0.0746449	0.237159	FALSE	81	85	81	85	-0.280097
O88428	O88428	>sp|O88428|PAPS2_MOUSE Bifunctional 3'-phosphoadenosine 5'-phosphosulfate synthase 2 OS=Mus musculus (Mouse) OX=10090 GN=Papss2 PE=1 SV=2	PAPSS2	1	1	-0.0973666	0.153823	0.40738	FALSE	4	5	4	5	-0.95557
O08917	O08917	>sp|O08917|FLOT1_MOUSE Flotillin-1 OS=Mus musculus (Mouse) OX=10090 GN=Flot1 PE=1 SV=1	FLOT1	24	23	-2.93697e-17	1	1	FALSE	118	117	118	117	-0.00214295
P63325	P63325	>sp|P63325|RS10_MOUSE 40S ribosomal protein S10 OS=Mus musculus (Mouse) OX=10090 GN=Rps10 PE=1 SV=1	RPS10	8	7	0	1	1	FALSE	38	37	38	37	0.0855081
Q8K183	Q8K183	>sp|Q8K183|PDXK_MOUSE Pyridoxal kinase OS=Mus musculus (Mouse) OX=10090 GN=Pdxk PE=1 SV=1	PDXK	11	9	-0.062459	0.0124325	0.0587842	FALSE	49	52	49	52	-0.332041
P97765	P97765	>sp|P97765|WBP2_MOUSE WW domain-binding protein 2 OS=Mus musculus (Mouse) OX=10090 GN=Wbp2 PE=1 SV=1	WBP2	5	5	2.1513e-18	1	1	FALSE	25	25	25	25	-0.0444446
Q5DTU0	Q5DTU0	>sp|Q5DTU0|AF1L2_MOUSE Actin filament-associated protein 1-like 2 OS=Mus musculus (Mouse) OX=10090 GN=Afap1l2 PE=1 SV=2	AFAP1L2	15	14	-0.127126	0.0336735	0.12891	FALSE	71	74	71	74	-0.247116
Q9R1R2	Q9R1R2	>sp|Q9R1R2|TRIM3_MOUSE Tripartite motif-containing protein 3 OS=Mus musculus (Mouse) OX=10090 GN=Trim3 PE=1 SV=1	TRIM3	15	14	0.180026	2.19127e-05	0.000320574	FALSE	74	72	74	72	0.0889121
Q9D7A8	Q9D7A8	>sp|Q9D7A8|ARMC1_MOUSE Armadillo repeat-containing protein 1 OS=Mus musculus (Mouse) OX=10090 GN=Armc1 PE=1 SV=1	ARMC1	8	8	0.126933	1.83057e-05	0.00027477	FALSE	40	40	40	40	-0.0442712
Q8BTZ4	Q8BTZ4	>sp|Q8BTZ4|APC5_MOUSE Anaphase-promoting complex subunit 5 OS=Mus musculus (Mouse) OX=10090 GN=Anapc5 PE=1 SV=1	ANAPC5	15	14	1.08412e-18	1	1	FALSE	73	70	73	70	0.160795
Q8K1N4	Q8K1N4	>sp|Q8K1N4|SPAS2_MOUSE Spermatogenesis-associated serine-rich protein 2 OS=Mus musculus (Mouse) OX=10090 GN=Spats2 PE=1 SV=1	SPATS2	5	4	5.17939e-18	1	1	FALSE	23	24	23	24	-0.24625
Q6PB70	Q6PB70	>sp|Q6PB70|ANO8_MOUSE Anoctamin-8 OS=Mus musculus (Mouse) OX=10090 GN=Ano8 PE=1 SV=3	ANO8	3	3	0.0517115	0.0900426	0.274522	FALSE	15	15	15	15	-0.0447409
Q8R1N4	Q8R1N4	>sp|Q8R1N4|NUDC3_MOUSE NudC domain-containing protein 3 OS=Mus musculus (Mouse) OX=10090 GN=Nudcd3 PE=1 SV=3	NUDCD3	9	7	-2.19051e-19	1	1	FALSE	42	42	42	42	-0.0446692
Q8K2Q0	Q8K2Q0	>sp|Q8K2Q0|COMD9_MOUSE COMM domain-containing protein 9 OS=Mus musculus (Mouse) OX=10090 GN=Commd9 PE=1 SV=3	COMMD9	6	6	-1.09842e-22	1	1	FALSE	30	29	30	29	0.117468
Q3UQ84	Q3UQ84	>sp|Q3UQ84|SYTM_MOUSE Threonine--tRNA ligase, mitochondrial OS=Mus musculus (Mouse) OX=10090 GN=Tars2 PE=1 SV=1	TARS2	9	8	0.0909911	0.000373237	0.00342749	FALSE	41	44	41	44	-0.386392
Q80U87	Q80U87	>sp|Q80U87|UBP8_MOUSE Ubiquitin carboxyl-terminal hydrolase 8 OS=Mus musculus (Mouse) OX=10090 GN=Usp8 PE=1 SV=2	USP8	16	14	-0.0546126	0.00219553	0.0145897	FALSE	72	74	72	74	-0.178195
Q6R891	Q6R891	>sp|Q6R891|NEB2_MOUSE Neurabin-2 OS=Mus musculus (Mouse) OX=10090 GN=Ppp1r9b PE=1 SV=1	PPP1R9B	22	21	1.28259e-17	1	1	FALSE	105	106	105	106	-0.0905796
O08601	O08601	>sp|O08601|MTP_MOUSE Microsomal triglyceride transfer protein large subunit OS=Mus musculus (Mouse) OX=10090 GN=Mttp PE=1 SV=2	MTTP	8	7	-0.102583	0.000356233	0.00329916	FALSE	35	38	35	38	-0.438935
Q9DBE9	Q9DBE9	>sp|Q9DBE9|SPB1_MOUSE pre-rRNA 2'-O-ribose RNA methyltransferase FTSJ3 OS=Mus musculus (Mouse) OX=10090 GN=Ftsj3 PE=1 SV=1	FTSJ3	1	1	0.209789	0.00197347	0.0133231	FALSE	5	5	5	5	-0.046026
Q60625	Q60625	>sp|Q60625|ICAM5_MOUSE Intercellular adhesion molecule 5 OS=Mus musculus (Mouse) OX=10090 GN=Icam5 PE=1 SV=2	ICAM5	8	8	-0.182544	0.00259492	0.0167615	FALSE	39	40	39	40	-0.165824
Q8C7Q4;Q8VE92	Q8C7Q4;Q8VE92	>sp|Q8C7Q4|RBM4_MOUSE RNA-binding protein 4 OS=Mus musculus (Mouse) OX=10090 GN=Rbm4 PE=1 SV=1;>sp|Q8VE92|RBM4B_MOUSE RNA-binding protein 4B OS=Mus musculus (Mouse) OX=10090 GN=Rbm4b PE=1 SV=1	RBM4;RBM4B	4	3	0.0728081	0.0698807	0.225882	FALSE	18	18	18	18	-0.0479495
Q6GQT9	Q6GQT9	>sp|Q6GQT9|NOMO1_MOUSE Nodal modulator 1 OS=Mus musculus (Mouse) OX=10090 GN=Nomo1 PE=1 SV=1	NOMO1	31	29	-0.0231027	0.0603922	0.201713	FALSE	148	147	148	147	-0.0113639
P26645	P26645	>sp|P26645|MARCS_MOUSE Myristoylated alanine-rich C-kinase substrate OS=Mus musculus (Mouse) OX=10090 GN=Marcks PE=1 SV=2	MARCKS	10	9	0.0978814	0.144428	0.389604	FALSE	48	50	48	50	-0.242272
P48428	P48428	>sp|P48428|TBCA_MOUSE Tubulin-specific chaperone A OS=Mus musculus (Mouse) OX=10090 GN=Tbca PE=1 SV=3	TBCA	7	7	0.0697282	0.103876	0.304868	FALSE	35	32	35	32	0.388236
P07356	P07356	>sp|P07356|ANXA2_MOUSE Annexin A2 OS=Mus musculus (Mouse) OX=10090 GN=Anxa2 PE=1 SV=2	ANXA2	23	20	-2.21468e-16	1	1	FALSE	106	105	106	105	0.00138745
Q14CH0	Q14CH0	>sp|Q14CH0|F171B_MOUSE Protein FAM171B OS=Mus musculus (Mouse) OX=10090 GN=Fam171b PE=1 SV=2	FAM171B	13	8	-0.0470185	0.125144	0.349909	FALSE	56	51	56	51	0.408832
Q6PDY2	Q6PDY2	>sp|Q6PDY2|AEDO_MOUSE 2-aminoethanethiol dioxygenase OS=Mus musculus (Mouse) OX=10090 GN=Ado PE=1 SV=2	ADO	3	3	0.0825982	0.00292101	0.0183646	FALSE	15	15	15	15	-0.0447409
P17918	P17918	>sp|P17918|PCNA_MOUSE Proliferating cell nuclear antigen OS=Mus musculus (Mouse) OX=10090 GN=Pcna PE=1 SV=2	PCNA	5	5	0.0411213	0.512521	0.993246	FALSE	25	24	25	24	0.149422
P97300	P97300	>sp|P97300|NPTN_MOUSE Neuroplastin OS=Mus musculus (Mouse) OX=10090 GN=Nptn PE=1 SV=3	NPTN	9	8	-0.171664	1.88484e-05	0.00028114	FALSE	42	44	42	44	-0.26793
Q9Z268	Q9Z268	>sp|Q9Z268|RASL1_MOUSE RasGAP-activating-like protein 1 OS=Mus musculus (Mouse) OX=10090 GN=Rasal1 PE=1 SV=2	RASAL1	9	7	-0.199933	9.04371e-05	0.0010654	FALSE	38	40	38	40	-0.293299
Q61699	Q61699	>sp|Q61699|HS105_MOUSE Heat shock protein 105 kDa OS=Mus musculus (Mouse) OX=10090 GN=Hsph1 PE=1 SV=2	HSPH1	28	25	-0.0750524	0.00120796	0.00893023	FALSE	134	132	134	132	0.0299438
P70336	P70336	>sp|P70336|ROCK2_MOUSE Rho-associated protein kinase 2 OS=Mus musculus (Mouse) OX=10090 GN=Rock2 PE=1 SV=1	ROCK2	34	28	-0.201606	2.5672e-16	8.50749e-14	FALSE	156	154	156	154	0.0194592
Q9ERG2	Q9ERG2	>sp|Q9ERG2|STRN3_MOUSE Striatin-3 OS=Mus musculus (Mouse) OX=10090 GN=Strn3 PE=1 SV=1	STRN3	8	7	-0.0498479	0.00341114	0.0208385	FALSE	38	40	38	40	-0.291265
Q8K296	Q8K296	>sp|Q8K296|MTMR3_MOUSE Myotubularin-related protein 3 OS=Mus musculus (Mouse) OX=10090 GN=Mtmr3 PE=1 SV=2	MTMR3	7	6	0	1	1	FALSE	34	31	34	31	0.397644
Q8R422	Q8R422	>sp|Q8R422|CD109_MOUSE CD109 antigen OS=Mus musculus (Mouse) OX=10090 GN=Cd109 PE=1 SV=1	CD109	20	18	-0.0490462	0.424042	0.859815	FALSE	92	92	92	92	-0.0447016
Q9WV92	Q9WV92	>sp|Q9WV92|E41L3_MOUSE Band 4.1-like protein 3 OS=Mus musculus (Mouse) OX=10090 GN=Epb41l3 PE=1 SV=1	EPB41L3	24	22	0.153688	0.00126273	0.00925533	FALSE	116	114	116	114	0.0414079
P35564	P35564	>sp|P35564|CALX_MOUSE Calnexin OS=Mus musculus (Mouse) OX=10090 GN=Canx PE=1 SV=1	CANX	22	22	9.79168e-18	1	1	FALSE	109	110	109	110	-0.0887752
Q9QX96	Q9QX96	>sp|Q9QX96|SALL2_MOUSE Sal-like protein 2 OS=Mus musculus (Mouse) OX=10090 GN=Sall2 PE=1 SV=2	SALL2	1	1	0.066121	0.195591	0.483866	FALSE	5	4	5	4	0.861346
P50518;Q9D593	P50518;Q9D593	>sp|P50518|VATE1_MOUSE V-type proton ATPase subunit E 1 OS=Mus musculus (Mouse) OX=10090 GN=Atp6v1e1 PE=1 SV=2;>sp|Q9D593|VATE2_MOUSE V-type proton ATPase subunit E 2 OS=Mus musculus (Mouse) OX=10090 GN=Atp6v1e2 PE=1 SV=1	ATP6V1E1;ATP6V1E2	3	3	-0.0980318	0.0533592	0.183079	FALSE	15	15	15	15	-0.0447409
Q9CZP7	Q9CZP7	>sp|Q9CZP7|CD37L_MOUSE Hsp90 co-chaperone Cdc37-like 1 OS=Mus musculus (Mouse) OX=10090 GN=Cdc37l1 PE=1 SV=1	CDC37L1	3	3	0.116179	0.0378252	0.140957	FALSE	15	14	15	14	0.274317
Q9CW03	Q9CW03	>sp|Q9CW03|SMC3_MOUSE Structural maintenance of chromosomes protein 3 OS=Mus musculus (Mouse) OX=10090 GN=Smc3 PE=1 SV=2	SMC3	26	19	1.28003e-18	1	1	FALSE	111	115	111	115	-0.217944
Q9JJX7	Q9JJX7	>sp|Q9JJX7|TYDP2_MOUSE Tyrosyl-DNA phosphodiesterase 2 OS=Mus musculus (Mouse) OX=10090 GN=Tdp2 PE=1 SV=1	TDP2	2	1	0	1	1	FALSE	8	8	8	8	-0.0415286
P55302	P55302	>sp|P55302|AMRP_MOUSE Alpha-2-macroglobulin receptor-associated protein OS=Mus musculus (Mouse) OX=10090 GN=Lrpap1 PE=1 SV=1	LRPAP1	10	8	-0.0104618	0.579523	1	FALSE	43	44	43	44	-0.154576
Q6PIP5	Q6PIP5	>sp|Q6PIP5|NUDC1_MOUSE NudC domain-containing protein 1 OS=Mus musculus (Mouse) OX=10090 GN=Nudcd1 PE=1 SV=2	NUDCD1	6	5	-5.93731e-18	1	1	FALSE	26	29	26	29	-0.565264
Q91WC0	Q91WC0	>sp|Q91WC0|SETD3_MOUSE Actin-histidine N-methyltransferase OS=Mus musculus (Mouse) OX=10090 GN=Setd3 PE=1 SV=1	SETD3	13	13	-0.0013765	0.819361	1	FALSE	62	63	62	63	-0.122571
Q921H8	Q921H8	>sp|Q921H8|THIKA_MOUSE 3-ketoacyl-CoA thiolase A, peroxisomal OS=Mus musculus (Mouse) OX=10090 GN=Acaa1a PE=1 SV=1	ACAA1A	11	11	-0.0543281	0.0105434	0.0514149	FALSE	55	55	55	55	-0.0441907
Q8BP92	Q8BP92	>sp|Q8BP92|RCN2_MOUSE Reticulocalbin-2 OS=Mus musculus (Mouse) OX=10090 GN=Rcn2 PE=1 SV=1	RCN2	10	10	0	1	1	FALSE	50	49	50	49	0.0536606
Q8K1M6	Q8K1M6	>sp|Q8K1M6|DNM1L_MOUSE Dynamin-1-like protein OS=Mus musculus (Mouse) OX=10090 GN=Dnm1l PE=1 SV=2	DNM1L	36	35	0.0211989	0.395028	0.816395	FALSE	179	177	179	177	0.0112261
Q9DCJ9	Q9DCJ9	>sp|Q9DCJ9|NPL_MOUSE N-acetylneuraminate lyase OS=Mus musculus (Mouse) OX=10090 GN=Npl PE=1 SV=1	NPL	11	10	-0.151315	2.06359e-05	0.00030423	FALSE	52	54	52	54	-0.228387
Q3UJU9	Q3UJU9	>sp|Q3UJU9|RMD3_MOUSE Regulator of microtubule dynamics protein 3 OS=Mus musculus (Mouse) OX=10090 GN=Rmdn3 PE=1 SV=2	RMDN3	10	9	0.14061	1.24066e-07	3.69388e-06	FALSE	47	48	47	48	-0.145651
Q922P8	Q922P8	>sp|Q922P8|T132A_MOUSE Transmembrane protein 132A OS=Mus musculus (Mouse) OX=10090 GN=Tmem132a PE=1 SV=2	TMEM132A	14	13	0.0684923	0.0368386	0.138385	FALSE	67	65	67	65	0.102316
Q569Z6	Q569Z6	>sp|Q569Z6|TR150_MOUSE Thyroid hormone receptor-associated protein 3 OS=Mus musculus (Mouse) OX=10090 GN=Thrap3 PE=1 SV=1	THRAP3	14	12	0	1	1	FALSE	63	64	63	64	-0.120118
Q9D0F4	Q9D0F4	>sp|Q9D0F4|NKAP_MOUSE NF-kappa-B-activating protein OS=Mus musculus (Mouse) OX=10090 GN=Nkap PE=2 SV=1	NKAP	1	1	0	1	1	FALSE	4	4	4	4	-0.0550395
Q80TB8	Q80TB8	>sp|Q80TB8|VAT1L_MOUSE Synaptic vesicle membrane protein VAT-1 homolog-like OS=Mus musculus (Mouse) OX=10090 GN=Vat1l PE=1 SV=2	VAT1L	9	8	0.195281	2.00687e-08	7.60754e-07	FALSE	44	42	44	42	0.180804
Q99MD9	Q99MD9	>sp|Q99MD9|NASP_MOUSE Nuclear autoantigenic sperm protein OS=Mus musculus (Mouse) OX=10090 GN=Nasp PE=1 SV=2	NASP	14	10	0.0928944	0.0539275	0.184652	FALSE	67	61	67	61	0.413349
Q04750	Q04750	>sp|Q04750|TOP1_MOUSE DNA topoisomerase 1 OS=Mus musculus (Mouse) OX=10090 GN=Top1 PE=1 SV=2	TOP1	11	8	-9.14056e-16	1	1	FALSE	48	51	48	51	-0.336488
Q9DCV4	Q9DCV4	>sp|Q9DCV4|RMD1_MOUSE Regulator of microtubule dynamics protein 1 OS=Mus musculus (Mouse) OX=10090 GN=Rmdn1 PE=1 SV=2	RMDN1	6	5	0.0847527	0.0115792	0.0554374	FALSE	26	27	26	27	-0.224668
O88448	O88448	>sp|O88448|KLC2_MOUSE Kinesin light chain 2 OS=Mus musculus (Mouse) OX=10090 GN=Klc2 PE=1 SV=1	KLC2	11	10	-0.128841	0.000165939	0.0017839	FALSE	52	52	52	52	-0.0459181
Q9D6K8	Q9D6K8	>sp|Q9D6K8|FUND2_MOUSE FUN14 domain-containing protein 2 OS=Mus musculus (Mouse) OX=10090 GN=Fundc2 PE=1 SV=1	FUNDC2	3	3	0.197492	0.0185291	0.0801071	FALSE	15	15	15	15	-0.0447409
Q99PT1	Q99PT1	>sp|Q99PT1|GDIR1_MOUSE Rho GDP-dissociation inhibitor 1 OS=Mus musculus (Mouse) OX=10090 GN=Arhgdia PE=1 SV=3	ARHGDIA	9	8	8.04704e-19	1	1	FALSE	42	41	42	41	0.0708619
Q9D753	Q9D753	>sp|Q9D753|EXOS8_MOUSE Exosome complex component RRP43 OS=Mus musculus (Mouse) OX=10090 GN=Exosc8 PE=1 SV=1	EXOSC8	2	2	0.0814863	0.0373693	0.139678	FALSE	10	9	10	9	0.42378
Q8BGB7	Q8BGB7	>sp|Q8BGB7|ENOPH_MOUSE Enolase-phosphatase E1 OS=Mus musculus (Mouse) OX=10090 GN=Enoph1 PE=1 SV=1	ENOPH1	6	4	3.0808e-19	1	1	FALSE	27	24	27	24	0.515928
Q9D4J7	Q9D4J7	>sp|Q9D4J7|PHF6_MOUSE PHD finger protein 6 OS=Mus musculus (Mouse) OX=10090 GN=Phf6 PE=1 SV=1	PHF6	1	1	0.0461864	0.276898	0.629322	FALSE	5	5	5	5	-0.046026
O35594	O35594	>sp|O35594|IFT81_MOUSE Intraflagellar transport protein 81 homolog OS=Mus musculus (Mouse) OX=10090 GN=Ift81 PE=1 SV=4	IFT81	5	5	-1.18284e-15	1	1	FALSE	24	25	24	25	-0.239764
Q8VCT3	Q8VCT3	>sp|Q8VCT3|AMPB_MOUSE Aminopeptidase B OS=Mus musculus (Mouse) OX=10090 GN=Rnpep PE=1 SV=2	RNPEP	13	12	-0.0261847	0.370919	0.778828	FALSE	62	60	62	60	0.116124
Q9R1L5	Q9R1L5	>sp|Q9R1L5|MAST1_MOUSE Microtubule-associated serine/threonine-protein kinase 1 OS=Mus musculus (Mouse) OX=10090 GN=Mast1 PE=1 SV=3	MAST1	18	14	0.282828	9.99075e-12	9.88954e-10	FALSE	77	69	77	69	0.489967
Q91XX1	Q91XX1	>tr|Q91XX1|Q91XX1_MOUSE Protocadherin gamma C3 OS=Mus musculus (Mouse) OX=10090 GN=Pcdhgc3 PE=1 SV=1	PCDHGC3	9	7	-0.0648254	0.155289	0.410275	FALSE	42	43	42	43	-0.157583
Q9D824	Q9D824	>sp|Q9D824|FIP1_MOUSE Pre-mRNA 3'-end-processing factor FIP1 OS=Mus musculus (Mouse) OX=10090 GN=Fip1l1 PE=1 SV=1	FIP1L1	4	4	0.00819314	0.703144	1	FALSE	20	19	20	19	0.197977
P59017	P59017	>sp|P59017|B2L13_MOUSE Bcl-2-like protein 13 OS=Mus musculus (Mouse) OX=10090 GN=Bcl2l13 PE=1 SV=2	BCL2L13	9	8	0.045	0.196117	0.484612	FALSE	40	40	40	40	-0.0442712
Q61644	Q61644	>sp|Q61644|PACN1_MOUSE Protein kinase C and casein kinase substrate in neurons protein 1 OS=Mus musculus (Mouse) OX=10090 GN=Pacsin1 PE=1 SV=1	PACSIN1	15	14	-8.95042e-07	0.997238	1	FALSE	71	70	71	70	0.0250843
P28658	P28658	>sp|P28658|ATX10_MOUSE Ataxin-10 OS=Mus musculus (Mouse) OX=10090 GN=Atxn10 PE=1 SV=2	ATXN10	20	19	0.0409272	0.0898502	0.274045	FALSE	94	94	94	94	-0.044137
Q920R0	Q920R0	>sp|Q920R0|ALS2_MOUSE Alsin OS=Mus musculus (Mouse) OX=10090 GN=Als2 PE=1 SV=3	ALS2	12	9	0	1	1	FALSE	55	53	55	53	0.134198
Q9QYR6	Q9QYR6	>sp|Q9QYR6|MAP1A_MOUSE Microtubule-associated protein 1A OS=Mus musculus (Mouse) OX=10090 GN=Map1a PE=1 SV=2	MAP1A	45	43	-0.153679	1.01962e-11	9.96352e-10	FALSE	217	218	217	218	-0.0668095
Q8VE97	Q8VE97	>sp|Q8VE97|SRSF4_MOUSE Serine/arginine-rich splicing factor 4 OS=Mus musculus (Mouse) OX=10090 GN=Srsf4 PE=2 SV=1	SRSF4	5	4	0.130943	0.0116758	0.0557948	FALSE	22	22	22	22	-0.0460691
Q8C8R3	Q8C8R3	>sp|Q8C8R3|ANK2_MOUSE Ankyrin-2 OS=Mus musculus (Mouse) OX=10090 GN=Ank2 PE=1 SV=2	ANK2	72	62	-0.209099	2.01617e-08	7.60754e-07	FALSE	339	340	339	340	-0.0583757
Q80YA9	Q80YA9	>sp|Q80YA9|CNKR2_MOUSE Connector enhancer of kinase suppressor of ras 2 OS=Mus musculus (Mouse) OX=10090 GN=Cnksr2 PE=1 SV=1	CNKSR2	14	13	-0.14315	0.0219513	0.0919301	FALSE	68	68	68	68	-0.0448368
Q9DB41	Q9DB41	>sp|Q9DB41|GHC2_MOUSE Mitochondrial glutamate carrier 2 OS=Mus musculus (Mouse) OX=10090 GN=Slc25a18 PE=1 SV=4	SLC25A18	10	8	1.29423e-15	1	1	FALSE	46	44	46	44	0.169829
P18052	P18052	>sp|P18052|PTPRA_MOUSE Receptor-type tyrosine-protein phosphatase alpha OS=Mus musculus (Mouse) OX=10090 GN=Ptpra PE=1 SV=3	PTPRA	11	10	-0.0998211	8.86749e-07	2.06691e-05	FALSE	51	53	51	53	-0.230853
Q3UNH4	Q3UNH4	>sp|Q3UNH4|GRIN1_MOUSE G protein-regulated inducer of neurite outgrowth 1 OS=Mus musculus (Mouse) OX=10090 GN=Gprin1 PE=1 SV=2	GPRIN1	23	22	0.0412031	0.422426	0.85787	FALSE	113	108	113	108	0.177432
Q80YA8	Q80YA8	>sp|Q80YA8|CRUM2_MOUSE Protein crumbs homolog 2 OS=Mus musculus (Mouse) OX=10090 GN=Crb2 PE=1 SV=3	CRB2	6	4	-0.31063	0.0544595	0.186056	FALSE	24	29	24	29	-0.947656
P49446	P49446	>sp|P49446|PTPRE_MOUSE Receptor-type tyrosine-protein phosphatase epsilon OS=Mus musculus (Mouse) OX=10090 GN=Ptpre PE=1 SV=3	PTPRE	14	12	-0.140365	0.0007474	0.00598391	FALSE	62	65	62	65	-0.272497
P19253	P19253	>sp|P19253|RL13A_MOUSE 60S ribosomal protein L13a OS=Mus musculus (Mouse) OX=10090 GN=Rpl13a PE=1 SV=4	RPL13A	6	5	0.0736934	0.0434235	0.157141	FALSE	29	27	29	27	0.296183
P52480	P52480	>sp|P52480|KPYM_MOUSE Pyruvate kinase PKM OS=Mus musculus (Mouse) OX=10090 GN=Pkm PE=1 SV=4	PKM	39	38	-0.084936	0.0238373	0.0982097	FALSE	188	192	188	192	-0.147587
Q8K268	Q8K268	>sp|Q8K268|ABCF3_MOUSE ATP-binding cassette sub-family F member 3 OS=Mus musculus (Mouse) OX=10090 GN=Abcf3 PE=1 SV=1	ABCF3	15	14	0.0520716	0.0309486	0.121093	FALSE	72	72	72	72	-0.0432117
Q60738	Q60738	>sp|Q60738|ZNT1_MOUSE Zinc transporter 1 OS=Mus musculus (Mouse) OX=10090 GN=Slc30a1 PE=1 SV=1	SLC30A1	5	5	-0.0839334	0.0812256	0.253522	FALSE	25	25	25	25	-0.0444446
O54774	O54774	>sp|O54774|AP3D1_MOUSE AP-3 complex subunit delta-1 OS=Mus musculus (Mouse) OX=10090 GN=Ap3d1 PE=1 SV=1	AP3D1	31	29	-0.0140727	0.432128	0.871343	FALSE	149	150	149	150	-0.0763296
Q9D906	Q9D906	>sp|Q9D906|ATG7_MOUSE Ubiquitin-like modifier-activating enzyme ATG7 OS=Mus musculus (Mouse) OX=10090 GN=Atg7 PE=1 SV=1	ATG7	16	15	0.0013367	0.786868	1	FALSE	77	78	77	78	-0.107034
Q925E7	Q925E7	>sp|Q925E7|2ABD_MOUSE Serine/threonine-protein phosphatase 2A 55 kDa regulatory subunit B delta isoform OS=Mus musculus (Mouse) OX=10090 GN=Ppp2r2d PE=1 SV=1	PPP2R2D	3	3	-0.0217067	0.369102	0.776558	FALSE	15	14	15	14	0.274317
P14733	P14733	>sp|P14733|LMNB1_MOUSE Lamin-B1 OS=Mus musculus (Mouse) OX=10090 GN=Lmnb1 PE=1 SV=3	LMNB1	31	30	-7.35175e-18	1	1	FALSE	149	149	149	149	-0.0433472
P97434	P97434	>sp|P97434|MPRIP_MOUSE Myosin phosphatase Rho-interacting protein OS=Mus musculus (Mouse) OX=10090 GN=Mprip PE=1 SV=2	MPRIP	30	28	-0.20846	0.00125839	0.00924742	FALSE	140	148	140	148	-0.316787
Q99KK2	Q99KK2	>sp|Q99KK2|NEUA_MOUSE N-acylneuraminate cytidylyltransferase OS=Mus musculus (Mouse) OX=10090 GN=Cmas PE=1 SV=2	CMAS	15	14	0.154273	1.82546e-08	7.0271e-07	FALSE	73	72	73	72	0.023365
Q62172	Q62172	>sp|Q62172|RBP1_MOUSE RalA-binding protein 1 OS=Mus musculus (Mouse) OX=10090 GN=Ralbp1 PE=1 SV=4	RALBP1	2	1	0	1	1	FALSE	6	7	6	7	-0.704784
Q9Z2W8	Q9Z2W8	>sp|Q9Z2W8|GRIA4_MOUSE Glutamate receptor 4 OS=Mus musculus (Mouse) OX=10090 GN=Gria4 PE=1 SV=2	GRIA4	3	2	0.189549	0.0150424	0.068246	FALSE	15	13	15	13	0.612677
O35071	O35071	>sp|O35071|KIF1C_MOUSE Kinesin-like protein KIF1C OS=Mus musculus (Mouse) OX=10090 GN=Kif1c PE=1 SV=2	KIF1C	5	4	-5.37007e-19	1	1	FALSE	21	25	21	25	-0.872552
Q91Z67	Q91Z67	>sp|Q91Z67|SRGP2_MOUSE SLIT-ROBO Rho GTPase-activating protein 2 OS=Mus musculus (Mouse) OX=10090 GN=Srgap2 PE=1 SV=2	SRGAP2	30	29	-5.00321e-17	1	1	FALSE	147	147	147	147	-0.0441156
Q91Z69	Q91Z69	>sp|Q91Z69|SRGP1_MOUSE SLIT-ROBO Rho GTPase-activating protein 1 OS=Mus musculus (Mouse) OX=10090 GN=Srgap1 PE=1 SV=2	SRGAP1	10	8	-0.148776	0.000564084	0.00477716	FALSE	46	50	46	50	-0.448111
Q9CQ80	Q9CQ80	>sp|Q9CQ80|VPS25_MOUSE Vacuolar protein-sorting-associated protein 25 OS=Mus musculus (Mouse) OX=10090 GN=Vps25 PE=1 SV=1	VPS25	8	7	0.0288526	0.177944	0.452096	FALSE	37	35	37	35	0.220257
Q8BFU3	Q8BFU3	>sp|Q8BFU3|RN214_MOUSE RING finger protein 214 OS=Mus musculus (Mouse) OX=10090 GN=Rnf214 PE=1 SV=1	RNF214	12	10	0.0883098	0.00251474	0.0163265	FALSE	54	55	54	55	-0.132437
Q05BC3	Q05BC3	>sp|Q05BC3|EMAL1_MOUSE Echinoderm microtubule-associated protein-like 1 OS=Mus musculus (Mouse) OX=10090 GN=Eml1 PE=1 SV=1	EML1	12	11	5.55217e-18	1	1	FALSE	55	53	55	53	0.136765
Q8BTM8	Q8BTM8	>sp|Q8BTM8|FLNA_MOUSE Filamin-A OS=Mus musculus (Mouse) OX=10090 GN=Flna PE=1 SV=5	FLNA	62	61	-0.400801	0.0114417	0.0548482	FALSE	305	309	305	309	-0.107914
O08788	O08788	>sp|O08788|DCTN1_MOUSE Dynactin subunit 1 OS=Mus musculus (Mouse) OX=10090 GN=Dctn1 PE=1 SV=3	DCTN1	44	40	0.00976133	0.259758	0.598872	FALSE	211	209	211	209	0.00178643
Q8BKT7	Q8BKT7	>sp|Q8BKT7|THOC5_MOUSE THO complex subunit 5 homolog OS=Mus musculus (Mouse) OX=10090 GN=Thoc5 PE=1 SV=2	THOC5	3	2	0.0257831	0.495355	0.966199	FALSE	11	11	11	11	-0.0453228
Q91VC9	Q91VC9	>sp|Q91VC9|GHITM_MOUSE Growth hormone-inducible transmembrane protein OS=Mus musculus (Mouse) OX=10090 GN=Ghitm PE=1 SV=1	GHITM	4	4	0.0837656	0.0218384	0.0915938	FALSE	20	20	20	20	-0.0445575
Q9D0L4	Q9D0L4	>sp|Q9D0L4|ADCK1_MOUSE AarF domain-containing protein kinase 1 OS=Mus musculus (Mouse) OX=10090 GN=Adck1 PE=1 SV=1	ADCK1	7	7	0	1	1	FALSE	35	34	35	34	0.0942419
Q9JJ89	Q9JJ89	>sp|Q9JJ89|CCD86_MOUSE Coiled-coil domain-containing protein 86 OS=Mus musculus (Mouse) OX=10090 GN=Ccdc86 PE=1 SV=2	CCDC86	1	1	0.0536269	0.307451	0.675041	FALSE	5	4	5	4	0.854505
P70663	P70663	>sp|P70663|SPRL1_MOUSE SPARC-like protein 1 OS=Mus musculus (Mouse) OX=10090 GN=Sparcl1 PE=1 SV=3	SPARCL1	6	6	-0.193937	0.00295912	0.0185328	FALSE	29	30	29	30	-0.204992
Q9EQH3	Q9EQH3	>sp|Q9EQH3|VPS35_MOUSE Vacuolar protein sorting-associated protein 35 OS=Mus musculus (Mouse) OX=10090 GN=Vps35 PE=1 SV=1	VPS35	26	24	0	1	1	FALSE	127	127	127	127	-0.0438419
O54988	O54988	>sp|O54988|SLK_MOUSE STE20-like serine/threonine-protein kinase OS=Mus musculus (Mouse) OX=10090 GN=Slk PE=1 SV=2	SLK	11	7	-0.649494	2.08291e-10	1.40495e-08	TRUE	40	55	40	55	-1.58144
Q6NZL0	Q6NZL0	>sp|Q6NZL0|SOGA3_MOUSE Protein SOGA3 OS=Mus musculus (Mouse) OX=10090 GN=Soga3 PE=1 SV=2	SOGA3	26	25	0.0472029	0.100351	0.296807	FALSE	126	128	126	128	-0.121593
Q8VIJ6	Q8VIJ6	>sp|Q8VIJ6|SFPQ_MOUSE Splicing factor, proline- and glutamine-rich OS=Mus musculus (Mouse) OX=10090 GN=Sfpq PE=1 SV=1	SFPQ	16	16	0.00205636	0.792314	1	FALSE	79	80	79	80	-0.10527
Q8R326	Q8R326	>sp|Q8R326|PSPC1_MOUSE Paraspeckle component 1 OS=Mus musculus (Mouse) OX=10090 GN=Pspc1 PE=1 SV=1	PSPC1	10	9	0.103488	1.26268e-08	5.09215e-07	FALSE	49	48	49	48	0.0557721
Q7TMS5	Q7TMS5	>sp|Q7TMS5|ABCG2_MOUSE Broad substrate specificity ATP-binding cassette transporter ABCG2 OS=Mus musculus (Mouse) OX=10090 GN=Abcg2 PE=1 SV=1	ABCG2	3	3	-6.69241e-20	1	1	FALSE	15	15	15	15	-0.0447409
Q6URW6	Q6URW6	>sp|Q6URW6|MYH14_MOUSE Myosin-14 OS=Mus musculus (Mouse) OX=10090 GN=Myh14 PE=1 SV=1	MYH14	60	48	-0.444638	0.000973182	0.00746237	TRUE	260	288	260	288	-0.546616
Q8VC31	Q8VC31	>sp|Q8VC31|CCDC9_MOUSE Coiled-coil domain-containing protein 9 OS=Mus musculus (Mouse) OX=10090 GN=Ccdc9 PE=1 SV=1	CCDC9	2	2	0	1	1	FALSE	10	10	10	10	-0.0450912
D3YZP9	D3YZP9	>sp|D3YZP9|CCDC6_MOUSE Coiled-coil domain-containing protein 6 OS=Mus musculus (Mouse) OX=10090 GN=Ccdc6 PE=1 SV=1	CCDC6	9	8	-0.0881949	0.000405416	0.00366683	FALSE	43	45	43	45	-0.263421
Q924Z6	Q924Z6	>sp|Q924Z6|XPO6_MOUSE Exportin-6 OS=Mus musculus (Mouse) OX=10090 GN=Xpo6 PE=1 SV=2	XPO6	8	6	-6.30949e-20	1	1	FALSE	37	36	37	36	0.0871917
Q91YP2	Q91YP2	>sp|Q91YP2|NEUL_MOUSE Neurolysin, mitochondrial OS=Mus musculus (Mouse) OX=10090 GN=Nln PE=1 SV=1	NLN	18	18	8.85177e-18	1	1	FALSE	89	90	89	90	-0.0984959
O54818	O54818	>sp|O54818|TPD53_MOUSE Tumor protein D53 OS=Mus musculus (Mouse) OX=10090 GN=Tpd52l1 PE=1 SV=1	TPD52L1	3	3	-0.0377034	0.415747	0.84955	FALSE	15	15	15	15	-0.0447409
Q7TQK5	Q7TQK5	>sp|Q7TQK5|CCD93_MOUSE Coiled-coil domain-containing protein 93 OS=Mus musculus (Mouse) OX=10090 GN=Ccdc93 PE=1 SV=1	CCDC93	20	14	-0.0520034	0.00425537	0.0247591	FALSE	89	83	89	83	0.296032
D4AFX7	D4AFX7	>tr|D4AFX7|D4AFX7_MOUSE J domain-containing protein OS=Mus musculus (Mouse) OX=10090 GN=Dnajc13 PE=1 SV=1	DNAJC13	34	31	-0.304572	0.00281735	0.01788	FALSE	159	167	159	167	-0.284006
Q8BZS9	Q8BZS9	>sp|Q8BZS9|DHX32_MOUSE Putative pre-mRNA-splicing factor ATP-dependent RNA helicase DHX32 OS=Mus musculus (Mouse) OX=10090 GN=Dhx32 PE=1 SV=2	DHX32	8	5	-0.0114815	0.678295	1	FALSE	29	30	29	30	-0.20742
O08528	O08528	>sp|O08528|HXK2_MOUSE Hexokinase-2 OS=Mus musculus (Mouse) OX=10090 GN=Hk2 PE=1 SV=1	HK2	5	2	9.95723e-17	1	1	FALSE	18	15	18	15	0.800596
Q99J85	Q99J85	>sp|Q99J85|NPTXR_MOUSE Neuronal pentraxin receptor OS=Mus musculus (Mouse) OX=10090 GN=Nptxr PE=1 SV=1	NPTXR	6	6	-7.49349e-18	1	1	FALSE	30	30	30	30	-0.0443681
E9Q9R9	E9Q9R9	>sp|E9Q9R9|DLG5_MOUSE Disks large homolog 5 OS=Mus musculus (Mouse) OX=10090 GN=Dlg5 PE=1 SV=1	DLG5	5	4	0	1	1	FALSE	21	23	21	23	-0.47275
Q61672	Q61672	>sp|Q61672|S29A2_MOUSE Equilibrative nucleoside transporter 2 OS=Mus musculus (Mouse) OX=10090 GN=Slc29a2 PE=1 SV=2	SLC29A2	2	2	0.193135	0.00416028	0.0243422	FALSE	10	9	10	9	0.428883
Q6QD59	Q6QD59	>sp|Q6QD59|SEC20_MOUSE Vesicle transport protein SEC20 OS=Mus musculus (Mouse) OX=10090 GN=Bnip1 PE=1 SV=1	BNIP1	5	4	4.20694e-18	1	1	FALSE	22	21	22	21	0.177319
P62908	P62908	>sp|P62908|RS3_MOUSE 40S ribosomal protein S3 OS=Mus musculus (Mouse) OX=10090 GN=Rps3 PE=1 SV=1	RPS3	16	16	0.0400778	0.0820487	0.255568	FALSE	80	78	80	78	0.0793833
O55106	O55106	>sp|O55106|STRN_MOUSE Striatin OS=Mus musculus (Mouse) OX=10090 GN=Strn PE=1 SV=2	STRN	15	14	-0.0635935	0.0185061	0.080053	FALSE	69	73	69	73	-0.31807
P55937	P55937	>sp|P55937|GOGA3_MOUSE Golgin subfamily A member 3 OS=Mus musculus (Mouse) OX=10090 GN=Golga3 PE=1 SV=3	GOLGA3	21	18	-0.0453754	0.00131145	0.00955627	FALSE	99	97	99	97	0.0552928
Q9R0E2	Q9R0E2	>sp|Q9R0E2|PLOD1_MOUSE Procollagen-lysine,2-oxoglutarate 5-dioxygenase 1 OS=Mus musculus (Mouse) OX=10090 GN=Plod1 PE=1 SV=1	PLOD1	7	6	-1.12487e-16	1	1	FALSE	31	34	31	34	-0.491243
Q8BG32	Q8BG32	>sp|Q8BG32|PSD11_MOUSE 26S proteasome non-ATPase regulatory subunit 11 OS=Mus musculus (Mouse) OX=10090 GN=Psmd11 PE=1 SV=3	PSMD11	24	24	-0.0746655	2.8296e-06	5.77705e-05	FALSE	119	120	119	120	-0.0849204
Q8K1X1	Q8K1X1	>sp|Q8K1X1|WDR11_MOUSE WD repeat-containing protein 11 OS=Mus musculus (Mouse) OX=10090 GN=Wdr11 PE=1 SV=1	WDR11	14	13	-0.0152582	0.309009	0.677044	FALSE	70	68	70	68	0.0974666
Q9CWF6	Q9CWF6	>sp|Q9CWF6|BBS2_MOUSE Bardet-Biedl syndrome 2 protein homolog OS=Mus musculus (Mouse) OX=10090 GN=Bbs2 PE=1 SV=1	BBS2	3	2	5.38529e-20	1	1	FALSE	13	13	13	13	-0.0471545
P41216	P41216	>sp|P41216|ACSL1_MOUSE Long-chain-fatty-acid--CoA ligase 1 OS=Mus musculus (Mouse) OX=10090 GN=Acsl1 PE=1 SV=2	ACSL1	17	16	0.204015	7.37301e-08	2.36122e-06	FALSE	83	84	83	84	-0.102004
Q8BR92	Q8BR92	>sp|Q8BR92|PALM2_MOUSE Paralemmin-2 OS=Mus musculus (Mouse) OX=10090 GN=Palm2 PE=1 SV=1	PALM2	9	8	0	1	1	FALSE	43	42	43	42	0.0687154
Q91X97	Q91X97	>sp|Q91X97|NCALD_MOUSE Neurocalcin-delta OS=Mus musculus (Mouse) OX=10090 GN=Ncald PE=1 SV=4	NCALD	5	4	0.292687	0.000607964	0.00504782	FALSE	23	25	23	25	-0.439164
Q9EPE9	Q9EPE9	>sp|Q9EPE9|AT131_MOUSE Manganese-transporting ATPase 13A1 OS=Mus musculus (Mouse) OX=10090 GN=Atp13a1 PE=1 SV=2	ATP13A1	18	17	-3.53234e-16	1	1	FALSE	86	85	86	85	0.0119367
Q3TLI0	Q3TLI0	>sp|Q3TLI0|TPC10_MOUSE Trafficking protein particle complex subunit 10 OS=Mus musculus (Mouse) OX=10090 GN=Trappc10 PE=1 SV=2	TRAPPC10	12	9	2.95949e-18	1	1	FALSE	59	52	59	52	0.570679
P03995	P03995	>sp|P03995|GFAP_MOUSE Glial fibrillary acidic protein OS=Mus musculus (Mouse) OX=10090 GN=Gfap PE=1 SV=4	GFAP	39	35	-0.0576913	0.353785	0.751755	FALSE	187	186	187	186	-0.0179379
P05063	P05063	>sp|P05063|ALDOC_MOUSE Fructose-bisphosphate aldolase C OS=Mus musculus (Mouse) OX=10090 GN=Aldoc PE=1 SV=4	ALDOC	24	23	-1.28968e-16	1	1	FALSE	118	117	118	117	-0.00170822
Q62217	Q62217	>sp|Q62217|SEM5A_MOUSE Semaphorin-5A OS=Mus musculus (Mouse) OX=10090 GN=Sema5a PE=2 SV=1	SEMA5A	1	1	0.0198425	0.566233	1	FALSE	5	5	5	5	-0.046026
Q61335	Q61335	>sp|Q61335|BAP31_MOUSE B-cell receptor-associated protein 31 OS=Mus musculus (Mouse) OX=10090 GN=Bcap31 PE=1 SV=4	BCAP31	9	7	-2.17561e-19	1	1	FALSE	44	41	44	41	0.29573
P59999	P59999	>sp|P59999|ARPC4_MOUSE Actin-related protein 2/3 complex subunit 4 OS=Mus musculus (Mouse) OX=10090 GN=Arpc4 PE=1 SV=3	ARPC4	8	7	-0.00865992	0.571138	1	FALSE	34	34	34	34	-0.0456291
Q8BH24	Q8BH24	>sp|Q8BH24|TM9S4_MOUSE Transmembrane 9 superfamily member 4 OS=Mus musculus (Mouse) OX=10090 GN=Tm9sf4 PE=1 SV=1	TM9SF4	5	5	-0.0215648	0.318407	0.693004	FALSE	25	25	25	25	-0.0444446
Q8VHI3	Q8VHI3	>sp|Q8VHI3|OFUT2_MOUSE GDP-fucose protein O-fucosyltransferase 2 OS=Mus musculus (Mouse) OX=10090 GN=Pofut2 PE=1 SV=1	POFUT2	8	7	-0.00425115	0.713509	1	FALSE	35	37	35	37	-0.312028
Q03141;Q05512;Q8VHJ5	Q03141;Q05512;Q8VHJ5	>sp|Q03141|MARK3_MOUSE MAP/microtubule affinity-regulating kinase 3 OS=Mus musculus (Mouse) OX=10090 GN=Mark3 PE=1 SV=2;>sp|Q05512|MARK2_MOUSE Serine/threonine-protein kinase MARK2 OS=Mus musculus (Mouse) OX=10090 GN=Mark2 PE=1 SV=3;>sp|Q8VHJ5|MARK1_MOUSE Serine/threonine-protein kinase MARK1 OS=Mus musculus (Mouse) OX=10090 GN=Mark1 PE=1 SV=2	MARK3;MARK2;MARK1	2	2	-0.0621368	0.0781721	0.245905	FALSE	10	10	10	10	-0.0450912
Q8CIP4	Q8CIP4	>sp|Q8CIP4|MARK4_MOUSE MAP/microtubule affinity-regulating kinase 4 OS=Mus musculus (Mouse) OX=10090 GN=Mark4 PE=1 SV=1	MARK4	3	3	4.55334e-19	1	1	FALSE	15	15	15	15	-0.0447409
Q6P4S6	Q6P4S6	>sp|Q6P4S6|SIK3_MOUSE Serine/threonine-protein kinase SIK3 OS=Mus musculus (Mouse) OX=10090 GN=Sik3 PE=1 SV=3	SIK3	11	7	-0.231887	3.61264e-12	3.87825e-10	FALSE	45	48	45	48	-0.356774
Q8R409	Q8R409	>sp|Q8R409|HEXI1_MOUSE Protein HEXIM1 OS=Mus musculus (Mouse) OX=10090 GN=Hexim1 PE=1 SV=1	HEXIM1	5	3	0	1	1	FALSE	20	17	20	17	0.712881
Q6NVG1	Q6NVG1	>sp|Q6NVG1|LPCT4_MOUSE Lysophospholipid acyltransferase LPCAT4 OS=Mus musculus (Mouse) OX=10090 GN=Lpcat4 PE=1 SV=1	LPCAT4	6	6	-0.117422	0.00718184	0.0379875	FALSE	29	30	29	30	-0.207649
Q01730	Q01730	>sp|Q01730|RSU1_MOUSE Ras suppressor protein 1 OS=Mus musculus (Mouse) OX=10090 GN=Rsu1 PE=1 SV=3	RSU1	9	9	-0.0186139	0.559028	1	FALSE	45	45	45	45	-0.0442385
Q66JV4;Q80YR9	Q66JV4;Q80YR9	>sp|Q66JV4|R12BB_MOUSE RNA-binding protein 12B-B OS=Mus musculus (Mouse) OX=10090 GN=Rbm12b2 PE=2 SV=2;>sp|Q80YR9|R12BA_MOUSE RNA-binding protein 12B-A OS=Mus musculus (Mouse) OX=10090 GN=Rbm12b1 PE=1 SV=2	RBM12B2;RBM12B1	5	4	0.0601998	0.0741319	0.23602	FALSE	22	21	22	21	0.170101
P46460	P46460	>sp|P46460|NSF_MOUSE Vesicle-fusing ATPase OS=Mus musculus (Mouse) OX=10090 GN=Nsf PE=1 SV=2	NSF	43	40	-0.147647	0.0128701	0.0603879	FALSE	202	206	202	206	-0.140668
Q7TSC1	Q7TSC1	>sp|Q7TSC1|PRC2A_MOUSE Protein PRRC2A OS=Mus musculus (Mouse) OX=10090 GN=Prrc2a PE=1 SV=1	PRRC2A	13	11	1.51863e-17	1	1	FALSE	63	62	63	62	0.0355301
Q7TPV4	Q7TPV4	>sp|Q7TPV4|MBB1A_MOUSE Myb-binding protein 1A OS=Mus musculus (Mouse) OX=10090 GN=Mybbp1a PE=1 SV=2	MYBBP1A	34	33	-3.48257e-17	1	1	FALSE	164	168	164	168	-0.162614
Q9WTQ5	Q9WTQ5	>sp|Q9WTQ5|AKA12_MOUSE A-kinase anchor protein 12 OS=Mus musculus (Mouse) OX=10090 GN=Akap12 PE=1 SV=1	AKAP12	29	22	-1.83806e-16	1	1	FALSE	126	129	126	129	-0.158265
Q9R061	Q9R061	>sp|Q9R061|NUBP2_MOUSE Cytosolic Fe-S cluster assembly factor NUBP2 OS=Mus musculus (Mouse) OX=10090 GN=Nubp2 PE=1 SV=1	NUBP2	4	3	-7.65494e-16	1	1	FALSE	20	18	20	18	0.448567
O08808	O08808	>sp|O08808|DIAP1_MOUSE Protein diaphanous homolog 1 OS=Mus musculus (Mouse) OX=10090 GN=Diaph1 PE=1 SV=1	DIAPH1	16	11	-0.0313978	0.107466	0.312397	FALSE	66	74	66	74	-0.604283
Q91YX5	Q91YX5	>sp|Q91YX5|LGAT1_MOUSE Acyl-CoA:lysophosphatidylglycerol acyltransferase 1 OS=Mus musculus (Mouse) OX=10090 GN=Lpgat1 PE=1 SV=1	LPGAT1	5	5	-7.73044e-17	1	1	FALSE	24	25	24	25	-0.239764
Q6ZWM4	Q6ZWM4	>sp|Q6ZWM4|LSM8_MOUSE U6 snRNA-associated Sm-like protein LSm8 OS=Mus musculus (Mouse) OX=10090 GN=Lsm8 PE=1 SV=3	LSM8	5	4	0.0672508	0.0777169	0.244675	FALSE	22	23	22	23	-0.254982
Q80UP3	Q80UP3	>sp|Q80UP3|DGKZ_MOUSE Diacylglycerol kinase zeta OS=Mus musculus (Mouse) OX=10090 GN=Dgkz PE=1 SV=2	DGKZ	7	7	-0.0943651	0.00396423	0.0235322	FALSE	31	33	31	33	-0.344422
Q9Z2Y3	Q9Z2Y3	>sp|Q9Z2Y3|HOME1_MOUSE Homer protein homolog 1 OS=Mus musculus (Mouse) OX=10090 GN=Homer1 PE=1 SV=2	HOMER1	14	11	1.0461e-19	1	1	FALSE	65	64	65	64	0.03216
Q99K74	Q99K74	>sp|Q99K74|MED24_MOUSE Mediator of RNA polymerase II transcription subunit 24 OS=Mus musculus (Mouse) OX=10090 GN=Med24 PE=1 SV=1	MED24	4	4	0.0776848	0.00941779	0.0469845	FALSE	20	20	20	20	-0.0445575
O88737	O88737	>sp|O88737|BSN_MOUSE Protein bassoon OS=Mus musculus (Mouse) OX=10090 GN=Bsn PE=1 SV=4	BSN	44	38	-0.274842	4.44526e-05	0.000579176	FALSE	204	203	204	203	-0.019619
Q8BIK4	Q8BIK4	>sp|Q8BIK4|DOCK9_MOUSE Dedicator of cytokinesis protein 9 OS=Mus musculus (Mouse) OX=10090 GN=Dock9 PE=1 SV=2	DOCK9	12	11	-0.16026	0.105839	0.309351	FALSE	57	59	57	59	-0.209711
Q80XI4	Q80XI4	>sp|Q80XI4|PI42B_MOUSE Phosphatidylinositol 5-phosphate 4-kinase type-2 beta OS=Mus musculus (Mouse) OX=10090 GN=Pip4k2b PE=1 SV=1	PIP4K2B	16	12	-3.8015e-19	1	1	FALSE	73	69	73	69	0.230273
E9Q634	E9Q634	>sp|E9Q634|MYO1E_MOUSE Unconventional myosin-Ie OS=Mus musculus (Mouse) OX=10090 GN=Myo1e PE=1 SV=1	MYO1E	8	7	-0.0750124	0.0175621	0.0770629	FALSE	38	38	38	38	-0.0446943
Q3UMY5	Q3UMY5	>sp|Q3UMY5|EMAL4_MOUSE Echinoderm microtubule-associated protein-like 4 OS=Mus musculus (Mouse) OX=10090 GN=Eml4 PE=1 SV=1	EML4	15	13	0.0482578	0.0100119	0.0493923	FALSE	72	73	72	73	-0.110518
Q7TT37	Q7TT37	>sp|Q7TT37|ELP1_MOUSE Elongator complex protein 1 OS=Mus musculus (Mouse) OX=10090 GN=Elp1 PE=1 SV=2	ELP1	21	18	0.0256298	0.17294	0.442777	FALSE	97	96	97	96	0.00716381
Q99JB2	Q99JB2	>sp|Q99JB2|STML2_MOUSE Stomatin-like protein 2, mitochondrial OS=Mus musculus (Mouse) OX=10090 GN=Stoml2 PE=1 SV=1	STOML2	9	9	0.0910148	5.93651e-05	0.000744212	FALSE	45	44	45	44	0.0638597
P60487	P60487	>sp|P60487|PLPP_MOUSE Pyridoxal phosphate phosphatase OS=Mus musculus (Mouse) OX=10090 GN=Pdxp PE=1 SV=1	PDXP	8	7	2.84761e-18	1	1	FALSE	36	37	36	37	-0.176726
Q9WVK8	Q9WVK8	>sp|Q9WVK8|CP46A_MOUSE Cholesterol 24-hydroxylase OS=Mus musculus (Mouse) OX=10090 GN=Cyp46a1 PE=1 SV=1	CYP46A1	16	16	-0.238747	1.87072e-09	9.56954e-08	FALSE	78	80	78	80	-0.167184
Q9JHR7	Q9JHR7	>sp|Q9JHR7|IDE_MOUSE Insulin-degrading enzyme OS=Mus musculus (Mouse) OX=10090 GN=Ide PE=1 SV=1	IDE	37	37	-0.143448	1.87582e-06	4.08499e-05	FALSE	183	184	183	184	-0.0710805
P02468	P02468	>sp|P02468|LAMC1_MOUSE Laminin subunit gamma-1 OS=Mus musculus (Mouse) OX=10090 GN=Lamc1 PE=1 SV=2	LAMC1	27	23	-0.190503	0.13758	0.376259	FALSE	122	129	122	129	-0.317306
P32507	P32507	>sp|P32507|NECT2_MOUSE Nectin-2 OS=Mus musculus (Mouse) OX=10090 GN=Nectin2 PE=1 SV=2	NECTIN2	4	4	-7.62752e-18	1	1	FALSE	20	19	20	19	0.195426
Q8BH15	Q8BH15	>sp|Q8BH15|CNO10_MOUSE CCR4-NOT transcription complex subunit 10 OS=Mus musculus (Mouse) OX=10090 GN=Cnot10 PE=1 SV=1	CNOT10	8	7	-7.75452e-17	1	1	FALSE	37	39	37	39	-0.298322
Q6P2K6;Q922R5	Q6P2K6;Q922R5	>sp|Q6P2K6|P4R3A_MOUSE Serine/threonine-protein phosphatase 4 regulatory subunit 3A OS=Mus musculus (Mouse) OX=10090 GN=Ppp4r3a PE=1 SV=1;>sp|Q922R5|P4R3B_MOUSE Serine/threonine-protein phosphatase 4 regulatory subunit 3B OS=Mus musculus (Mouse) OX=10090 GN=Ppp4r3b PE=1 SV=2	PPP4R3A;PPP4R3B	2	2	0.0612883	0.0552856	0.188119	FALSE	10	10	10	10	-0.0450912
Q9D662	Q9D662	>sp|Q9D662|SC23B_MOUSE Protein transport protein Sec23B OS=Mus musculus (Mouse) OX=10090 GN=Sec23b PE=1 SV=1	SEC23B	7	7	-0.0337958	0.38932	0.808336	FALSE	35	35	35	35	-0.0443129
Q9QWI6	Q9QWI6	>sp|Q9QWI6|SRCN1_MOUSE SRC kinase signaling inhibitor 1 OS=Mus musculus (Mouse) OX=10090 GN=Srcin1 PE=1 SV=2	SRCIN1	32	29	0.0762607	0.133909	0.368866	FALSE	149	154	149	154	-0.205736
Q80XI3	Q80XI3	>sp|Q80XI3|IF4G3_MOUSE Eukaryotic translation initiation factor 4 gamma 3 OS=Mus musculus (Mouse) OX=10090 GN=Eif4g3 PE=1 SV=2	EIF4G3	25	23	-0.0905032	0.0195063	0.0834228	FALSE	119	121	119	121	-0.124847
Q6A065	Q6A065	>sp|Q6A065|CE170_MOUSE Centrosomal protein of 170 kDa OS=Mus musculus (Mouse) OX=10090 GN=Cep170 PE=1 SV=2	CEP170	26	25	0.0686062	5.3079e-05	0.000676535	FALSE	128	126	128	126	0.0333113
Q8R146	Q8R146	>sp|Q8R146|APEH_MOUSE Acylamino-acid-releasing enzyme OS=Mus musculus (Mouse) OX=10090 GN=Apeh PE=1 SV=3	APEH	10	10	0.0521764	0.0960678	0.287599	FALSE	48	50	48	50	-0.242272
P22315	P22315	>sp|P22315|HEMH_MOUSE Ferrochelatase, mitochondrial OS=Mus musculus (Mouse) OX=10090 GN=Fech PE=1 SV=2	FECH	17	16	0.0200083	0.255905	0.591421	FALSE	79	83	79	83	-0.285737
Q99K51	Q99K51	>sp|Q99K51|PLST_MOUSE Plastin-3 OS=Mus musculus (Mouse) OX=10090 GN=Pls3 PE=1 SV=3	PLS3	14	12	-0.198032	0.000104998	0.00121256	FALSE	63	67	63	67	-0.342496
Q8JZY2	Q8JZY2	>sp|Q8JZY2|COMDA_MOUSE COMM domain-containing protein 10 OS=Mus musculus (Mouse) OX=10090 GN=Commd10 PE=1 SV=1	COMMD10	4	4	-3.78675e-19	1	1	FALSE	19	20	19	20	-0.283574
Q99LD4	Q99LD4	>sp|Q99LD4|CSN1_MOUSE COP9 signalosome complex subunit 1 OS=Mus musculus (Mouse) OX=10090 GN=Gps1 PE=1 SV=1	GPS1	16	15	0	1	1	FALSE	76	75	76	75	0.0197638
Q99L43	Q99L43	>sp|Q99L43|CDS2_MOUSE Phosphatidate cytidylyltransferase 2 OS=Mus musculus (Mouse) OX=10090 GN=Cds2 PE=1 SV=1	CDS2	4	4	0	1	1	FALSE	20	20	20	20	-0.0445575
Q7TPB0	Q7TPB0	>sp|Q7TPB0|PLPR3_MOUSE Phospholipid phosphatase-related protein type 3 OS=Mus musculus (Mouse) OX=10090 GN=Plppr3 PE=1 SV=1	PLPPR3	12	12	0.22607	1.67203e-07	4.82735e-06	FALSE	59	57	59	57	0.122759
Q01405	Q01405	>sp|Q01405|SC23A_MOUSE Protein transport protein Sec23A OS=Mus musculus (Mouse) OX=10090 GN=Sec23a PE=1 SV=2	SEC23A	15	14	-0.0421849	0.144531	0.389676	FALSE	73	72	73	72	0.024168
Q8BSS9	Q8BSS9	>sp|Q8BSS9|LIPA2_MOUSE Liprin-alpha-2 OS=Mus musculus (Mouse) OX=10090 GN=Ppfia2 PE=1 SV=2	PPFIA2	31	29	-0.258826	9.93755e-09	4.05048e-07	FALSE	146	144	146	144	0.0243498
Q80Y17	Q80Y17	>sp|Q80Y17|L2GL1_MOUSE Lethal(2) giant larvae protein homolog 1 OS=Mus musculus (Mouse) OX=10090 GN=Llgl1 PE=1 SV=1	LLGL1	14	14	-0.111313	0.00024774	0.0024577	FALSE	69	69	69	69	-0.0440952
Q9Z2H5	Q9Z2H5	>sp|Q9Z2H5|E41L1_MOUSE Band 4.1-like protein 1 OS=Mus musculus (Mouse) OX=10090 GN=Epb41l1 PE=1 SV=2	EPB41L1	23	20	0.106783	0.0747631	0.237165	FALSE	109	102	109	102	0.281472
Q8BY87	Q8BY87	>sp|Q8BY87|UBP47_MOUSE Ubiquitin carboxyl-terminal hydrolase 47 OS=Mus musculus (Mouse) OX=10090 GN=Usp47 PE=1 SV=2	USP47	24	21	-2.01542e-17	1	1	FALSE	111	112	111	112	-0.0886876
Q8C878	Q8C878	>sp|Q8C878|UBA3_MOUSE NEDD8-activating enzyme E1 catalytic subunit OS=Mus musculus (Mouse) OX=10090 GN=Uba3 PE=1 SV=2	UBA3	7	7	0	1	1	FALSE	35	35	35	35	-0.0443129
Q9D1H7	Q9D1H7	>sp|Q9D1H7|GET4_MOUSE Golgi to ER traffic protein 4 homolog OS=Mus musculus (Mouse) OX=10090 GN=Get4 PE=1 SV=2	GET4	8	6	-8.00982e-17	1	1	FALSE	38	35	38	35	0.351188
Q91W18	Q91W18	>sp|Q91W18|TDRD3_MOUSE Tudor domain-containing protein 3 OS=Mus musculus (Mouse) OX=10090 GN=Tdrd3 PE=1 SV=4	TDRD3	7	5	0.00251791	0.757003	1	FALSE	28	27	28	27	0.131417
B9EHT4	B9EHT4	>sp|B9EHT4|CLIP3_MOUSE CAP-Gly domain-containing linker protein 3 OS=Mus musculus (Mouse) OX=10090 GN=Clip3 PE=1 SV=1	CLIP3	8	8	0.0297635	0.0942454	0.284265	FALSE	39	39	39	39	-0.0445682
Q921M3	Q921M3	>sp|Q921M3|SF3B3_MOUSE Splicing factor 3B subunit 3 OS=Mus musculus (Mouse) OX=10090 GN=Sf3b3 PE=1 SV=1	SF3B3	28	23	0	1	1	FALSE	134	129	134	129	0.142684
P70365	P70365	>sp|P70365|NCOA1_MOUSE Nuclear receptor coactivator 1 OS=Mus musculus (Mouse) OX=10090 GN=Ncoa1 PE=1 SV=2	NCOA1	5	3	0.12649	0.00241644	0.0157689	FALSE	24	20	24	20	0.813184
Q9CQC6	Q9CQC6	>sp|Q9CQC6|BZW1_MOUSE Basic leucine zipper and W2 domain-containing protein 1 OS=Mus musculus (Mouse) OX=10090 GN=Bzw1 PE=1 SV=1	BZW1	11	11	1.94963e-17	1	1	FALSE	54	55	54	55	-0.132886
Q80X82	Q80X82	>sp|Q80X82|SYMPK_MOUSE Symplekin OS=Mus musculus (Mouse) OX=10090 GN=Sympk PE=1 SV=1	SYMPK	9	8	0.0498127	0.0989201	0.293945	FALSE	44	43	44	43	0.0675263
Q8JZL3	Q8JZL3	>sp|Q8JZL3|THTPA_MOUSE Thiamine-triphosphatase OS=Mus musculus (Mouse) OX=10090 GN=Thtpa PE=1 SV=3	THTPA	5	5	-0.100536	0.0221713	0.0925595	FALSE	25	24	25	24	0.150505
Q3UJB9	Q3UJB9	>sp|Q3UJB9|EDC4_MOUSE Enhancer of mRNA-decapping protein 4 OS=Mus musculus (Mouse) OX=10090 GN=Edc4 PE=1 SV=2	EDC4	23	21	-7.19451e-16	1	1	FALSE	113	109	113	109	0.132118
Q9CZD3	Q9CZD3	>sp|Q9CZD3|GARS_MOUSE Glycine--tRNA ligase OS=Mus musculus (Mouse) OX=10090 GN=Gars1 PE=1 SV=1	GARS1	24	22	-0.102288	0.000395691	0.00358616	FALSE	115	117	115	117	-0.129622
P60670	P60670	>sp|P60670|NPL4_MOUSE Nuclear protein localization protein 4 homolog OS=Mus musculus (Mouse) OX=10090 GN=Nploc4 PE=1 SV=3	NPLOC4	13	12	0	1	1	FALSE	65	61	65	61	0.263452
Q9D7I5	Q9D7I5	>sp|Q9D7I5|LHPP_MOUSE Phospholysine phosphohistidine inorganic pyrophosphate phosphatase OS=Mus musculus (Mouse) OX=10090 GN=Lhpp PE=1 SV=1	LHPP	3	3	-0.0772691	0.0521309	0.180364	FALSE	15	15	15	15	-0.0447409
P62482	P62482	>sp|P62482|KCAB2_MOUSE Voltage-gated potassium channel subunit beta-2 OS=Mus musculus (Mouse) OX=10090 GN=Kcnab2 PE=1 SV=1	KCNAB2	7	7	9.7836e-18	1	1	FALSE	35	34	35	34	0.0956993
E9PUR0	E9PUR0	>tr|E9PUR0|E9PUR0_MOUSE ANK_REP_REGION domain-containing protein OS=Mus musculus (Mouse) OX=10090 GN=Ankhd1 PE=1 SV=1	ANKHD1	3	2	-0.138508	0.0237142	0.0978081	FALSE	12	12	12	12	-0.0473822
P62812	P62812	>sp|P62812|GBRA1_MOUSE Gamma-aminobutyric acid receptor subunit alpha-1 OS=Mus musculus (Mouse) OX=10090 GN=Gabra1 PE=1 SV=1	GABRA1	5	3	0.0617037	0.247263	0.577755	FALSE	22	20	22	20	0.400968
Q9DCL9	Q9DCL9	>sp|Q9DCL9|PUR6_MOUSE Multifunctional protein ADE2 OS=Mus musculus (Mouse) OX=10090 GN=Paics PE=1 SV=4	PAICS	11	10	2.17913e-18	1	1	FALSE	53	55	53	55	-0.223507
Q99NF2	Q99NF2	>sp|Q99NF2|NSMF_MOUSE NMDA receptor synaptonuclear signaling and neuronal migration factor OS=Mus musculus (Mouse) OX=10090 GN=Nsmf PE=1 SV=1	NSMF	4	1	-0.302402	0.00013456	0.00149507	TRUE	14	17	14	17	-0.936974
Q80XR2	Q80XR2	>sp|Q80XR2|AT2C1_MOUSE Calcium-transporting ATPase type 2C member 1 OS=Mus musculus (Mouse) OX=10090 GN=Atp2c1 PE=1 SV=2	ATP2C1	11	10	0.0900131	4.01445e-06	7.74747e-05	FALSE	51	50	51	50	0.0527652
Q0KL02	Q0KL02	>sp|Q0KL02|TRIO_MOUSE Triple functional domain protein OS=Mus musculus (Mouse) OX=10090 GN=Trio PE=1 SV=3	TRIO	28	21	-0.191184	7.83838e-08	2.47901e-06	FALSE	114	130	114	130	-0.687798
Q8BH95	Q8BH95	>sp|Q8BH95|ECHM_MOUSE Enoyl-CoA hydratase, mitochondrial OS=Mus musculus (Mouse) OX=10090 GN=Echs1 PE=1 SV=1	ECHS1	13	12	0.0863669	2.35992e-05	0.000340024	FALSE	60	61	60	61	-0.125719
P26043	P26043	>sp|P26043|RADI_MOUSE Radixin OS=Mus musculus (Mouse) OX=10090 GN=Rdx PE=1 SV=3	RDX	10	10	-0.0668745	0.0869403	0.266843	FALSE	49	50	49	50	-0.141213
P80315	P80315	>sp|P80315|TCPD_MOUSE T-complex protein 1 subunit delta OS=Mus musculus (Mouse) OX=10090 GN=Cct4 PE=1 SV=3	CCT4	25	25	0.00840796	0.406238	0.834819	FALSE	124	123	124	123	-0.00444142
Q99NH0	Q99NH0	>sp|Q99NH0|ANR17_MOUSE Ankyrin repeat domain-containing protein 17 OS=Mus musculus (Mouse) OX=10090 GN=Ankrd17 PE=1 SV=2	ANKRD17	15	13	-0.0648086	0.00724405	0.0380412	FALSE	70	70	70	70	-0.043874
E9Q401	E9Q401	>sp|E9Q401|RYR2_MOUSE Ryanodine receptor 2 OS=Mus musculus (Mouse) OX=10090 GN=Ryr2 PE=1 SV=1	RYR2	5	4	-0.073084	0.145795	0.391616	FALSE	18	22	18	22	-0.986529
Q9ERV1	Q9ERV1	>sp|Q9ERV1|MKRN2_MOUSE Probable E3 ubiquitin-protein ligase makorin-2 OS=Mus musculus (Mouse) OX=10090 GN=Mkrn2 PE=1 SV=2	MKRN2	5	5	-2.33725e-15	1	1	FALSE	25	23	25	23	0.348905
Q921F2	Q921F2	>sp|Q921F2|TADBP_MOUSE TAR DNA-binding protein 43 OS=Mus musculus (Mouse) OX=10090 GN=Tardbp PE=1 SV=1	TARDBP	9	9	0.0438855	0.1657	0.429691	FALSE	44	44	44	44	-0.0439583
Q6PHP6	Q6PHP6	>tr|Q6PHP6|Q6PHP6_MOUSE Ig-like domain-containing protein OS=Mus musculus (Mouse) OX=10090 GN=Lrrn2 PE=1 SV=1	LRRN2	5	1	0	1	1	FALSE	17	16	17	16	0.228746
Q91VM9	Q91VM9	>sp|Q91VM9|IPYR2_MOUSE Inorganic pyrophosphatase 2, mitochondrial OS=Mus musculus (Mouse) OX=10090 GN=Ppa2 PE=1 SV=1	PPA2	10	9	0.0317207	0.162117	0.423896	FALSE	48	47	48	47	0.0560662
O88322	O88322	>sp|O88322|NID2_MOUSE Nidogen-2 OS=Mus musculus (Mouse) OX=10090 GN=Nid2 PE=1 SV=2	NID2	14	11	-0.281667	0.110195	0.318268	FALSE	63	66	63	66	-0.272083
P57722	P57722	>sp|P57722|PCBP3_MOUSE Poly(rC)-binding protein 3 OS=Mus musculus (Mouse) OX=10090 GN=Pcbp3 PE=1 SV=3	PCBP3	5	5	0.0568765	0.0715633	0.229956	FALSE	25	25	25	25	-0.0444446
P60335;Q61990	P60335;Q61990	>sp|P60335|PCBP1_MOUSE Poly(rC)-binding protein 1 OS=Mus musculus (Mouse) OX=10090 GN=Pcbp1 PE=1 SV=1;>sp|Q61990|PCBP2_MOUSE Poly(rC)-binding protein 2 OS=Mus musculus (Mouse) OX=10090 GN=Pcbp2 PE=1 SV=1	PCBP1;PCBP2	2	2	2.76974e-17	1	1	FALSE	10	10	10	10	-0.0450912
Q6PAL7	Q6PAL7	>sp|Q6PAL7|AHDC1_MOUSE AT-hook DNA-binding motif-containing protein 1 OS=Mus musculus (Mouse) OX=10090 GN=Ahdc1 PE=1 SV=1	AHDC1	7	6	0.117666	0.00203137	0.0136415	FALSE	33	32	33	32	0.102166
Q9EPL8	Q9EPL8	>sp|Q9EPL8|IPO7_MOUSE Importin-7 OS=Mus musculus (Mouse) OX=10090 GN=Ipo7 PE=1 SV=2	IPO7	19	17	-5.83367e-17	1	1	FALSE	89	87	89	87	0.0674828
Q6PGF5	Q6PGF5	>tr|Q6PGF5|Q6PGF5_MOUSE Bms1-type G domain-containing protein OS=Mus musculus (Mouse) OX=10090 GN=Bms1 PE=1 SV=1	BMS1	3	2	-0.0782902	0.0533897	0.183079	FALSE	13	15	13	15	-0.704455
Q99NB9	Q99NB9	>sp|Q99NB9|SF3B1_MOUSE Splicing factor 3B subunit 1 OS=Mus musculus (Mouse) OX=10090 GN=Sf3b1 PE=1 SV=1	SF3B1	34	28	0.000400027	0.919884	1	FALSE	157	156	157	156	-0.0126739
Q80TV8	Q80TV8	>sp|Q80TV8|CLAP1_MOUSE CLIP-associating protein 1 OS=Mus musculus (Mouse) OX=10090 GN=Clasp1 PE=1 SV=2	CLASP1	33	31	0.0361643	0.00404886	0.0238488	FALSE	161	159	161	159	0.0173471
Q7TSV4	Q7TSV4	>sp|Q7TSV4|PGM2_MOUSE Phosphoglucomutase-2 OS=Mus musculus (Mouse) OX=10090 GN=Pgm2 PE=1 SV=1	PGM2	15	15	-0.0339789	0.347259	0.740911	FALSE	75	74	75	74	0.0213282
Q9CRY7	Q9CRY7	>sp|Q9CRY7|GDPD1_MOUSE Lysophospholipase D GDPD1 OS=Mus musculus (Mouse) OX=10090 GN=Gdpd1 PE=1 SV=1	GDPD1	13	12	8.38798e-17	1	1	FALSE	63	61	63	61	0.114119
Q99LI2	Q99LI2	>sp|Q99LI2|CLCC1_MOUSE Chloride channel CLIC-like protein 1 OS=Mus musculus (Mouse) OX=10090 GN=Clcc1 PE=1 SV=1	CLCC1	6	6	-7.18775e-16	1	1	FALSE	30	29	30	29	0.117468
Q8C0V0	Q8C0V0	>sp|Q8C0V0|TLK1_MOUSE Serine/threonine-protein kinase tousled-like 1 OS=Mus musculus (Mouse) OX=10090 GN=Tlk1 PE=1 SV=2	TLK1	1	1	0	1	1	FALSE	4	5	4	5	-0.939608
Q91V92	Q91V92	>sp|Q91V92|ACLY_MOUSE ATP-citrate synthase OS=Mus musculus (Mouse) OX=10090 GN=Acly PE=1 SV=1	ACLY	40	39	-0.0867105	0.00422528	0.0246216	FALSE	194	196	194	196	-0.0945249
O88843	O88843	>sp|O88843|CRADD_MOUSE Death domain-containing protein CRADD OS=Mus musculus (Mouse) OX=10090 GN=Cradd PE=1 SV=2	CRADD	3	3	0.0238482	0.421227	0.856615	FALSE	14	12	14	12	0.661151
Q8BX90	Q8BX90	>sp|Q8BX90|FND3A_MOUSE Fibronectin type-III domain-containing protein 3A OS=Mus musculus (Mouse) OX=10090 GN=Fndc3a PE=1 SV=3	FNDC3A	3	3	-0.172746	0.011981	0.0570032	FALSE	13	15	13	15	-0.704472
Q9CZ30	Q9CZ30	>sp|Q9CZ30|OLA1_MOUSE Obg-like ATPase 1 OS=Mus musculus (Mouse) OX=10090 GN=Ola1 PE=1 SV=1	OLA1	22	19	6.86256e-16	1	1	FALSE	101	100	101	100	0.00603869
Q62261	Q62261	>sp|Q62261|SPTB2_MOUSE Spectrin beta chain, non-erythrocytic 1 OS=Mus musculus (Mouse) OX=10090 GN=Sptbn1 PE=1 SV=2	SPTBN1	125	111	-0.361653	6.35508e-16	1.61462e-13	TRUE	575	594	575	594	-0.204583
Q91WM3	Q91WM3	>sp|Q91WM3|U3IP2_MOUSE U3 small nucleolar RNA-interacting protein 2 OS=Mus musculus (Mouse) OX=10090 GN=Rrp9 PE=1 SV=1	RRP9	4	3	1.15471e-16	1	1	FALSE	19	17	19	17	0.474355
P59240	P59240	>sp|P59240|NPHP4_MOUSE Nephrocystin-4 OS=Mus musculus (Mouse) OX=10090 GN=Nphp4 PE=1 SV=2	NPHP4	1	1	0	1	1	FALSE	5	4	5	4	0.855924
Q9CQU5	Q9CQU5	>sp|Q9CQU5|ZWINT_MOUSE ZW10 interactor OS=Mus musculus (Mouse) OX=10090 GN=Zwint PE=1 SV=1	ZWINT	3	3	-0.0938848	0.0180674	0.0788717	FALSE	14	15	14	15	-0.36624
Q91X84	Q91X84	>sp|Q91X84|CRTC3_MOUSE CREB-regulated transcription coactivator 3 OS=Mus musculus (Mouse) OX=10090 GN=Crtc3 PE=1 SV=2	CRTC3	3	3	-0.075238	0.0496079	0.173844	FALSE	14	15	14	15	-0.36624
O88703;O88704	O88703;O88704	>sp|O88703|HCN2_MOUSE Potassium/sodium hyperpolarization-activated cyclic nucleotide-gated channel 2 OS=Mus musculus (Mouse) OX=10090 GN=Hcn2 PE=1 SV=1;>sp|O88704|HCN1_MOUSE Potassium/sodium hyperpolarization-activated cyclic nucleotide-gated channel 1 OS=Mus musculus (Mouse) OX=10090 GN=Hcn1 PE=1 SV=1	HCN2;HCN1	1	1	0	1	1	FALSE	5	5	5	5	-0.046026
Q3UUQ7	Q3UUQ7	>sp|Q3UUQ7|PGAP1_MOUSE GPI inositol-deacylase OS=Mus musculus (Mouse) OX=10090 GN=Pgap1 PE=1 SV=3	PGAP1	13	12	0.0543953	0.0192673	0.0825957	FALSE	65	63	65	63	0.108239
Q11011	Q11011	>sp|Q11011|PSA_MOUSE Puromycin-sensitive aminopeptidase OS=Mus musculus (Mouse) OX=10090 GN=Npepps PE=1 SV=2	NPEPPS	39	34	2.78969e-18	1	1	FALSE	189	179	189	179	0.222982
E9Q343	E9Q343	>tr|E9Q343|E9Q343_MOUSE G protein-coupled receptor 137C OS=Mus musculus (Mouse) OX=10090 GN=Gpr137c PE=4 SV=1	GPR137C	1	1	0	1	1	FALSE	5	5	5	5	-0.046026
P07141	P07141	>sp|P07141|CSF1_MOUSE Macrophage colony-stimulating factor 1 OS=Mus musculus (Mouse) OX=10090 GN=Csf1 PE=1 SV=2	CSF1	1	1	0	1	1	FALSE	4	4	4	4	-0.0584118
P50580	P50580	>sp|P50580|PA2G4_MOUSE Proliferation-associated protein 2G4 OS=Mus musculus (Mouse) OX=10090 GN=Pa2g4 PE=1 SV=3	PA2G4	15	15	0.0133318	0.458321	0.910518	FALSE	75	75	75	75	-0.0441328
Q8BHN3	Q8BHN3	>sp|Q8BHN3|GANAB_MOUSE Neutral alpha-glucosidase AB OS=Mus musculus (Mouse) OX=10090 GN=Ganab PE=1 SV=1	GANAB	35	34	-0.0761409	0.0259023	0.104903	FALSE	171	172	171	172	-0.0730154
Q62083	Q62083	>sp|Q62083|PICK1_MOUSE PRKCA-binding protein OS=Mus musculus (Mouse) OX=10090 GN=Pick1 PE=1 SV=2	PICK1	6	6	-6.9682e-18	1	1	FALSE	30	30	30	30	-0.0443681
Q99KC8	Q99KC8	>sp|Q99KC8|VMA5A_MOUSE von Willebrand factor A domain-containing protein 5A OS=Mus musculus (Mouse) OX=10090 GN=Vwa5a PE=1 SV=2	VWA5A	19	17	9.25994e-18	1	1	FALSE	91	86	91	86	0.232134
O88712	O88712	>sp|O88712|CTBP1_MOUSE C-terminal-binding protein 1 OS=Mus musculus (Mouse) OX=10090 GN=Ctbp1 PE=1 SV=2	CTBP1	9	9	1.93606e-18	1	1	FALSE	44	44	44	44	-0.0435629
Q7TQI3	Q7TQI3	>sp|Q7TQI3|OTUB1_MOUSE Ubiquitin thioesterase OTUB1 OS=Mus musculus (Mouse) OX=10090 GN=Otub1 PE=1 SV=2	OTUB1	10	10	-0.0299481	0.189053	0.472912	FALSE	49	50	49	50	-0.142806
Q99J99	Q99J99	>sp|Q99J99|THTM_MOUSE 3-mercaptopyruvate sulfurtransferase OS=Mus musculus (Mouse) OX=10090 GN=Mpst PE=1 SV=4	MPST	8	8	0.0921828	0.00185687	0.0126744	FALSE	40	40	40	40	-0.0442712
Q7TPM6	Q7TPM6	>sp|Q7TPM6|FSD1_MOUSE Fibronectin type III and SPRY domain-containing protein 1 OS=Mus musculus (Mouse) OX=10090 GN=Fsd1 PE=1 SV=1	FSD1	12	11	0.0169048	0.369227	0.776558	FALSE	59	55	59	55	0.295601
Q8VHX6	Q8VHX6	>sp|Q8VHX6|FLNC_MOUSE Filamin-C OS=Mus musculus (Mouse) OX=10090 GN=Flnc PE=1 SV=3	FLNC	22	16	-2.32946e-17	1	1	FALSE	95	99	95	99	-0.247023
A2A432	A2A432	>sp|A2A432|CUL4B_MOUSE Cullin-4B OS=Mus musculus (Mouse) OX=10090 GN=Cul4b PE=1 SV=1	CUL4B	18	18	0.0056751	0.565752	1	FALSE	89	88	89	88	0.0114579
Q9JJE4	Q9JJE4	>sp|Q9JJE4|PAQR4_MOUSE Progestin and adipoQ receptor family member 4 OS=Mus musculus (Mouse) OX=10090 GN=Paqr4 PE=2 SV=1	PAQR4	4	3	0	1	1	FALSE	16	16	16	16	-0.0407656
P84104	P84104	>sp|P84104|SRSF3_MOUSE Serine/arginine-rich splicing factor 3 OS=Mus musculus (Mouse) OX=10090 GN=Srsf3 PE=1 SV=1	SRSF3	4	4	0.0444383	0.192964	0.479704	FALSE	20	20	20	20	-0.0445575
Q9R1J0	Q9R1J0	>sp|Q9R1J0|NSDHL_MOUSE Sterol-4-alpha-carboxylate 3-dehydrogenase, decarboxylating OS=Mus musculus (Mouse) OX=10090 GN=Nsdhl PE=1 SV=1	NSDHL	11	11	-0.198548	3.41517e-09	1.6168e-07	FALSE	55	55	55	55	-0.0441907
Q9Z0R9	Q9Z0R9	>sp|Q9Z0R9|FADS2_MOUSE Acyl-CoA 6-desaturase OS=Mus musculus (Mouse) OX=10090 GN=Fads2 PE=1 SV=1	FADS2	13	12	-0.0628102	0.125352	0.35036	FALSE	64	60	64	60	0.268627
P11983	P11983	>sp|P11983|TCPA_MOUSE T-complex protein 1 subunit alpha OS=Mus musculus (Mouse) OX=10090 GN=Tcp1 PE=1 SV=3	TCP1	29	28	2.74431e-16	1	1	FALSE	143	143	143	143	-0.0439456
Q8VDJ3	Q8VDJ3	>sp|Q8VDJ3|VIGLN_MOUSE Vigilin OS=Mus musculus (Mouse) OX=10090 GN=Hdlbp PE=1 SV=1	HDLBP	38	34	-0.0144353	0.555739	1	FALSE	181	180	181	180	-0.0173853
O35409	O35409	>sp|O35409|FOLH1_MOUSE Glutamate carboxypeptidase 2 OS=Mus musculus (Mouse) OX=10090 GN=Folh1 PE=1 SV=2	FOLH1	15	14	-0.0943994	0.256347	0.592263	FALSE	68	71	68	71	-0.255328
Q9D1J1	Q9D1J1	>sp|Q9D1J1|NECP2_MOUSE Adaptin ear-binding coat-associated protein 2 OS=Mus musculus (Mouse) OX=10090 GN=Necap2 PE=1 SV=1	NECAP2	3	2	-0.15578	0.01426	0.0655154	FALSE	13	14	13	14	-0.386449
P51863	P51863	>sp|P51863|VA0D1_MOUSE V-type proton ATPase subunit d 1 OS=Mus musculus (Mouse) OX=10090 GN=Atp6v0d1 PE=1 SV=2	ATP6V0D1	11	9	1.31556e-19	1	1	FALSE	51	51	51	51	-0.0422599
Q3UVK0	Q3UVK0	>sp|Q3UVK0|ERMP1_MOUSE Endoplasmic reticulum metallopeptidase 1 OS=Mus musculus (Mouse) OX=10090 GN=Ermp1 PE=1 SV=2	ERMP1	11	10	-0.0392191	0.00643588	0.0346429	FALSE	55	52	55	52	0.226762
O08810	O08810	>sp|O08810|U5S1_MOUSE 116 kDa U5 small nuclear ribonucleoprotein component OS=Mus musculus (Mouse) OX=10090 GN=Eftud2 PE=1 SV=1	EFTUD2	31	26	4.45802e-16	1	1	FALSE	143	143	143	143	-0.0452875
Q9D0E1	Q9D0E1	>sp|Q9D0E1|HNRPM_MOUSE Heterogeneous nuclear ribonucleoprotein M OS=Mus musculus (Mouse) OX=10090 GN=Hnrnpm PE=1 SV=3	HNRNPM	21	21	-1.51317e-15	1	1	FALSE	105	105	105	105	-0.0440869
Q9Z2E1	Q9Z2E1	>sp|Q9Z2E1|MBD2_MOUSE Methyl-CpG-binding domain protein 2 OS=Mus musculus (Mouse) OX=10090 GN=Mbd2 PE=2 SV=2	MBD2	1	1	-0.0762136	0.174793	0.446173	FALSE	5	5	5	5	-0.046026
Q9QXZ0	Q9QXZ0	>sp|Q9QXZ0|MACF1_MOUSE Microtubule-actin cross-linking factor 1 OS=Mus musculus (Mouse) OX=10090 GN=Macf1 PE=1 SV=2	MACF1	96	71	-0.313653	1.20592e-08	4.88911e-07	TRUE	391	452	391	452	-0.758936
Q9D2N4	Q9D2N4	>sp|Q9D2N4|DTNA_MOUSE Dystrobrevin alpha OS=Mus musculus (Mouse) OX=10090 GN=Dtna PE=1 SV=2	DTNA	9	8	-0.154833	8.74506e-07	2.04619e-05	FALSE	43	43	43	43	-0.043882
Q60610	Q60610	>sp|Q60610|TIAM1_MOUSE T-lymphoma invasion and metastasis-inducing protein 1 OS=Mus musculus (Mouse) OX=10090 GN=Tiam1 PE=1 SV=1	TIAM1	5	5	-0.0272003	0.438458	0.880845	FALSE	25	25	25	25	-0.0444446
Q8BWM0	Q8BWM0	>sp|Q8BWM0|PGES2_MOUSE Prostaglandin E synthase 2 OS=Mus musculus (Mouse) OX=10090 GN=Ptges2 PE=1 SV=3	PTGES2	7	7	0.0306303	0.180395	0.456195	FALSE	33	33	33	33	-0.0440568
Q61210	Q61210	>sp|Q61210|ARHG1_MOUSE Rho guanine nucleotide exchange factor 1 OS=Mus musculus (Mouse) OX=10090 GN=Arhgef1 PE=1 SV=2	ARHGEF1	8	6	0	1	1	FALSE	36	36	36	36	-0.0437979
Q6DFW0	Q6DFW0	>sp|Q6DFW0|CI072_MOUSE Guanine nucleotide exchange C9orf72 homolog OS=Mus musculus (Mouse) OX=10090 GN=MGI:1920455 PE=1 SV=2	MGI:1920455	6	5	-0.0155039	0.415955	0.849682	FALSE	27	28	27	28	-0.218289
Q8BG60	Q8BG60	>sp|Q8BG60|TXNIP_MOUSE Thioredoxin-interacting protein OS=Mus musculus (Mouse) OX=10090 GN=Txnip PE=1 SV=1	TXNIP	5	2	-0.477471	0.000853537	0.00669306	TRUE	18	23	18	23	-1.20085
Q8CGY8	Q8CGY8	>sp|Q8CGY8|OGT1_MOUSE UDP-N-acetylglucosamine--peptide N-acetylglucosaminyltransferase 110 kDa subunit OS=Mus musculus (Mouse) OX=10090 GN=Ogt PE=1 SV=2	OGT	17	15	4.78091e-19	1	1	FALSE	80	80	80	80	-0.0434931
Q3TAA7	Q3TAA7	>sp|Q3TAA7|S11IP_MOUSE Serine/threonine-protein kinase 11-interacting protein OS=Mus musculus (Mouse) OX=10090 GN=Stk11ip PE=1 SV=1	STK11IP	5	5	-3.85339e-16	1	1	FALSE	24	24	24	24	-0.0446225
Q60676	Q60676	>sp|Q60676|PPP5_MOUSE Serine/threonine-protein phosphatase 5 OS=Mus musculus (Mouse) OX=10090 GN=Ppp5c PE=1 SV=3	PPP5C	9	9	-4.29293e-18	1	1	FALSE	45	45	45	45	-0.0442385
Q99K70	Q99K70	>sp|Q99K70|RRAGC_MOUSE Ras-related GTP-binding protein C OS=Mus musculus (Mouse) OX=10090 GN=Rragc PE=1 SV=1	RRAGC	4	4	-0.0250275	0.289429	0.64807	FALSE	20	20	20	20	-0.0445575
Q61220	Q61220	>sp|Q61220|NELL2_MOUSE Protein kinase C-binding protein NELL2 OS=Mus musculus (Mouse) OX=10090 GN=Nell2 PE=1 SV=3	NELL2	6	5	-0.454221	4.99071e-10	2.94878e-08	TRUE	26	30	26	30	-0.726153
P70459	P70459	>sp|P70459|ERF_MOUSE ETS domain-containing transcription factor ERF OS=Mus musculus (Mouse) OX=10090 GN=Erf PE=1 SV=1	ERF	1	1	-0.238263	0.00517464	0.0290221	FALSE	5	5	5	5	-0.046026
Q9D1R9	Q9D1R9	>sp|Q9D1R9|RL34_MOUSE 60S ribosomal protein L34 OS=Mus musculus (Mouse) OX=10090 GN=Rpl34 PE=1 SV=2	RPL34	3	3	0.0612967	0.0967384	0.288813	FALSE	15	15	15	15	-0.0447409
Q8CDG3	Q8CDG3	>sp|Q8CDG3|VCIP1_MOUSE Deubiquitinating protein VCIP135 OS=Mus musculus (Mouse) OX=10090 GN=Vcpip1 PE=1 SV=1	VCPIP1	19	13	-0.1331	9.06938e-10	4.97315e-08	FALSE	77	76	77	76	0.0197339
Q8K327	Q8K327	>sp|Q8K327|CHAP1_MOUSE Chromosome alignment-maintaining phosphoprotein 1 OS=Mus musculus (Mouse) OX=10090 GN=Champ1 PE=1 SV=1	CHAMP1	5	4	0.0337973	0.406516	0.834942	FALSE	23	21	23	21	0.381501
E0CZ22	E0CZ22	>tr|E0CZ22|E0CZ22_MOUSE Maestro heat-like repeat family member 1 OS=Mus musculus (Mouse) OX=10090 GN=Mroh1 PE=1 SV=1	MROH1	14	12	-0.15171	4.4438e-07	1.12155e-05	FALSE	66	68	66	68	-0.189479
Q9D2I5	Q9D2I5	>sp|Q9D2I5|ARMC9_MOUSE LisH domain-containing protein ARMC9 OS=Mus musculus (Mouse) OX=10090 GN=Armc9 PE=1 SV=1	ARMC9	4	3	4.49523e-14	0.999999	1	FALSE	20	18	20	18	0.44894
Q61214	Q61214	>sp|Q61214|DYR1A_MOUSE Dual specificity tyrosine-phosphorylation-regulated kinase 1A OS=Mus musculus (Mouse) OX=10090 GN=Dyrk1a PE=1 SV=1	DYRK1A	5	3	0	1	1	FALSE	23	22	23	22	0.162503
Q3TCN2	Q3TCN2	>sp|Q3TCN2|PLBL2_MOUSE Putative phospholipase B-like 2 OS=Mus musculus (Mouse) OX=10090 GN=Plbd2 PE=1 SV=2	PLBD2	13	13	-0.0639036	0.061586	0.204625	FALSE	61	64	61	64	-0.277222
Q91ZV0	Q91ZV0	>sp|Q91ZV0|MIA2_MOUSE Melanoma inhibitory activity protein 2 OS=Mus musculus (Mouse) OX=10090 GN=Mia2 PE=1 SV=3	MIA2	11	10	-0.0153233	0.399368	0.823367	FALSE	53	50	53	50	0.237334
Q5U452	Q5U452	>tr|Q5U452|Q5U452_MOUSE Protein kinase domain-containing protein OS=Mus musculus (Mouse) OX=10090 GN=Trp53rka PE=1 SV=1	TRP53RKA	1	1	0	1	1	FALSE	5	5	5	5	-0.046026
Q8CHT3	Q8CHT3	>sp|Q8CHT3|INT5_MOUSE Integrator complex subunit 5 OS=Mus musculus (Mouse) OX=10090 GN=Ints5 PE=2 SV=1	INTS5	6	5	0.0582588	0.0554359	0.188404	FALSE	28	28	28	28	-0.0432033
P61027	P61027	>sp|P61027|RAB10_MOUSE Ras-related protein Rab-10 OS=Mus musculus (Mouse) OX=10090 GN=Rab10 PE=1 SV=1	RAB10	8	7	0.0549104	0.185433	0.46615	FALSE	40	38	40	38	0.202731
Q91WC3	Q91WC3	>sp|Q91WC3|ACSL6_MOUSE Long-chain-fatty-acid--CoA ligase 6 OS=Mus musculus (Mouse) OX=10090 GN=Acsl6 PE=1 SV=1	ACSL6	29	28	-0.0345682	0.0143307	0.0656818	FALSE	138	138	138	138	-0.0442056
E9Q8I9	E9Q8I9	>sp|E9Q8I9|FRY_MOUSE Protein furry homolog OS=Mus musculus (Mouse) OX=10090 GN=Fry PE=1 SV=1	FRY	10	8	-0.121108	0.000470947	0.00412593	FALSE	45	47	45	47	-0.253783
Q3UQ44	Q3UQ44	>sp|Q3UQ44|IQGA2_MOUSE Ras GTPase-activating-like protein IQGAP2 OS=Mus musculus (Mouse) OX=10090 GN=Iqgap2 PE=1 SV=2	IQGAP2	29	24	-0.108397	0.05714	0.192879	FALSE	135	133	135	133	0.0291111
Q8K2L8	Q8K2L8	>sp|Q8K2L8|TPC12_MOUSE Trafficking protein particle complex subunit 12 OS=Mus musculus (Mouse) OX=10090 GN=Trappc12 PE=1 SV=2	TRAPPC12	13	9	-4.07912e-17	1	1	FALSE	57	50	57	50	0.589237
Q9R0N0	Q9R0N0	>sp|Q9R0N0|GALK1_MOUSE Galactokinase OS=Mus musculus (Mouse) OX=10090 GN=Galk1 PE=1 SV=2	GALK1	6	6	0	1	1	FALSE	30	30	30	30	-0.0443681
Q9EPN1	Q9EPN1	>sp|Q9EPN1|NBEA_MOUSE Neurobeachin OS=Mus musculus (Mouse) OX=10090 GN=Nbea PE=1 SV=1	NBEA	42	33	-0.284849	1.80512e-08	6.98406e-07	FALSE	180	193	180	193	-0.387936
Q9Z2D8	Q9Z2D8	>sp|Q9Z2D8|MBD3_MOUSE Methyl-CpG-binding domain protein 3 OS=Mus musculus (Mouse) OX=10090 GN=Mbd3 PE=1 SV=1	MBD3	5	5	0.0320499	0.335514	0.720161	FALSE	24	25	24	25	-0.237531
A2RSJ4	A2RSJ4	>sp|A2RSJ4|UH1BL_MOUSE UHRF1-binding protein 1-like OS=Mus musculus (Mouse) OX=10090 GN=Uhrf1bp1l PE=1 SV=2	UHRF1BP1L	7	7	-0.135835	1.55442e-05	0.000241635	FALSE	33	34	33	34	-0.18621
Q9QYK9	Q9QYK9	>sp|Q9QYK9|KCC1B_MOUSE Calcium/calmodulin-dependent protein kinase type 1B OS=Mus musculus (Mouse) OX=10090 GN=Pnck PE=1 SV=1	PNCK	7	6	5.21025e-17	1	1	FALSE	33	30	33	30	0.413739
P70211	P70211	>sp|P70211|DCC_MOUSE Netrin receptor DCC OS=Mus musculus (Mouse) OX=10090 GN=Dcc PE=1 SV=2	DCC	26	19	0.0373878	0.217096	0.523972	FALSE	118	109	118	109	0.34357
A2A5R2	A2A5R2	>sp|A2A5R2|BIG2_MOUSE Brefeldin A-inhibited guanine nucleotide-exchange protein 2 OS=Mus musculus (Mouse) OX=10090 GN=Arfgef2 PE=1 SV=1	ARFGEF2	18	15	-2.64174e-18	1	1	FALSE	84	82	84	82	0.0734413
Q505D9	Q505D9	>sp|Q505D9|TRI67_MOUSE Tripartite motif-containing protein 67 OS=Mus musculus (Mouse) OX=10090 GN=Trim67 PE=2 SV=1	TRIM67	6	5	-0.111207	0.0409929	0.150432	FALSE	29	28	29	28	0.121757
Q9EQ20	Q9EQ20	>sp|Q9EQ20|MMSA_MOUSE Methylmalonate-semialdehyde dehydrogenase [acylating], mitochondrial OS=Mus musculus (Mouse) OX=10090 GN=Aldh6a1 PE=1 SV=1	ALDH6A1	18	16	-0.0576856	1.49137e-05	0.000234859	FALSE	85	84	85	84	0.0129437
Q9Z1E4	Q9Z1E4	>sp|Q9Z1E4|GYS1_MOUSE Glycogen [starch] synthase, muscle OS=Mus musculus (Mouse) OX=10090 GN=Gys1 PE=1 SV=2	GYS1	9	8	-3.06049e-18	1	1	FALSE	40	39	40	39	0.0781236
A2AMZ4	A2AMZ4	>sp|A2AMZ4|NDUF8_MOUSE NADH dehydrogenase [ubiquinone] 1 alpha subcomplex assembly factor 8 OS=Mus musculus (Mouse) OX=10090 GN=Ndufaf8 PE=1 SV=1	NDUFAF8	1	1	0.0976576	0.0690027	0.223423	FALSE	5	5	5	5	-0.046026
O54865	O54865	>sp|O54865|GCYB1_MOUSE Guanylate cyclase soluble subunit beta-1 OS=Mus musculus (Mouse) OX=10090 GN=Gucy1b1 PE=1 SV=1	GUCY1B1	16	15	3.24222e-18	1	1	FALSE	74	76	74	76	-0.174235
Q6P1I6	Q6P1I6	>sp|Q6P1I6|PSD2_MOUSE PH and SEC7 domain-containing protein 2 OS=Mus musculus (Mouse) OX=10090 GN=Psd2 PE=1 SV=1	PSD2	6	6	7.64929e-19	1	1	FALSE	29	29	29	29	-0.0428135
O89112	O89112	>sp|O89112|LANC1_MOUSE Glutathione S-transferase LANCL1 OS=Mus musculus (Mouse) OX=10090 GN=Lancl1 PE=1 SV=1	LANCL1	8	7	0.083631	0.0218297	0.0915938	FALSE	35	35	35	35	-0.0443129
Q9CQ69	Q9CQ69	>sp|Q9CQ69|QCR8_MOUSE Cytochrome b-c1 complex subunit 8 OS=Mus musculus (Mouse) OX=10090 GN=Uqcrq PE=1 SV=3	UQCRQ	2	2	0.616262	2.09132e-11	1.83218e-09	TRUE	10	10	10	10	-0.0450912
Q8BKX1	Q8BKX1	>sp|Q8BKX1|BAIP2_MOUSE Brain-specific angiogenesis inhibitor 1-associated protein 2 OS=Mus musculus (Mouse) OX=10090 GN=Baiap2 PE=1 SV=2	BAIAP2	23	22	-2.22827e-16	1	1	FALSE	108	111	108	111	-0.177769
Q6P5D3	Q6P5D3	>sp|Q6P5D3|DHX57_MOUSE Putative ATP-dependent RNA helicase DHX57 OS=Mus musculus (Mouse) OX=10090 GN=Dhx57 PE=1 SV=2	DHX57	17	12	0.0512187	0.0126683	0.0597143	FALSE	73	70	73	70	0.160467
Q61165	Q61165	>sp|Q61165|SL9A1_MOUSE Sodium/hydrogen exchanger 1 OS=Mus musculus (Mouse) OX=10090 GN=Slc9a1 PE=1 SV=1	SLC9A1	5	4	-6.92927e-18	1	1	FALSE	23	22	23	22	0.164169
Q8K0Q5	Q8K0Q5	>sp|Q8K0Q5|RHG18_MOUSE Rho GTPase-activating protein 18 OS=Mus musculus (Mouse) OX=10090 GN=Arhgap18 PE=1 SV=1	ARHGAP18	9	5	-0.124662	0.00202782	0.0136297	FALSE	30	35	30	35	-0.787282
Q8CC86	Q8CC86	>sp|Q8CC86|PNCB_MOUSE Nicotinate phosphoribosyltransferase OS=Mus musculus (Mouse) OX=10090 GN=Naprt PE=1 SV=1	NAPRT	5	2	-0.123272	0.00591229	0.0322804	FALSE	19	24	19	24	-1.14535
P17047	P17047	>sp|P17047|LAMP2_MOUSE Lysosome-associated membrane glycoprotein 2 OS=Mus musculus (Mouse) OX=10090 GN=Lamp2 PE=1 SV=2	LAMP2	7	7	-0.116189	0.0525318	0.18093	FALSE	35	35	35	35	-0.0443129
Q9D0D3	Q9D0D3	>sp|Q9D0D3|PAPD1_MOUSE Poly(A) RNA polymerase, mitochondrial OS=Mus musculus (Mouse) OX=10090 GN=Mtpap PE=1 SV=1	MTPAP	4	4	0.13775	0.000865674	0.00676735	FALSE	19	20	19	20	-0.285588
Q6GQT6	Q6GQT6	>sp|Q6GQT6|SCAP_MOUSE Sterol regulatory element-binding protein cleavage-activating protein OS=Mus musculus (Mouse) OX=10090 GN=Scap PE=1 SV=1	SCAP	7	6	0.0100628	0.505317	0.981531	FALSE	31	31	31	31	-0.0439769
G5E895	G5E895	>tr|G5E895|G5E895_MOUSE Aldo-keto reductase family 1, member B10 (aldose reductase) OS=Mus musculus (Mouse) OX=10090 GN=Akr1b10 PE=1 SV=1	AKR1B10	5	5	0.104024	0.000936649	0.00723317	FALSE	24	24	24	24	-0.0443075
Q8BFR4	Q8BFR4	>sp|Q8BFR4|GNS_MOUSE N-acetylglucosamine-6-sulfatase OS=Mus musculus (Mouse) OX=10090 GN=Gns PE=1 SV=1	GNS	11	11	-0.104995	0.0311176	0.121568	FALSE	54	55	54	55	-0.133183
Q8K010	Q8K010	>sp|Q8K010|OPLA_MOUSE 5-oxoprolinase OS=Mus musculus (Mouse) OX=10090 GN=Oplah PE=1 SV=1	OPLAH	24	23	-0.145786	4.66679e-10	2.82304e-08	FALSE	115	119	115	119	-0.211654
O54990	O54990	>sp|O54990|PROM1_MOUSE Prominin-1 OS=Mus musculus (Mouse) OX=10090 GN=Prom1 PE=1 SV=1	PROM1	8	6	-0.159028	0.0439934	0.158649	FALSE	37	37	37	37	-0.0454549
Q61316	Q61316	>sp|Q61316|HSP74_MOUSE Heat shock 70 kDa protein 4 OS=Mus musculus (Mouse) OX=10090 GN=Hspa4 PE=1 SV=1	HSPA4	34	31	-0.0502904	0.00083361	0.00658423	FALSE	164	163	164	163	-0.0138111
Q922Y1	Q922Y1	>sp|Q922Y1|UBXN1_MOUSE UBX domain-containing protein 1 OS=Mus musculus (Mouse) OX=10090 GN=Ubxn1 PE=1 SV=1	UBXN1	4	4	0	1	1	FALSE	19	20	19	20	-0.285573
P59281	P59281	>sp|P59281|RHG39_MOUSE Rho GTPase-activating protein 39 OS=Mus musculus (Mouse) OX=10090 GN=Arhgap39 PE=1 SV=2	ARHGAP39	12	10	-0.180795	0.000620099	0.00512226	FALSE	52	55	52	55	-0.315066
P70280	P70280	>sp|P70280|VAMP7_MOUSE Vesicle-associated membrane protein 7 OS=Mus musculus (Mouse) OX=10090 GN=Vamp7 PE=1 SV=1	VAMP7	6	5	1.12252e-16	1	1	FALSE	28	29	28	29	-0.213084
Q9QUG9	Q9QUG9	>sp|Q9QUG9|GRP2_MOUSE RAS guanyl-releasing protein 2 OS=Mus musculus (Mouse) OX=10090 GN=Rasgrp2 PE=1 SV=2	RASGRP2	9	7	0.287961	4.5291e-11	3.59592e-09	FALSE	42	35	42	35	0.834798
Q9R0P3	Q9R0P3	>sp|Q9R0P3|ESTD_MOUSE S-formylglutathione hydrolase OS=Mus musculus (Mouse) OX=10090 GN=Esd PE=1 SV=1	ESD	10	9	-0.0321837	0.366536	0.773245	FALSE	49	46	49	46	0.261381
Q9DCE9	Q9DCE9	>tr|Q9DCE9|Q9DCE9_MOUSE IRG-type G domain-containing protein OS=Mus musculus (Mouse) OX=10090 GN=Igtp PE=1 SV=1	IGTP	4	3	0.0983763	0.0665549	0.217881	FALSE	18	17	18	17	0.219097
Q2PFD7	Q2PFD7	>sp|Q2PFD7|PSD3_MOUSE PH and SEC7 domain-containing protein 3 OS=Mus musculus (Mouse) OX=10090 GN=Psd3 PE=1 SV=2	PSD3	18	16	-0.532157	3.04001e-12	3.33891e-10	TRUE	84	83	84	83	0.0146046
Q923Z0	Q923Z0	>sp|Q923Z0|GPC5B_MOUSE G-protein coupled receptor family C group 5 member B OS=Mus musculus (Mouse) OX=10090 GN=Gprc5b PE=1 SV=1	GPRC5B	3	2	0	1	1	FALSE	15	12	15	12	0.980299
Q9JLR1	Q9JLR1	>sp|Q9JLR1|S61A2_MOUSE Protein transport protein Sec61 subunit alpha isoform 2 OS=Mus musculus (Mouse) OX=10090 GN=Sec61a2 PE=2 SV=3	SEC61A2	3	3	0.00035769	0.926606	1	FALSE	15	15	15	15	-0.0447409
P61620	P61620	>sp|P61620|S61A1_MOUSE Protein transport protein Sec61 subunit alpha isoform 1 OS=Mus musculus (Mouse) OX=10090 GN=Sec61a1 PE=1 SV=2	SEC61A1	3	3	-1.71317e-17	1	1	FALSE	15	15	15	15	-0.0447409
Q6PDQ2	Q6PDQ2	>sp|Q6PDQ2|CHD4_MOUSE Chromodomain-helicase-DNA-binding protein 4 OS=Mus musculus (Mouse) OX=10090 GN=Chd4 PE=1 SV=1	CHD4	13	11	-0.20143	1.75328e-11	1.55389e-09	FALSE	59	59	59	59	-0.0447598
P58044	P58044	>sp|P58044|IDI1_MOUSE Isopentenyl-diphosphate Delta-isomerase 1 OS=Mus musculus (Mouse) OX=10090 GN=Idi1 PE=1 SV=1	IDI1	7	7	-8.11289e-19	1	1	FALSE	35	35	35	35	-0.0443129
P97379	P97379	>sp|P97379|G3BP2_MOUSE Ras GTPase-activating protein-binding protein 2 OS=Mus musculus (Mouse) OX=10090 GN=G3bp2 PE=1 SV=2	G3BP2	12	11	0.107661	0.00237927	0.0155931	FALSE	58	57	58	57	0.0396368
Q8BL97	Q8BL97	>sp|Q8BL97|SRSF7_MOUSE Serine/arginine-rich splicing factor 7 OS=Mus musculus (Mouse) OX=10090 GN=Srsf7 PE=1 SV=1	SRSF7	4	4	0.0408426	0.175393	0.447013	FALSE	20	20	20	20	-0.0445575
Q8BHG1	Q8BHG1	>sp|Q8BHG1|NRDC_MOUSE Nardilysin OS=Mus musculus (Mouse) OX=10090 GN=Nrdc PE=1 SV=1	NRDC	31	29	-0.0306775	0.0586501	0.197278	FALSE	152	150	152	150	0.0215518
Q8BRT1	Q8BRT1	>sp|Q8BRT1|CLAP2_MOUSE CLIP-associating protein 2 OS=Mus musculus (Mouse) OX=10090 GN=Clasp2 PE=1 SV=1	CLASP2	36	34	-0.0321448	0.275072	0.626038	FALSE	176	172	176	172	0.0686345
Q9CWM4	Q9CWM4	>sp|Q9CWM4|PFD1_MOUSE Prefoldin subunit 1 OS=Mus musculus (Mouse) OX=10090 GN=Pfdn1 PE=1 SV=1	PFDN1	3	3	0.0387613	0.26535	0.608087	FALSE	14	14	14	14	-0.0439336
Q9QYB5	Q9QYB5	>sp|Q9QYB5|ADDG_MOUSE Gamma-adducin OS=Mus musculus (Mouse) OX=10090 GN=Add3 PE=1 SV=2	ADD3	20	18	2.81775e-24	1	1	FALSE	94	93	94	93	0.00854065
Q9CWJ9	Q9CWJ9	>sp|Q9CWJ9|PUR9_MOUSE Bifunctional purine biosynthesis protein PURH OS=Mus musculus (Mouse) OX=10090 GN=Atic PE=1 SV=2	ATIC	20	20	0.000641478	0.895733	1	FALSE	100	94	100	94	0.259014
Q3UR70	Q3UR70	>sp|Q3UR70|TGFA1_MOUSE Transforming growth factor-beta receptor-associated protein 1 OS=Mus musculus (Mouse) OX=10090 GN=Tgfbrap1 PE=1 SV=1	TGFBRAP1	9	7	-0.0606727	0.0407496	0.149828	FALSE	39	39	39	39	-0.0437796
Q62351	Q62351	>sp|Q62351|TFR1_MOUSE Transferrin receptor protein 1 OS=Mus musculus (Mouse) OX=10090 GN=Tfrc PE=1 SV=1	TFRC	27	26	0.0776457	0.211862	0.515091	FALSE	134	132	134	132	0.0304348
Q9D7H3	Q9D7H3	>sp|Q9D7H3|RTCA_MOUSE RNA 3'-terminal phosphate cyclase OS=Mus musculus (Mouse) OX=10090 GN=RtcA PE=1 SV=2	RTCA	7	6	0.0823806	0.00475102	0.027166	FALSE	32	32	32	32	-0.0441113
P25444	P25444	>sp|P25444|RS2_MOUSE 40S ribosomal protein S2 OS=Mus musculus (Mouse) OX=10090 GN=Rps2 PE=1 SV=3	RPS2	10	9	0.0543101	0.0272642	0.109488	FALSE	46	48	46	48	-0.251381
Q99MR3	Q99MR3	>sp|Q99MR3|S12A9_MOUSE Solute carrier family 12 member 9 OS=Mus musculus (Mouse) OX=10090 GN=Slc12a9 PE=1 SV=2	SLC12A9	8	7	-0.121112	0.00455226	0.0262064	FALSE	38	40	38	40	-0.290246
Q9QUR6	Q9QUR6	>sp|Q9QUR6|PPCE_MOUSE Prolyl endopeptidase OS=Mus musculus (Mouse) OX=10090 GN=Prep PE=1 SV=1	PREP	28	28	3.11634e-17	1	1	FALSE	136	136	136	136	-0.0439121
O35658	O35658	>sp|O35658|C1QBP_MOUSE Complement component 1 Q subcomponent-binding protein, mitochondrial OS=Mus musculus (Mouse) OX=10090 GN=C1qbp PE=1 SV=1	C1QBP	3	3	0.184655	0.00292263	0.0183646	FALSE	15	15	15	15	-0.0447409
Q6ZPS6	Q6ZPS6	>sp|Q6ZPS6|AKIB1_MOUSE Ankyrin repeat and IBR domain-containing protein 1 OS=Mus musculus (Mouse) OX=10090 GN=Ankib1 PE=1 SV=2	ANKIB1	4	3	8.4341e-19	1	1	FALSE	19	15	19	15	1.06191
P97390	P97390	>sp|P97390|VPS45_MOUSE Vacuolar protein sorting-associated protein 45 OS=Mus musculus (Mouse) OX=10090 GN=Vps45 PE=1 SV=1	VPS45	20	17	-0.0725137	8.20179e-05	0.000989146	FALSE	95	95	95	95	-0.0443593
Q3UK10	Q3UK10	>sp|Q3UK10|B9D2_MOUSE B9 domain-containing protein 2 OS=Mus musculus (Mouse) OX=10090 GN=B9d2 PE=1 SV=2	B9D2	1	1	0	1	1	FALSE	5	5	5	5	-0.046026
P68368	P68368	>sp|P68368|TBA4A_MOUSE Tubulin alpha-4A chain OS=Mus musculus (Mouse) OX=10090 GN=Tuba4a PE=1 SV=1	TUBA4A	24	22	2.0497e-17	1	1	FALSE	114	112	114	112	0.0422857
A2AT37	A2AT37	>sp|A2AT37|RENT2_MOUSE Regulator of nonsense transcripts 2 OS=Mus musculus (Mouse) OX=10090 GN=Upf2 PE=1 SV=1	UPF2	6	4	0.0133116	0.444781	0.89073	FALSE	28	25	28	25	0.49313
Q4LDD4	Q4LDD4	>sp|Q4LDD4|ARAP1_MOUSE Arf-GAP with Rho-GAP domain, ANK repeat and PH domain-containing protein 1 OS=Mus musculus (Mouse) OX=10090 GN=Arap1 PE=1 SV=2	ARAP1	4	4	-0.0323402	0.296586	0.658252	FALSE	20	20	20	20	-0.0445575
Q9CYR6	Q9CYR6	>sp|Q9CYR6|AGM1_MOUSE Phosphoacetylglucosamine mutase OS=Mus musculus (Mouse) OX=10090 GN=Pgm3 PE=1 SV=1	PGM3	10	10	0	1	1	FALSE	50	50	50	50	-0.0442122
A0A0G2JDV3	A0A0G2JDV3	>tr|A0A0G2JDV3|A0A0G2JDV3_MOUSE GB1/RHD3-type G domain-containing protein OS=Mus musculus (Mouse) OX=10090 GN=Gbp6 PE=1 SV=1	GBP6	5	2	0	1	1	FALSE	22	17	22	17	1.16848
Q925I1	Q925I1	>sp|Q925I1|ATAD3_MOUSE ATPase family AAA domain-containing protein 3 OS=Mus musculus (Mouse) OX=10090 GN=Atad3 PE=1 SV=1	ATAD3	18	16	0.0981689	0.00501832	0.0282911	FALSE	84	87	84	87	-0.214747
Q60575	Q60575	>sp|Q60575|KIF1B_MOUSE Kinesin-like protein KIF1B OS=Mus musculus (Mouse) OX=10090 GN=Kif1b PE=1 SV=2	KIF1B	7	4	-0.253844	3.05834e-09	1.46608e-07	FALSE	23	28	23	28	-0.977735
P97372	P97372	>sp|P97372|PSME2_MOUSE Proteasome activator complex subunit 2 OS=Mus musculus (Mouse) OX=10090 GN=Psme2 PE=1 SV=4	PSME2	8	7	0.0572993	0.136054	0.372971	FALSE	37	38	37	38	-0.172499
P55012	P55012	>sp|P55012|S12A2_MOUSE Solute carrier family 12 member 2 OS=Mus musculus (Mouse) OX=10090 GN=Slc12a2 PE=1 SV=2	SLC12A2	23	19	-0.0263656	0.268844	0.614085	FALSE	109	106	109	106	0.0919406
Q8BIZ1	Q8BIZ1	>sp|Q8BIZ1|ANS1B_MOUSE Ankyrin repeat and sterile alpha motif domain-containing protein 1B OS=Mus musculus (Mouse) OX=10090 GN=Anks1b PE=1 SV=3	ANKS1B	13	12	6.93458e-17	1	1	FALSE	61	62	61	62	-0.123971
P29758	P29758	>sp|P29758|OAT_MOUSE Ornithine aminotransferase, mitochondrial OS=Mus musculus (Mouse) OX=10090 GN=Oat PE=1 SV=1	OAT	15	15	-0.09225	0.0904745	0.275288	FALSE	75	75	75	75	-0.0441328
Q3U5Q7	Q3U5Q7	>sp|Q3U5Q7|CMPK2_MOUSE UMP-CMP kinase 2, mitochondrial OS=Mus musculus (Mouse) OX=10090 GN=Cmpk2 PE=1 SV=2	CMPK2	12	10	0.0419471	0.106652	0.310624	FALSE	52	54	52	54	-0.226893
Q8C0D4	Q8C0D4	>sp|Q8C0D4|RHG12_MOUSE Rho GTPase-activating protein 12 OS=Mus musculus (Mouse) OX=10090 GN=Arhgap12 PE=1 SV=2	ARHGAP12	9	8	-0.094712	0.00420529	0.0245239	FALSE	41	44	41	44	-0.383586
Q9WTK5	Q9WTK5	>sp|Q9WTK5|NFKB2_MOUSE Nuclear factor NF-kappa-B p100 subunit OS=Mus musculus (Mouse) OX=10090 GN=Nfkb2 PE=1 SV=1	NFKB2	2	2	-1.44501e-17	1	1	FALSE	9	9	9	9	-0.0448427
Q8R191	Q8R191	>sp|Q8R191|SNG3_MOUSE Synaptogyrin-3 OS=Mus musculus (Mouse) OX=10090 GN=Syngr3 PE=1 SV=1	SYNGR3	4	3	0.0676333	0.244336	0.57244	FALSE	15	16	15	16	-0.346008
Q61102	Q61102	>sp|Q61102|ABCB7_MOUSE ATP-binding cassette sub-family B member 7, mitochondrial OS=Mus musculus (Mouse) OX=10090 GN=Abcb7 PE=1 SV=3	ABCB7	6	5	5.74625e-17	1	1	FALSE	23	23	23	23	-0.0420112
Q6P8I4	Q6P8I4	>sp|Q6P8I4|PCNP_MOUSE PEST proteolytic signal-containing nuclear protein OS=Mus musculus (Mouse) OX=10090 GN=Pcnp PE=1 SV=1	PCNP	5	4	9.66898e-14	0.999999	1	FALSE	23	24	23	24	-0.244572
P10518	P10518	>sp|P10518|HEM2_MOUSE Delta-aminolevulinic acid dehydratase OS=Mus musculus (Mouse) OX=10090 GN=Alad PE=1 SV=1	ALAD	11	8	8.79239e-19	1	1	FALSE	47	47	47	47	-0.0435805
Q5U430	Q5U430	>sp|Q5U430|UBR3_MOUSE E3 ubiquitin-protein ligase UBR3 OS=Mus musculus (Mouse) OX=10090 GN=Ubr3 PE=1 SV=3	UBR3	8	6	-0.150459	1.40927e-05	0.000225188	FALSE	30	34	30	34	-0.641618
Q78IK2	Q78IK2	>sp|Q78IK2|ATPMD_MOUSE ATP synthase membrane subunit DAPIT, mitochondrial OS=Mus musculus (Mouse) OX=10090 GN=Atp5md PE=1 SV=1	ATP5MD	3	3	0.353316	3.44904e-09	1.61773e-07	TRUE	15	15	15	15	-0.0447409
Q9CQT1	Q9CQT1	>sp|Q9CQT1|MTNA_MOUSE Methylthioribose-1-phosphate isomerase OS=Mus musculus (Mouse) OX=10090 GN=Mri1 PE=1 SV=1	MRI1	6	6	6.72665e-19	1	1	FALSE	30	30	30	30	-0.0443681
Q8CH25	Q8CH25	>sp|Q8CH25|SLTM_MOUSE SAFB-like transcription modulator OS=Mus musculus (Mouse) OX=10090 GN=Sltm PE=1 SV=1	SLTM	6	6	0	1	1	FALSE	30	30	30	30	-0.0443681
P08249	P08249	>sp|P08249|MDHM_MOUSE Malate dehydrogenase, mitochondrial OS=Mus musculus (Mouse) OX=10090 GN=Mdh2 PE=1 SV=3	MDH2	18	18	0.14339	0.000596584	0.00498047	FALSE	90	90	90	90	-0.044106
P14869	P14869	>sp|P14869|RLA0_MOUSE 60S acidic ribosomal protein P0 OS=Mus musculus (Mouse) OX=10090 GN=Rplp0 PE=1 SV=3	RPLP0	12	12	0.030857	0.253282	0.587066	FALSE	59	57	59	57	0.123624
Q6DID7	Q6DID7	>sp|Q6DID7|WLS_MOUSE Protein wntless homolog OS=Mus musculus (Mouse) OX=10090 GN=Wls PE=1 SV=1	WLS	3	3	-0.0154179	0.631113	1	FALSE	14	15	14	15	-0.362518
P54763	P54763	>sp|P54763|EPHB2_MOUSE Ephrin type-B receptor 2 OS=Mus musculus (Mouse) OX=10090 GN=Ephb2 PE=1 SV=3	EPHB2	11	8	0.0703193	0.000758987	0.00605904	FALSE	51	46	51	46	0.452611
Q9EPU0	Q9EPU0	>sp|Q9EPU0|RENT1_MOUSE Regulator of nonsense transcripts 1 OS=Mus musculus (Mouse) OX=10090 GN=Upf1 PE=1 SV=2	UPF1	34	34	-3.33104e-17	1	1	FALSE	170	169	170	169	-0.0151979
Q99MS8	Q99MS8	>sp|Q99MS8|TPGS1_MOUSE Tubulin polyglutamylase complex subunit 1 OS=Mus musculus (Mouse) OX=10090 GN=Tpgs1 PE=1 SV=1	TPGS1	3	3	-8.26988e-20	1	1	FALSE	15	15	15	15	-0.0447409
Q5SWP3	Q5SWP3	>sp|Q5SWP3|NACAD_MOUSE NAC-alpha domain-containing protein 1 OS=Mus musculus (Mouse) OX=10090 GN=Nacad PE=1 SV=1	NACAD	9	9	0.0724571	0.0397499	0.146647	FALSE	45	44	45	44	0.0642342
Q8BJD1	Q8BJD1	>sp|Q8BJD1|ITIH5_MOUSE Inter-alpha-trypsin inhibitor heavy chain H5 OS=Mus musculus (Mouse) OX=10090 GN=Itih5 PE=1 SV=1	ITIH5	6	5	-0.0409944	0.534612	1	FALSE	27	30	27	30	-0.549961
Q8CBY8	Q8CBY8	>sp|Q8CBY8|DCTN4_MOUSE Dynactin subunit 4 OS=Mus musculus (Mouse) OX=10090 GN=Dctn4 PE=1 SV=1	DCTN4	9	9	1.0974e-19	1	1	FALSE	45	45	45	45	-0.0442385
Q9D938	Q9D938	>sp|Q9D938|TM160_MOUSE Transmembrane protein 160 OS=Mus musculus (Mouse) OX=10090 GN=Tmem160 PE=2 SV=1	TMEM160	2	2	3.75433e-16	1	1	FALSE	10	10	10	10	-0.0450912
P23780	P23780	>sp|P23780|BGAL_MOUSE Beta-galactosidase OS=Mus musculus (Mouse) OX=10090 GN=Glb1 PE=1 SV=1	GLB1	15	14	-0.0907532	0.0301742	0.118949	FALSE	72	70	72	70	0.0930645
Q8R1Q8	Q8R1Q8	>sp|Q8R1Q8|DC1L1_MOUSE Cytoplasmic dynein 1 light intermediate chain 1 OS=Mus musculus (Mouse) OX=10090 GN=Dync1li1 PE=1 SV=1	DYNC1LI1	19	16	-5.02542e-19	1	1	FALSE	89	87	89	87	0.0672566
Q99L04	Q99L04	>sp|Q99L04|DHRS1_MOUSE Dehydrogenase/reductase SDR family member 1 OS=Mus musculus (Mouse) OX=10090 GN=Dhrs1 PE=1 SV=1	DHRS1	15	14	-1.79348e-17	1	1	FALSE	72	73	72	73	-0.111723
P58871	P58871	>sp|P58871|TB182_MOUSE 182 kDa tankyrase-1-binding protein OS=Mus musculus (Mouse) OX=10090 GN=Tnks1bp1 PE=1 SV=2	TNKS1BP1	16	13	-0.174999	0.000724296	0.00583571	FALSE	72	77	72	77	-0.372086
Q9D8V7	Q9D8V7	>sp|Q9D8V7|SC11C_MOUSE Signal peptidase complex catalytic subunit SEC11C OS=Mus musculus (Mouse) OX=10090 GN=Sec11c PE=1 SV=3	SEC11C	5	5	0	1	1	FALSE	24	24	24	24	-0.0436649
O08784	O08784	>sp|O08784|TCOF_MOUSE Treacle protein OS=Mus musculus (Mouse) OX=10090 GN=Tcof1 PE=1 SV=1	TCOF1	6	5	3.14079e-19	1	1	FALSE	28	27	28	27	0.12933
P11798;P28652;Q6PHZ2;Q923T9	P11798;P28652;Q6PHZ2;Q923T9	>sp|P11798|KCC2A_MOUSE Calcium/calmodulin-dependent protein kinase type II subunit alpha OS=Mus musculus (Mouse) OX=10090 GN=Camk2a PE=1 SV=2;>sp|P28652|KCC2B_MOUSE Calcium/calmodulin-dependent protein kinase type II subunit beta OS=Mus musculus (Mouse) OX=10090 GN=Camk2b PE=1 SV=2;>sp|Q6PHZ2|KCC2D_MOUSE Calcium/calmodulin-dependent protein kinase type II subunit delta OS=Mus musculus (Mouse) OX=…	CAMK2A;CAMK2B;CAMK2D;CAMK2G	2	2	-0.234587	0.00721464	0.0380028	FALSE	10	10	10	10	-0.0450912
Q9JM96	Q9JM96	>sp|Q9JM96|BORG4_MOUSE Cdc42 effector protein 4 OS=Mus musculus (Mouse) OX=10090 GN=Cdc42ep4 PE=1 SV=1	CDC42EP4	5	5	4.43951e-19	1	1	FALSE	25	24	25	24	0.150505
Q9QXL1	Q9QXL1	>sp|Q9QXL1|KI21B_MOUSE Kinesin-like protein KIF21B OS=Mus musculus (Mouse) OX=10090 GN=Kif21b PE=1 SV=2	KIF21B	22	19	-0.218485	8.82884e-14	1.49541e-11	FALSE	101	103	101	103	-0.140628
E9Q6P5	E9Q6P5	>sp|E9Q6P5|TTC7B_MOUSE Tetratricopeptide repeat protein 7B OS=Mus musculus (Mouse) OX=10090 GN=Ttc7b PE=1 SV=1	TTC7B	10	10	-8.31585e-18	1	1	FALSE	49	49	49	49	-0.0446238
Q6P9K8	Q6P9K8	>sp|Q6P9K8|CSKI1_MOUSE Caskin-1 OS=Mus musculus (Mouse) OX=10090 GN=Caskin1 PE=1 SV=2	CASKIN1	23	22	0	1	1	FALSE	114	109	114	109	0.176106
Q9Z1L5	Q9Z1L5	>sp|Q9Z1L5|CA2D3_MOUSE Voltage-dependent calcium channel subunit alpha-2/delta-3 OS=Mus musculus (Mouse) OX=10090 GN=Cacna2d3 PE=1 SV=1	CACNA2D3	18	12	0.0691626	0.0373956	0.139678	FALSE	84	75	84	75	0.51016
Q9DCW4	Q9DCW4	>sp|Q9DCW4|ETFB_MOUSE Electron transfer flavoprotein subunit beta OS=Mus musculus (Mouse) OX=10090 GN=Etfb PE=1 SV=3	ETFB	11	9	4.8917e-19	1	1	FALSE	52	52	52	52	-0.0425539
P31648	P31648	>sp|P31648|SC6A1_MOUSE Sodium- and chloride-dependent GABA transporter 1 OS=Mus musculus (Mouse) OX=10090 GN=Slc6a1 PE=1 SV=2	SLC6A1	5	4	0.355507	0.000818897	0.00648818	TRUE	22	20	22	20	0.404111
Q5SSZ5	Q5SSZ5	>sp|Q5SSZ5|TENS3_MOUSE Tensin-3 OS=Mus musculus (Mouse) OX=10090 GN=Tns3 PE=1 SV=1	TNS3	9	8	-0.059209	0.19268	0.479154	FALSE	41	41	41	41	-0.0439883
Q6PB66	Q6PB66	>sp|Q6PB66|LPPRC_MOUSE Leucine-rich PPR motif-containing protein, mitochondrial OS=Mus musculus (Mouse) OX=10090 GN=Lrpprc PE=1 SV=2	LRPPRC	52	47	0.199118	2.97848e-11	2.52347e-09	FALSE	246	240	246	240	0.0773243
Q9D7V2	Q9D7V2	>sp|Q9D7V2|LYSM2_MOUSE LysM and putative peptidoglycan-binding domain-containing protein 2 OS=Mus musculus (Mouse) OX=10090 GN=Lysmd2 PE=1 SV=2	LYSMD2	1	1	0	1	1	FALSE	5	5	5	5	-0.046026
Q7TNR9	Q7TNR9	>sp|Q7TNR9|ARHG4_MOUSE Rho guanine nucleotide exchange factor 4 OS=Mus musculus (Mouse) OX=10090 GN=Arhgef4 PE=2 SV=2	ARHGEF4	5	3	-0.148759	0.00113115	0.00848584	FALSE	22	19	22	19	0.643597
Q3V0F0	Q3V0F0	>sp|Q3V0F0|RIMB3_MOUSE RIMS-binding protein 3 OS=Mus musculus (Mouse) OX=10090 GN=Rimbp3 PE=1 SV=2	RIMBP3	2	1	0.104017	0.0560152	0.190008	FALSE	9	6	9	6	1.71909
Q91XV3	Q91XV3	>sp|Q91XV3|BASP1_MOUSE Brain acid soluble protein 1 OS=Mus musculus (Mouse) OX=10090 GN=Basp1 PE=1 SV=3	BASP1	8	7	0.178141	0.0256273	0.10401	FALSE	37	37	37	37	-0.0462642
Q9QXL2	Q9QXL2	>sp|Q9QXL2|KI21A_MOUSE Kinesin-like protein KIF21A OS=Mus musculus (Mouse) OX=10090 GN=Kif21a PE=1 SV=2	KIF21A	20	19	-0.0498994	0.207123	0.506802	FALSE	96	97	96	97	-0.0945838
P70297	P70297	>sp|P70297|STAM1_MOUSE Signal transducing adapter molecule 1 OS=Mus musculus (Mouse) OX=10090 GN=Stam PE=1 SV=3	STAM	10	10	0.08286	0.0332671	0.127803	FALSE	50	49	50	49	0.0530297
Q9DBX2	Q9DBX2	>sp|Q9DBX2|PHLP_MOUSE Phosducin-like protein OS=Mus musculus (Mouse) OX=10090 GN=Pdcl PE=1 SV=1	PDCL	4	4	0.148326	1.43992e-05	0.000229125	FALSE	20	20	20	20	-0.0445575
P62270	P62270	>sp|P62270|RS18_MOUSE 40S ribosomal protein S18 OS=Mus musculus (Mouse) OX=10090 GN=Rps18 PE=1 SV=3	RPS18	8	8	0.0335701	0.22857	0.544255	FALSE	40	40	40	40	-0.0442712
Q8R035	Q8R035	>sp|Q8R035|ICT1_MOUSE Peptidyl-tRNA hydrolase ICT1, mitochondrial OS=Mus musculus (Mouse) OX=10090 GN=Mrpl58 PE=1 SV=1	MRPL58	3	3	0.228832	0.000306035	0.00292673	FALSE	15	14	15	14	0.272213
Q99J08	Q99J08	>sp|Q99J08|S14L2_MOUSE SEC14-like protein 2 OS=Mus musculus (Mouse) OX=10090 GN=Sec14l2 PE=1 SV=1	SEC14L2	6	6	-0.0102286	0.661716	1	FALSE	30	28	30	28	0.28395
Q9JLB0	Q9JLB0	>sp|Q9JLB0|MPP6_MOUSE MAGUK p55 subfamily member 6 OS=Mus musculus (Mouse) OX=10090 GN=Mpp6 PE=1 SV=1	MPP6	19	19	-0.0364723	0.185355	0.46611	FALSE	93	95	93	95	-0.148494
Q6PDI5	Q6PDI5	>sp|Q6PDI5|ECM29_MOUSE Proteasome adapter and scaffold protein ECM29 OS=Mus musculus (Mouse) OX=10090 GN=Ecpas PE=1 SV=3	ECPAS	40	37	-0.0378647	0.0448685	0.161087	FALSE	192	191	192	191	-0.0189194
Q99K46	Q99K46	>sp|Q99K46|UBP11_MOUSE Ubiquitin carboxyl-terminal hydrolase 11 OS=Mus musculus (Mouse) OX=10090 GN=Usp11 PE=1 SV=4	USP11	15	13	-0.0303636	0.0506541	0.176656	FALSE	68	68	68	68	-0.0431132
Q08274	Q08274	>sp|Q08274|DMWD_MOUSE Dystrophia myotonica WD repeat-containing protein OS=Mus musculus (Mouse) OX=10090 GN=Dmwd PE=1 SV=3	DMWD	2	1	0.169331	0.104135	0.305102	FALSE	8	9	8	9	-0.56873
Q3UMC0	Q3UMC0	>sp|Q3UMC0|AFG2H_MOUSE ATPase family protein 2 homolog OS=Mus musculus (Mouse) OX=10090 GN=Spata5 PE=1 SV=2	SPATA5	8	7	0	1	1	FALSE	40	37	40	37	0.330292
P68134	P68134	>sp|P68134|ACTS_MOUSE Actin, alpha skeletal muscle OS=Mus musculus (Mouse) OX=10090 GN=Acta1 PE=1 SV=1	ACTA1	17	16	1.53149e-17	1	1	FALSE	81	81	81	81	-0.0436592
P98063	P98063	>sp|P98063|BMP1_MOUSE Bone morphogenetic protein 1 OS=Mus musculus (Mouse) OX=10090 GN=Bmp1 PE=1 SV=2	BMP1	6	6	-0.0360606	0.335254	0.720039	FALSE	29	29	29	29	-0.0444877
Q5U458	Q5U458	>sp|Q5U458|DJC11_MOUSE DnaJ homolog subfamily C member 11 OS=Mus musculus (Mouse) OX=10090 GN=Dnajc11 PE=1 SV=2	DNAJC11	13	11	0.122076	2.60714e-05	0.000370739	FALSE	59	56	59	56	0.208479
F2Z3U3	F2Z3U3	>tr|F2Z3U3|F2Z3U3_MOUSE Ras association (RalGDS/AF-6) and pleckstrin homology domains 1 OS=Mus musculus (Mouse) OX=10090 GN=Raph1 PE=1 SV=2	RAPH1	20	17	0.0442821	0.170771	0.438422	FALSE	91	94	91	94	-0.202386
Q8VI75	Q8VI75	>sp|Q8VI75|IPO4_MOUSE Importin-4 OS=Mus musculus (Mouse) OX=10090 GN=Ipo4 PE=1 SV=1	IPO4	19	18	-0.0528834	0.108388	0.314477	FALSE	88	86	88	86	0.0685851
Q9CQF9	Q9CQF9	>sp|Q9CQF9|PCYOX_MOUSE Prenylcysteine oxidase OS=Mus musculus (Mouse) OX=10090 GN=Pcyox1 PE=1 SV=1	PCYOX1	14	13	-0.0485745	0.000739942	0.00593667	FALSE	67	69	67	69	-0.188051
Q80TL7	Q80TL7	>sp|Q80TL7|MON2_MOUSE Protein MON2 homolog OS=Mus musculus (Mouse) OX=10090 GN=Mon2 PE=1 SV=2	MON2	22	20	-1.96755e-18	1	1	FALSE	102	106	102	106	-0.231661
Q9JIA1	Q9JIA1	>sp|Q9JIA1|LGI1_MOUSE Leucine-rich glioma-inactivated protein 1 OS=Mus musculus (Mouse) OX=10090 GN=Lgi1 PE=1 SV=1	LGI1	12	10	-4.3834e-18	1	1	FALSE	56	55	56	55	0.0421737
Q60875	Q60875	>sp|Q60875|ARHG2_MOUSE Rho guanine nucleotide exchange factor 2 OS=Mus musculus (Mouse) OX=10090 GN=Arhgef2 PE=1 SV=4	ARHGEF2	23	22	-0.119605	3.71419e-08	1.32288e-06	FALSE	111	111	111	111	-0.0430991
Q8K224	Q8K224	>sp|Q8K224|NAT10_MOUSE RNA cytidine acetyltransferase OS=Mus musculus (Mouse) OX=10090 GN=Nat10 PE=1 SV=1	NAT10	10	9	0.00462359	0.695322	1	FALSE	47	48	47	48	-0.14584
Q9EPL4	Q9EPL4	>sp|Q9EPL4|METL9_MOUSE Methyltransferase-like protein 9 OS=Mus musculus (Mouse) OX=10090 GN=Mettl9 PE=1 SV=1	METTL9	3	3	-0.00708451	0.705461	1	FALSE	15	15	15	15	-0.0447409
Q62210	Q62210	>sp|Q62210|BIRC2_MOUSE Baculoviral IAP repeat-containing protein 2 OS=Mus musculus (Mouse) OX=10090 GN=Birc2 PE=1 SV=1	BIRC2	5	3	0.0580096	0.150254	0.400853	FALSE	22	19	22	19	0.648022
O55100	O55100	>sp|O55100|SNG1_MOUSE Synaptogyrin-1 OS=Mus musculus (Mouse) OX=10090 GN=Syngr1 PE=1 SV=2	SYNGR1	2	2	-3.12004e-16	1	1	FALSE	10	10	10	10	-0.0450912
Q9Z0N1	Q9Z0N1	>sp|Q9Z0N1|IF2G_MOUSE Eukaryotic translation initiation factor 2 subunit 3, X-linked OS=Mus musculus (Mouse) OX=10090 GN=Eif2s3x PE=1 SV=2	EIF2S3X	4	4	-1.50422e-18	1	1	FALSE	19	20	19	20	-0.284769
Q8K1R7	Q8K1R7	>sp|Q8K1R7|NEK9_MOUSE Serine/threonine-protein kinase Nek9 OS=Mus musculus (Mouse) OX=10090 GN=Nek9 PE=1 SV=2	NEK9	11	11	-0.0722628	0.0944237	0.284578	FALSE	53	54	53	54	-0.135757
Q8VHW2	Q8VHW2	>sp|Q8VHW2|CCG8_MOUSE Voltage-dependent calcium channel gamma-8 subunit OS=Mus musculus (Mouse) OX=10090 GN=Cacng8 PE=1 SV=1	CACNG8	3	3	-0.0398614	0.355195	0.753912	FALSE	14	15	14	15	-0.362518
Q80TJ1	Q80TJ1	>sp|Q80TJ1|CAPS1_MOUSE Calcium-dependent secretion activator 1 OS=Mus musculus (Mouse) OX=10090 GN=Cadps PE=1 SV=3	CADPS	43	38	0.0411145	0.358488	0.759632	FALSE	200	196	200	196	0.0545565
Q3TIX6	Q3TIX6	>tr|Q3TIX6|Q3TIX6_MOUSE Far upstream element (FUSE)-binding protein 3 OS=Mus musculus (Mouse) OX=10090 GN=Fubp3 PE=1 SV=1	FUBP3	14	11	-0.0691347	0.118843	0.337363	FALSE	65	62	65	62	0.185596
O09061	O09061	>sp|O09061|PSB1_MOUSE Proteasome subunit beta type-1 OS=Mus musculus (Mouse) OX=10090 GN=Psmb1 PE=1 SV=1	PSMB1	11	10	-2.333e-18	1	1	FALSE	53	54	53	54	-0.133961
Q8BNU0	Q8BNU0	>sp|Q8BNU0|ARMC6_MOUSE Armadillo repeat-containing protein 6 OS=Mus musculus (Mouse) OX=10090 GN=Armc6 PE=1 SV=1	ARMC6	13	12	0.0451819	0.0348449	0.132463	FALSE	60	62	60	62	-0.203931
P54797	P54797	>sp|P54797|TNG2_MOUSE Transport and Golgi organization 2 homolog OS=Mus musculus (Mouse) OX=10090 GN=Tango2 PE=1 SV=1	TANGO2	4	4	0.0274169	0.289381	0.64807	FALSE	20	19	20	19	0.196624
Q9EQG7	Q9EQG7	>sp|Q9EQG7|ENPP5_MOUSE Ectonucleotide pyrophosphatase/phosphodiesterase family member 5 OS=Mus musculus (Mouse) OX=10090 GN=Enpp5 PE=1 SV=3	ENPP5	6	6	-0.0693856	0.00497675	0.0281035	FALSE	30	30	30	30	-0.0443681
Q9D8L5	Q9D8L5	>sp|Q9D8L5|CCD91_MOUSE Coiled-coil domain-containing protein 91 OS=Mus musculus (Mouse) OX=10090 GN=Ccdc91 PE=1 SV=2	CCDC91	4	2	-3.11377e-17	1	1	FALSE	14	14	14	14	-0.0468093
Q8CAY6	Q8CAY6	>sp|Q8CAY6|THIC_MOUSE Acetyl-CoA acetyltransferase, cytosolic OS=Mus musculus (Mouse) OX=10090 GN=Acat2 PE=1 SV=2	ACAT2	10	7	-0.200025	1.86764e-05	0.000279669	FALSE	40	42	40	42	-0.283244
Q3V1N5	Q3V1N5	>tr|Q3V1N5|Q3V1N5_MOUSE Headcase domain-containing protein OS=Mus musculus (Mouse) OX=10090 GN=Heca PE=1 SV=1	HECA	2	2	-0.0907196	0.058337	0.196419	FALSE	8	8	8	8	-0.0480086
A2AJL3	A2AJL3	>sp|A2AJL3|FGGY_MOUSE FGGY carbohydrate kinase domain-containing protein OS=Mus musculus (Mouse) OX=10090 GN=Fggy PE=1 SV=1	FGGY	1	1	0.0280427	0.445008	0.890951	FALSE	5	5	5	5	-0.046026
Q920A5	Q920A5	>sp|Q920A5|RISC_MOUSE Retinoid-inducible serine carboxypeptidase OS=Mus musculus (Mouse) OX=10090 GN=Scpep1 PE=1 SV=2	SCPEP1	10	9	-0.0997868	0.236916	0.558199	FALSE	47	47	47	47	-0.0443015
Q8BYL4	Q8BYL4	>sp|Q8BYL4|SYYM_MOUSE Tyrosine--tRNA ligase, mitochondrial OS=Mus musculus (Mouse) OX=10090 GN=Yars2 PE=1 SV=2	YARS2	6	6	0.103232	0.029143	0.115697	FALSE	29	29	29	29	-0.0442514
Q91W43	Q91W43	>sp|Q91W43|GCSP_MOUSE Glycine dehydrogenase (decarboxylating), mitochondrial OS=Mus musculus (Mouse) OX=10090 GN=Gldc PE=1 SV=1	GLDC	14	13	-1.9847e-16	1	1	FALSE	66	68	66	68	-0.190218
Q9D6E4	Q9D6E4	>sp|Q9D6E4|TTC9B_MOUSE Tetratricopeptide repeat protein 9B OS=Mus musculus (Mouse) OX=10090 GN=Ttc9b PE=1 SV=1	TTC9B	4	2	0	1	1	FALSE	11	13	11	13	-0.809148
Q8QZS1	Q8QZS1	>sp|Q8QZS1|HIBCH_MOUSE 3-hydroxyisobutyryl-CoA hydrolase, mitochondrial OS=Mus musculus (Mouse) OX=10090 GN=Hibch PE=1 SV=1	HIBCH	17	14	0	1	1	FALSE	78	75	78	75	0.147201
B2RXC1	B2RXC1	>sp|B2RXC1|TPC11_MOUSE Trafficking protein particle complex subunit 11 OS=Mus musculus (Mouse) OX=10090 GN=Trappc11 PE=1 SV=1	TRAPPC11	9	9	-0.0409924	0.0505668	0.176475	FALSE	45	44	45	44	0.0636908
Q9JKF6	Q9JKF6	>sp|Q9JKF6|NECT1_MOUSE Nectin-1 OS=Mus musculus (Mouse) OX=10090 GN=Nectin1 PE=1 SV=3	NECTIN1	7	5	0.354571	0.000135774	0.00150418	TRUE	33	32	33	32	0.10013
P50247	P50247	>sp|P50247|SAHH_MOUSE Adenosylhomocysteinase OS=Mus musculus (Mouse) OX=10090 GN=Ahcy PE=1 SV=3	AHCY	15	15	6.82481e-17	1	1	FALSE	73	74	73	74	-0.110479
Q9WTX6	Q9WTX6	>sp|Q9WTX6|CUL1_MOUSE Cullin-1 OS=Mus musculus (Mouse) OX=10090 GN=Cul1 PE=1 SV=1	CUL1	28	26	0.0341468	0.0187999	0.0809108	FALSE	136	132	136	132	0.102184
Q61315	Q61315	>sp|Q61315|APC_MOUSE Adenomatous polyposis coli protein OS=Mus musculus (Mouse) OX=10090 GN=Apc PE=1 SV=1	APC	27	19	0	1	1	FALSE	112	109	112	109	0.0879326
Q91XC9	Q91XC9	>sp|Q91XC9|PEX16_MOUSE Peroxisomal membrane protein PEX16 OS=Mus musculus (Mouse) OX=10090 GN=Pex16 PE=1 SV=2	PEX16	3	3	0.136225	0.00579094	0.0317543	FALSE	15	15	15	15	-0.0447409
Q80W04	Q80W04	>sp|Q80W04|TMCC2_MOUSE Transmembrane and coiled-coil domains protein 2 OS=Mus musculus (Mouse) OX=10090 GN=Tmcc2 PE=1 SV=1	TMCC2	3	3	0.0846196	0.0996499	0.295193	FALSE	15	12	15	12	0.979714
Q80VP0	Q80VP0	>sp|Q80VP0|TCPR1_MOUSE Tectonin beta-propeller repeat-containing protein 1 OS=Mus musculus (Mouse) OX=10090 GN=Tecpr1 PE=1 SV=1	TECPR1	15	12	1.33066e-17	1	1	FALSE	65	70	65	70	-0.403334
G3UYY4	G3UYY4	>tr|G3UYY4|G3UYY4_MOUSE TPR_REGION domain-containing protein OS=Mus musculus (Mouse) OX=10090 GN=Ttc6 PE=4 SV=1	TTC6	1	1	0	1	1	FALSE	5	4	5	4	0.855924
P97310	P97310	>sp|P97310|MCM2_MOUSE DNA replication licensing factor MCM2 OS=Mus musculus (Mouse) OX=10090 GN=Mcm2 PE=1 SV=3	MCM2	9	8	0	1	1	FALSE	45	42	45	42	0.289173
P13020	P13020	>sp|P13020|GELS_MOUSE Gelsolin OS=Mus musculus (Mouse) OX=10090 GN=Gsn PE=1 SV=3	GSN	9	9	5.79239e-17	1	1	FALSE	44	43	44	43	0.0669887
P53026	P53026	>sp|P53026|RL10A_MOUSE 60S ribosomal protein L10a OS=Mus musculus (Mouse) OX=10090 GN=Rpl10a PE=1 SV=3	RPL10A	10	9	0.0384355	0.166021	0.430265	FALSE	45	45	45	45	-0.0442385
Q80YA7	Q80YA7	>sp|Q80YA7|DPP8_MOUSE Dipeptidyl peptidase 8 OS=Mus musculus (Mouse) OX=10090 GN=Dpp8 PE=1 SV=1	DPP8	12	11	-0.126058	2.42055e-05	0.000348103	FALSE	57	56	57	56	0.0426147
Q8BVG4	Q8BVG4	>sp|Q8BVG4|DPP9_MOUSE Dipeptidyl peptidase 9 OS=Mus musculus (Mouse) OX=10090 GN=Dpp9 PE=1 SV=2	DPP9	8	7	-5.95724e-19	1	1	FALSE	35	35	35	35	-0.0452768
A0A2I3BQ48	A0A2I3BQ48	>tr|A0A2I3BQ48|A0A2I3BQ48_MOUSE Diacylglycerol kinase OS=Mus musculus (Mouse) OX=10090 GN=Dgkh PE=1 SV=1	DGKH	8	4	0	1	1	FALSE	28	32	28	32	-0.682255
O70161	O70161	>sp|O70161|PI51C_MOUSE Phosphatidylinositol 4-phosphate 5-kinase type-1 gamma OS=Mus musculus (Mouse) OX=10090 GN=Pip5k1c PE=1 SV=2	PIP5K1C	15	11	-0.027372	0.376261	0.78744	FALSE	62	67	62	67	-0.422255
P70697	P70697	>sp|P70697|DCUP_MOUSE Uroporphyrinogen decarboxylase OS=Mus musculus (Mouse) OX=10090 GN=Urod PE=1 SV=2	UROD	7	7	0.0260146	0.334257	0.718474	FALSE	34	33	34	33	0.0975184
P12658	P12658	>sp|P12658|CALB1_MOUSE Calbindin OS=Mus musculus (Mouse) OX=10090 GN=Calb1 PE=1 SV=2	CALB1	14	13	-7.8273e-17	1	1	FALSE	68	66	68	66	0.102255
P52825	P52825	>sp|P52825|CPT2_MOUSE Carnitine O-palmitoyltransferase 2, mitochondrial OS=Mus musculus (Mouse) OX=10090 GN=Cpt2 PE=1 SV=2	CPT2	14	13	-0.0626609	0.172265	0.441347	FALSE	67	68	67	68	-0.117017
Q80ZU0	Q80ZU0	>sp|Q80ZU0|ARL5A_MOUSE ADP-ribosylation factor-like protein 5A OS=Mus musculus (Mouse) OX=10090 GN=Arl5a PE=1 SV=1	ARL5A	2	2	0.135056	0.0147389	0.0671459	FALSE	10	9	10	9	0.428883
E9PVD3	E9PVD3	>sp|E9PVD3|PCD16_MOUSE Protocadherin-16 OS=Mus musculus (Mouse) OX=10090 GN=Dchs1 PE=1 SV=1	DCHS1	1	1	0.0822657	0.173633	0.443806	FALSE	4	5	4	5	-0.947607
Q61578	Q61578	>sp|Q61578|ADRO_MOUSE NADPH:adrenodoxin oxidoreductase, mitochondrial OS=Mus musculus (Mouse) OX=10090 GN=Fdxr PE=1 SV=1	FDXR	12	11	7.57005e-18	1	1	FALSE	60	57	60	57	0.205011
Q8CH18	Q8CH18	>sp|Q8CH18|CCAR1_MOUSE Cell division cycle and apoptosis regulator protein 1 OS=Mus musculus (Mouse) OX=10090 GN=Ccar1 PE=1 SV=1	CCAR1	13	11	1.53532e-18	1	1	FALSE	59	63	59	63	-0.363273
Q9WVI9	Q9WVI9	>sp|Q9WVI9|JIP1_MOUSE C-Jun-amino-terminal kinase-interacting protein 1 OS=Mus musculus (Mouse) OX=10090 GN=Mapk8ip1 PE=1 SV=2	MAPK8IP1	6	5	1.67817e-16	1	1	FALSE	29	28	29	28	0.124795
Q571I9	Q571I9	>sp|Q571I9|A16A1_MOUSE Aldehyde dehydrogenase family 16 member A1 OS=Mus musculus (Mouse) OX=10090 GN=Aldh16a1 PE=1 SV=2	ALDH16A1	3	2	0	1	1	FALSE	13	13	13	13	-0.0482018
Q7TNL5	Q7TNL5	>tr|Q7TNL5|Q7TNL5_MOUSE Serine/threonine-protein phosphatase 2A 56 kDa regulatory subunit OS=Mus musculus (Mouse) OX=10090 GN=Ppp2r5d PE=1 SV=1	PPP2R5D	19	17	0.0547427	0.0101499	0.0499437	FALSE	92	92	92	92	-0.0439411
Q80TR1	Q80TR1	>sp|Q80TR1|AGRL1_MOUSE Adhesion G protein-coupled receptor L1 OS=Mus musculus (Mouse) OX=10090 GN=Adgrl1 PE=1 SV=2	ADGRL1	19	16	0.184896	0.000846304	0.00665222	FALSE	89	89	89	89	-0.044315
Q3U487	Q3U487	>sp|Q3U487|HECD3_MOUSE E3 ubiquitin-protein ligase HECTD3 OS=Mus musculus (Mouse) OX=10090 GN=Hectd3 PE=1 SV=2	HECTD3	15	14	0.0195265	0.257538	0.594474	FALSE	72	72	72	72	-0.0439284
Q791T5	Q791T5	>sp|Q791T5|MTCH1_MOUSE Mitochondrial carrier homolog 1 OS=Mus musculus (Mouse) OX=10090 GN=Mtch1 PE=1 SV=1	MTCH1	9	9	0.255162	1.06048e-05	0.000174202	FALSE	45	44	45	44	0.0649932
Q61147	Q61147	>sp|Q61147|CERU_MOUSE Ceruloplasmin OS=Mus musculus (Mouse) OX=10090 GN=Cp PE=1 SV=2	CP	18	14	2.61284e-17	1	1	FALSE	85	79	85	79	0.314137
P0C0S6;P27661;Q3THW5;Q64523;Q6GSS7	P0C0S6;P27661;Q3THW5;Q64523;Q6GSS7	>sp|P0C0S6|H2AZ_MOUSE Histone H2A.Z OS=Mus musculus (Mouse) OX=10090 GN=H2az1 PE=1 SV=2;>sp|P27661|H2AX_MOUSE Histone H2AX OS=Mus musculus (Mouse) OX=10090 GN=H2afx PE=1 SV=2;>sp|Q3THW5|H2AV_MOUSE Histone H2A.V OS=Mus musculus (Mouse) OX=10090 GN=H2afv PE=1 SV=3;>sp|Q64523|H2A2C_MOUSE Histone H2A type 2-C OS=Mus musculus (Mouse) OX=10090 GN=Hist2h2ac PE=1 SV=3;>sp|Q6GSS7|H2A2A_MOUSE Histone H2A t…	H2AZ1;H2AFX;H2AFV;HIST2H2AC;HIST2H2AA1	1	1	0	1	1	FALSE	5	5	5	5	-0.046026
Q9JIY5	Q9JIY5	>sp|Q9JIY5|HTRA2_MOUSE Serine protease HTRA2, mitochondrial OS=Mus musculus (Mouse) OX=10090 GN=Htra2 PE=1 SV=2	HTRA2	6	5	0.0623302	0.0566163	0.191366	FALSE	28	29	28	29	-0.214136
Q62417	Q62417	>sp|Q62417|SRBS1_MOUSE Sorbin and SH3 domain-containing protein 1 OS=Mus musculus (Mouse) OX=10090 GN=Sorbs1 PE=1 SV=2	SORBS1	30	26	-0.0515427	0.0481662	0.170201	FALSE	139	139	139	139	-0.0435768
E9Q3L2	E9Q3L2	>sp|E9Q3L2|PI4KA_MOUSE Phosphatidylinositol 4-kinase alpha OS=Mus musculus (Mouse) OX=10090 GN=Pi4ka PE=1 SV=2	PI4KA	41	35	-0.213953	0.00870538	0.0441173	FALSE	184	193	184	193	-0.277685
Q61235	Q61235	>sp|Q61235|SNTB2_MOUSE Beta-2-syntrophin OS=Mus musculus (Mouse) OX=10090 GN=Sntb2 PE=1 SV=2	SNTB2	5	3	-0.13429	0.0287937	0.114544	FALSE	20	24	20	24	-0.905044
Q9D0Q7	Q9D0Q7	>sp|Q9D0Q7|RM45_MOUSE 39S ribosomal protein L45, mitochondrial OS=Mus musculus (Mouse) OX=10090 GN=Mrpl45 PE=1 SV=1	MRPL45	5	5	0.232847	6.59117e-08	2.16543e-06	FALSE	25	25	25	25	-0.0444446
Q8R502	Q8R502	>sp|Q8R502|LRC8C_MOUSE Volume-regulated anion channel subunit LRRC8C OS=Mus musculus (Mouse) OX=10090 GN=Lrrc8c PE=1 SV=1	LRRC8C	10	9	-0.0481878	0.0965344	0.288317	FALSE	48	49	48	49	-0.144219
A2AAE1	A2AAE1	>sp|A2AAE1|K1109_MOUSE Transmembrane protein KIAA1109 OS=Mus musculus (Mouse) OX=10090 GN=Kiaa1109 PE=1 SV=4	KIAA1109	9	4	-0.160763	7.24005e-06	0.00012373	FALSE	31	42	31	42	-1.49991
E9PUQ8	E9PUQ8	>tr|E9PUQ8|E9PUQ8_MOUSE Diacylglycerol kinase OS=Mus musculus (Mouse) OX=10090 GN=Dgkd PE=1 SV=1	DGKD	4	3	-1.99732e-14	1	1	FALSE	16	17	16	17	-0.324338
Q8BGD5	Q8BGD5	>sp|Q8BGD5|CPT1C_MOUSE Carnitine O-palmitoyltransferase 1, brain isoform OS=Mus musculus (Mouse) OX=10090 GN=Cpt1c PE=1 SV=1	CPT1C	7	7	-0.0588326	0.0266972	0.107664	FALSE	33	35	33	35	-0.328962
Q9Z2A0	Q9Z2A0	>sp|Q9Z2A0|PDPK1_MOUSE 3-phosphoinositide-dependent protein kinase 1 OS=Mus musculus (Mouse) OX=10090 GN=Pdpk1 PE=1 SV=2	PDPK1	9	9	-0.0569267	0.00441028	0.0255047	FALSE	45	45	45	45	-0.0442385
P14148	P14148	>sp|P14148|RL7_MOUSE 60S ribosomal protein L7 OS=Mus musculus (Mouse) OX=10090 GN=Rpl7 PE=1 SV=2	RPL7	14	14	0.0573509	0.0100826	0.0496766	FALSE	69	69	69	69	-0.04352
Q9JI10;Q9JI11	Q9JI10;Q9JI11	>sp|Q9JI10|STK3_MOUSE Serine/threonine-protein kinase 3 OS=Mus musculus (Mouse) OX=10090 GN=Stk3 PE=1 SV=1;>sp|Q9JI11|STK4_MOUSE Serine/threonine-protein kinase 4 OS=Mus musculus (Mouse) OX=10090 GN=Stk4 PE=1 SV=1	STK3;STK4	5	5	-0.170197	1.76194e-05	0.000269421	FALSE	24	25	24	25	-0.238174
Q6ZQ29	Q6ZQ29	>sp|Q6ZQ29|TAOK2_MOUSE Serine/threonine-protein kinase TAO2 OS=Mus musculus (Mouse) OX=10090 GN=Taok2 PE=1 SV=3	TAOK2	10	7	0.171187	0.000314427	0.00298451	FALSE	46	40	46	40	0.630648
Q5F2E8;Q8BYC6	Q5F2E8;Q8BYC6	>sp|Q5F2E8|TAOK1_MOUSE Serine/threonine-protein kinase TAO1 OS=Mus musculus (Mouse) OX=10090 GN=Taok1 PE=1 SV=1;>sp|Q8BYC6|TAOK3_MOUSE Serine/threonine-protein kinase TAO3 OS=Mus musculus (Mouse) OX=10090 GN=Taok3 PE=1 SV=2	TAOK1;TAOK3	1	1	-0.0188517	0.556863	1	FALSE	5	5	5	5	-0.046026
P67984	P67984	>sp|P67984|RL22_MOUSE 60S ribosomal protein L22 OS=Mus musculus (Mouse) OX=10090 GN=Rpl22 PE=1 SV=2	RPL22	2	2	0.0909909	0.369641	0.777	FALSE	10	10	10	10	-0.0450912
P97742	P97742	>sp|P97742|CPT1A_MOUSE Carnitine O-palmitoyltransferase 1, liver isoform OS=Mus musculus (Mouse) OX=10090 GN=Cpt1a PE=1 SV=4	CPT1A	13	12	-0.205365	2.63482e-05	0.000373818	FALSE	62	64	62	64	-0.199189
P46467	P46467	>sp|P46467|VPS4B_MOUSE Vacuolar protein sorting-associated protein 4B OS=Mus musculus (Mouse) OX=10090 GN=Vps4b PE=1 SV=2	VPS4B	3	3	-8.12413e-17	1	1	FALSE	15	15	15	15	-0.0447409
Q99P47	Q99P47	>sp|Q99P47|CNTP4_MOUSE Contactin-associated protein-like 4 OS=Mus musculus (Mouse) OX=10090 GN=Cntnap4 PE=1 SV=2	CNTNAP4	14	11	0.137602	0.0188503	0.0809902	FALSE	67	62	67	62	0.333399
Q3UM29	Q3UM29	>sp|Q3UM29|COG7_MOUSE Conserved oligomeric Golgi complex subunit 7 OS=Mus musculus (Mouse) OX=10090 GN=Cog7 PE=1 SV=1	COG7	10	9	-0.0152911	0.266816	0.610713	FALSE	47	48	47	48	-0.146697
Q99KI3	Q99KI3	>sp|Q99KI3|EMC3_MOUSE ER membrane protein complex subunit 3 OS=Mus musculus (Mouse) OX=10090 GN=Emc3 PE=1 SV=3	EMC3	5	5	4.02137e-15	1	1	FALSE	25	25	25	25	-0.0444446
Q0PHV7	Q0PHV7	>sp|Q0PHV7|DACT3_MOUSE Dapper homolog 3 OS=Mus musculus (Mouse) OX=10090 GN=Dact3 PE=1 SV=1	DACT3	3	2	0.128527	0.0322175	0.124714	FALSE	11	11	11	11	-0.0440323
Q6P9S0	Q6P9S0	>sp|Q6P9S0|MTSS2_MOUSE Protein MTSS 2 OS=Mus musculus (Mouse) OX=10090 GN=Mtss2 PE=1 SV=1	MTSS2	6	6	0.226159	2.38837e-10	1.54272e-08	FALSE	30	29	30	29	0.117468
Q7TMK9	Q7TMK9	>sp|Q7TMK9|HNRPQ_MOUSE Heterogeneous nuclear ribonucleoprotein Q OS=Mus musculus (Mouse) OX=10090 GN=Syncrip PE=1 SV=2	SYNCRIP	17	17	1.9237e-17	1	1	FALSE	84	84	84	84	-0.0442187
P05480	P05480	>sp|P05480|SRC_MOUSE Neuronal proto-oncogene tyrosine-protein kinase Src OS=Mus musculus (Mouse) OX=10090 GN=Src PE=1 SV=4	SRC	10	9	0.114417	4.93829e-08	1.68788e-06	FALSE	48	43	48	43	0.48743
O55125	O55125	>sp|O55125|NIPS1_MOUSE Protein NipSnap homolog 1 OS=Mus musculus (Mouse) OX=10090 GN=Nipsnap1 PE=1 SV=1	NIPSNAP1	6	5	0.244546	1.52384e-05	0.000238006	FALSE	28	28	28	28	-0.0446528
Q8CIP5	Q8CIP5	>sp|Q8CIP5|DISP2_MOUSE Protein dispatched homolog 2 OS=Mus musculus (Mouse) OX=10090 GN=Disp2 PE=1 SV=1	DISP2	4	3	0	1	1	FALSE	17	19	17	19	-0.565219
Q64520	Q64520	>sp|Q64520|KGUA_MOUSE Guanylate kinase OS=Mus musculus (Mouse) OX=10090 GN=Guk1 PE=1 SV=2	GUK1	6	6	2.0923e-18	1	1	FALSE	30	29	30	29	0.118607
Q9WVS7	Q9WVS7	>sp|Q9WVS7|MP2K5_MOUSE Dual specificity mitogen-activated protein kinase kinase 5 OS=Mus musculus (Mouse) OX=10090 GN=Map2k5 PE=1 SV=1	MAP2K5	4	3	-4.33145e-18	1	1	FALSE	20	18	20	18	0.451626
Q8BH66	Q8BH66	>sp|Q8BH66|ATLA1_MOUSE Atlastin-1 OS=Mus musculus (Mouse) OX=10090 GN=Atl1 PE=1 SV=1	ATL1	17	15	-0.050499	0.212142	0.515443	FALSE	81	80	81	80	0.0161377
Q8BHP7	Q8BHP7	>sp|Q8BHP7|OLM2A_MOUSE Olfactomedin-like protein 2A OS=Mus musculus (Mouse) OX=10090 GN=Olfml2a PE=1 SV=1	OLFML2A	1	1	0	1	1	FALSE	5	4	5	4	0.855924
Q9ER64	Q9ER64	>sp|Q9ER64|OSBL5_MOUSE Oxysterol-binding protein-related protein 5 OS=Mus musculus (Mouse) OX=10090 GN=Osbpl5 PE=1 SV=3	OSBPL5	9	9	0.0435218	0.0517018	0.179286	FALSE	45	44	45	44	0.0638597
Q9DCD0	Q9DCD0	>sp|Q9DCD0|6PGD_MOUSE 6-phosphogluconate dehydrogenase, decarboxylating OS=Mus musculus (Mouse) OX=10090 GN=Pgd PE=1 SV=3	PGD	15	15	7.05102e-17	1	1	FALSE	75	74	75	74	0.0212337
E9Q4X2	E9Q4X2	>tr|E9Q4X2|E9Q4X2_MOUSE UDP-glucose glycoprotein glucosyltransferase 2 OS=Mus musculus (Mouse) OX=10090 GN=Uggt2 PE=1 SV=1	UGGT2	7	5	-0.0493925	0.0181456	0.0791156	FALSE	27	28	27	28	-0.215713
F8VPK0	F8VPK0	>tr|F8VPK0|F8VPK0_MOUSE Tetratricopeptide repeat domain 37 OS=Mus musculus (Mouse) OX=10090 GN=Ttc37 PE=1 SV=1	TTC37	13	10	-0.0981251	2.02512e-06	4.37266e-05	FALSE	57	57	57	57	-0.0459352
Q9Z0R6	Q9Z0R6	>sp|Q9Z0R6|ITSN2_MOUSE Intersectin-2 OS=Mus musculus (Mouse) OX=10090 GN=Itsn2 PE=1 SV=2	ITSN2	4	2	-0.0598973	0.153306	0.406151	FALSE	14	17	14	17	-0.940336
Q8BI84	Q8BI84	>sp|Q8BI84|TGO1_MOUSE Transport and Golgi organization protein 1 homolog OS=Mus musculus (Mouse) OX=10090 GN=Mia3 PE=1 SV=2	MIA3	15	15	-0.152047	2.19236e-13	3.2135e-11	FALSE	72	75	72	75	-0.243354
Q9DAW9	Q9DAW9	>sp|Q9DAW9|CNN3_MOUSE Calponin-3 OS=Mus musculus (Mouse) OX=10090 GN=Cnn3 PE=1 SV=1	CNN3	17	16	-0.174337	0.0963936	0.288297	FALSE	79	80	79	80	-0.105471
P70175	P70175	>sp|P70175|DLG3_MOUSE Disks large homolog 3 OS=Mus musculus (Mouse) OX=10090 GN=Dlg3 PE=1 SV=1	DLG3	20	18	0.047591	0.279836	0.633852	FALSE	98	93	98	93	0.211255
P21271;Q99104	P21271;Q99104	>sp|P21271|MYO5B_MOUSE Unconventional myosin-Vb OS=Mus musculus (Mouse) OX=10090 GN=Myo5b PE=1 SV=2;>sp|Q99104|MYO5A_MOUSE Unconventional myosin-Va OS=Mus musculus (Mouse) OX=10090 GN=Myo5a PE=1 SV=2	MYO5B;MYO5A	4	4	-1.54304e-21	1	1	FALSE	20	19	20	19	0.195046
Q9R0K7	Q9R0K7	>sp|Q9R0K7|AT2B2_MOUSE Plasma membrane calcium-transporting ATPase 2 OS=Mus musculus (Mouse) OX=10090 GN=Atp2b2 PE=1 SV=2	ATP2B2	17	14	4.83036e-18	1	1	FALSE	80	76	80	76	0.207066
Q8VDI9	Q8VDI9	>sp|Q8VDI9|ALG9_MOUSE Alpha-1,2-mannosyltransferase ALG9 OS=Mus musculus (Mouse) OX=10090 GN=Alg9 PE=2 SV=1	ALG9	5	5	1.40554e-19	1	1	FALSE	24	24	24	24	-0.0455694
E9Q6Y8	E9Q6Y8	>tr|E9Q6Y8|E9Q6Y8_MOUSE USP domain-containing protein OS=Mus musculus (Mouse) OX=10090 GN=Usp31 PE=1 SV=1	USP31	3	3	0	1	1	FALSE	14	15	14	15	-0.362518
Q9JMH9	Q9JMH9	>sp|Q9JMH9|MY18A_MOUSE Unconventional myosin-XVIIIa OS=Mus musculus (Mouse) OX=10090 GN=Myo18a PE=1 SV=2	MYO18A	60	52	-0.398712	2.93127e-16	9.30921e-14	TRUE	276	291	276	291	-0.304597
Q8K596	Q8K596	>sp|Q8K596|NAC2_MOUSE Sodium/calcium exchanger 2 OS=Mus musculus (Mouse) OX=10090 GN=Slc8a2 PE=1 SV=1	SLC8A2	16	15	9.0743e-18	1	1	FALSE	80	77	80	77	0.142691
Q8BZR9	Q8BZR9	>sp|Q8BZR9|NCBP3_MOUSE Nuclear cap-binding protein subunit 3 OS=Mus musculus (Mouse) OX=10090 GN=Ncbp3 PE=1 SV=1	NCBP3	4	4	0.105509	0.0126769	0.0597178	FALSE	20	18	20	18	0.450365
Q148V7	Q148V7	>sp|Q148V7|RELCH_MOUSE RAB11-binding protein RELCH OS=Mus musculus (Mouse) OX=10090 GN=Relch PE=1 SV=1	RELCH	31	29	-0.0174585	0.319585	0.695052	FALSE	151	151	151	151	-0.0437418
Q61687	Q61687	>sp|Q61687|ATRX_MOUSE Transcriptional regulator ATRX OS=Mus musculus (Mouse) OX=10090 GN=Atrx PE=1 SV=3	ATRX	16	14	1.21754e-18	1	1	FALSE	76	73	76	73	0.151454
Q3UH66	Q3UH66	>sp|Q3UH66|WNK2_MOUSE Serine/threonine-protein kinase WNK2 OS=Mus musculus (Mouse) OX=10090 GN=Wnk2 PE=1 SV=2	WNK2	13	11	1.8551e-17	1	1	FALSE	64	59	64	59	0.351998
Q5F2E8	Q5F2E8	>sp|Q5F2E8|TAOK1_MOUSE Serine/threonine-protein kinase TAO1 OS=Mus musculus (Mouse) OX=10090 GN=Taok1 PE=1 SV=1	TAOK1	18	17	9.46699e-18	1	1	FALSE	83	85	83	85	-0.160547
Q5FWH7	Q5FWH7	>sp|Q5FWH7|S39AC_MOUSE Zinc transporter ZIP12 OS=Mus musculus (Mouse) OX=10090 GN=Slc39a12 PE=1 SV=1	SLC39A12	5	4	0.0486879	0.107369	0.312397	FALSE	25	23	25	23	0.349607
Q9D666	Q9D666	>sp|Q9D666|SUN1_MOUSE SUN domain-containing protein 1 OS=Mus musculus (Mouse) OX=10090 GN=Sun1 PE=1 SV=2	SUN1	8	5	0	1	1	FALSE	37	35	37	35	0.223886
Q58A65	Q58A65	>sp|Q58A65|JIP4_MOUSE C-Jun-amino-terminal kinase-interacting protein 4 OS=Mus musculus (Mouse) OX=10090 GN=Spag9 PE=1 SV=2	SPAG9	17	16	-0.0210415	0.245212	0.573319	FALSE	83	82	83	82	0.0162088
Q9CQN6	Q9CQN6	>sp|Q9CQN6|TM14C_MOUSE Transmembrane protein 14C OS=Mus musculus (Mouse) OX=10090 GN=Tmem14c PE=1 SV=1	TMEM14C	3	3	0.221666	5.38929e-05	0.000685762	FALSE	15	14	15	14	0.276122
Q9JL26	Q9JL26	>sp|Q9JL26|FMNL1_MOUSE Formin-like protein 1 OS=Mus musculus (Mouse) OX=10090 GN=Fmnl1 PE=1 SV=1	FMNL1	5	5	-0.00603852	0.657763	1	FALSE	24	24	24	24	-0.0449267
A6X919	A6X919	>sp|A6X919|D19L1_MOUSE Probable C-mannosyltransferase DPY19L1 OS=Mus musculus (Mouse) OX=10090 GN=Dpy19l1 PE=1 SV=1	DPY19L1	1	1	0.114726	0.0469702	0.166827	FALSE	5	5	5	5	-0.046026
Q9JK23	Q9JK23	>sp|Q9JK23|PSMG1_MOUSE Proteasome assembly chaperone 1 OS=Mus musculus (Mouse) OX=10090 GN=Psmg1 PE=1 SV=1	PSMG1	2	2	0.0409511	0.148871	0.397859	FALSE	10	10	10	10	-0.0450912
Q61753	Q61753	>sp|Q61753|SERA_MOUSE D-3-phosphoglycerate dehydrogenase OS=Mus musculus (Mouse) OX=10090 GN=Phgdh PE=1 SV=3	PHGDH	14	14	-0.158514	0.0308732	0.120972	FALSE	69	68	69	68	0.0267454
P35441	P35441	>sp|P35441|TSP1_MOUSE Thrombospondin-1 OS=Mus musculus (Mouse) OX=10090 GN=Thbs1 PE=1 SV=1	THBS1	12	10	-2.33373e-17	1	1	FALSE	52	54	52	54	-0.227057
Q924Z4	Q924Z4	>sp|Q924Z4|CERS2_MOUSE Ceramide synthase 2 OS=Mus musculus (Mouse) OX=10090 GN=Cers2 PE=1 SV=1	CERS2	2	2	0	1	1	FALSE	10	10	10	10	-0.0450912
Q8CJ40	Q8CJ40	>sp|Q8CJ40|CROCC_MOUSE Rootletin OS=Mus musculus (Mouse) OX=10090 GN=Crocc PE=1 SV=2	CROCC	18	16	-0.158492	0.000219431	0.00222112	FALSE	81	82	81	82	-0.103626
P57780	P57780	>sp|P57780|ACTN4_MOUSE Alpha-actinin-4 OS=Mus musculus (Mouse) OX=10090 GN=Actn4 PE=1 SV=1	ACTN4	35	34	-0.00354381	0.804664	1	FALSE	171	172	171	172	-0.072954
Q7TPR4;Q9JI91	Q7TPR4;Q9JI91	>sp|Q7TPR4|ACTN1_MOUSE Alpha-actinin-1 OS=Mus musculus (Mouse) OX=10090 GN=Actn1 PE=1 SV=1;>sp|Q9JI91|ACTN2_MOUSE Alpha-actinin-2 OS=Mus musculus (Mouse) OX=10090 GN=Actn2 PE=1 SV=2	ACTN1;ACTN2	3	3	-1.52557e-17	1	1	FALSE	15	15	15	15	-0.0447409
Q7TPR4	Q7TPR4	>sp|Q7TPR4|ACTN1_MOUSE Alpha-actinin-1 OS=Mus musculus (Mouse) OX=10090 GN=Actn1 PE=1 SV=1	ACTN1	28	27	-0.137346	0.104442	0.305804	FALSE	139	137	139	137	0.0268192
P43406	P43406	>sp|P43406|ITAV_MOUSE Integrin alpha-V OS=Mus musculus (Mouse) OX=10090 GN=Itgav PE=1 SV=2	ITGAV	20	18	-0.0623337	0.170109	0.437587	FALSE	97	98	97	98	-0.0938856
Q6IR34	Q6IR34	>sp|Q6IR34|GPSM1_MOUSE G-protein-signaling modulator 1 OS=Mus musculus (Mouse) OX=10090 GN=Gpsm1 PE=1 SV=3	GPSM1	16	16	0.0353818	0.138289	0.377656	FALSE	79	79	79	79	-0.0448717
Q810A3	Q810A3	>sp|Q810A3|TTC9C_MOUSE Tetratricopeptide repeat protein 9C OS=Mus musculus (Mouse) OX=10090 GN=Ttc9c PE=1 SV=1	TTC9C	3	3	-4.10486e-18	1	1	FALSE	15	15	15	15	-0.0447409
Q91V61	Q91V61	>sp|Q91V61|SFXN3_MOUSE Sideroflexin-3 OS=Mus musculus (Mouse) OX=10090 GN=Sfxn3 PE=1 SV=1	SFXN3	12	12	0.126301	0.000290863	0.00280628	FALSE	60	59	60	59	0.0369948
Q9QZ08	Q9QZ08	>sp|Q9QZ08|NAGK_MOUSE N-acetyl-D-glucosamine kinase OS=Mus musculus (Mouse) OX=10090 GN=Nagk PE=1 SV=3	NAGK	7	6	-0.0370309	0.109149	0.316085	FALSE	35	33	35	33	0.238795
Q8CCK0;Q9QZQ8	Q8CCK0;Q9QZQ8	>sp|Q8CCK0|H2AW_MOUSE Core histone macro-H2A.2 OS=Mus musculus (Mouse) OX=10090 GN=H2afy2 PE=1 SV=3;>sp|Q9QZQ8|H2AY_MOUSE Core histone macro-H2A.1 OS=Mus musculus (Mouse) OX=10090 GN=H2afy PE=1 SV=3	H2AFY2;H2AFY	2	2	-2.14264e-15	1	1	FALSE	10	10	10	10	-0.0450912
P50171	P50171	>sp|P50171|DHB8_MOUSE Estradiol 17-beta-dehydrogenase 8 OS=Mus musculus (Mouse) OX=10090 GN=Hsd17b8 PE=1 SV=2	HSD17B8	6	6	1.32087e-17	1	1	FALSE	30	30	30	30	-0.0443681
Q8CHC4	Q8CHC4	>sp|Q8CHC4|SYNJ1_MOUSE Synaptojanin-1 OS=Mus musculus (Mouse) OX=10090 GN=Synj1 PE=1 SV=3	SYNJ1	43	41	0	1	1	FALSE	206	208	206	208	-0.0916357
Q9CQE8	Q9CQE8	>sp|Q9CQE8|RTRAF_MOUSE RNA transcription, translation and transport factor protein OS=Mus musculus (Mouse) OX=10090 GN=RTRAF PE=1 SV=1	RTRAF	11	10	-4.76104e-18	1	1	FALSE	52	53	52	53	-0.136453
P12815	P12815	>sp|P12815|PDCD6_MOUSE Programmed cell death protein 6 OS=Mus musculus (Mouse) OX=10090 GN=Pdcd6 PE=1 SV=2	PDCD6	6	6	-0.0684099	0.00103403	0.00784215	FALSE	30	30	30	30	-0.0443681
P12970	P12970	>sp|P12970|RL7A_MOUSE 60S ribosomal protein L7a OS=Mus musculus (Mouse) OX=10090 GN=Rpl7a PE=1 SV=2	RPL7A	10	10	0.044263	0.0401245	0.147886	FALSE	50	50	50	50	-0.0442122
Q61749	Q61749	>sp|Q61749|EI2BD_MOUSE Translation initiation factor eIF-2B subunit delta OS=Mus musculus (Mouse) OX=10090 GN=Eif2b4 PE=1 SV=2	EIF2B4	8	8	-0.0683836	0.000441981	0.00392174	FALSE	40	40	40	40	-0.0442712
P36552	P36552	>sp|P36552|HEM6_MOUSE Oxygen-dependent coproporphyrinogen-III oxidase, mitochondrial OS=Mus musculus (Mouse) OX=10090 GN=Cpox PE=1 SV=2	CPOX	9	8	-0.00152188	0.837738	1	FALSE	44	42	44	42	0.177821
Q8CFI7	Q8CFI7	>sp|Q8CFI7|RPB2_MOUSE DNA-directed RNA polymerase II subunit RPB2 OS=Mus musculus (Mouse) OX=10090 GN=Polr2b PE=1 SV=2	POLR2B	11	10	-3.07359e-18	1	1	FALSE	53	55	53	55	-0.224535
Q6PFD9	Q6PFD9	>sp|Q6PFD9|NUP98_MOUSE Nuclear pore complex protein Nup98-Nup96 OS=Mus musculus (Mouse) OX=10090 GN=Nup98 PE=1 SV=2	NUP98	15	13	0	1	1	FALSE	72	68	72	68	0.23329
Q64511	Q64511	>sp|Q64511|TOP2B_MOUSE DNA topoisomerase 2-beta OS=Mus musculus (Mouse) OX=10090 GN=Top2b PE=1 SV=2	TOP2B	40	36	5.29009e-17	1	1	FALSE	196	189	196	189	0.134424
Q6P5F7	Q6P5F7	>sp|Q6P5F7|TTYH3_MOUSE Protein tweety homolog 3 OS=Mus musculus (Mouse) OX=10090 GN=Ttyh3 PE=1 SV=1	TTYH3	8	8	5.52174e-17	1	1	FALSE	39	37	39	37	0.210772
Q60714	Q60714	>sp|Q60714|S27A1_MOUSE Long-chain fatty acid transport protein 1 OS=Mus musculus (Mouse) OX=10090 GN=Slc27a1 PE=1 SV=1	SLC27A1	11	9	-0.0500618	0.0169462	0.0748778	FALSE	49	52	49	52	-0.33133
Q8R0X7	Q8R0X7	>sp|Q8R0X7|SGPL1_MOUSE Sphingosine-1-phosphate lyase 1 OS=Mus musculus (Mouse) OX=10090 GN=Sgpl1 PE=1 SV=1	SGPL1	10	9	-0.0495251	0.26133	0.601769	FALSE	47	45	47	45	0.166277
Q80TE0	Q80TE0	>sp|Q80TE0|RPAP1_MOUSE RNA polymerase II-associated protein 1 OS=Mus musculus (Mouse) OX=10090 GN=Rpap1 PE=1 SV=2	RPAP1	6	5	-0.0406531	0.0724565	0.232043	FALSE	27	25	27	25	0.323367
O88532	O88532	>sp|O88532|ZFR_MOUSE Zinc finger RNA-binding protein OS=Mus musculus (Mouse) OX=10090 GN=Zfr PE=1 SV=2	ZFR	12	11	0.0618353	0.00418563	0.0244654	FALSE	59	57	59	57	0.123915
Q9WVR4	Q9WVR4	>sp|Q9WVR4|FXR2_MOUSE Fragile X mental retardation syndrome-related protein 2 OS=Mus musculus (Mouse) OX=10090 GN=Fxr2 PE=1 SV=1	FXR2	7	6	0.049208	0.282348	0.637458	FALSE	33	35	33	35	-0.327793
F6SEU4	F6SEU4	>sp|F6SEU4|SYGP1_MOUSE Ras/Rap GTPase-activating protein SynGAP OS=Mus musculus (Mouse) OX=10090 GN=Syngap1 PE=1 SV=2	SYNGAP1	30	24	0	1	1	FALSE	134	135	134	135	-0.0801531
O08915	O08915	>sp|O08915|AIP_MOUSE AH receptor-interacting protein OS=Mus musculus (Mouse) OX=10090 GN=Aip PE=1 SV=1	AIP	6	6	6.03771e-16	1	1	FALSE	30	30	30	30	-0.0443681
Q923B6	Q923B6	>sp|Q923B6|STEA4_MOUSE Metalloreductase STEAP4 OS=Mus musculus (Mouse) OX=10090 GN=Steap4 PE=1 SV=1	STEAP4	4	4	0.269554	0.155605	0.410815	FALSE	20	20	20	20	-0.0445575
Q6NZK8	Q6NZK8	>sp|Q6NZK8|PTPC1_MOUSE Protein tyrosine phosphatase domain-containing protein 1 OS=Mus musculus (Mouse) OX=10090 GN=Ptpdc1 PE=1 SV=1	PTPDC1	2	2	-9.3375e-20	1	1	FALSE	9	9	9	9	-0.0415247
O88342	O88342	>sp|O88342|WDR1_MOUSE WD repeat-containing protein 1 OS=Mus musculus (Mouse) OX=10090 GN=Wdr1 PE=1 SV=3	WDR1	20	19	-5.94128e-17	1	1	FALSE	96	94	96	94	0.0591615
Q3UGX3	Q3UGX3	>sp|Q3UGX3|NAT8L_MOUSE N-acetylaspartate synthetase OS=Mus musculus (Mouse) OX=10090 GN=Nat8l PE=1 SV=1	NAT8L	2	2	-1.99504e-19	1	1	FALSE	10	10	10	10	-0.0450912
Q9WUQ2	Q9WUQ2	>sp|Q9WUQ2|PREB_MOUSE Prolactin regulatory element-binding protein OS=Mus musculus (Mouse) OX=10090 GN=Preb PE=1 SV=1	PREB	9	9	-0.0565112	0.000967524	0.00743394	FALSE	45	45	45	45	-0.0442385
Q99JX7	Q99JX7	>sp|Q99JX7|NXF1_MOUSE Nuclear RNA export factor 1 OS=Mus musculus (Mouse) OX=10090 GN=Nxf1 PE=1 SV=3	NXF1	10	8	0.0176641	0.426112	0.863324	FALSE	45	48	45	48	-0.356542
P35585	P35585	>sp|P35585|AP1M1_MOUSE AP-1 complex subunit mu-1 OS=Mus musculus (Mouse) OX=10090 GN=Ap1m1 PE=1 SV=3	AP1M1	16	15	-1.68997e-16	1	1	FALSE	78	77	78	77	0.0188791
Q8VBZ0	Q8VBZ0	>sp|Q8VBZ0|DHRSX_MOUSE Dehydrogenase/reductase SDR family member on chromosome X homolog OS=Mus musculus (Mouse) OX=10090 GN=Dhrsx PE=1 SV=2	DHRSX	2	1	-0.0709401	0.148356	0.3969	FALSE	6	7	6	7	-0.707318
Q8BFY9	Q8BFY9	>sp|Q8BFY9|TNPO1_MOUSE Transportin-1 OS=Mus musculus (Mouse) OX=10090 GN=Tnpo1 PE=1 SV=2	TNPO1	10	8	2.25544e-18	1	1	FALSE	45	41	45	41	0.406533
P35486	P35486	>sp|P35486|ODPA_MOUSE Pyruvate dehydrogenase E1 component subunit alpha, somatic form, mitochondrial OS=Mus musculus (Mouse) OX=10090 GN=Pdha1 PE=1 SV=1	PDHA1	12	11	0.193211	0.000133952	0.00149049	FALSE	60	56	60	56	0.290123
P56480	P56480	>sp|P56480|ATPB_MOUSE ATP synthase subunit beta, mitochondrial OS=Mus musculus (Mouse) OX=10090 GN=Atp5f1b PE=1 SV=2	ATP5F1B	40	39	0.145262	0.000332646	0.00313016	FALSE	198	199	198	199	-0.068551
Q6VNS1	Q6VNS1	>sp|Q6VNS1|NTRK3_MOUSE NT-3 growth factor receptor OS=Mus musculus (Mouse) OX=10090 GN=Ntrk3 PE=1 SV=1	NTRK3	7	7	-5.53942e-17	1	1	FALSE	33	35	33	35	-0.325679
E9PWZ3	E9PWZ3	>tr|E9PWZ3|E9PWZ3_MOUSE Ribosomal protein L3-like OS=Mus musculus (Mouse) OX=10090 GN=Rpl3l PE=1 SV=1	RPL3L	1	1	0	1	1	FALSE	5	5	5	5	-0.046026
Q9QZX7	Q9QZX7	>sp|Q9QZX7|SRR_MOUSE Serine racemase OS=Mus musculus (Mouse) OX=10090 GN=Srr PE=1 SV=1	SRR	8	8	-0.094919	0.0576613	0.194381	FALSE	40	40	40	40	-0.0442712
O88559	O88559	>sp|O88559|MEN1_MOUSE Menin OS=Mus musculus (Mouse) OX=10090 GN=Men1 PE=1 SV=2	MEN1	2	2	0.0245721	0.446497	0.892525	FALSE	9	9	9	9	-0.0448132
P46664	P46664	>sp|P46664|PURA2_MOUSE Adenylosuccinate synthetase isozyme 2 OS=Mus musculus (Mouse) OX=10090 GN=Adss2 PE=1 SV=2	ADSS2	14	12	-0.119391	4.16769e-17	1.51267e-14	FALSE	68	68	68	68	-0.044224
Q8R5L3	Q8R5L3	>sp|Q8R5L3|VPS39_MOUSE Vam6/Vps39-like protein OS=Mus musculus (Mouse) OX=10090 GN=Vps39 PE=1 SV=1	VPS39	17	15	0.0444623	0.00513361	0.0288557	FALSE	77	77	77	77	-0.043729
Q69ZH9	Q69ZH9	>sp|Q69ZH9|RHG23_MOUSE Rho GTPase-activating protein 23 OS=Mus musculus (Mouse) OX=10090 GN=Arhgap23 PE=1 SV=2	ARHGAP23	13	10	-1.55873e-18	1	1	FALSE	58	51	58	51	0.578288
Q7TQG1	Q7TQG1	>sp|Q7TQG1|PKHA6_MOUSE Pleckstrin homology domain-containing family A member 6 OS=Mus musculus (Mouse) OX=10090 GN=Plekha6 PE=1 SV=1	PLEKHA6	3	2	0.267059	3.33175e-07	8.6671e-06	FALSE	15	13	15	13	0.611474
Q9CZN7	Q9CZN7	>sp|Q9CZN7|GLYM_MOUSE Serine hydroxymethyltransferase, mitochondrial OS=Mus musculus (Mouse) OX=10090 GN=Shmt2 PE=1 SV=1	SHMT2	15	14	-0.139385	0.000129449	0.00145097	FALSE	70	74	70	74	-0.315525
H3BJD6	H3BJD6	>tr|H3BJD6|H3BJD6_MOUSE Protein phosphatase 1, regulatory subunit 9A OS=Mus musculus (Mouse) OX=10090 GN=Ppp1r9a PE=1 SV=1	PPP1R9A	9	8	2.86776e-15	1	1	FALSE	40	41	40	41	-0.16337
P27659	P27659	>sp|P27659|RL3_MOUSE 60S ribosomal protein L3 OS=Mus musculus (Mouse) OX=10090 GN=Rpl3 PE=1 SV=3	RPL3	8	7	0.0199648	0.380749	0.793999	FALSE	37	35	37	35	0.224093
Q3U7U3	Q3U7U3	>sp|Q3U7U3|FBX7_MOUSE F-box only protein 7 OS=Mus musculus (Mouse) OX=10090 GN=Fbxo7 PE=1 SV=2	FBXO7	4	4	3.84065e-17	1	1	FALSE	20	20	20	20	-0.0445575
Q6PHQ9	Q6PHQ9	>tr|Q6PHQ9|Q6PHQ9_MOUSE Polyadenylate-binding protein OS=Mus musculus (Mouse) OX=10090 GN=Pabpc4 PE=1 SV=1	PABPC4	16	14	-0.0261634	0.114648	0.327651	FALSE	74	72	74	72	0.0900677
P97384	P97384	>sp|P97384|ANX11_MOUSE Annexin A11 OS=Mus musculus (Mouse) OX=10090 GN=Anxa11 PE=1 SV=2	ANXA11	11	9	-0.136371	0.129357	0.359053	FALSE	46	49	46	49	-0.349962
Q7TMR0	Q7TMR0	>sp|Q7TMR0|PCP_MOUSE Lysosomal Pro-X carboxypeptidase OS=Mus musculus (Mouse) OX=10090 GN=Prcp PE=1 SV=2	PRCP	4	4	-4.90864e-15	1	1	FALSE	18	19	18	19	-0.298998
P11352	P11352	>sp|P11352|GPX1_MOUSE Glutathione peroxidase 1 OS=Mus musculus (Mouse) OX=10090 GN=Gpx1 PE=1 SV=2	GPX1	7	7	-5.59662e-16	1	1	FALSE	35	34	35	34	0.0956993
Q8JZV7	Q8JZV7	>sp|Q8JZV7|NAGA_MOUSE N-acetylglucosamine-6-phosphate deacetylase OS=Mus musculus (Mouse) OX=10090 GN=Amdhd2 PE=1 SV=1	AMDHD2	6	5	-3.85159e-17	1	1	FALSE	27	29	27	29	-0.384486
Q3TDN2	Q3TDN2	>sp|Q3TDN2|FAF2_MOUSE FAS-associated factor 2 OS=Mus musculus (Mouse) OX=10090 GN=Faf2 PE=1 SV=2	FAF2	13	12	-0.0162342	0.286238	0.643238	FALSE	62	65	62	65	-0.273656
Q8CAQ8	Q8CAQ8	>sp|Q8CAQ8|MIC60_MOUSE MICOS complex subunit Mic60 OS=Mus musculus (Mouse) OX=10090 GN=Immt PE=1 SV=1	IMMT	41	41	0.109684	6.13136e-05	0.000767376	FALSE	203	203	203	203	-0.0438978
Q9CPU4	Q9CPU4	>sp|Q9CPU4|MGST3_MOUSE Microsomal glutathione S-transferase 3 OS=Mus musculus (Mouse) OX=10090 GN=Mgst3 PE=1 SV=1	MGST3	3	3	0	1	1	FALSE	14	14	14	14	-0.0445519
O09044	O09044	>sp|O09044|SNP23_MOUSE Synaptosomal-associated protein 23 OS=Mus musculus (Mouse) OX=10090 GN=Snap23 PE=1 SV=1	SNAP23	3	2	1.5083e-18	1	1	FALSE	13	13	13	13	-0.0404069
P62137;P62141;P63087	P62137;P62141;P63087	>sp|P62137|PP1A_MOUSE Serine/threonine-protein phosphatase PP1-alpha catalytic subunit OS=Mus musculus (Mouse) OX=10090 GN=Ppp1ca PE=1 SV=1;>sp|P62141|PP1B_MOUSE Serine/threonine-protein phosphatase PP1-beta catalytic subunit OS=Mus musculus (Mouse) OX=10090 GN=Ppp1cb PE=1 SV=3;>sp|P63087|PP1G_MOUSE Serine/threonine-protein phosphatase PP1-gamma catalytic subunit OS=Mus musculus (Mouse) OX=10090 …	PPP1CA;PPP1CB;PPP1CC	5	5	-0.00835745	0.650216	1	FALSE	25	25	25	25	-0.0444446
P12960	P12960	>sp|P12960|CNTN1_MOUSE Contactin-1 OS=Mus musculus (Mouse) OX=10090 GN=Cntn1 PE=1 SV=1	CNTN1	44	39	0.0332481	0.288148	0.645961	FALSE	208	204	208	204	0.0520829
Q9CZW4	Q9CZW4	>sp|Q9CZW4|ACSL3_MOUSE Long-chain-fatty-acid--CoA ligase 3 OS=Mus musculus (Mouse) OX=10090 GN=Acsl3 PE=1 SV=2	ACSL3	15	14	-0.0826396	0.000139952	0.00153484	FALSE	72	72	72	72	-0.0438245
P09411	P09411	>sp|P09411|PGK1_MOUSE Phosphoglycerate kinase 1 OS=Mus musculus (Mouse) OX=10090 GN=Pgk1 PE=1 SV=4	PGK1	24	24	-0.0255781	0.227727	0.542587	FALSE	120	120	120	120	-0.0440725
Q91W50	Q91W50	>sp|Q91W50|CSDE1_MOUSE Cold shock domain-containing protein E1 OS=Mus musculus (Mouse) OX=10090 GN=Csde1 PE=1 SV=1	CSDE1	19	18	0.10663	0.000175554	0.00185843	FALSE	91	90	91	90	0.0104824
P61202	P61202	>sp|P61202|CSN2_MOUSE COP9 signalosome complex subunit 2 OS=Mus musculus (Mouse) OX=10090 GN=Cops2 PE=1 SV=1	COPS2	20	17	-0.0019787	0.719367	1	FALSE	93	96	93	96	-0.198331
B2RXS4	B2RXS4	>sp|B2RXS4|PLXB2_MOUSE Plexin-B2 OS=Mus musculus (Mouse) OX=10090 GN=Plxnb2 PE=1 SV=1	PLXNB2	36	31	-0.116663	0.0406145	0.149475	FALSE	170	168	170	168	0.0141408
A2A8L5	A2A8L5	>sp|A2A8L5|PTPRF_MOUSE Receptor-type tyrosine-protein phosphatase F OS=Mus musculus (Mouse) OX=10090 GN=Ptprf PE=1 SV=1	PTPRF	23	19	0.0191653	0.310978	0.679604	FALSE	104	103	104	103	0.002671
Q6NZC7	Q6NZC7	>sp|Q6NZC7|S23IP_MOUSE SEC23-interacting protein OS=Mus musculus (Mouse) OX=10090 GN=Sec23ip PE=1 SV=2	SEC23IP	15	14	-0.148534	7.12193e-05	0.000875538	FALSE	72	73	72	73	-0.111727
P03911	P03911	>sp|P03911|NU4M_MOUSE NADH-ubiquinone oxidoreductase chain 4 OS=Mus musculus (Mouse) OX=10090 GN=Mtnd4 PE=1 SV=1	MTND4	11	9	0.231246	0.000964942	0.00742158	FALSE	50	47	50	47	0.255535
Q01853	Q01853	>sp|Q01853|TERA_MOUSE Transitional endoplasmic reticulum ATPase OS=Mus musculus (Mouse) OX=10090 GN=Vcp PE=1 SV=4	VCP	49	48	-0.0312384	0.112826	0.323731	FALSE	242	244	242	244	-0.0845372
P26231	P26231	>sp|P26231|CTNA1_MOUSE Catenin alpha-1 OS=Mus musculus (Mouse) OX=10090 GN=Ctnna1 PE=1 SV=1	CTNNA1	27	24	-0.110607	0.101983	0.300469	FALSE	126	126	126	126	-0.0431796
Q61301	Q61301	>sp|Q61301|CTNA2_MOUSE Catenin alpha-2 OS=Mus musculus (Mouse) OX=10090 GN=Ctnna2 PE=1 SV=3	CTNNA2	33	29	0	1	1	FALSE	159	153	159	153	0.145315
Q8BPM0	Q8BPM0	>sp|Q8BPM0|DAAM1_MOUSE Disheveled-associated activator of morphogenesis 1 OS=Mus musculus (Mouse) OX=10090 GN=Daam1 PE=1 SV=4	DAAM1	19	17	0.0067655	0.617107	1	FALSE	86	89	86	89	-0.210569
Q80U19	Q80U19	>sp|Q80U19|DAAM2_MOUSE Disheveled-associated activator of morphogenesis 2 OS=Mus musculus (Mouse) OX=10090 GN=Daam2 PE=1 SV=4	DAAM2	2	2	-0.118082	0.00571415	0.0314691	FALSE	10	10	10	10	-0.0450912
Q99LG2	Q99LG2	>sp|Q99LG2|TNPO2_MOUSE Transportin-2 OS=Mus musculus (Mouse) OX=10090 GN=Tnpo2 PE=1 SV=1	TNPO2	13	11	1.61026e-18	1	1	FALSE	57	56	57	56	0.039475
Q99JY4	Q99JY4	>sp|Q99JY4|TRABD_MOUSE TraB domain-containing protein OS=Mus musculus (Mouse) OX=10090 GN=Trabd PE=1 SV=1	TRABD	3	3	0.0569535	0.0680584	0.2214	FALSE	15	15	15	15	-0.0447409
P42932	P42932	>sp|P42932|TCPQ_MOUSE T-complex protein 1 subunit theta OS=Mus musculus (Mouse) OX=10090 GN=Cct8 PE=1 SV=3	CCT8	32	30	2.52452e-17	1	1	FALSE	155	155	155	155	-0.0437445
P28663;Q9DB05	P28663;Q9DB05	>sp|P28663|SNAB_MOUSE Beta-soluble NSF attachment protein OS=Mus musculus (Mouse) OX=10090 GN=Napb PE=1 SV=2;>sp|Q9DB05|SNAA_MOUSE Alpha-soluble NSF attachment protein OS=Mus musculus (Mouse) OX=10090 GN=Napa PE=1 SV=1	NAPB;NAPA	3	3	-8.22475e-20	1	1	FALSE	15	15	15	15	-0.0447409
Q6A0A2	Q6A0A2	>sp|Q6A0A2|LAR4B_MOUSE La-related protein 4B OS=Mus musculus (Mouse) OX=10090 GN=Larp4b PE=1 SV=2	LARP4B	13	12	0.0308028	0.108896	0.31547	FALSE	61	57	61	57	0.286528
P35831	P35831	>sp|P35831|PTN12_MOUSE Tyrosine-protein phosphatase non-receptor type 12 OS=Mus musculus (Mouse) OX=10090 GN=Ptpn12 PE=1 SV=3	PTPN12	8	7	4.43404e-17	1	1	FALSE	36	37	36	37	-0.176015
Q9Z0X1	Q9Z0X1	>sp|Q9Z0X1|AIFM1_MOUSE Apoptosis-inducing factor 1, mitochondrial OS=Mus musculus (Mouse) OX=10090 GN=Aifm1 PE=1 SV=1	AIFM1	17	15	0.033776	0.0925239	0.279959	FALSE	83	80	83	80	0.135279
O88343	O88343	>sp|O88343|S4A4_MOUSE Electrogenic sodium bicarbonate cotransporter 1 OS=Mus musculus (Mouse) OX=10090 GN=Slc4a4 PE=1 SV=2	SLC4A4	16	14	-1.14141e-16	1	1	FALSE	75	76	75	76	-0.10776
Q64446	Q64446	>sp|Q64446|ATP7B_MOUSE Copper-transporting ATPase 2 OS=Mus musculus (Mouse) OX=10090 GN=Atp7b PE=1 SV=2	ATP7B	4	3	-0.0454419	0.139056	0.379059	FALSE	16	19	16	19	-0.849034
O35551	O35551	>sp|O35551|RABE1_MOUSE Rab GTPase-binding effector protein 1 OS=Mus musculus (Mouse) OX=10090 GN=Rabep1 PE=1 SV=2	RABEP1	19	17	-0.0407966	0.155293	0.410275	FALSE	87	90	87	90	-0.209101
P47857	P47857	>sp|P47857|PFKAM_MOUSE ATP-dependent 6-phosphofructokinase, muscle type OS=Mus musculus (Mouse) OX=10090 GN=Pfkm PE=1 SV=3	PFKM	24	24	0	1	1	FALSE	119	119	119	119	-0.0441698
Q9D7N3	Q9D7N3	>sp|Q9D7N3|RT09_MOUSE 28S ribosomal protein S9, mitochondrial OS=Mus musculus (Mouse) OX=10090 GN=Mrps9 PE=1 SV=3	MRPS9	7	6	0.122464	9.09606e-07	2.11372e-05	FALSE	33	32	33	32	0.102284
Q8BFQ8	Q8BFQ8	>sp|Q8BFQ8|GALD1_MOUSE Glutamine amidotransferase-like class 1 domain-containing protein 1 OS=Mus musculus (Mouse) OX=10090 GN=Gatd1 PE=1 SV=1	GATD1	3	3	0.0284212	0.23944	0.563448	FALSE	15	15	15	15	-0.0447409
O35136	O35136	>sp|O35136|NCAM2_MOUSE Neural cell adhesion molecule 2 OS=Mus musculus (Mouse) OX=10090 GN=Ncam2 PE=1 SV=1	NCAM2	14	10	-0.886905	8.33837e-31	2.1185e-27	TRUE	56	66	56	66	-0.841315
Q9DB05	Q9DB05	>sp|Q9DB05|SNAA_MOUSE Alpha-soluble NSF attachment protein OS=Mus musculus (Mouse) OX=10090 GN=Napa PE=1 SV=1	NAPA	15	15	-0.043319	0.0294582	0.11676	FALSE	75	75	75	75	-0.0441328
Q99L47	Q99L47	>sp|Q99L47|F10A1_MOUSE Hsc70-interacting protein OS=Mus musculus (Mouse) OX=10090 GN=St13 PE=1 SV=1	ST13	10	9	-3.34612e-16	1	1	FALSE	47	48	47	48	-0.146689
Q8K0T0	Q8K0T0	>sp|Q8K0T0|RTN1_MOUSE Reticulon-1 OS=Mus musculus (Mouse) OX=10090 GN=Rtn1 PE=1 SV=1	RTN1	18	15	0.0093119	0.591598	1	FALSE	80	81	80	81	-0.105192
Q91WM1	Q91WM1	>sp|Q91WM1|STRBP_MOUSE Spermatid perinuclear RNA-binding protein OS=Mus musculus (Mouse) OX=10090 GN=Strbp PE=1 SV=1	STRBP	9	9	0.191767	1.3845e-12	1.64885e-10	FALSE	44	44	44	44	-0.0431993
Q8CFD4	Q8CFD4	>sp|Q8CFD4|SNX8_MOUSE Sorting nexin-8 OS=Mus musculus (Mouse) OX=10090 GN=Snx8 PE=1 SV=1	SNX8	2	1	-0.0718534	0.154464	0.408509	FALSE	6	9	6	9	-1.80643
Q8C5W0	Q8C5W0	>sp|Q8C5W0|CLMN_MOUSE Calmin OS=Mus musculus (Mouse) OX=10090 GN=Clmn PE=1 SV=2	CLMN	11	9	-0.0539485	0.00305675	0.0189882	FALSE	54	48	54	48	0.528096
P59913	P59913	>sp|P59913|PCMD1_MOUSE Protein-L-isoaspartate O-methyltransferase domain-containing protein 1 OS=Mus musculus (Mouse) OX=10090 GN=Pcmtd1 PE=1 SV=1	PCMTD1	2	2	-0.139385	0.00151898	0.0108001	FALSE	10	10	10	10	-0.0450912
Q9JJ59	Q9JJ59	>sp|Q9JJ59|ABCB9_MOUSE ATP-binding cassette sub-family B member 9 OS=Mus musculus (Mouse) OX=10090 GN=Abcb9 PE=2 SV=1	ABCB9	4	4	0.137041	0.0026956	0.017222	FALSE	20	19	20	19	0.195426
Q99JT1	Q99JT1	>sp|Q99JT1|GATB_MOUSE Glutamyl-tRNA(Gln) amidotransferase subunit B, mitochondrial OS=Mus musculus (Mouse) OX=10090 GN=Gatb PE=1 SV=1	GATB	4	3	0.00571681	0.689568	1	FALSE	19	17	19	17	0.47717
Q8C2Q3	Q8C2Q3	>sp|Q8C2Q3|RBM14_MOUSE RNA-binding protein 14 OS=Mus musculus (Mouse) OX=10090 GN=Rbm14 PE=1 SV=1	RBM14	12	12	6.46814e-18	1	1	FALSE	60	58	60	58	0.121048
O88455	O88455	>sp|O88455|DHCR7_MOUSE 7-dehydrocholesterol reductase OS=Mus musculus (Mouse) OX=10090 GN=Dhcr7 PE=1 SV=1	DHCR7	4	4	-1.16868e-17	1	1	FALSE	20	20	20	20	-0.0445575
Q3TKT4	Q3TKT4	>sp|Q3TKT4|SMCA4_MOUSE Transcription activator BRG1 OS=Mus musculus (Mouse) OX=10090 GN=Smarca4 PE=1 SV=1	SMARCA4	14	11	0.0291038	0.219187	0.526519	FALSE	60	59	60	59	0.0388444
O88958	O88958	>sp|O88958|GNPI1_MOUSE Glucosamine-6-phosphate isomerase 1 OS=Mus musculus (Mouse) OX=10090 GN=Gnpda1 PE=1 SV=3	GNPDA1	8	8	-0.0413936	0.287551	0.644831	FALSE	39	40	39	40	-0.167219
P63042	P63042	>sp|P63042|STMN4_MOUSE Stathmin-4 OS=Mus musculus (Mouse) OX=10090 GN=Stmn4 PE=2 SV=1	STMN4	3	3	0.216424	2.38371e-06	4.99138e-05	FALSE	15	14	15	14	0.274317
P54227	P54227	>sp|P54227|STMN1_MOUSE Stathmin OS=Mus musculus (Mouse) OX=10090 GN=Stmn1 PE=1 SV=2	STMN1	5	5	0.170241	0.051239	0.178168	FALSE	24	24	24	24	-0.0432365
Q9D0C4	Q9D0C4	>sp|Q9D0C4|TRM5_MOUSE tRNA (guanine(37)-N1)-methyltransferase OS=Mus musculus (Mouse) OX=10090 GN=Trmt5 PE=1 SV=1	TRMT5	2	1	0.0378664	0.410687	0.840563	FALSE	9	7	9	7	1.05408
Q9R0A1	Q9R0A1	>sp|Q9R0A1|CLCN2_MOUSE Chloride channel protein 2 OS=Mus musculus (Mouse) OX=10090 GN=Clcn2 PE=1 SV=2	CLCN2	1	1	0	1	1	FALSE	4	5	4	5	-0.94439
P28663	P28663	>sp|P28663|SNAB_MOUSE Beta-soluble NSF attachment protein OS=Mus musculus (Mouse) OX=10090 GN=Napb PE=1 SV=2	NAPB	20	18	-1.05435e-16	1	1	FALSE	99	95	99	95	0.158297
O70310	O70310	>sp|O70310|NMT1_MOUSE Glycylpeptide N-tetradecanoyltransferase 1 OS=Mus musculus (Mouse) OX=10090 GN=Nmt1 PE=1 SV=1	NMT1	8	8	-1.20062e-17	1	1	FALSE	40	40	40	40	-0.0442712
Q9EQJ9	Q9EQJ9	>sp|Q9EQJ9|MAGI3_MOUSE Membrane-associated guanylate kinase, WW and PDZ domain-containing protein 3 OS=Mus musculus (Mouse) OX=10090 GN=Magi3 PE=1 SV=2	MAGI3	6	5	-0.0154907	0.523337	1	FALSE	28	28	28	28	-0.0432645
F8VQC1	F8VQC1	>tr|F8VQC1|F8VQC1_MOUSE Signal recognition particle subunit SRP72 OS=Mus musculus (Mouse) OX=10090 GN=Srp72 PE=1 SV=1	SRP72	17	13	-0.0902188	0.0010901	0.00824277	FALSE	79	77	79	77	0.080381
Q3UCV8	Q3UCV8	>sp|Q3UCV8|OTUL_MOUSE Ubiquitin thioesterase otulin OS=Mus musculus (Mouse) OX=10090 GN=Otulin PE=1 SV=1	OTULIN	4	3	0	1	1	FALSE	18	18	18	18	-0.0454844
Q3UM45	Q3UM45	>sp|Q3UM45|PP1R7_MOUSE Protein phosphatase 1 regulatory subunit 7 OS=Mus musculus (Mouse) OX=10090 GN=Ppp1r7 PE=1 SV=2	PPP1R7	18	18	-1.50937e-18	1	1	FALSE	89	88	89	88	0.0112852
Q8CI32	Q8CI32	>sp|Q8CI32|BAG5_MOUSE BAG family molecular chaperone regulator 5 OS=Mus musculus (Mouse) OX=10090 GN=Bag5 PE=1 SV=1	BAG5	10	10	9.82768e-13	0.999996	1	FALSE	50	48	50	48	0.153578
Q9DB50	Q9DB50	>sp|Q9DB50|AP1S2_MOUSE AP-1 complex subunit sigma-2 OS=Mus musculus (Mouse) OX=10090 GN=Ap1s2 PE=1 SV=1	AP1S2	3	2	-0.354705	1.36232e-08	5.43646e-07	TRUE	12	13	12	13	-0.416267
P61967	P61967	>sp|P61967|AP1S1_MOUSE AP-1 complex subunit sigma-1A OS=Mus musculus (Mouse) OX=10090 GN=Ap1s1 PE=1 SV=1	AP1S1	9	7	0.151411	6.69446e-09	2.88278e-07	FALSE	42	40	42	40	0.194041
P61264	P61264	>sp|P61264|STX1B_MOUSE Syntaxin-1B OS=Mus musculus (Mouse) OX=10090 GN=Stx1b PE=1 SV=1	STX1B	19	18	0.0512094	0.296072	0.657343	FALSE	94	92	94	92	0.060684
Q920Q4	Q920Q4	>sp|Q920Q4|VPS16_MOUSE Vacuolar protein sorting-associated protein 16 homolog OS=Mus musculus (Mouse) OX=10090 GN=Vps16 PE=1 SV=3	VPS16	19	18	6.07342e-19	1	1	FALSE	91	90	91	90	0.00969087
Q8BSY0	Q8BSY0	>sp|Q8BSY0|ASPH_MOUSE Aspartyl/asparaginyl beta-hydroxylase OS=Mus musculus (Mouse) OX=10090 GN=Asph PE=1 SV=1	ASPH	12	11	-0.0783478	0.221423	0.531053	FALSE	54	56	54	56	-0.221
P06801	P06801	>sp|P06801|MAOX_MOUSE NADP-dependent malic enzyme OS=Mus musculus (Mouse) OX=10090 GN=Me1 PE=1 SV=2	ME1	26	24	-0.0454421	0.119475	0.338706	FALSE	125	125	125	125	-0.0442832
Q3TMP1	Q3TMP1	>tr|Q3TMP1|Q3TMP1_MOUSE General transcription factor IIIC, polypeptide 3 OS=Mus musculus (Mouse) OX=10090 GN=Gtf3c3 PE=1 SV=1	GTF3C3	6	6	0.0362713	0.282501	0.637469	FALSE	29	29	29	29	-0.0433589
Q9WUM4	Q9WUM4	>sp|Q9WUM4|COR1C_MOUSE Coronin-1C OS=Mus musculus (Mouse) OX=10090 GN=Coro1c PE=1 SV=2	CORO1C	7	6	0.100207	0.000553748	0.00470531	FALSE	34	32	34	32	0.247458
P60521	P60521	>sp|P60521|GBRL2_MOUSE Gamma-aminobutyric acid receptor-associated protein-like 2 OS=Mus musculus (Mouse) OX=10090 GN=Gabarapl2 PE=1 SV=1	GABARAPL2	5	4	0.0817102	0.0909377	0.275927	FALSE	20	20	20	20	-0.0458462
Q99PU8	Q99PU8	>sp|Q99PU8|DHX30_MOUSE ATP-dependent RNA helicase DHX30 OS=Mus musculus (Mouse) OX=10090 GN=Dhx30 PE=1 SV=1	DHX30	25	22	0.0442773	0.0116694	0.0557948	FALSE	117	118	117	118	-0.0864327
Q920A1	Q920A1	>sp|Q920A1|CLTR2_MOUSE Cysteinyl leukotriene receptor 2 OS=Mus musculus (Mouse) OX=10090 GN=Cysltr2 PE=2 SV=2	CYSLTR2	1	1	-1.25019e-17	1	1	FALSE	5	5	5	5	-0.046026
Q8BTG3	Q8BTG3	>sp|Q8BTG3|T11L1_MOUSE T-complex protein 11-like protein 1 OS=Mus musculus (Mouse) OX=10090 GN=Tcp11l1 PE=1 SV=1	TCP11L1	9	8	-0.0105804	0.499733	0.973413	FALSE	43	44	43	44	-0.156216
Q9ES56	Q9ES56	>sp|Q9ES56|TPPC4_MOUSE Trafficking protein particle complex subunit 4 OS=Mus musculus (Mouse) OX=10090 GN=Trappc4 PE=1 SV=1	TRAPPC4	7	7	2.71886e-18	1	1	FALSE	35	35	35	35	-0.0443129
P18242	P18242	>sp|P18242|CATD_MOUSE Cathepsin D OS=Mus musculus (Mouse) OX=10090 GN=Ctsd PE=1 SV=1	CTSD	11	11	-0.10867	0.00154717	0.0109393	FALSE	55	54	55	54	0.0453555
Q61074	Q61074	>sp|Q61074|PPM1G_MOUSE Protein phosphatase 1G OS=Mus musculus (Mouse) OX=10090 GN=Ppm1g PE=1 SV=3	PPM1G	11	10	0.162645	1.57818e-07	4.59118e-06	FALSE	53	53	53	53	-0.0430998
Q80TG9	Q80TG9	>sp|Q80TG9|LRFN2_MOUSE Leucine-rich repeat and fibronectin type-III domain-containing protein 2 OS=Mus musculus (Mouse) OX=10090 GN=Lrfn2 PE=1 SV=2	LRFN2	8	7	0.317202	4.09031e-06	7.87282e-05	TRUE	37	33	37	33	0.503978
Q8CGA0	Q8CGA0	>sp|Q8CGA0|PPM1F_MOUSE Protein phosphatase 1F OS=Mus musculus (Mouse) OX=10090 GN=Ppm1f PE=1 SV=1	PPM1F	11	11	4.00545e-18	1	1	FALSE	53	54	53	54	-0.133658
Q9JM52	Q9JM52	>sp|Q9JM52|MINK1_MOUSE Misshapen-like kinase 1 OS=Mus musculus (Mouse) OX=10090 GN=Mink1 PE=1 SV=3	MINK1	11	8	-4.31656e-15	1	1	FALSE	52	44	52	44	0.765576
Q8C163	Q8C163	>sp|Q8C163|EXOG_MOUSE Nuclease EXOG, mitochondrial OS=Mus musculus (Mouse) OX=10090 GN=Exog PE=1 SV=1	EXOG	11	9	0.045032	0.0597526	0.199927	FALSE	52	48	52	48	0.345483
Q8BJU0	Q8BJU0	>sp|Q8BJU0|SGTA_MOUSE Small glutamine-rich tetratricopeptide repeat-containing protein alpha OS=Mus musculus (Mouse) OX=10090 GN=Sgta PE=1 SV=2	SGTA	11	8	4.18873e-19	1	1	FALSE	48	52	48	52	-0.4318
Q8R349	Q8R349	>sp|Q8R349|CDC16_MOUSE Cell division cycle protein 16 homolog OS=Mus musculus (Mouse) OX=10090 GN=Cdc16 PE=1 SV=1	CDC16	12	11	0.0288689	0.124736	0.349109	FALSE	58	57	58	57	0.0410097
Q9CZU3	Q9CZU3	>sp|Q9CZU3|MTREX_MOUSE Exosome RNA helicase MTR4 OS=Mus musculus (Mouse) OX=10090 GN=Mtrex PE=1 SV=1	MTREX	12	9	1.56206e-17	1	1	FALSE	57	48	57	48	0.787349
P47759	P47759	>sp|P47759|NSG2_MOUSE Neuronal vesicle trafficking-associated protein 2 OS=Mus musculus (Mouse) OX=10090 GN=Nsg2 PE=1 SV=1	NSG2	2	2	0	1	1	FALSE	9	9	9	9	-0.0381069
Q6P5E8	Q6P5E8	>sp|Q6P5E8|DGKQ_MOUSE Diacylglycerol kinase theta OS=Mus musculus (Mouse) OX=10090 GN=Dgkq PE=1 SV=1	DGKQ	7	7	8.78992e-20	1	1	FALSE	34	33	34	33	0.0993978
Q9Z2U1	Q9Z2U1	>sp|Q9Z2U1|PSA5_MOUSE Proteasome subunit alpha type-5 OS=Mus musculus (Mouse) OX=10090 GN=Psma5 PE=1 SV=1	PSMA5	12	12	-0.0244235	0.108187	0.314134	FALSE	60	60	60	60	-0.0441726
E9Q774	E9Q774	>tr|E9Q774|E9Q774_MOUSE A kinase (PRKA) anchor protein 11 OS=Mus musculus (Mouse) OX=10090 GN=Akap11 PE=1 SV=2	AKAP11	2	1	-6.27243e-19	1	1	FALSE	8	7	8	7	0.545093
Q9QYI4	Q9QYI4	>sp|Q9QYI4|DJB12_MOUSE DnaJ homolog subfamily B member 12 OS=Mus musculus (Mouse) OX=10090 GN=Dnajb12 PE=1 SV=2	DNAJB12	6	5	0.0738081	0.0222822	0.0928569	FALSE	25	24	25	24	0.149422
Q9Z1J3	Q9Z1J3	>sp|Q9Z1J3|NFS1_MOUSE Cysteine desulfurase, mitochondrial OS=Mus musculus (Mouse) OX=10090 GN=Nfs1 PE=1 SV=3	NFS1	9	8	0.0485643	0.0458599	0.164028	FALSE	43	42	43	42	0.0682885
Q8BKC5	Q8BKC5	>sp|Q8BKC5|IPO5_MOUSE Importin-5 OS=Mus musculus (Mouse) OX=10090 GN=Ipo5 PE=1 SV=3	IPO5	20	19	7.61091e-17	1	1	FALSE	95	100	95	100	-0.294658
Q9CQF6	Q9CQF6	>sp|Q9CQF6|ADPPT_MOUSE L-aminoadipate-semialdehyde dehydrogenase-phosphopantetheinyl transferase OS=Mus musculus (Mouse) OX=10090 GN=Aasdhppt PE=1 SV=1	AASDHPPT	1	1	0	1	1	FALSE	5	5	5	5	-0.046026
P12382;Q9WUA3	P12382;Q9WUA3	>sp|P12382|PFKAL_MOUSE ATP-dependent 6-phosphofructokinase, liver type OS=Mus musculus (Mouse) OX=10090 GN=Pfkl PE=1 SV=4;>sp|Q9WUA3|PFKAP_MOUSE ATP-dependent 6-phosphofructokinase, platelet type OS=Mus musculus (Mouse) OX=10090 GN=Pfkp PE=1 SV=1	PFKL;PFKP	2	2	-0.086131	0.0167491	0.0743241	FALSE	10	10	10	10	-0.0450912
P99026	P99026	>sp|P99026|PSB4_MOUSE Proteasome subunit beta type-4 OS=Mus musculus (Mouse) OX=10090 GN=Psmb4 PE=1 SV=1	PSMB4	11	11	0	1	1	FALSE	55	55	55	55	-0.0441907
Q6P5F9	Q6P5F9	>sp|Q6P5F9|XPO1_MOUSE Exportin-1 OS=Mus musculus (Mouse) OX=10090 GN=Xpo1 PE=1 SV=1	XPO1	36	33	1.05482e-14	1	1	FALSE	170	171	170	171	-0.0729988
B9EKR1	B9EKR1	>sp|B9EKR1|PTPRZ_MOUSE Receptor-type tyrosine-protein phosphatase zeta OS=Mus musculus (Mouse) OX=10090 GN=Ptprz1 PE=1 SV=1	PTPRZ1	15	14	-0.167725	2.35219e-10	1.53234e-08	FALSE	67	71	67	71	-0.326293
Q8BUK6	Q8BUK6	>sp|Q8BUK6|HOOK3_MOUSE Protein Hook homolog 3 OS=Mus musculus (Mouse) OX=10090 GN=Hook3 PE=1 SV=2	HOOK3	16	15	0.0219214	0.216297	0.522707	FALSE	76	79	76	79	-0.233022
Q9QWY8	Q9QWY8	>sp|Q9QWY8|ASAP1_MOUSE Arf-GAP with SH3 domain, ANK repeat and PH domain-containing protein 1 OS=Mus musculus (Mouse) OX=10090 GN=Asap1 PE=1 SV=2	ASAP1	14	14	-9.77098e-18	1	1	FALSE	69	69	69	69	-0.0441922
O89001	O89001	>sp|O89001|CBPD_MOUSE Carboxypeptidase D OS=Mus musculus (Mouse) OX=10090 GN=Cpd PE=1 SV=2	CPD	16	15	0.28583	1.29403e-08	5.19111e-07	FALSE	76	74	76	74	0.0853558
P97333	P97333	>sp|P97333|NRP1_MOUSE Neuropilin-1 OS=Mus musculus (Mouse) OX=10090 GN=Nrp1 PE=1 SV=2	NRP1	19	17	0.249506	6.95661e-06	0.000120508	FALSE	93	86	93	86	0.338553
P62082	P62082	>sp|P62082|RS7_MOUSE 40S ribosomal protein S7 OS=Mus musculus (Mouse) OX=10090 GN=Rps7 PE=2 SV=1	RPS7	7	7	1.99988e-16	1	1	FALSE	34	34	34	34	-0.0434379
P61222	P61222	>sp|P61222|ABCE1_MOUSE ATP-binding cassette sub-family E member 1 OS=Mus musculus (Mouse) OX=10090 GN=Abce1 PE=1 SV=1	ABCE1	15	14	1.1716e-18	1	1	FALSE	71	72	71	72	-0.112818
P13864	P13864	>sp|P13864|DNMT1_MOUSE DNA (cytosine-5)-methyltransferase 1 OS=Mus musculus (Mouse) OX=10090 GN=Dnmt1 PE=1 SV=5	DNMT1	9	8	0.0526589	0.122082	0.344251	FALSE	39	41	39	41	-0.287143
Q9WVJ3	Q9WVJ3	>sp|Q9WVJ3|CBPQ_MOUSE Carboxypeptidase Q OS=Mus musculus (Mouse) OX=10090 GN=Cpq PE=1 SV=1	CPQ	4	4	-1.26829e-17	1	1	FALSE	19	20	19	20	-0.28756
Q8BYM5	Q8BYM5	>sp|Q8BYM5|NLGN3_MOUSE Neuroligin-3 OS=Mus musculus (Mouse) OX=10090 GN=Nlgn3 PE=1 SV=2	NLGN3	10	10	0.136814	3.99253e-05	0.000534816	FALSE	48	47	48	47	0.0580702
P53798	P53798	>sp|P53798|FDFT_MOUSE Squalene synthase OS=Mus musculus (Mouse) OX=10090 GN=Fdft1 PE=1 SV=2	FDFT1	6	5	0.247617	0.000137972	0.00152188	FALSE	29	28	29	28	0.120913
Q8VDG7	Q8VDG7	>sp|Q8VDG7|PAFA2_MOUSE Platelet-activating factor acetylhydrolase 2, cytoplasmic OS=Mus musculus (Mouse) OX=10090 GN=Pafah2 PE=1 SV=2	PAFAH2	3	3	-0.109137	0.00888613	0.0448247	FALSE	13	14	13	14	-0.383652
P58802	P58802	>sp|P58802|TB10A_MOUSE TBC1 domain family member 10A OS=Mus musculus (Mouse) OX=10090 GN=Tbc1d10a PE=1 SV=1	TBC1D10A	9	7	0	1	1	FALSE	40	39	40	39	0.0758328
Q9Z1R4	Q9Z1R4	>sp|Q9Z1R4|CF047_MOUSE Uncharacterized protein C6orf47 homolog OS=Mus musculus (Mouse) OX=10090 GN=D17h6s53e PE=1 SV=1	D17H6S53E	1	1	1.54778e-18	1	1	FALSE	5	5	5	5	-0.046026
Q8VDQ1	Q8VDQ1	>sp|Q8VDQ1|PTGR2_MOUSE Prostaglandin reductase 2 OS=Mus musculus (Mouse) OX=10090 GN=Ptgr2 PE=1 SV=2	PTGR2	7	7	7.50614e-17	1	1	FALSE	34	34	34	34	-0.0442197
Q99MR0	Q99MR0	>sp|Q99MR0|ACL6B_MOUSE Actin-like protein 6B OS=Mus musculus (Mouse) OX=10090 GN=Actl6b PE=1 SV=1	ACTL6B	5	5	0.117089	0.000548743	0.00467844	FALSE	25	24	25	24	0.149422
O35239	O35239	>sp|O35239|PTN9_MOUSE Tyrosine-protein phosphatase non-receptor type 9 OS=Mus musculus (Mouse) OX=10090 GN=Ptpn9 PE=1 SV=2	PTPN9	12	10	-0.082522	0.00100904	0.00767368	FALSE	57	58	57	58	-0.128166
P61148	P61148	>sp|P61148|FGF1_MOUSE Fibroblast growth factor 1 OS=Mus musculus (Mouse) OX=10090 GN=Fgf1 PE=1 SV=1	FGF1	4	4	0.0357151	0.488657	0.955991	FALSE	20	19	20	19	0.195426
Q9DCR2	Q9DCR2	>sp|Q9DCR2|AP3S1_MOUSE AP-3 complex subunit sigma-1 OS=Mus musculus (Mouse) OX=10090 GN=Ap3s1 PE=1 SV=2	AP3S1	8	7	-0.00966374	0.556279	1	FALSE	36	39	36	39	-0.428126
P61924	P61924	>sp|P61924|COPZ1_MOUSE Coatomer subunit zeta-1 OS=Mus musculus (Mouse) OX=10090 GN=Copz1 PE=1 SV=1	COPZ1	6	6	2.22834e-16	1	1	FALSE	29	29	29	29	-0.0455759
Q8BR07	Q8BR07	>sp|Q8BR07|BICD1_MOUSE Protein bicaudal D homolog 1 OS=Mus musculus (Mouse) OX=10090 GN=Bicd1 PE=1 SV=2	BICD1	2	2	-0.0635922	0.0668298	0.218148	FALSE	10	10	10	10	-0.0450912
P09470	P09470	>sp|P09470|ACE_MOUSE Angiotensin-converting enzyme OS=Mus musculus (Mouse) OX=10090 GN=Ace PE=1 SV=3	ACE	22	19	-0.116172	0.0317267	0.123315	FALSE	99	100	99	100	-0.0950023
Q9WVG6	Q9WVG6	>sp|Q9WVG6|CARM1_MOUSE Histone-arginine methyltransferase CARM1 OS=Mus musculus (Mouse) OX=10090 GN=Carm1 PE=1 SV=2	CARM1	8	6	0.0653716	0.00649498	0.0349117	FALSE	34	33	34	33	0.0986173
Q60949	Q60949	>sp|Q60949|TBCD1_MOUSE TBC1 domain family member 1 OS=Mus musculus (Mouse) OX=10090 GN=Tbc1d1 PE=1 SV=3	TBC1D1	2	2	-0.0667712	0.0379071	0.141147	FALSE	9	9	9	9	-0.0456007
A2CG49	A2CG49	>sp|A2CG49|KALRN_MOUSE Kalirin OS=Mus musculus (Mouse) OX=10090 GN=Kalrn PE=1 SV=1	KALRN	19	16	-0.20575	1.33359e-13	2.07441e-11	FALSE	85	91	85	91	-0.377404
P42227	P42227	>sp|P42227|STAT3_MOUSE Signal transducer and activator of transcription 3 OS=Mus musculus (Mouse) OX=10090 GN=Stat3 PE=1 SV=2	STAT3	20	18	-6.86925e-18	1	1	FALSE	97	96	97	96	0.00667297
P24472	P24472	>sp|P24472|GSTA4_MOUSE Glutathione S-transferase A4 OS=Mus musculus (Mouse) OX=10090 GN=Gsta4 PE=1 SV=3	GSTA4	11	9	4.47216e-17	1	1	FALSE	49	49	49	49	-0.0447655
Q9CRA8	Q9CRA8	>sp|Q9CRA8|EXOS5_MOUSE Exosome complex component RRP46 OS=Mus musculus (Mouse) OX=10090 GN=Exosc5 PE=1 SV=1	EXOSC5	1	1	0.0562122	0.2517	0.585252	FALSE	5	5	5	5	-0.046026
Q9CZ42	Q9CZ42	>sp|Q9CZ42|NNRD_MOUSE ATP-dependent (S)-NAD(P)H-hydrate dehydratase OS=Mus musculus (Mouse) OX=10090 GN=Naxd PE=1 SV=1	NAXD	13	11	-9.68771e-18	1	1	FALSE	63	62	63	62	0.0343589
Q8R3Q2	Q8R3Q2	>sp|Q8R3Q2|PP6R2_MOUSE Serine/threonine-protein phosphatase 6 regulatory subunit 2 OS=Mus musculus (Mouse) OX=10090 GN=Ppp6r2 PE=1 SV=1	PPP6R2	11	8	-1.25387e-17	1	1	FALSE	49	49	49	49	-0.0429848
P99024;Q7TMM9;Q9CWF2;Q9ERD7	P99024;Q7TMM9;Q9CWF2;Q9ERD7	>sp|P99024|TBB5_MOUSE Tubulin beta-5 chain OS=Mus musculus (Mouse) OX=10090 GN=Tubb5 PE=1 SV=1;>sp|Q7TMM9|TBB2A_MOUSE Tubulin beta-2A chain OS=Mus musculus (Mouse) OX=10090 GN=Tubb2a PE=1 SV=1;>sp|Q9CWF2|TBB2B_MOUSE Tubulin beta-2B chain OS=Mus musculus (Mouse) OX=10090 GN=Tubb2b PE=1 SV=1;>sp|Q9ERD7|TBB3_MOUSE Tubulin beta-3 chain OS=Mus musculus (Mouse) OX=10090 GN=Tubb3 PE=1 SV=1	TUBB5;TUBB2A;TUBB2B;TUBB3	3	3	0.133054	0.0211999	0.0894716	FALSE	15	15	15	15	-0.0447409
P61211	P61211	>sp|P61211|ARL1_MOUSE ADP-ribosylation factor-like protein 1 OS=Mus musculus (Mouse) OX=10090 GN=Arl1 PE=1 SV=1	ARL1	6	6	-0.0175927	0.368858	0.776425	FALSE	30	30	30	30	-0.0443681
Q64521	Q64521	>sp|Q64521|GPDM_MOUSE Glycerol-3-phosphate dehydrogenase, mitochondrial OS=Mus musculus (Mouse) OX=10090 GN=Gpd2 PE=1 SV=2	GPD2	29	26	1.42306e-17	1	1	FALSE	139	138	139	138	-0.00850136
P57780;Q7TPR4	P57780;Q7TPR4	>sp|P57780|ACTN4_MOUSE Alpha-actinin-4 OS=Mus musculus (Mouse) OX=10090 GN=Actn4 PE=1 SV=1;>sp|Q7TPR4|ACTN1_MOUSE Alpha-actinin-1 OS=Mus musculus (Mouse) OX=10090 GN=Actn1 PE=1 SV=1	ACTN4;ACTN1	8	7	-0.169342	0.0584146	0.196572	FALSE	38	39	38	39	-0.168145
P14824	P14824	>sp|P14824|ANXA6_MOUSE Annexin A6 OS=Mus musculus (Mouse) OX=10090 GN=Anxa6 PE=1 SV=3	ANXA6	36	33	0	1	1	FALSE	170	170	170	170	-0.0451217
Q8BML9	Q8BML9	>sp|Q8BML9|SYQ_MOUSE Glutamine--tRNA ligase OS=Mus musculus (Mouse) OX=10090 GN=Qars PE=1 SV=1	QARS	29	24	-7.95444e-19	1	1	FALSE	134	139	134	139	-0.223463
Q8R4C2	Q8R4C2	>sp|Q8R4C2|RUFY2_MOUSE RUN and FYVE domain-containing protein 2 OS=Mus musculus (Mouse) OX=10090 GN=Rufy2 PE=1 SV=2	RUFY2	10	9	0.0847757	4.1824e-05	0.000555669	FALSE	50	48	50	48	0.15287
Q80ZJ6	Q80ZJ6	>sp|Q80ZJ6|ZER1_MOUSE Protein zer-1 homolog OS=Mus musculus (Mouse) OX=10090 GN=Zer1 PE=1 SV=1	ZER1	7	7	0	1	1	FALSE	35	34	35	34	0.0942419
Q5FWK3	Q5FWK3	>sp|Q5FWK3|RHG01_MOUSE Rho GTPase-activating protein 1 OS=Mus musculus (Mouse) OX=10090 GN=Arhgap1 PE=1 SV=1	ARHGAP1	13	13	-6.33706e-18	1	1	FALSE	65	65	65	65	-0.0441573
Q9QUM9	Q9QUM9	>sp|Q9QUM9|PSA6_MOUSE Proteasome subunit alpha type-6 OS=Mus musculus (Mouse) OX=10090 GN=Psma6 PE=1 SV=1	PSMA6	9	9	-3.31582e-16	1	1	FALSE	44	44	44	44	-0.0443328
E9Q9B7	E9Q9B7	>tr|E9Q9B7|E9Q9B7_MOUSE ANK_REP_REGION domain-containing protein OS=Mus musculus (Mouse) OX=10090 GN=Kidins220 PE=1 SV=1	KIDINS220	25	23	2.35676e-16	1	1	FALSE	117	115	117	115	0.0400675
Q3U0V1	Q3U0V1	>sp|Q3U0V1|FUBP2_MOUSE Far upstream element-binding protein 2 OS=Mus musculus (Mouse) OX=10090 GN=Khsrp PE=1 SV=2	KHSRP	16	15	0.0567994	0.0664472	0.217645	FALSE	79	77	79	77	0.0799708
Q80ZM7	Q80ZM7	>sp|Q80ZM7|T2AG_MOUSE Transcription initiation factor IIA subunit 2 OS=Mus musculus (Mouse) OX=10090 GN=Gtf2a2 PE=1 SV=2	GTF2A2	1	1	0.728989	0.00196239	0.0132718	FALSE	5	5	5	5	-0.046026
Q60900	Q60900	>sp|Q60900|ELAV3_MOUSE ELAV-like protein 3 OS=Mus musculus (Mouse) OX=10090 GN=Elavl3 PE=1 SV=1	ELAVL3	9	8	0.11241	0.0105044	0.0512576	FALSE	45	42	45	42	0.28781
Q60899;Q61701	Q60899;Q61701	>sp|Q60899|ELAV2_MOUSE ELAV-like protein 2 OS=Mus musculus (Mouse) OX=10090 GN=Elavl2 PE=1 SV=1;>sp|Q61701|ELAV4_MOUSE ELAV-like protein 4 OS=Mus musculus (Mouse) OX=10090 GN=Elavl4 PE=1 SV=1	ELAVL2;ELAVL4	3	3	0.0711154	0.0498414	0.174426	FALSE	15	15	15	15	-0.0447409
Q8VD75	Q8VD75	>sp|Q8VD75|HIP1_MOUSE Huntingtin-interacting protein 1 OS=Mus musculus (Mouse) OX=10090 GN=Hip1 PE=1 SV=2	HIP1	23	20	3.40987e-18	1	1	FALSE	111	102	111	102	0.369308
Q8VE70	Q8VE70	>sp|Q8VE70|PDC10_MOUSE Programmed cell death protein 10 OS=Mus musculus (Mouse) OX=10090 GN=Pdcd10 PE=1 SV=1	PDCD10	8	8	0	1	1	FALSE	40	40	40	40	-0.0442712
Q80X50	Q80X50	>sp|Q80X50|UBP2L_MOUSE Ubiquitin-associated protein 2-like OS=Mus musculus (Mouse) OX=10090 GN=Ubap2l PE=1 SV=1	UBAP2L	12	12	0.0331727	0.0663652	0.21747	FALSE	60	59	60	59	0.0379716
P27612	P27612	>sp|P27612|PLAP_MOUSE Phospholipase A-2-activating protein OS=Mus musculus (Mouse) OX=10090 GN=Plaa PE=1 SV=4	PLAA	24	22	-0.0446618	0.00395305	0.0234916	FALSE	114	114	114	114	-0.0430547
Q64727	Q64727	>sp|Q64727|VINC_MOUSE Vinculin OS=Mus musculus (Mouse) OX=10090 GN=Vcl PE=1 SV=4	VCL	51	47	-0.0451521	0.419981	0.854537	FALSE	242	245	242	245	-0.104567
Q8R366	Q8R366	>sp|Q8R366|IGSF8_MOUSE Immunoglobulin superfamily member 8 OS=Mus musculus (Mouse) OX=10090 GN=Igsf8 PE=1 SV=2	IGSF8	9	9	0.162598	0.000891431	0.00693315	FALSE	44	45	44	45	-0.152431
Q8CJH3	Q8CJH3	>sp|Q8CJH3|PLXB1_MOUSE Plexin-B1 OS=Mus musculus (Mouse) OX=10090 GN=Plxnb1 PE=1 SV=2	PLXNB1	19	17	-0.182686	3.29132e-13	4.64564e-11	FALSE	85	90	85	90	-0.324394
Q8C0D5	Q8C0D5	>sp|Q8C0D5|EFL1_MOUSE Elongation factor-like GTPase 1 OS=Mus musculus (Mouse) OX=10090 GN=Efl1 PE=1 SV=1	EFL1	13	12	-0.0787526	9.22684e-05	0.00108529	FALSE	61	64	61	64	-0.277953
P39054	P39054	>sp|P39054|DYN2_MOUSE Dynamin-2 OS=Mus musculus (Mouse) OX=10090 GN=Dnm2 PE=1 SV=2	DNM2	15	15	-0.0399439	0.20163	0.496229	FALSE	75	73	75	73	0.087243
P46061	P46061	>sp|P46061|RAGP1_MOUSE Ran GTPase-activating protein 1 OS=Mus musculus (Mouse) OX=10090 GN=Rangap1 PE=1 SV=2	RANGAP1	15	14	0.0736825	0.005957	0.0324932	FALSE	73	72	73	72	0.0235873
P05532	P05532	>sp|P05532|KIT_MOUSE Mast/stem cell growth factor receptor Kit OS=Mus musculus (Mouse) OX=10090 GN=Kit PE=1 SV=3	KIT	11	8	-0.447134	4.29801e-08	1.48907e-06	TRUE	46	50	46	50	-0.448951
Q9QZ06	Q9QZ06	>sp|Q9QZ06|TOLIP_MOUSE Toll-interacting protein OS=Mus musculus (Mouse) OX=10090 GN=Tollip PE=1 SV=1	TOLLIP	8	7	0	1	1	FALSE	38	35	38	35	0.352002
Q3UUI3	Q3UUI3	>sp|Q3UUI3|THEM4_MOUSE Acyl-coenzyme A thioesterase THEM4 OS=Mus musculus (Mouse) OX=10090 GN=Them4 PE=1 SV=1	THEM4	7	7	0.30014	6.93928e-06	0.000120481	TRUE	35	35	35	35	-0.0443129
Q80UP5	Q80UP5	>sp|Q80UP5|AN13A_MOUSE Ankyrin repeat domain-containing protein 13A OS=Mus musculus (Mouse) OX=10090 GN=Ankrd13a PE=1 SV=2	ANKRD13A	5	4	7.2531e-18	1	1	FALSE	23	22	23	22	0.164123
Q9JLN9	Q9JLN9	>sp|Q9JLN9|MTOR_MOUSE Serine/threonine-protein kinase mTOR OS=Mus musculus (Mouse) OX=10090 GN=Mtor PE=1 SV=2	MTOR	36	29	-0.260071	1.50149e-13	2.28887e-11	FALSE	159	170	159	170	-0.374003
Q8VE19	Q8VE19	>sp|Q8VE19|MIO_MOUSE GATOR complex protein MIOS OS=Mus musculus (Mouse) OX=10090 GN=Mios PE=1 SV=2	MIOS	13	11	0.02963	0.0829528	0.257963	FALSE	60	60	60	60	-0.0425746
P14685	P14685	>sp|P14685|PSMD3_MOUSE 26S proteasome non-ATPase regulatory subunit 3 OS=Mus musculus (Mouse) OX=10090 GN=Psmd3 PE=1 SV=3	PSMD3	28	26	-0.0788095	0.00026117	0.00255538	FALSE	132	137	132	137	-0.226266
Q91Z38	Q91Z38	>sp|Q91Z38|TTC1_MOUSE Tetratricopeptide repeat protein 1 OS=Mus musculus (Mouse) OX=10090 GN=Ttc1 PE=1 SV=1	TTC1	5	5	0.0395389	0.185351	0.46611	FALSE	24	25	24	25	-0.237531
O88544	O88544	>sp|O88544|CSN4_MOUSE COP9 signalosome complex subunit 4 OS=Mus musculus (Mouse) OX=10090 GN=Cops4 PE=1 SV=1	COPS4	23	20	-3.99944e-17	1	1	FALSE	105	106	105	106	-0.0905207
Q60823	Q60823	>sp|Q60823|AKT2_MOUSE RAC-beta serine/threonine-protein kinase OS=Mus musculus (Mouse) OX=10090 GN=Akt2 PE=1 SV=1	AKT2	8	8	0	1	1	FALSE	38	38	38	38	-0.0448751
Q8CCB4	Q8CCB4	>sp|Q8CCB4|VPS53_MOUSE Vacuolar protein sorting-associated protein 53 homolog OS=Mus musculus (Mouse) OX=10090 GN=Vps53 PE=1 SV=1	VPS53	16	13	0	1	1	FALSE	74	72	74	72	0.0876805
Q80U23	Q80U23	>sp|Q80U23|SNPH_MOUSE Syntaphilin OS=Mus musculus (Mouse) OX=10090 GN=Snph PE=1 SV=3	SNPH	4	4	-0.0570535	0.236423	0.557728	FALSE	19	20	19	20	-0.285573
Q9EQI8	Q9EQI8	>sp|Q9EQI8|RM46_MOUSE 39S ribosomal protein L46, mitochondrial OS=Mus musculus (Mouse) OX=10090 GN=Mrpl46 PE=1 SV=1	MRPL46	6	6	0.148531	1.39182e-07	4.1118e-06	FALSE	29	29	29	29	-0.0458122
Q8CCK0	Q8CCK0	>sp|Q8CCK0|H2AW_MOUSE Core histone macro-H2A.2 OS=Mus musculus (Mouse) OX=10090 GN=H2afy2 PE=1 SV=3	H2AFY2	13	11	0.0850837	0.0235916	0.0973554	FALSE	60	58	60	58	0.120054
Q8BGV8	Q8BGV8	>sp|Q8BGV8|MID51_MOUSE Mitochondrial dynamics protein MID51 OS=Mus musculus (Mouse) OX=10090 GN=Mief1 PE=1 SV=1	MIEF1	3	3	7.37898e-16	1	1	FALSE	14	15	14	15	-0.36624
Q3TY65	Q3TY65	>sp|Q3TY65|ICA1L_MOUSE Islet cell autoantigen 1-like protein OS=Mus musculus (Mouse) OX=10090 GN=Ica1l PE=1 SV=1	ICA1L	4	4	-0.0985031	0.00734885	0.038365	FALSE	19	18	19	18	0.205938
P97411	P97411	>sp|P97411|ICA69_MOUSE Islet cell autoantigen 1 OS=Mus musculus (Mouse) OX=10090 GN=Ica1 PE=1 SV=3	ICA1	7	7	0.0672083	0.0530523	0.182311	FALSE	33	32	33	32	0.105014
Q99MX7	Q99MX7	>sp|Q99MX7|T121B_MOUSE Transmembrane protein 121B OS=Mus musculus (Mouse) OX=10090 GN=Tmem121b PE=1 SV=1	TMEM121B	3	3	0	1	1	FALSE	15	15	15	15	-0.0447409
Q62384	Q62384	>sp|Q62384|ZPR1_MOUSE Zinc finger protein ZPR1 OS=Mus musculus (Mouse) OX=10090 GN=Zpr1 PE=1 SV=1	ZPR1	8	8	0.0326656	0.226235	0.53937	FALSE	39	40	39	40	-0.166226
P0C7L0	P0C7L0	>sp|P0C7L0|WIPF3_MOUSE WAS/WASL-interacting protein family member 3 OS=Mus musculus (Mouse) OX=10090 GN=Wipf3 PE=1 SV=1	WIPF3	3	2	-0.18369	0.0345282	0.131324	FALSE	13	15	13	15	-0.701638
Q76MZ3	Q76MZ3	>sp|Q76MZ3|2AAA_MOUSE Serine/threonine-protein phosphatase 2A 65 kDa regulatory subunit A alpha isoform OS=Mus musculus (Mouse) OX=10090 GN=Ppp2r1a PE=1 SV=3	PPP2R1A	25	24	2.92626e-16	1	1	FALSE	125	123	125	123	0.0349499
Q3UH99	Q3UH99	>sp|Q3UH99|SHSA6_MOUSE Protein shisa-6 OS=Mus musculus (Mouse) OX=10090 GN=Shisa6 PE=1 SV=1	SHISA6	12	8	-0.0425081	0.194021	0.481546	FALSE	49	52	49	52	-0.332308
Q5KU39	Q5KU39	>sp|Q5KU39|VPS41_MOUSE Vacuolar protein sorting-associated protein 41 homolog OS=Mus musculus (Mouse) OX=10090 GN=Vps41 PE=1 SV=1	VPS41	12	11	0.0171871	0.408883	0.83822	FALSE	57	59	57	59	-0.210975
O35857	O35857	>sp|O35857|TIM44_MOUSE Mitochondrial import inner membrane translocase subunit TIM44 OS=Mus musculus (Mouse) OX=10090 GN=Timm44 PE=1 SV=2	TIMM44	18	18	0.096208	0.00219359	0.0145895	FALSE	90	87	90	87	0.121607
Q99K28	Q99K28	>sp|Q99K28|ARFG2_MOUSE ADP-ribosylation factor GTPase-activating protein 2 OS=Mus musculus (Mouse) OX=10090 GN=Arfgap2 PE=1 SV=1	ARFGAP2	10	10	-0.0843674	8.68316e-06	0.000146423	FALSE	49	48	49	48	0.0560249
Q5SFM8;Q6NZN0	Q5SFM8;Q6NZN0	>sp|Q5SFM8|RBM27_MOUSE RNA-binding protein 27 OS=Mus musculus (Mouse) OX=10090 GN=Rbm27 PE=1 SV=3;>sp|Q6NZN0|RBM26_MOUSE RNA-binding protein 26 OS=Mus musculus (Mouse) OX=10090 GN=Rbm26 PE=1 SV=2	RBM27;RBM26	1	1	0	1	1	FALSE	5	5	5	5	-0.046026
P70372	P70372	>sp|P70372|ELAV1_MOUSE ELAV-like protein 1 OS=Mus musculus (Mouse) OX=10090 GN=Elavl1 PE=1 SV=2	ELAVL1	13	13	3.21414e-16	1	1	FALSE	65	64	65	64	0.0309306
Q9JM13	Q9JM13	>sp|Q9JM13|RABX5_MOUSE Rab5 GDP/GTP exchange factor OS=Mus musculus (Mouse) OX=10090 GN=Rabgef1 PE=1 SV=1	RABGEF1	6	6	-0.076395	0.00520866	0.0291486	FALSE	30	30	30	30	-0.0443681
Q8BRK9	Q8BRK9	>sp|Q8BRK9|MA2A2_MOUSE Alpha-mannosidase 2x OS=Mus musculus (Mouse) OX=10090 GN=Man2a2 PE=1 SV=2	MAN2A2	10	7	-0.105572	4.96639e-06	9.16558e-05	FALSE	39	47	39	47	-0.942226
Q8BP67	Q8BP67	>sp|Q8BP67|RL24_MOUSE 60S ribosomal protein L24 OS=Mus musculus (Mouse) OX=10090 GN=Rpl24 PE=1 SV=2	RPL24	5	5	1.72671e-16	1	1	FALSE	25	25	25	25	-0.0444446
Q60759	Q60759	>sp|Q60759|GCDH_MOUSE Glutaryl-CoA dehydrogenase, mitochondrial OS=Mus musculus (Mouse) OX=10090 GN=Gcdh PE=1 SV=2	GCDH	6	6	0.0907098	0.0028153	0.01788	FALSE	30	29	30	29	0.116653
Q8R081	Q8R081	>sp|Q8R081|HNRPL_MOUSE Heterogeneous nuclear ribonucleoprotein L OS=Mus musculus (Mouse) OX=10090 GN=Hnrnpl PE=1 SV=2	HNRNPL	13	12	0.0307923	0.0656493	0.215495	FALSE	60	61	60	61	-0.124292
P46638;P62492	P46638;P62492	>sp|P46638|RB11B_MOUSE Ras-related protein Rab-11B OS=Mus musculus (Mouse) OX=10090 GN=Rab11b PE=1 SV=3;>sp|P62492|RB11A_MOUSE Ras-related protein Rab-11A OS=Mus musculus (Mouse) OX=10090 GN=Rab11a PE=1 SV=3	RAB11B;RAB11A	12	12	1.82511e-17	1	1	FALSE	60	60	60	60	-0.0441726
P35438	P35438	>sp|P35438|NMDZ1_MOUSE Glutamate receptor ionotropic, NMDA 1 OS=Mus musculus (Mouse) OX=10090 GN=Grin1 PE=1 SV=1	GRIN1	12	11	-1.11438e-16	1	1	FALSE	57	58	57	58	-0.12942
Q6P5E4	Q6P5E4	>sp|Q6P5E4|UGGG1_MOUSE UDP-glucose:glycoprotein glucosyltransferase 1 OS=Mus musculus (Mouse) OX=10090 GN=Uggt1 PE=1 SV=4	UGGT1	38	32	-0.0236288	0.399364	0.823367	FALSE	174	178	174	178	-0.155958
Q9Z2U0	Q9Z2U0	>sp|Q9Z2U0|PSA7_MOUSE Proteasome subunit alpha type-7 OS=Mus musculus (Mouse) OX=10090 GN=Psma7 PE=1 SV=1	PSMA7	13	12	-0.00823961	0.447475	0.894245	FALSE	63	59	63	59	0.274306
Q6GQT1	Q6GQT1	>sp|Q6GQT1|A2MG_MOUSE Alpha-2-macroglobulin-P OS=Mus musculus (Mouse) OX=10090 GN=A2m PE=2 SV=2	A2M	9	7	-0.0908323	0.00581269	0.0318164	FALSE	39	44	39	44	-0.627909
E9Q7X7	E9Q7X7	>sp|E9Q7X7|NRX2A_MOUSE Neurexin-2 OS=Mus musculus (Mouse) OX=10090 GN=Nrxn2 PE=1 SV=1	NRXN2	22	19	1.47843e-16	1	1	FALSE	108	102	108	102	0.23634
P97447	P97447	>sp|P97447|FHL1_MOUSE Four and a half LIM domains protein 1 OS=Mus musculus (Mouse) OX=10090 GN=Fhl1 PE=1 SV=3	FHL1	2	2	-0.103531	0.476953	0.938635	FALSE	10	10	10	10	-0.0450912
P14206	P14206	>sp|P14206|RSSA_MOUSE 40S ribosomal protein SA OS=Mus musculus (Mouse) OX=10090 GN=Rpsa PE=1 SV=4	RPSA	15	14	2.23585e-17	1	1	FALSE	74	73	74	73	0.0217321
Q9QXG2	Q9QXG2	>sp|Q9QXG2|RAE1_MOUSE Rab proteins geranylgeranyltransferase component A 1 OS=Mus musculus (Mouse) OX=10090 GN=Chm PE=1 SV=1	CHM	7	7	-1.2507e-18	1	1	FALSE	34	35	34	35	-0.184585
Q61771	Q61771	>sp|Q61771|KIF3B_MOUSE Kinesin-like protein KIF3B OS=Mus musculus (Mouse) OX=10090 GN=Kif3b PE=1 SV=1	KIF3B	11	10	1.2682e-17	1	1	FALSE	51	52	51	52	-0.13894
Q91WD4	Q91WD4	>sp|Q91WD4|CG025_MOUSE UPF0415 protein C7orf25 homolog OS=Mus musculus (Mouse) OX=10090 GN=MGI:2145422 PE=2 SV=1	MGI:2145422	1	1	0	1	1	FALSE	5	5	5	5	-0.046026
E9Q236	E9Q236	>tr|E9Q236|E9Q236_MOUSE ATP-binding cassette, sub-family C (CFTR/MRP), member 4 OS=Mus musculus (Mouse) OX=10090 GN=Abcc4 PE=1 SV=1	ABCC4	10	8	-0.0623945	0.10922	0.316171	FALSE	49	45	49	45	0.368603
O35188	O35188	>sp|O35188|X3CL1_MOUSE Fractalkine OS=Mus musculus (Mouse) OX=10090 GN=Cx3cl1 PE=1 SV=3	CX3CL1	2	2	-0.159137	0.00996441	0.0493174	FALSE	10	10	10	10	-0.0450912
P49117	P49117	>sp|P49117|NR2C2_MOUSE Nuclear receptor subfamily 2 group C member 2 OS=Mus musculus (Mouse) OX=10090 GN=Nr2c2 PE=1 SV=1	NR2C2	4	3	1.49263e-17	1	1	FALSE	16	17	16	17	-0.325275
Q60695	Q60695	>sp|Q60695|RGL1_MOUSE Ral guanine nucleotide dissociation stimulator-like 1 OS=Mus musculus (Mouse) OX=10090 GN=Rgl1 PE=1 SV=2	RGL1	3	3	-0.0136705	0.503945	0.979614	FALSE	14	14	14	14	-0.0427467
P53569	P53569	>sp|P53569|CEBPZ_MOUSE CCAAT/enhancer-binding protein zeta OS=Mus musculus (Mouse) OX=10090 GN=Cebpz PE=1 SV=2	CEBPZ	4	2	0.120331	0.0173603	0.0762654	FALSE	16	14	16	14	0.568672
Q69ZR2	Q69ZR2	>sp|Q69ZR2|HECD1_MOUSE E3 ubiquitin-protein ligase HECTD1 OS=Mus musculus (Mouse) OX=10090 GN=Hectd1 PE=1 SV=2	HECTD1	13	13	-0.00497242	0.703881	1	FALSE	63	64	63	64	-0.121399
Q8R420	Q8R420	>sp|Q8R420|ABCA3_MOUSE ATP-binding cassette sub-family A member 3 OS=Mus musculus (Mouse) OX=10090 GN=Abca3 PE=1 SV=3	ABCA3	13	11	-2.13768e-16	1	1	FALSE	58	58	58	58	-0.0475467
Q6A028	Q6A028	>sp|Q6A028|SWP70_MOUSE Switch-associated protein 70 OS=Mus musculus (Mouse) OX=10090 GN=Swap70 PE=1 SV=2	SWAP70	10	8	-0.125897	0.0177564	0.0777136	FALSE	42	44	42	44	-0.27015
P09671	P09671	>sp|P09671|SODM_MOUSE Superoxide dismutase [Mn], mitochondrial OS=Mus musculus (Mouse) OX=10090 GN=Sod2 PE=1 SV=3	SOD2	7	7	0.244668	5.17854e-05	0.000661153	FALSE	35	35	35	35	-0.0443129
Q8BH74	Q8BH74	>sp|Q8BH74|NU107_MOUSE Nuclear pore complex protein Nup107 OS=Mus musculus (Mouse) OX=10090 GN=Nup107 PE=1 SV=1	NUP107	14	13	-1.07214e-16	1	1	FALSE	69	66	69	66	0.172735
Q11136	Q11136	>sp|Q11136|PEPD_MOUSE Xaa-Pro dipeptidase OS=Mus musculus (Mouse) OX=10090 GN=Pepd PE=1 SV=3	PEPD	11	10	-0.107386	0.000610471	0.00506313	FALSE	53	52	53	52	0.0494513
P63154	P63154	>sp|P63154|CRNL1_MOUSE Crooked neck-like protein 1 OS=Mus musculus (Mouse) OX=10090 GN=Crnkl1 PE=1 SV=1	CRNKL1	6	4	0.0387887	0.231931	0.549854	FALSE	27	23	27	23	0.717838
Q8K0D5	Q8K0D5	>sp|Q8K0D5|EFGM_MOUSE Elongation factor G, mitochondrial OS=Mus musculus (Mouse) OX=10090 GN=Gfm1 PE=1 SV=1	GFM1	13	13	0.0885051	0.0154921	0.0699533	FALSE	65	64	65	64	0.0317153
Q9Z1G4	Q9Z1G4	>sp|Q9Z1G4|VPP1_MOUSE V-type proton ATPase 116 kDa subunit a isoform 1 OS=Mus musculus (Mouse) OX=10090 GN=Atp6v0a1 PE=1 SV=3	ATP6V0A1	24	23	1.25317e-18	1	1	FALSE	115	116	115	116	-0.0860222
Q6VH22	Q6VH22	>sp|Q6VH22|IF172_MOUSE Intraflagellar transport protein 172 homolog OS=Mus musculus (Mouse) OX=10090 GN=Ift172 PE=1 SV=1	IFT172	4	4	-0.0828599	0.00737925	0.038471	FALSE	19	19	19	19	-0.0467335
Q8BL65	Q8BL65	>sp|Q8BL65|ABLM2_MOUSE Actin-binding LIM protein 2 OS=Mus musculus (Mouse) OX=10090 GN=Ablim2 PE=1 SV=1	ABLIM2	7	7	0	1	1	FALSE	33	34	33	34	-0.187342
O55234	O55234	>sp|O55234|PSB5_MOUSE Proteasome subunit beta type-5 OS=Mus musculus (Mouse) OX=10090 GN=Psmb5 PE=1 SV=3	PSMB5	13	13	-1.22553e-18	1	1	FALSE	64	64	64	64	-0.0434367
Q3TCJ1	Q3TCJ1	>sp|Q3TCJ1|ABRX2_MOUSE BRISC complex subunit Abraxas 2 OS=Mus musculus (Mouse) OX=10090 GN=Abraxas2 PE=1 SV=1	ABRAXAS2	5	4	-0.0684373	0.0645603	0.212561	FALSE	22	21	22	21	0.172443
Q9ERZ3	Q9ERZ3	>sp|Q9ERZ3|ACM3_MOUSE Muscarinic acetylcholine receptor M3 OS=Mus musculus (Mouse) OX=10090 GN=Chrm3 PE=1 SV=1	CHRM3	3	2	0.335907	2.29374e-05	0.000331743	TRUE	15	12	15	12	0.981011
Q99KI0	Q99KI0	>sp|Q99KI0|ACON_MOUSE Aconitate hydratase, mitochondrial OS=Mus musculus (Mouse) OX=10090 GN=Aco2 PE=1 SV=1	ACO2	31	30	0.150005	0.000550434	0.00468385	FALSE	150	151	150	151	-0.0766236
O55143	O55143	>sp|O55143|AT2A2_MOUSE Sarcoplasmic/endoplasmic reticulum calcium ATPase 2 OS=Mus musculus (Mouse) OX=10090 GN=Atp2a2 PE=1 SV=2	ATP2A2	37	32	1.48441e-16	1	1	FALSE	173	174	173	174	-0.0723017
Q9D8N0	Q9D8N0	>sp|Q9D8N0|EF1G_MOUSE Elongation factor 1-gamma OS=Mus musculus (Mouse) OX=10090 GN=Eef1g PE=1 SV=3	EEF1G	13	13	0	1	1	FALSE	64	63	64	63	0.0335655
P22907	P22907	>sp|P22907|HEM3_MOUSE Porphobilinogen deaminase OS=Mus musculus (Mouse) OX=10090 GN=Hmbs PE=1 SV=2	HMBS	6	5	0.00978201	0.598016	1	FALSE	29	26	29	26	0.474849
P35803	P35803	>sp|P35803|GPM6B_MOUSE Neuronal membrane glycoprotein M6-b OS=Mus musculus (Mouse) OX=10090 GN=Gpm6b PE=1 SV=2	GPM6B	8	6	-0.149473	0.00403297	0.0238104	FALSE	35	36	35	36	-0.180007
O70318	O70318	>sp|O70318|E41L2_MOUSE Band 4.1-like protein 2 OS=Mus musculus (Mouse) OX=10090 GN=Epb41l2 PE=1 SV=2	EPB41L2	21	19	-0.118012	0.130963	0.362192	FALSE	96	102	96	102	-0.340671
D3Z7P3	D3Z7P3	>sp|D3Z7P3|GLSK_MOUSE Glutaminase kidney isoform, mitochondrial OS=Mus musculus (Mouse) OX=10090 GN=Gls PE=1 SV=1	GLS	26	23	0.0886516	0.10676	0.310821	FALSE	124	121	124	121	0.0757238
O70622	O70622	>sp|O70622|RTN2_MOUSE Reticulon-2 OS=Mus musculus (Mouse) OX=10090 GN=Rtn2 PE=1 SV=1	RTN2	2	1	0	1	1	FALSE	9	8	9	8	0.474357
Q80ZX0	Q80ZX0	>tr|Q80ZX0|Q80ZX0_MOUSE Sec24-related gene family, member B (S. cerevisiae) OS=Mus musculus (Mouse) OX=10090 GN=Sec24b PE=1 SV=1	SEC24B	20	18	-0.0111591	0.396611	0.818568	FALSE	91	91	91	91	-0.0446977
Q8R2Q4	Q8R2Q4	>sp|Q8R2Q4|RRF2M_MOUSE Ribosome-releasing factor 2, mitochondrial OS=Mus musculus (Mouse) OX=10090 GN=Gfm2 PE=1 SV=2	GFM2	6	4	-3.81771e-18	1	1	FALSE	28	23	28	23	0.893509
Q9CXT7	Q9CXT7	>sp|Q9CXT7|TM192_MOUSE Transmembrane protein 192 OS=Mus musculus (Mouse) OX=10090 GN=Tmem192 PE=1 SV=1	TMEM192	2	2	-0.0547827	0.262369	0.60325	FALSE	10	10	10	10	-0.0450912
Q8VCI5	Q8VCI5	>sp|Q8VCI5|PEX19_MOUSE Peroxisomal biogenesis factor 19 OS=Mus musculus (Mouse) OX=10090 GN=Pex19 PE=1 SV=1	PEX19	5	4	0.103891	0.000172773	0.00183665	FALSE	22	21	22	21	0.176596
Q9WUM5	Q9WUM5	>sp|Q9WUM5|SUCA_MOUSE Succinate--CoA ligase [ADP/GDP-forming] subunit alpha, mitochondrial OS=Mus musculus (Mouse) OX=10090 GN=Suclg1 PE=1 SV=4	SUCLG1	6	5	7.81455e-19	1	1	FALSE	30	28	30	28	0.28395
Q91UZ1	Q91UZ1	>tr|Q91UZ1|Q91UZ1_MOUSE 1-phosphatidylinositol 4,5-bisphosphate phosphodiesterase OS=Mus musculus (Mouse) OX=10090 GN=Plcb4 PE=1 SV=1	PLCB4	4	4	-2.46832e-15	1	1	FALSE	20	18	20	18	0.44894
P15864;P43274;P43277	P15864;P43274;P43277	>sp|P15864|H12_MOUSE Histone H1.2 OS=Mus musculus (Mouse) OX=10090 GN=H1-2 PE=1 SV=2;>sp|P43274|H14_MOUSE Histone H1.4 OS=Mus musculus (Mouse) OX=10090 GN=H1-4 PE=1 SV=2;>sp|P43277|H13_MOUSE Histone H1.3 OS=Mus musculus (Mouse) OX=10090 GN=H1-3 PE=1 SV=2	H1-2;H1-4;H1-3	1	1	0	1	1	FALSE	5	5	5	5	-0.046026
Q6NT99	Q6NT99	>sp|Q6NT99|DUS23_MOUSE Dual specificity protein phosphatase 23 OS=Mus musculus (Mouse) OX=10090 GN=Dusp23 PE=1 SV=1	DUSP23	1	1	-0.077663	0.140911	0.382622	FALSE	5	5	5	5	-0.046026
Q9CPW4	Q9CPW4	>sp|Q9CPW4|ARPC5_MOUSE Actin-related protein 2/3 complex subunit 5 OS=Mus musculus (Mouse) OX=10090 GN=Arpc5 PE=1 SV=3	ARPC5	6	6	-0.00524012	0.631605	1	FALSE	29	29	29	29	-0.0466274
P43276	P43276	>sp|P43276|H15_MOUSE Histone H1.5 OS=Mus musculus (Mouse) OX=10090 GN=H1-5 PE=1 SV=2	H1-5	3	3	-3.2274e-19	1	1	FALSE	15	15	15	15	-0.0447409
Q80U72	Q80U72	>sp|Q80U72|SCRIB_MOUSE Protein scribble homolog OS=Mus musculus (Mouse) OX=10090 GN=Scrib PE=1 SV=2	SCRIB	18	17	-0.150322	2.60577e-06	5.38244e-05	FALSE	85	85	85	85	-0.0446435
Q8BTW9	Q8BTW9	>sp|Q8BTW9|PAK4_MOUSE Serine/threonine-protein kinase PAK 4 OS=Mus musculus (Mouse) OX=10090 GN=Pak4 PE=1 SV=1	PAK4	5	4	6.27545e-16	1	1	FALSE	25	23	25	23	0.348905
P49717	P49717	>sp|P49717|MCM4_MOUSE DNA replication licensing factor MCM4 OS=Mus musculus (Mouse) OX=10090 GN=Mcm4 PE=1 SV=1	MCM4	6	5	-7.26259e-21	1	1	FALSE	28	27	28	27	0.127228
Q91V83	Q91V83	>sp|Q91V83|TTI1_MOUSE TELO2-interacting protein 1 homolog OS=Mus musculus (Mouse) OX=10090 GN=Tti1 PE=1 SV=2	TTI1	3	2	-4.88308e-18	1	1	FALSE	13	14	13	14	-0.383592
Q9JIM1	Q9JIM1	>sp|Q9JIM1|S29A1_MOUSE Equilibrative nucleoside transporter 1 OS=Mus musculus (Mouse) OX=10090 GN=Slc29a1 PE=1 SV=3	SLC29A1	1	1	0	1	1	FALSE	5	5	5	5	-0.046026
Q99LP6	Q99LP6	>sp|Q99LP6|GRPE1_MOUSE GrpE protein homolog 1, mitochondrial OS=Mus musculus (Mouse) OX=10090 GN=Grpel1 PE=1 SV=1	GRPEL1	6	6	1.15616e-18	1	1	FALSE	29	29	29	29	-0.0453029
Q80ZJ7	Q80ZJ7	>sp|Q80ZJ7|SNX32_MOUSE Sorting nexin-32 OS=Mus musculus (Mouse) OX=10090 GN=Snx32 PE=2 SV=1	SNX32	5	5	-0.172183	0.00176448	0.0121556	FALSE	23	25	23	25	-0.440807
O88485	O88485	>sp|O88485|DC1I1_MOUSE Cytoplasmic dynein 1 intermediate chain 1 OS=Mus musculus (Mouse) OX=10090 GN=Dync1i1 PE=1 SV=2	DYNC1I1	9	7	0.0130525	0.623986	1	FALSE	40	38	40	38	0.202108
A2BDX3	A2BDX3	>sp|A2BDX3|MOCS3_MOUSE Adenylyltransferase and sulfurtransferase MOCS3 OS=Mus musculus (Mouse) OX=10090 GN=Mocs3 PE=1 SV=1	MOCS3	6	5	0	1	1	FALSE	26	26	26	26	-0.0464313
P51855	P51855	>sp|P51855|GSHB_MOUSE Glutathione synthetase OS=Mus musculus (Mouse) OX=10090 GN=Gss PE=1 SV=1	GSS	7	6	-0.0178672	0.400177	0.824588	FALSE	32	31	32	31	0.107237
Q922J9	Q922J9	>sp|Q922J9|FACR1_MOUSE Fatty acyl-CoA reductase 1 OS=Mus musculus (Mouse) OX=10090 GN=Far1 PE=1 SV=1	FAR1	11	9	-0.00918636	0.62568	1	FALSE	53	52	53	52	0.0491333
Q9ESK3	Q9ESK3	>sp|Q9ESK3|CAN10_MOUSE Calpain-10 OS=Mus musculus (Mouse) OX=10090 GN=Capn10 PE=2 SV=2	CAPN10	5	4	-0.0317943	0.229853	0.546115	FALSE	19	20	19	20	-0.284408
Q93092	Q93092	>sp|Q93092|TALDO_MOUSE Transaldolase OS=Mus musculus (Mouse) OX=10090 GN=Taldo1 PE=1 SV=2	TALDO1	16	16	-0.036739	0.122758	0.345552	FALSE	80	79	80	79	0.0176102
Q64311	Q64311	>sp|Q64311|NTAN1_MOUSE Protein N-terminal asparagine amidohydrolase OS=Mus musculus (Mouse) OX=10090 GN=Ntan1 PE=1 SV=3	NTAN1	2	1	0	1	1	FALSE	6	6	6	6	-0.0474967
Q8BTY8	Q8BTY8	>sp|Q8BTY8|SCFD2_MOUSE Sec1 family domain-containing protein 2 OS=Mus musculus (Mouse) OX=10090 GN=Scfd2 PE=1 SV=1	SCFD2	12	11	-0.021791	0.162099	0.423896	FALSE	56	59	56	59	-0.298951
Q3TLP5	Q3TLP5	>sp|Q3TLP5|ECHD2_MOUSE Enoyl-CoA hydratase domain-containing protein 2, mitochondrial OS=Mus musculus (Mouse) OX=10090 GN=Echdc2 PE=1 SV=2	ECHDC2	4	2	-0.122752	0.0133975	0.0623796	FALSE	15	15	15	15	-0.0467125
Q3TZZ7	Q3TZZ7	>sp|Q3TZZ7|ESYT2_MOUSE Extended synaptotagmin-2 OS=Mus musculus (Mouse) OX=10090 GN=Esyt2 PE=1 SV=1	ESYT2	10	9	3.87395e-19	1	1	FALSE	48	45	48	45	0.268856
Q9CZP5	Q9CZP5	>sp|Q9CZP5|BCS1_MOUSE Mitochondrial chaperone BCS1 OS=Mus musculus (Mouse) OX=10090 GN=Bcs1l PE=1 SV=1	BCS1L	12	12	0.179275	6.28863e-07	1.52165e-05	FALSE	59	60	59	60	-0.125536
O35382	O35382	>sp|O35382|EXOC4_MOUSE Exocyst complex component 4 OS=Mus musculus (Mouse) OX=10090 GN=Exoc4 PE=1 SV=2	EXOC4	29	22	-0.0359832	0.0151038	0.0684432	FALSE	136	133	136	133	0.0669383
P35285	P35285	>sp|P35285|RB22A_MOUSE Ras-related protein Rab-22A OS=Mus musculus (Mouse) OX=10090 GN=Rab22a PE=1 SV=2	RAB22A	7	6	-7.16994e-17	1	1	FALSE	33	33	33	33	-0.0408633
Q91W90	Q91W90	>sp|Q91W90|TXND5_MOUSE Thioredoxin domain-containing protein 5 OS=Mus musculus (Mouse) OX=10090 GN=Txndc5 PE=1 SV=2	TXNDC5	11	9	-0.10555	0.181378	0.45792	FALSE	51	52	51	52	-0.140009
P42925	P42925	>sp|P42925|PXMP2_MOUSE Peroxisomal membrane protein 2 OS=Mus musculus (Mouse) OX=10090 GN=Pxmp2 PE=1 SV=2	PXMP2	2	1	0	1	1	FALSE	8	10	8	10	-1.03678
Q9D483	Q9D483	>sp|Q9D483|RPC3_MOUSE DNA-directed RNA polymerase III subunit RPC3 OS=Mus musculus (Mouse) OX=10090 GN=Polr3c PE=1 SV=1	POLR3C	2	1	0.0996614	0.0867355	0.266464	FALSE	9	7	9	7	1.06171
P26443	P26443	>sp|P26443|DHE3_MOUSE Glutamate dehydrogenase 1, mitochondrial OS=Mus musculus (Mouse) OX=10090 GN=Glud1 PE=1 SV=1	GLUD1	31	29	0	1	1	FALSE	151	152	151	152	-0.0757441
Q8VHQ9	Q8VHQ9	>sp|Q8VHQ9|ACO11_MOUSE Acyl-coenzyme A thioesterase 11 OS=Mus musculus (Mouse) OX=10090 GN=Acot11 PE=1 SV=1	ACOT11	8	6	-0.100932	0.00403725	0.0238173	FALSE	37	35	37	35	0.224225
A2AN08	A2AN08	>sp|A2AN08|UBR4_MOUSE E3 ubiquitin-protein ligase UBR4 OS=Mus musculus (Mouse) OX=10090 GN=Ubr4 PE=1 SV=1	UBR4	49	40	-0.355204	2.06144e-17	7.85614e-15	TRUE	205	232	205	232	-0.652632
Q3TC72	Q3TC72	>sp|Q3TC72|FAHD2_MOUSE Fumarylacetoacetate hydrolase domain-containing protein 2A OS=Mus musculus (Mouse) OX=10090 GN=Fahd2 PE=1 SV=1	FAHD2	4	4	0	1	1	FALSE	19	20	19	20	-0.283574
Q8BPM2	Q8BPM2	>sp|Q8BPM2|M4K5_MOUSE Mitogen-activated protein kinase kinase kinase kinase 5 OS=Mus musculus (Mouse) OX=10090 GN=Map4k5 PE=1 SV=2	MAP4K5	9	7	7.85096e-20	1	1	FALSE	42	40	42	40	0.190287
Q9D898	Q9D898	>sp|Q9D898|ARP5L_MOUSE Actin-related protein 2/3 complex subunit 5-like protein OS=Mus musculus (Mouse) OX=10090 GN=Arpc5l PE=1 SV=1	ARPC5L	5	5	-0.0136213	0.588316	1	FALSE	25	25	25	25	-0.0444446
A2A699	A2A699	>sp|A2A699|F1712_MOUSE Protein FAM171A2 OS=Mus musculus (Mouse) OX=10090 GN=Fam171a2 PE=1 SV=1	FAM171A2	16	15	0.130944	0.000908505	0.00703008	FALSE	78	77	78	77	0.0193802
Q9CRT8	Q9CRT8	>sp|Q9CRT8|XPOT_MOUSE Exportin-T OS=Mus musculus (Mouse) OX=10090 GN=Xpot PE=1 SV=3	XPOT	16	15	-0.0887446	0.0215177	0.0905623	FALSE	70	74	70	74	-0.315564
Q9JIG8	Q9JIG8	>sp|Q9JIG8|PRAF2_MOUSE PRA1 family protein 2 OS=Mus musculus (Mouse) OX=10090 GN=Praf2 PE=1 SV=1	PRAF2	3	2	2.33892e-17	1	1	FALSE	13	15	13	15	-0.706163
Q6P9N1	Q6P9N1	>sp|Q6P9N1|HYCCI_MOUSE Hyccin OS=Mus musculus (Mouse) OX=10090 GN=Fam126a PE=1 SV=3	FAM126A	4	4	-0.0279371	0.252771	0.586377	FALSE	20	19	20	19	0.195426
O88351	O88351	>sp|O88351|IKKB_MOUSE Inhibitor of nuclear factor kappa-B kinase subunit beta OS=Mus musculus (Mouse) OX=10090 GN=Ikbkb PE=1 SV=1	IKBKB	7	6	0	1	1	FALSE	32	30	32	30	0.262906
Q9D8S4	Q9D8S4	>sp|Q9D8S4|ORN_MOUSE Oligoribonuclease, mitochondrial OS=Mus musculus (Mouse) OX=10090 GN=Rexo2 PE=1 SV=2	REXO2	4	4	0.0581801	0.0554433	0.188404	FALSE	20	20	20	20	-0.0445575
P46471	P46471	>sp|P46471|PRS7_MOUSE 26S proteasome regulatory subunit 7 OS=Mus musculus (Mouse) OX=10090 GN=Psmc2 PE=1 SV=5	PSMC2	21	21	-0.0637436	2.66789e-06	5.49586e-05	FALSE	105	105	105	105	-0.0440869
B1AWN6	B1AWN6	>sp|B1AWN6|SCN2A_MOUSE Sodium channel protein type 2 subunit alpha OS=Mus musculus (Mouse) OX=10090 GN=Scn2a PE=1 SV=1	SCN2A	12	9	-0.0636362	0.0832948	0.258394	FALSE	53	55	53	55	-0.223447
P21460	P21460	>sp|P21460|CYTC_MOUSE Cystatin-C OS=Mus musculus (Mouse) OX=10090 GN=Cst3 PE=1 SV=2	CST3	2	2	-0.267907	0.14828	0.396836	FALSE	10	10	10	10	-0.0450912
Q71LX4	Q71LX4	>sp|Q71LX4|TLN2_MOUSE Talin-2 OS=Mus musculus (Mouse) OX=10090 GN=Tln2 PE=1 SV=3	TLN2	37	31	-0.331021	2.16885e-10	1.43748e-08	TRUE	161	177	161	177	-0.509039
Q08652	Q08652	>sp|Q08652|RET2_MOUSE Retinol-binding protein 2 OS=Mus musculus (Mouse) OX=10090 GN=Rbp2 PE=2 SV=2	RBP2	2	2	0	1	1	FALSE	9	9	9	9	-0.0432059
Q924C1	Q924C1	>sp|Q924C1|XPO5_MOUSE Exportin-5 OS=Mus musculus (Mouse) OX=10090 GN=Xpo5 PE=1 SV=1	XPO5	21	19	0.0674152	2.67517e-05	0.000378296	FALSE	102	98	102	98	0.15112
Q9JM62	Q9JM62	>sp|Q9JM62|REEP6_MOUSE Receptor expression-enhancing protein 6 OS=Mus musculus (Mouse) OX=10090 GN=Reep6 PE=1 SV=1	REEP6	2	2	-0.322574	2.79443e-05	0.000394258	TRUE	10	10	10	10	-0.0450912
Q8VD33	Q8VD33	>sp|Q8VD33|SGTB_MOUSE Small glutamine-rich tetratricopeptide repeat-containing protein beta OS=Mus musculus (Mouse) OX=10090 GN=Sgtb PE=1 SV=1	SGTB	3	3	-0.120372	0.278051	0.631308	FALSE	15	15	15	15	-0.0447409
Q64512	Q64512	>sp|Q64512|PTN13_MOUSE Tyrosine-protein phosphatase non-receptor type 13 OS=Mus musculus (Mouse) OX=10090 GN=Ptpn13 PE=1 SV=2	PTPN13	14	9	-0.10896	0.0753355	0.238679	FALSE	53	62	53	62	-0.809061
P12265	P12265	>sp|P12265|BGLR_MOUSE Beta-glucuronidase OS=Mus musculus (Mouse) OX=10090 GN=Gusb PE=1 SV=2	GUSB	8	6	-0.0405969	0.289633	0.648335	FALSE	35	35	35	35	-0.0445551
D3YZU1	D3YZU1	>sp|D3YZU1|SHAN1_MOUSE SH3 and multiple ankyrin repeat domains protein 1 OS=Mus musculus (Mouse) OX=10090 GN=Shank1 PE=1 SV=1	SHANK1	15	12	-6.33313e-17	1	1	FALSE	65	68	65	68	-0.263281
Q9QY81	Q9QY81	>sp|Q9QY81|PO210_MOUSE Nuclear pore membrane glycoprotein 210 OS=Mus musculus (Mouse) OX=10090 GN=Nup210 PE=1 SV=2	NUP210	21	17	-4.66291e-16	1	1	FALSE	95	94	95	94	0.00815842
O08663	O08663	>sp|O08663|MAP2_MOUSE Methionine aminopeptidase 2 OS=Mus musculus (Mouse) OX=10090 GN=Metap2 PE=1 SV=1	METAP2	6	3	0.112939	0.00926052	0.0463148	FALSE	27	24	27	24	0.513545
E9PXF0	E9PXF0	>tr|E9PXF0|E9PXF0_MOUSE Protocadherin 17 OS=Mus musculus (Mouse) OX=10090 GN=Pcdh17 PE=1 SV=1	PCDH17	8	8	-0.0426164	0.292458	0.65236	FALSE	40	40	40	40	-0.0442712
Q3UHD1	Q3UHD1	>sp|Q3UHD1|AGRB1_MOUSE Adhesion G protein-coupled receptor B1 OS=Mus musculus (Mouse) OX=10090 GN=Adgrb1 PE=1 SV=1	ADGRB1	8	8	0	1	1	FALSE	40	39	40	39	0.0769848
P70302	P70302	>sp|P70302|STIM1_MOUSE Stromal interaction molecule 1 OS=Mus musculus (Mouse) OX=10090 GN=Stim1 PE=1 SV=2	STIM1	8	8	6.74569e-19	1	1	FALSE	39	38	39	38	0.0816525
Q8BM55	Q8BM55	>sp|Q8BM55|TM214_MOUSE Transmembrane protein 214 OS=Mus musculus (Mouse) OX=10090 GN=Tmem214 PE=1 SV=1	TMEM214	8	8	-0.115573	0.0162333	0.0725264	FALSE	39	39	39	39	-0.0453517
Q6NZB0	Q6NZB0	>sp|Q6NZB0|DNJC8_MOUSE DnaJ homolog subfamily C member 8 OS=Mus musculus (Mouse) OX=10090 GN=Dnajc8 PE=1 SV=2	DNAJC8	3	3	1.75873e-18	1	1	FALSE	15	15	15	15	-0.0447409
Q3TMH2	Q3TMH2	>sp|Q3TMH2|SCRN3_MOUSE Secernin-3 OS=Mus musculus (Mouse) OX=10090 GN=Scrn3 PE=1 SV=1	SCRN3	8	5	-1.74102e-15	1	1	FALSE	36	33	36	33	0.371463
Q00915	Q00915	>sp|Q00915|RET1_MOUSE Retinol-binding protein 1 OS=Mus musculus (Mouse) OX=10090 GN=Rbp1 PE=1 SV=2	RBP1	11	5	6.38984e-19	1	1	FALSE	46	41	46	41	0.506083
Q8BYN5	Q8BYN5	>sp|Q8BYN5|FSD1L_MOUSE FSD1-like protein OS=Mus musculus (Mouse) OX=10090 GN=Fsd1l PE=1 SV=2	FSD1L	7	7	0.0528422	0.0517673	0.179432	FALSE	35	35	35	35	-0.0443129
P46660	P46660	>sp|P46660|AINX_MOUSE Alpha-internexin OS=Mus musculus (Mouse) OX=10090 GN=Ina PE=1 SV=3	INA	14	13	4.88784e-17	1	1	FALSE	70	67	70	67	0.169561
O35250	O35250	>sp|O35250|EXOC7_MOUSE Exocyst complex component 7 OS=Mus musculus (Mouse) OX=10090 GN=Exoc7 PE=1 SV=2	EXOC7	21	21	-0.0458191	0.00119509	0.00887198	FALSE	103	105	103	105	-0.137999
Q6P2K6	Q6P2K6	>sp|Q6P2K6|P4R3A_MOUSE Serine/threonine-protein phosphatase 4 regulatory subunit 3A OS=Mus musculus (Mouse) OX=10090 GN=Ppp4r3a PE=1 SV=1	PPP4R3A	9	8	5.00178e-17	1	1	FALSE	44	43	44	43	0.0669821
O08638;Q61879	O08638;Q61879	>sp|O08638|MYH11_MOUSE Myosin-11 OS=Mus musculus (Mouse) OX=10090 GN=Myh11 PE=1 SV=1;>sp|Q61879|MYH10_MOUSE Myosin-10 OS=Mus musculus (Mouse) OX=10090 GN=Myh10 PE=1 SV=2	MYH11;MYH10	3	3	-0.82626	0.000633551	0.00522134	TRUE	15	15	15	15	-0.0447409
Q8VDD5	Q8VDD5	>sp|Q8VDD5|MYH9_MOUSE Myosin-9 OS=Mus musculus (Mouse) OX=10090 GN=Myh9 PE=1 SV=4	MYH9	83	72	-0.560312	0.00603099	0.0328344	FALSE	381	400	381	400	-0.283618
Q80VE5	Q80VE5	>tr|Q80VE5|Q80VE5_MOUSE Rab-GAP TBC domain-containing protein OS=Mus musculus (Mouse) OX=10090 GN=Tbc1d22b PE=1 SV=1	TBC1D22B	7	6	0	1	1	FALSE	32	31	32	31	0.106649
P55821	P55821	>sp|P55821|STMN2_MOUSE Stathmin-2 OS=Mus musculus (Mouse) OX=10090 GN=Stmn2 PE=1 SV=1	STMN2	3	3	0.454527	8.27597e-08	2.59586e-06	TRUE	15	15	15	15	-0.0447409
O70166	O70166	>sp|O70166|STMN3_MOUSE Stathmin-3 OS=Mus musculus (Mouse) OX=10090 GN=Stmn3 PE=1 SV=1	STMN3	3	3	0.239206	9.03256e-05	0.0010654	FALSE	15	15	15	15	-0.0447409
P02535	P02535	>sp|P02535|K1C10_MOUSE Keratin, type I cytoskeletal 10 OS=Mus musculus (Mouse) OX=10090 GN=Krt10 PE=1 SV=3	KRT10	6	4	0.925242	6.25181e-05	0.00077989	TRUE	29	22	29	22	1.26769
Q6EDY6	Q6EDY6	>sp|Q6EDY6|CARL1_MOUSE F-actin-uncapping protein LRRC16A OS=Mus musculus (Mouse) OX=10090 GN=Carmil1 PE=1 SV=2	CARMIL1	11	9	6.58352e-14	0.999999	1	FALSE	53	49	53	49	0.335765
F6ZE64	F6ZE64	>tr|F6ZE64|F6ZE64_MOUSE LON peptidase N-terminal domain and ring finger 2 OS=Mus musculus (Mouse) OX=10090 GN=Lonrf2 PE=4 SV=1	LONRF2	3	2	7.17912e-19	1	1	FALSE	14	10	14	10	1.48873
P70303;P70698	P70303;P70698	>sp|P70303|PYRG2_MOUSE CTP synthase 2 OS=Mus musculus (Mouse) OX=10090 GN=Ctps2 PE=1 SV=1;>sp|P70698|PYRG1_MOUSE CTP synthase 1 OS=Mus musculus (Mouse) OX=10090 GN=Ctps1 PE=1 SV=2	CTPS2;CTPS1	2	2	0	1	1	FALSE	9	10	9	10	-0.520056
Q8K0U4	Q8K0U4	>sp|Q8K0U4|HS12A_MOUSE Heat shock 70 kDa protein 12A OS=Mus musculus (Mouse) OX=10090 GN=Hspa12a PE=1 SV=1	HSPA12A	34	28	0.088347	0.0206685	0.0875196	FALSE	154	148	154	148	0.15025
Q8C437	Q8C437	>sp|Q8C437|PEX5R_MOUSE PEX5-related protein OS=Mus musculus (Mouse) OX=10090 GN=Pex5l PE=1 SV=2	PEX5L	2	2	0.131882	0.119207	0.338146	FALSE	10	10	10	10	-0.0450912
Q60902	Q60902	>sp|Q60902|EP15R_MOUSE Epidermal growth factor receptor substrate 15-like 1 OS=Mus musculus (Mouse) OX=10090 GN=Eps15l1 PE=1 SV=3	EPS15L1	23	19	0.0699073	0.0160228	0.0717497	FALSE	108	103	108	103	0.186254
Q9WUD1	Q9WUD1	>sp|Q9WUD1|CHIP_MOUSE STIP1 homology and U box-containing protein 1 OS=Mus musculus (Mouse) OX=10090 GN=Stub1 PE=1 SV=1	STUB1	8	8	0.0238936	0.165419	0.429601	FALSE	40	40	40	40	-0.0442712
P21619	P21619	>sp|P21619|LMNB2_MOUSE Lamin-B2 OS=Mus musculus (Mouse) OX=10090 GN=Lmnb2 PE=1 SV=2	LMNB2	13	13	0.104409	0.000435848	0.00388309	FALSE	65	65	65	65	-0.0441573
Q91Z92	Q91Z92	>sp|Q91Z92|B3GT6_MOUSE Beta-1,3-galactosyltransferase 6 OS=Mus musculus (Mouse) OX=10090 GN=B3galt6 PE=2 SV=1	B3GALT6	3	2	0.0298144	0.335868	0.720455	FALSE	13	14	13	14	-0.387032
P26041;P26043	P26041;P26043	>sp|P26041|MOES_MOUSE Moesin OS=Mus musculus (Mouse) OX=10090 GN=Msn PE=1 SV=3;>sp|P26043|RADI_MOUSE Radixin OS=Mus musculus (Mouse) OX=10090 GN=Rdx PE=1 SV=3	MSN;RDX	1	1	-0.0321284	0.523396	1	FALSE	5	5	5	5	-0.046026
Q9D6N5	Q9D6N5	>sp|Q9D6N5|NC2A_MOUSE Dr1-associated corepressor OS=Mus musculus (Mouse) OX=10090 GN=Drap1 PE=1 SV=3	DRAP1	4	4	9.81129e-18	1	1	FALSE	19	19	19	19	-0.0456037
O09012	O09012	>sp|O09012|PEX5_MOUSE Peroxisomal targeting signal 1 receptor OS=Mus musculus (Mouse) OX=10090 GN=Pex5 PE=1 SV=2	PEX5	16	15	-1.34522e-17	1	1	FALSE	76	73	76	73	0.151902
Q9JKY5	Q9JKY5	>sp|Q9JKY5|HIP1R_MOUSE Huntingtin-interacting protein 1-related protein OS=Mus musculus (Mouse) OX=10090 GN=Hip1r PE=1 SV=2	HIP1R	24	22	-0.183757	2.93034e-08	1.05853e-06	FALSE	114	114	114	114	-0.0438691
Q99PI5	Q99PI5	>sp|Q99PI5|LPIN2_MOUSE Phosphatidate phosphatase LPIN2 OS=Mus musculus (Mouse) OX=10090 GN=Lpin2 PE=1 SV=2	LPIN2	4	4	0.0328063	0.222704	0.533119	FALSE	19	19	19	19	-0.0450253
Q8C4Y3	Q8C4Y3	>sp|Q8C4Y3|NELFB_MOUSE Negative elongation factor B OS=Mus musculus (Mouse) OX=10090 GN=Nelfb PE=1 SV=2	NELFB	2	2	-0.0136971	0.535503	1	FALSE	10	10	10	10	-0.0450912
P27773	P27773	>sp|P27773|PDIA3_MOUSE Protein disulfide-isomerase A3 OS=Mus musculus (Mouse) OX=10090 GN=Pdia3 PE=1 SV=2	PDIA3	34	34	-0.036741	0.2097	0.510976	FALSE	168	168	168	168	-0.0439139
Q810J8	Q810J8	>sp|Q810J8|ZFYV1_MOUSE Zinc finger FYVE domain-containing protein 1 OS=Mus musculus (Mouse) OX=10090 GN=Zfyve1 PE=1 SV=2	ZFYVE1	7	5	-1.10707e-18	1	1	FALSE	32	30	32	30	0.26534
Q8VH51	Q8VH51	>sp|Q8VH51|RBM39_MOUSE RNA-binding protein 39 OS=Mus musculus (Mouse) OX=10090 GN=Rbm39 PE=1 SV=2	RBM39	8	8	1.11323e-17	1	1	FALSE	40	39	40	39	0.0784501
Q9D9K3	Q9D9K3	>sp|Q9D9K3|AVEN_MOUSE Cell death regulator Aven OS=Mus musculus (Mouse) OX=10090 GN=Aven PE=1 SV=2	AVEN	2	1	0	1	1	FALSE	10	8	10	8	0.946745
Q8BUW1	Q8BUW1	>tr|Q8BUW1|Q8BUW1_MOUSE Potassium channel, subfamily K, member 10 OS=Mus musculus (Mouse) OX=10090 GN=Kcnk10 PE=1 SV=1	KCNK10	3	2	-0.0825286	0.0508455	0.177204	FALSE	10	14	10	14	-1.57622
Q9JKF1	Q9JKF1	>sp|Q9JKF1|IQGA1_MOUSE Ras GTPase-activating-like protein IQGAP1 OS=Mus musculus (Mouse) OX=10090 GN=Iqgap1 PE=1 SV=2	IQGAP1	37	34	-0.0971586	0.195327	0.483528	FALSE	178	181	178	181	-0.126191
P60122	P60122	>sp|P60122|RUVB1_MOUSE RuvB-like 1 OS=Mus musculus (Mouse) OX=10090 GN=Ruvbl1 PE=1 SV=1	RUVBL1	16	15	0	1	1	FALSE	75	76	75	76	-0.108679
Q8K4Q0	Q8K4Q0	>sp|Q8K4Q0|RPTOR_MOUSE Regulatory-associated protein of mTOR OS=Mus musculus (Mouse) OX=10090 GN=Rptor PE=1 SV=1	RPTOR	14	11	-0.00652064	0.600582	1	FALSE	63	65	63	65	-0.193757
E9Q7G0	E9Q7G0	>sp|E9Q7G0|NUMA1_MOUSE Nuclear mitotic apparatus protein 1 OS=Mus musculus (Mouse) OX=10090 GN=Numa1 PE=1 SV=1	NUMA1	16	9	-0.336227	4.01494e-11	3.302e-09	TRUE	57	74	57	74	-1.31509
Q9ESX5	Q9ESX5	>sp|Q9ESX5|DKC1_MOUSE H/ACA ribonucleoprotein complex subunit DKC1 OS=Mus musculus (Mouse) OX=10090 GN=Dkc1 PE=1 SV=4	DKC1	7	6	6.52298e-18	1	1	FALSE	35	33	35	33	0.239004
Q3UHQ6;Q8BL99	Q3UHQ6;Q8BL99	>sp|Q3UHQ6|DOP2_MOUSE Protein dopey-2 OS=Mus musculus (Mouse) OX=10090 GN=Dop1b PE=1 SV=3;>sp|Q8BL99|DOP1_MOUSE Protein dopey-1 OS=Mus musculus (Mouse) OX=10090 GN=Dop1a PE=1 SV=2	DOP1B;DOP1A	1	1	0	1	1	FALSE	4	4	4	4	-0.0457161
P23116	P23116	>sp|P23116|EIF3A_MOUSE Eukaryotic translation initiation factor 3 subunit A OS=Mus musculus (Mouse) OX=10090 GN=Eif3a PE=1 SV=5	EIF3A	46	46	0.0373411	0.109297	0.316272	FALSE	230	227	230	227	0.0206349
Q9JLM9	Q9JLM9	>sp|Q9JLM9|GRB14_MOUSE Growth factor receptor-bound protein 14 OS=Mus musculus (Mouse) OX=10090 GN=Grb14 PE=1 SV=1	GRB14	5	3	0.377338	5.99755e-10	3.41144e-08	TRUE	24	19	24	19	1.05746
Q9JLI8	Q9JLI8	>sp|Q9JLI8|SART3_MOUSE Squamous cell carcinoma antigen recognized by T-cells 3 OS=Mus musculus (Mouse) OX=10090 GN=Sart3 PE=1 SV=1	SART3	13	12	4.16262e-18	1	1	FALSE	60	63	60	63	-0.28008
Q52KF3	Q52KF3	>sp|Q52KF3|SPIR1_MOUSE Protein spire homolog 1 OS=Mus musculus (Mouse) OX=10090 GN=Spire1 PE=1 SV=1	SPIRE1	8	7	1.64825e-17	1	1	FALSE	37	39	37	39	-0.297267
Q64010	Q64010	>sp|Q64010|CRK_MOUSE Adapter molecule crk OS=Mus musculus (Mouse) OX=10090 GN=Crk PE=1 SV=1	CRK	11	10	0.00805049	0.540095	1	FALSE	54	52	54	52	0.140059
P62484	P62484	>sp|P62484|ABI2_MOUSE Abl interactor 2 OS=Mus musculus (Mouse) OX=10090 GN=Abi2 PE=1 SV=1	ABI2	6	6	-0.106417	0.000353264	0.00327564	FALSE	30	30	30	30	-0.0443681
Q3UHN9	Q3UHN9	>sp|Q3UHN9|NDST1_MOUSE Bifunctional heparan sulfate N-deacetylase/N-sulfotransferase 1 OS=Mus musculus (Mouse) OX=10090 GN=Ndst1 PE=1 SV=2	NDST1	7	4	0	1	1	FALSE	27	31	27	31	-0.701614
E9PZJ8	E9PZJ8	>sp|E9PZJ8|ASCC3_MOUSE Activating signal cointegrator 1 complex subunit 3 OS=Mus musculus (Mouse) OX=10090 GN=Ascc3 PE=1 SV=1	ASCC3	6	1	-0.246404	0.0240024	0.0987832	FALSE	11	25	11	25	-3.8696
Q9CRD2	Q9CRD2	>sp|Q9CRD2|EMC2_MOUSE ER membrane protein complex subunit 2 OS=Mus musculus (Mouse) OX=10090 GN=Emc2 PE=1 SV=1	EMC2	10	9	4.55642e-15	1	1	FALSE	47	48	47	48	-0.145846
Q9QXL8	Q9QXL8	>sp|Q9QXL8|NDK7_MOUSE Nucleoside diphosphate kinase 7 OS=Mus musculus (Mouse) OX=10090 GN=Nme7 PE=1 SV=1	NME7	7	7	-5.98562e-17	1	1	FALSE	34	34	34	34	-0.0449037
A0A2I3BR81	A0A2I3BR81	>tr|A0A2I3BR81|A0A2I3BR81_MOUSE 5'-nucleotidase domain-containing 2 OS=Mus musculus (Mouse) OX=10090 GN=Nt5dc2 PE=1 SV=1	NT5DC2	14	11	-0.171423	0.000123591	0.00139764	FALSE	64	64	64	64	-0.0451281
Q3UFQ8	Q3UFQ8	>sp|Q3UFQ8|CARL3_MOUSE Capping protein, Arp2/3 and myosin-I linker protein 3 OS=Mus musculus (Mouse) OX=10090 GN=Carmil3 PE=1 SV=2	CARMIL3	12	10	-0.105116	0.000531307	0.00456039	FALSE	55	58	55	58	-0.302036
P29391	P29391	>sp|P29391|FRIL1_MOUSE Ferritin light chain 1 OS=Mus musculus (Mouse) OX=10090 GN=Ftl1 PE=1 SV=2	FTL1	6	5	-1.70598e-17	1	1	FALSE	28	30	28	30	-0.371845
Q9CQN7	Q9CQN7	>sp|Q9CQN7|RM41_MOUSE 39S ribosomal protein L41, mitochondrial OS=Mus musculus (Mouse) OX=10090 GN=Mrpl41 PE=1 SV=1	MRPL41	4	2	0.0703122	0.14653	0.392843	FALSE	19	15	19	15	1.05475
Q3U4S0	Q3U4S0	>tr|Q3U4S0|Q3U4S0_MOUSE Pantothenate kinase 2 OS=Mus musculus (Mouse) OX=10090 GN=Pank2 PE=1 SV=1	PANK2	1	1	-0.063	0.222599	0.533119	FALSE	4	5	4	5	-0.947607
Q9CY28	Q9CY28	>sp|Q9CY28|GTPB8_MOUSE GTP-binding protein 8 OS=Mus musculus (Mouse) OX=10090 GN=Gtpbp8 PE=2 SV=1	GTPBP8	2	2	0.226709	0.0254452	0.103601	FALSE	10	10	10	10	-0.0450912
P52019	P52019	>sp|P52019|ERG1_MOUSE Squalene monooxygenase OS=Mus musculus (Mouse) OX=10090 GN=Sqle PE=2 SV=1	SQLE	10	10	1.06806e-16	1	1	FALSE	49	49	49	49	-0.0439596
Q9CXJ4	Q9CXJ4	>sp|Q9CXJ4|MITOS_MOUSE Mitochondrial potassium channel ATP-binding subunit OS=Mus musculus (Mouse) OX=10090 GN=Abcb8 PE=1 SV=1	ABCB8	10	10	0.105688	0.00198575	0.0133705	FALSE	50	50	50	50	-0.0442122
Q60753	Q60753	>sp|Q60753|CTF1_MOUSE Cardiotrophin-1 OS=Mus musculus (Mouse) OX=10090 GN=Ctf1 PE=2 SV=1	CTF1	1	1	-0.124301	0.0273656	0.109722	FALSE	4	5	4	5	-0.947666
Q3UI43	Q3UI43	>sp|Q3UI43|BABA1_MOUSE BRISC and BRCA1-A complex member 1 OS=Mus musculus (Mouse) OX=10090 GN=Babam1 PE=1 SV=1	BABAM1	3	3	0	1	1	FALSE	13	14	13	14	-0.385863
Q91ZB7	Q91ZB7	>sp|Q91ZB7|MRGRE_MOUSE Mas-related G-protein coupled receptor member E OS=Mus musculus (Mouse) OX=10090 GN=Mrgpre PE=2 SV=1	MRGPRE	1	1	-1.25972e-17	1	1	FALSE	5	5	5	5	-0.046026
P49443	P49443	>sp|P49443|PPM1A_MOUSE Protein phosphatase 1A OS=Mus musculus (Mouse) OX=10090 GN=Ppm1a PE=1 SV=1	PPM1A	11	11	0	1	1	FALSE	55	54	55	54	0.0442899
Q80XU8	Q80XU8	>sp|Q80XU8|LRFN4_MOUSE Leucine-rich repeat and fibronectin type-III domain-containing protein 4 OS=Mus musculus (Mouse) OX=10090 GN=Lrfn4 PE=1 SV=1	LRFN4	8	6	0.133382	5.70521e-05	0.000719952	FALSE	37	37	37	37	-0.0454408
P36993	P36993	>sp|P36993|PPM1B_MOUSE Protein phosphatase 1B OS=Mus musculus (Mouse) OX=10090 GN=Ppm1b PE=1 SV=1	PPM1B	7	7	-0.0843103	0.00259459	0.0167615	FALSE	34	34	34	34	-0.0451125
Q8C1M2	Q8C1M2	>sp|Q8C1M2|ZN428_MOUSE Zinc finger protein 428 OS=Mus musculus (Mouse) OX=10090 GN=Znf428 PE=1 SV=1	ZNF428	1	1	0.30702	0.00187775	0.012801	FALSE	5	5	5	5	-0.046026
Q8C025	Q8C025	>sp|Q8C025|CHPT1_MOUSE Cholinephosphotransferase 1 OS=Mus musculus (Mouse) OX=10090 GN=Chpt1 PE=1 SV=1	CHPT1	1	1	-0.138272	0.0161958	0.0724015	FALSE	5	5	5	5	-0.046026
Q80SY5	Q80SY5	>sp|Q80SY5|PR38B_MOUSE Pre-mRNA-splicing factor 38B OS=Mus musculus (Mouse) OX=10090 GN=Prpf38b PE=1 SV=1	PRPF38B	3	3	0.0200615	0.423609	0.859395	FALSE	15	15	15	15	-0.0447409
Q9CZU6	Q9CZU6	>sp|Q9CZU6|CISY_MOUSE Citrate synthase, mitochondrial OS=Mus musculus (Mouse) OX=10090 GN=Cs PE=1 SV=1	CS	13	13	0.218351	5.29144e-06	9.69503e-05	FALSE	65	65	65	65	-0.0441573
O88986	O88986	>sp|O88986|KBL_MOUSE 2-amino-3-ketobutyrate coenzyme A ligase, mitochondrial OS=Mus musculus (Mouse) OX=10090 GN=Gcat PE=1 SV=2	GCAT	5	3	0	1	1	FALSE	21	22	21	22	-0.262315
E9Q4Z2	E9Q4Z2	>sp|E9Q4Z2|ACACB_MOUSE Acetyl-CoA carboxylase 2 OS=Mus musculus (Mouse) OX=10090 GN=Acacb PE=1 SV=1	ACACB	2	2	-0.583216	5.05556e-10	2.96412e-08	TRUE	10	10	10	10	-0.0450912
Q07235	Q07235	>sp|Q07235|GDN_MOUSE Glia-derived nexin OS=Mus musculus (Mouse) OX=10090 GN=Serpine2 PE=1 SV=2	SERPINE2	16	16	-0.113221	0.00220018	0.0145951	FALSE	79	78	79	78	0.0180355
Q8VIM9	Q8VIM9	>sp|Q8VIM9|IRGQ_MOUSE Immunity-related GTPase family Q protein OS=Mus musculus (Mouse) OX=10090 GN=Irgq PE=1 SV=1	IRGQ	8	8	0.0198074	0.278645	0.632094	FALSE	39	39	39	39	-0.0439707
F8VPP8	F8VPP8	>tr|F8VPP8|F8VPP8_MOUSE Zinc finger CCCH type-containing 7B OS=Mus musculus (Mouse) OX=10090 GN=Zc3h7b PE=1 SV=1	ZC3H7B	6	6	0	1	1	FALSE	29	28	29	28	0.123316
Q64378	Q64378	>sp|Q64378|FKBP5_MOUSE Peptidyl-prolyl cis-trans isomerase FKBP5 OS=Mus musculus (Mouse) OX=10090 GN=Fkbp5 PE=1 SV=1	FKBP5	10	10	-0.0816161	0.000595139	0.00497931	FALSE	50	49	50	49	0.0530297
Q3TAQ9	Q3TAQ9	>tr|Q3TAQ9|Q3TAQ9_MOUSE WD_REPEATS_REGION domain-containing protein OS=Mus musculus (Mouse) OX=10090 GN=Wdr36 PE=1 SV=1	WDR36	6	6	-3.70221e-18	1	1	FALSE	27	28	27	28	-0.22137
Q64331	Q64331	>sp|Q64331|MYO6_MOUSE Unconventional myosin-VI OS=Mus musculus (Mouse) OX=10090 GN=Myo6 PE=1 SV=1	MYO6	22	21	-0.0973651	8.48808e-05	0.00101405	FALSE	107	107	107	107	-0.0431735
Q9JII6	Q9JII6	>sp|Q9JII6|AK1A1_MOUSE Aldo-keto reductase family 1 member A1 OS=Mus musculus (Mouse) OX=10090 GN=Akr1a1 PE=1 SV=3	AKR1A1	15	13	0.0275576	0.160521	0.420733	FALSE	71	69	71	69	0.0960327
P70261	P70261	>sp|P70261|PALD_MOUSE Paladin OS=Mus musculus (Mouse) OX=10090 GN=Pald1 PE=1 SV=1	PALD1	9	6	-0.0862558	0.151996	0.403944	FALSE	36	37	36	37	-0.177768
Q60605;Q8CI43	Q60605;Q8CI43	>sp|Q60605|MYL6_MOUSE Myosin light polypeptide 6 OS=Mus musculus (Mouse) OX=10090 GN=Myl6 PE=1 SV=3;>sp|Q8CI43|MYL6B_MOUSE Myosin light chain 6B OS=Mus musculus (Mouse) OX=10090 GN=Myl6b PE=1 SV=1	MYL6;MYL6B	1	1	0	1	1	FALSE	5	5	5	5	-0.046026
Q8BW56	Q8BW56	>sp|Q8BW56|GTDC1_MOUSE Glycosyltransferase-like domain-containing protein 1 OS=Mus musculus (Mouse) OX=10090 GN=Gtdc1 PE=2 SV=2	GTDC1	3	3	0.073722	0.0171298	0.0754264	FALSE	14	15	14	15	-0.363609
Q8VDS8	Q8VDS8	>sp|Q8VDS8|STX18_MOUSE Syntaxin-18 OS=Mus musculus (Mouse) OX=10090 GN=Stx18 PE=1 SV=2	STX18	9	6	-0.0217752	0.232726	0.550711	FALSE	42	40	42	40	0.188594
Q80X68	Q80X68	>tr|Q80X68|Q80X68_MOUSE Citrate synthase OS=Mus musculus (Mouse) OX=10090 GN=Csl PE=1 SV=1	CSL	1	1	0	1	1	FALSE	5	5	5	5	-0.046026
O35684	O35684	>sp|O35684|NEUS_MOUSE Neuroserpin OS=Mus musculus (Mouse) OX=10090 GN=Serpini1 PE=1 SV=1	SERPINI1	4	4	-0.302478	2.24351e-10	1.47414e-08	TRUE	18	20	18	20	-0.538998
P58281	P58281	>sp|P58281|OPA1_MOUSE Dynamin-like 120 kDa protein, mitochondrial OS=Mus musculus (Mouse) OX=10090 GN=Opa1 PE=1 SV=1	OPA1	35	32	0.120747	0.00236065	0.0154977	FALSE	173	164	173	164	0.217867
Q9CQX0	Q9CQX0	>sp|Q9CQX0|OTUB2_MOUSE Ubiquitin thioesterase OTUB2 OS=Mus musculus (Mouse) OX=10090 GN=Otub2 PE=1 SV=1	OTUB2	3	2	0	1	1	FALSE	15	11	15	11	1.37745
Q80WG5	Q80WG5	>sp|Q80WG5|LRC8A_MOUSE Volume-regulated anion channel subunit LRRC8A OS=Mus musculus (Mouse) OX=10090 GN=Lrrc8a PE=1 SV=1	LRRC8A	13	11	-0.0148646	0.309991	0.678371	FALSE	64	59	64	59	0.352515
Q811D0	Q811D0	>sp|Q811D0|DLG1_MOUSE Disks large homolog 1 OS=Mus musculus (Mouse) OX=10090 GN=Dlg1 PE=1 SV=1	DLG1	16	16	-0.125653	0.000496754	0.00431237	FALSE	79	80	79	80	-0.10527
Q8K1C9	Q8K1C9	>sp|Q8K1C9|LRC41_MOUSE Leucine-rich repeat-containing protein 41 OS=Mus musculus (Mouse) OX=10090 GN=Lrrc41 PE=1 SV=3	LRRC41	1	1	0	1	1	FALSE	5	5	5	5	-0.046026
Q8K0C1	Q8K0C1	>sp|Q8K0C1|IPO13_MOUSE Importin-13 OS=Mus musculus (Mouse) OX=10090 GN=Ipo13 PE=1 SV=1	IPO13	5	4	2.44514e-17	1	1	FALSE	23	23	23	23	-0.0447949
Q61097	Q61097	>sp|Q61097|KSR1_MOUSE Kinase suppressor of Ras 1 OS=Mus musculus (Mouse) OX=10090 GN=Ksr1 PE=1 SV=1	KSR1	12	9	2.6485e-15	1	1	FALSE	49	55	49	55	-0.603769
Q8BP00	Q8BP00	>sp|Q8BP00|IQCB1_MOUSE IQ calmodulin-binding motif-containing protein 1 OS=Mus musculus (Mouse) OX=10090 GN=Iqcb1 PE=1 SV=2	IQCB1	6	5	-0.0634033	0.0225707	0.0937003	FALSE	27	27	27	27	-0.0456452
Q61205	Q61205	>sp|Q61205|PA1B3_MOUSE Platelet-activating factor acetylhydrolase IB subunit gamma OS=Mus musculus (Mouse) OX=10090 GN=Pafah1b3 PE=1 SV=1	PAFAH1B3	5	5	0.066202	0.0949984	0.285858	FALSE	25	24	25	24	0.149138
O54901	O54901	>sp|O54901|OX2G_MOUSE OX-2 membrane glycoprotein OS=Mus musculus (Mouse) OX=10090 GN=Cd200 PE=1 SV=1	CD200	7	7	-0.113241	0.0280701	0.112296	FALSE	34	35	34	35	-0.182991
P58404	P58404	>sp|P58404|STRN4_MOUSE Striatin-4 OS=Mus musculus (Mouse) OX=10090 GN=Strn4 PE=1 SV=2	STRN4	9	9	-0.0602715	0.0049088	0.02783	FALSE	44	45	44	45	-0.152431
P97823	P97823	>sp|P97823|LYPA1_MOUSE Acyl-protein thioesterase 1 OS=Mus musculus (Mouse) OX=10090 GN=Lypla1 PE=1 SV=1	LYPLA1	4	3	0.0522568	0.183042	0.461359	FALSE	18	17	18	17	0.223487
Q8R092	Q8R092	>sp|Q8R092|CA043_MOUSE Uncharacterized protein C1orf43 homolog OS=Mus musculus (Mouse) OX=10090 GN=MGI:1914027 PE=2 SV=1	MGI:1914027	3	3	1.50737e-19	1	1	FALSE	13	15	13	15	-0.706163
F8VQ70	F8VQ70	>tr|F8VQ70|F8VQ70_MOUSE U1-type domain-containing protein OS=Mus musculus (Mouse) OX=10090 GN=Scaper PE=1 SV=1	SCAPER	11	6	0.0820961	0.0408093	0.149975	FALSE	51	39	51	39	1.25013
Q9D8U8	Q9D8U8	>sp|Q9D8U8|SNX5_MOUSE Sorting nexin-5 OS=Mus musculus (Mouse) OX=10090 GN=Snx5 PE=1 SV=1	SNX5	13	12	-0.134005	2.17479e-06	4.61733e-05	FALSE	61	65	61	65	-0.352409
Q8K394	Q8K394	>sp|Q8K394|PLCL2_MOUSE Inactive phospholipase C-like protein 2 OS=Mus musculus (Mouse) OX=10090 GN=Plcl2 PE=1 SV=2	PLCL2	11	10	-3.48207e-18	1	1	FALSE	51	53	51	53	-0.230532
Q8CBW3	Q8CBW3	>sp|Q8CBW3|ABI1_MOUSE Abl interactor 1 OS=Mus musculus (Mouse) OX=10090 GN=Abi1 PE=1 SV=3	ABI1	8	8	-0.0673013	0.00776934	0.0400934	FALSE	40	40	40	40	-0.0442712
Q9CR62	Q9CR62	>sp|Q9CR62|M2OM_MOUSE Mitochondrial 2-oxoglutarate/malate carrier protein OS=Mus musculus (Mouse) OX=10090 GN=Slc25a11 PE=1 SV=3	SLC25A11	16	16	0.20296	1.81705e-09	9.35782e-08	FALSE	79	79	79	79	-0.0440796
Q45VK7	Q45VK7	>sp|Q45VK7|DYHC2_MOUSE Cytoplasmic dynein 2 heavy chain 1 OS=Mus musculus (Mouse) OX=10090 GN=Dync2h1 PE=1 SV=1	DYNC2H1	3	3	-0.0293401	0.295975	0.657319	FALSE	15	13	15	13	0.616865
Q03963	Q03963	>sp|Q03963|E2AK2_MOUSE Interferon-induced, double-stranded RNA-activated protein kinase OS=Mus musculus (Mouse) OX=10090 GN=Eif2ak2 PE=1 SV=2	EIF2AK2	6	6	0	1	1	FALSE	29	29	29	29	-0.0442514
Q8BTZ7	Q8BTZ7	>sp|Q8BTZ7|GMPPB_MOUSE Mannose-1-phosphate guanyltransferase beta OS=Mus musculus (Mouse) OX=10090 GN=Gmppb PE=1 SV=1	GMPPB	10	9	-0.0774866	0.00311062	0.0192757	FALSE	47	50	47	50	-0.343297
Q80TE7	Q80TE7	>sp|Q80TE7|LRRC7_MOUSE Leucine-rich repeat-containing protein 7 OS=Mus musculus (Mouse) OX=10090 GN=Lrrc7 PE=1 SV=2	LRRC7	14	12	-0.0690181	0.0167853	0.0743824	FALSE	63	65	63	65	-0.196762
Q9DAM5	Q9DAM5	>sp|Q9DAM5|TPC_MOUSE Mitochondrial thiamine pyrophosphate carrier OS=Mus musculus (Mouse) OX=10090 GN=Slc25a19 PE=1 SV=1	SLC25A19	3	2	1.04481e-17	1	1	FALSE	11	11	11	11	-0.0472913
Q8BJ71	Q8BJ71	>sp|Q8BJ71|NUP93_MOUSE Nuclear pore complex protein Nup93 OS=Mus musculus (Mouse) OX=10090 GN=Nup93 PE=1 SV=1	NUP93	17	14	-7.69094e-18	1	1	FALSE	77	78	77	78	-0.107087
Q8BHS6	Q8BHS6	>sp|Q8BHS6|ARMX3_MOUSE Armadillo repeat-containing X-linked protein 3 OS=Mus musculus (Mouse) OX=10090 GN=Armcx3 PE=1 SV=1	ARMCX3	6	6	-6.37283e-15	1	1	FALSE	30	30	30	30	-0.0443681
E9Q6E5	E9Q6E5	>tr|E9Q6E5|E9Q6E5_MOUSE RRM domain-containing protein OS=Mus musculus (Mouse) OX=10090 GN=Srsf11 PE=1 SV=1	SRSF11	5	3	1.02251e-18	1	1	FALSE	22	21	22	21	0.174242
Q80UW8	Q80UW8	>sp|Q80UW8|RPAB1_MOUSE DNA-directed RNA polymerases I, II, and III subunit RPABC1 OS=Mus musculus (Mouse) OX=10090 GN=Polr2e PE=1 SV=1	POLR2E	3	3	0.0378192	0.248221	0.579461	FALSE	15	15	15	15	-0.0447409
Q9Z1T1	Q9Z1T1	>sp|Q9Z1T1|AP3B1_MOUSE AP-3 complex subunit beta-1 OS=Mus musculus (Mouse) OX=10090 GN=Ap3b1 PE=1 SV=2	AP3B1	27	23	-0.124335	0.0104052	0.0509039	FALSE	125	129	125	129	-0.199248
Q9CYG7	Q9CYG7	>sp|Q9CYG7|TOM34_MOUSE Mitochondrial import receptor subunit TOM34 OS=Mus musculus (Mouse) OX=10090 GN=Tomm34 PE=1 SV=1	TOMM34	13	13	-0.0627541	0.0013059	0.00952494	FALSE	65	63	65	63	0.107434
Q3U0P5	Q3U0P5	>tr|Q3U0P5|Q3U0P5_MOUSE Ectonucleoside triphosphate diphosphohydrolase 6 OS=Mus musculus (Mouse) OX=10090 GN=Entpd6 PE=1 SV=1	ENTPD6	8	7	1.69507e-17	1	1	FALSE	39	36	39	36	0.341866
Q9CR67	Q9CR67	>sp|Q9CR67|TMM33_MOUSE Transmembrane protein 33 OS=Mus musculus (Mouse) OX=10090 GN=Tmem33 PE=1 SV=1	TMEM33	6	6	0.0210161	0.497303	0.969423	FALSE	29	30	29	30	-0.204992
Q8BRM2	Q8BRM2	>sp|Q8BRM2|GORAB_MOUSE RAB6-interacting golgin OS=Mus musculus (Mouse) OX=10090 GN=Gorab PE=1 SV=1	GORAB	1	1	0	1	1	FALSE	5	5	5	5	-0.046026
P40124	P40124	>sp|P40124|CAP1_MOUSE Adenylyl cyclase-associated protein 1 OS=Mus musculus (Mouse) OX=10090 GN=Cap1 PE=1 SV=4	CAP1	18	18	-0.0905455	5.19037e-08	1.76612e-06	FALSE	90	89	90	89	0.0101537
O08914	O08914	>sp|O08914|FAAH1_MOUSE Fatty-acid amide hydrolase 1 OS=Mus musculus (Mouse) OX=10090 GN=Faah PE=1 SV=1	FAAH	7	6	-0.230235	6.89673e-06	0.000120016	FALSE	33	35	33	35	-0.326633
Q9CYI4	Q9CYI4	>sp|Q9CYI4|LUC7L_MOUSE Putative RNA-binding protein Luc7-like 1 OS=Mus musculus (Mouse) OX=10090 GN=Luc7l PE=1 SV=2	LUC7L	2	1	0.143011	0.0344681	0.131292	FALSE	7	6	7	6	0.614706
Q8K2T1	Q8K2T1	>sp|Q8K2T1|NMRL1_MOUSE NmrA-like family domain-containing protein 1 OS=Mus musculus (Mouse) OX=10090 GN=Nmral1 PE=1 SV=1	NMRAL1	5	5	8.94627e-17	1	1	FALSE	25	25	25	25	-0.0444446
P59672	P59672	>sp|P59672|ANS1A_MOUSE Ankyrin repeat and SAM domain-containing protein 1A OS=Mus musculus (Mouse) OX=10090 GN=Anks1a PE=1 SV=3	ANKS1A	7	5	-0.0271959	0.190195	0.47463	FALSE	29	27	29	27	0.292739
Q9Z0Y1	Q9Z0Y1	>sp|Q9Z0Y1|DCTN3_MOUSE Dynactin subunit 3 OS=Mus musculus (Mouse) OX=10090 GN=Dctn3 PE=1 SV=2	DCTN3	4	4	0.000646769	0.877788	1	FALSE	20	20	20	20	-0.0445575
Q149L6	Q149L6	>sp|Q149L6|DJB14_MOUSE DnaJ homolog subfamily B member 14 OS=Mus musculus (Mouse) OX=10090 GN=Dnajb14 PE=2 SV=1	DNAJB14	4	4	0.166152	0.00950818	0.047336	FALSE	20	19	20	19	0.195046
E9PY16	E9PY16	>tr|E9PY16|E9PY16_MOUSE ArfGAP with dual PH domains 1 OS=Mus musculus (Mouse) OX=10090 GN=Adap1 PE=1 SV=1	ADAP1	15	14	-0.0166603	0.583359	1	FALSE	72	72	72	72	-0.0433702
Q8R361	Q8R361	>sp|Q8R361|RFIP5_MOUSE Rab11 family-interacting protein 5 OS=Mus musculus (Mouse) OX=10090 GN=Rab11fip5 PE=1 SV=2	RAB11FIP5	6	6	0	1	1	FALSE	30	30	30	30	-0.0443681
P58252	P58252	>sp|P58252|EF2_MOUSE Elongation factor 2 OS=Mus musculus (Mouse) OX=10090 GN=Eef2 PE=1 SV=2	EEF2	40	39	0.0620098	0.0937623	0.283032	FALSE	198	196	198	196	0.0058089
Q6PAM1	Q6PAM1	>sp|Q6PAM1|TXLNA_MOUSE Alpha-taxilin OS=Mus musculus (Mouse) OX=10090 GN=Txlna PE=1 SV=1	TXLNA	8	7	0.0975795	0.000649912	0.00533221	FALSE	37	35	37	35	0.223441
Q9D0R4	Q9D0R4	>sp|Q9D0R4|DDX56_MOUSE Probable ATP-dependent RNA helicase DDX56 OS=Mus musculus (Mouse) OX=10090 GN=Ddx56 PE=2 SV=1	DDX56	2	2	0.00434954	0.747464	1	FALSE	10	10	10	10	-0.0450912
Q8BHC9	Q8BHC9	>sp|Q8BHC9|FUT11_MOUSE Alpha-(1,3)-fucosyltransferase 11 OS=Mus musculus (Mouse) OX=10090 GN=Fut11 PE=1 SV=1	FUT11	5	4	2.56783e-17	1	1	FALSE	25	23	25	23	0.35205
P19137	P19137	>sp|P19137|LAMA1_MOUSE Laminin subunit alpha-1 OS=Mus musculus (Mouse) OX=10090 GN=Lama1 PE=1 SV=2	LAMA1	39	32	-8.10955e-17	1	1	FALSE	183	178	183	178	0.0914557
G3X9N3	G3X9N3	>tr|G3X9N3|G3X9N3_MOUSE PNMA-like 2 OS=Mus musculus (Mouse) OX=10090 GN=Pnmal2 PE=1 SV=1	PNMAL2	9	9	0.271764	2.97255e-06	5.99189e-05	FALSE	43	43	43	43	-0.0434716
P48036	P48036	>sp|P48036|ANXA5_MOUSE Annexin A5 OS=Mus musculus (Mouse) OX=10090 GN=Anxa5 PE=1 SV=1	ANXA5	17	16	-1.6756e-18	1	1	FALSE	85	83	85	83	0.0725015
O88384	O88384	>sp|O88384|VTI1B_MOUSE Vesicle transport through interaction with t-SNAREs homolog 1B OS=Mus musculus (Mouse) OX=10090 GN=Vti1b PE=1 SV=1	VTI1B	7	6	0	1	1	FALSE	35	32	35	32	0.38638
Q9R0G7	Q9R0G7	>sp|Q9R0G7|ZEB2_MOUSE Zinc finger E-box-binding homeobox 2 OS=Mus musculus (Mouse) OX=10090 GN=Zeb2 PE=1 SV=2	ZEB2	3	2	0.212369	0.000386372	0.00353109	FALSE	13	14	13	14	-0.387106
P17426;P17427	P17426;P17427	>sp|P17426|AP2A1_MOUSE AP-2 complex subunit alpha-1 OS=Mus musculus (Mouse) OX=10090 GN=Ap2a1 PE=1 SV=1;>sp|P17427|AP2A2_MOUSE AP-2 complex subunit alpha-2 OS=Mus musculus (Mouse) OX=10090 GN=Ap2a2 PE=1 SV=2	AP2A1;AP2A2	8	7	4.89166e-16	1	1	FALSE	35	36	35	36	-0.182222
Q3UKC1	Q3UKC1	>sp|Q3UKC1|TAXB1_MOUSE Tax1-binding protein 1 homolog OS=Mus musculus (Mouse) OX=10090 GN=Tax1bp1 PE=1 SV=2	TAX1BP1	7	6	0.0647073	0.0107877	0.052272	FALSE	35	32	35	32	0.384604
O35405	O35405	>sp|O35405|PLD3_MOUSE 5'-3' exonuclease PLD3 OS=Mus musculus (Mouse) OX=10090 GN=Pld3 PE=1 SV=1	PLD3	5	4	-0.101592	0.00310245	0.0192407	FALSE	21	23	21	23	-0.473548
Q99J47	Q99J47	>sp|Q99J47|DRS7B_MOUSE Dehydrogenase/reductase SDR family member 7B OS=Mus musculus (Mouse) OX=10090 GN=Dhrs7b PE=1 SV=1	DHRS7B	8	8	-0.120115	8.73306e-09	3.61758e-07	FALSE	40	40	40	40	-0.0442712
Q80TL4	Q80TL4	>sp|Q80TL4|PHF24_MOUSE PHD finger protein 24 OS=Mus musculus (Mouse) OX=10090 GN=Phf24 PE=1 SV=2	PHF24	10	10	0	1	1	FALSE	50	50	50	50	-0.0442122
Q8BNV1	Q8BNV1	>sp|Q8BNV1|TRM2A_MOUSE tRNA (uracil-5-)-methyltransferase homolog A OS=Mus musculus (Mouse) OX=10090 GN=Trmt2a PE=1 SV=1	TRMT2A	3	3	1.05139e-16	1	1	FALSE	14	15	14	15	-0.363609
O08848	O08848	>sp|O08848|RO60_MOUSE 60 kDa SS-A/Ro ribonucleoprotein OS=Mus musculus (Mouse) OX=10090 GN=RO60 PE=1 SV=1	RO60	10	8	-1.81004e-15	1	1	FALSE	44	47	44	47	-0.362629
P39053;Q8BZ98	P39053;Q8BZ98	>sp|P39053|DYN1_MOUSE Dynamin-1 OS=Mus musculus (Mouse) OX=10090 GN=Dnm1 PE=1 SV=2;>sp|Q8BZ98|DYN3_MOUSE Dynamin-3 OS=Mus musculus (Mouse) OX=10090 GN=Dnm3 PE=1 SV=1	DNM1;DNM3	5	5	6.95569e-19	1	1	FALSE	24	23	24	23	0.160387
Q8BVA4	Q8BVA4	>sp|Q8BVA4|LMOD1_MOUSE Leiomodin-1 OS=Mus musculus (Mouse) OX=10090 GN=Lmod1 PE=1 SV=1	LMOD1	1	1	0	1	1	FALSE	5	5	5	5	-0.046026
Q8BMA6	Q8BMA6	>sp|Q8BMA6|SRP68_MOUSE Signal recognition particle subunit SRP68 OS=Mus musculus (Mouse) OX=10090 GN=Srp68 PE=1 SV=2	SRP68	22	19	-0.037505	0.0487449	0.171399	FALSE	100	101	100	101	-0.0913404
Q8CGF7	Q8CGF7	>sp|Q8CGF7|TCRG1_MOUSE Transcription elongation regulator 1 OS=Mus musculus (Mouse) OX=10090 GN=Tcerg1 PE=1 SV=2	TCERG1	16	15	-1.76815e-16	1	1	FALSE	75	79	75	79	-0.298009
Q7TPH6	Q7TPH6	>sp|Q7TPH6|MYCB2_MOUSE E3 ubiquitin-protein ligase MYCBP2 OS=Mus musculus (Mouse) OX=10090 GN=Mycbp2 PE=1 SV=3	MYCBP2	15	15	-0.141725	1.15257e-10	8.52899e-09	FALSE	70	71	70	71	-0.115113
Q99KY4	Q99KY4	>sp|Q99KY4|GAK_MOUSE Cyclin-G-associated kinase OS=Mus musculus (Mouse) OX=10090 GN=Gak PE=1 SV=2	GAK	11	11	-0.054747	0.00457643	0.0263058	FALSE	54	55	54	55	-0.132886
O35633	O35633	>sp|O35633|VIAAT_MOUSE Vesicular inhibitory amino acid transporter OS=Mus musculus (Mouse) OX=10090 GN=Slc32a1 PE=1 SV=3	SLC32A1	8	8	0.175608	0.058163	0.195985	FALSE	40	40	40	40	-0.0442712
O35639	O35639	>sp|O35639|ANXA3_MOUSE Annexin A3 OS=Mus musculus (Mouse) OX=10090 GN=Anxa3 PE=1 SV=4	ANXA3	16	14	-2.38708e-17	1	1	FALSE	74	76	74	76	-0.173919
P47791	P47791	>sp|P47791|GSHR_MOUSE Glutathione reductase, mitochondrial OS=Mus musculus (Mouse) OX=10090 GN=Gsr PE=1 SV=3	GSR	6	5	-0.0700744	0.0527836	0.181633	FALSE	25	24	25	24	0.150505
Q01065	Q01065	>sp|Q01065|PDE1B_MOUSE Calcium/calmodulin-dependent 3',5'-cyclic nucleotide phosphodiesterase 1B OS=Mus musculus (Mouse) OX=10090 GN=Pde1b PE=1 SV=2	PDE1B	9	8	0.0401924	0.208456	0.509052	FALSE	44	43	44	43	0.0678898
P63038	P63038	>sp|P63038|CH60_MOUSE 60 kDa heat shock protein, mitochondrial OS=Mus musculus (Mouse) OX=10090 GN=Hspd1 PE=1 SV=1	HSPD1	30	30	0.0785017	0.0144886	0.0662461	FALSE	150	150	150	150	-0.0440522
Q9Z1Q2	Q9Z1Q2	>sp|Q9Z1Q2|ABHGA_MOUSE Phosphatidylserine lipase ABHD16A OS=Mus musculus (Mouse) OX=10090 GN=Abhd16a PE=1 SV=3	ABHD16A	12	11	-0.050866	0.00743218	0.0386676	FALSE	53	57	53	57	-0.398131
O70481	O70481	>sp|O70481|UBR1_MOUSE E3 ubiquitin-protein ligase UBR1 OS=Mus musculus (Mouse) OX=10090 GN=Ubr1 PE=1 SV=2	UBR1	12	11	0	1	1	FALSE	58	57	58	57	0.040629
Q8BP47	Q8BP47	>sp|Q8BP47|SYNC_MOUSE Asparagine--tRNA ligase, cytoplasmic OS=Mus musculus (Mouse) OX=10090 GN=NARS1 PE=1 SV=2	NARS1	22	22	-0.107024	2.6386e-05	0.000373818	FALSE	110	109	110	109	0.000889703
Q9QZE5	Q9QZE5	>sp|Q9QZE5|COPG1_MOUSE Coatomer subunit gamma-1 OS=Mus musculus (Mouse) OX=10090 GN=Copg1 PE=1 SV=1	COPG1	24	22	-5.81507e-16	1	1	FALSE	111	112	111	112	-0.0881437
Q9D0L7	Q9D0L7	>sp|Q9D0L7|ARM10_MOUSE Armadillo repeat-containing protein 10 OS=Mus musculus (Mouse) OX=10090 GN=Armc10 PE=1 SV=1	ARMC10	6	6	0.107723	4.07664e-05	0.00054417	FALSE	30	30	30	30	-0.0443681
Q921G7	Q921G7	>sp|Q921G7|ETFD_MOUSE Electron transfer flavoprotein-ubiquinone oxidoreductase, mitochondrial OS=Mus musculus (Mouse) OX=10090 GN=Etfdh PE=1 SV=1	ETFDH	15	13	-0.00042745	0.873137	1	FALSE	70	69	70	69	0.0264582
Q8C5H8	Q8C5H8	>sp|Q8C5H8|NAKD2_MOUSE NAD kinase 2, mitochondrial OS=Mus musculus (Mouse) OX=10090 GN=Nadk2 PE=1 SV=2	NADK2	12	12	9.28766e-17	1	1	FALSE	60	58	60	58	0.120642
Q8CI75	Q8CI75	>sp|Q8CI75|DI3L2_MOUSE DIS3-like exonuclease 2 OS=Mus musculus (Mouse) OX=10090 GN=Dis3l2 PE=1 SV=1	DIS3L2	8	8	-0.0130304	0.421655	0.857083	FALSE	40	40	40	40	-0.0442712
Q9D0F6	Q9D0F6	>sp|Q9D0F6|RFC5_MOUSE Replication factor C subunit 5 OS=Mus musculus (Mouse) OX=10090 GN=Rfc5 PE=1 SV=1	RFC5	8	4	-0.022217	0.321712	0.697608	FALSE	28	27	28	27	0.124948
Q7TMB8	Q7TMB8	>sp|Q7TMB8|CYFP1_MOUSE Cytoplasmic FMR1-interacting protein 1 OS=Mus musculus (Mouse) OX=10090 GN=Cyfip1 PE=1 SV=1	CYFIP1	18	16	-0.0965059	9.16796e-08	2.82908e-06	FALSE	87	85	87	85	0.0695452
Q99PV0	Q99PV0	>sp|Q99PV0|PRP8_MOUSE Pre-mRNA-processing-splicing factor 8 OS=Mus musculus (Mouse) OX=10090 GN=Prpf8 PE=1 SV=2	PRPF8	40	31	-0.507879	6.18155e-43	4.71158e-39	TRUE	171	190	171	190	-0.561425
Q9Z1Q9	Q9Z1Q9	>sp|Q9Z1Q9|SYVC_MOUSE Valine--tRNA ligase OS=Mus musculus (Mouse) OX=10090 GN=Vars PE=1 SV=1	VARS	33	31	-0.0671619	0.014374	0.0657882	FALSE	160	159	160	159	-0.0131009
Q3THK7	Q3THK7	>sp|Q3THK7|GUAA_MOUSE GMP synthase [glutamine-hydrolyzing] OS=Mus musculus (Mouse) OX=10090 GN=Gmps PE=1 SV=2	GMPS	22	19	0.0548627	0.000434123	0.00387457	FALSE	102	100	102	100	0.0525916
Q921L5	Q921L5	>sp|Q921L5|COG2_MOUSE Conserved oligomeric Golgi complex subunit 2 OS=Mus musculus (Mouse) OX=10090 GN=Cog2 PE=1 SV=2	COG2	8	6	-0.116032	5.91049e-07	1.45322e-05	FALSE	36	37	36	37	-0.176014
Q9EQJ0	Q9EQJ0	>sp|Q9EQJ0|TPC1_MOUSE Two pore calcium channel protein 1 OS=Mus musculus (Mouse) OX=10090 GN=Tpcn1 PE=1 SV=1	TPCN1	7	6	-0.0433662	0.0613825	0.204126	FALSE	33	34	33	34	-0.189247
P59325	P59325	>sp|P59325|IF5_MOUSE Eukaryotic translation initiation factor 5 OS=Mus musculus (Mouse) OX=10090 GN=Eif5 PE=1 SV=1	EIF5	14	13	-0.0914717	0.000149575	0.0016194	FALSE	66	64	66	64	0.106285
Q9DC29	Q9DC29	>sp|Q9DC29|ABCB6_MOUSE ATP-binding cassette sub-family B member 6, mitochondrial OS=Mus musculus (Mouse) OX=10090 GN=Abcb6 PE=1 SV=1	ABCB6	6	6	-5.07136e-18	1	1	FALSE	30	30	30	30	-0.0443681
Q8C729	Q8C729	>sp|Q8C729|F126B_MOUSE Protein FAM126B OS=Mus musculus (Mouse) OX=10090 GN=Fam126b PE=1 SV=1	FAM126B	5	4	-0.167616	0.00352426	0.0213699	FALSE	24	22	24	22	0.367295
P97496;Q6PDG5	P97496;Q6PDG5	>sp|P97496|SMRC1_MOUSE SWI/SNF complex subunit SMARCC1 OS=Mus musculus (Mouse) OX=10090 GN=Smarcc1 PE=1 SV=2;>sp|Q6PDG5|SMRC2_MOUSE SWI/SNF complex subunit SMARCC2 OS=Mus musculus (Mouse) OX=10090 GN=Smarcc2 PE=1 SV=2	SMARCC1;SMARCC2	10	8	0.0910268	0.000795996	0.00632647	FALSE	46	46	46	46	-0.0439969
Q8VEH2	Q8VEH2	>tr|Q8VEH2|Q8VEH2_MOUSE Matrin-type domain-containing protein OS=Mus musculus (Mouse) OX=10090 GN=Ciz1 PE=1 SV=1	CIZ1	1	1	0	1	1	FALSE	5	5	5	5	-0.046026
Q9DBJ1	Q9DBJ1	>sp|Q9DBJ1|PGAM1_MOUSE Phosphoglycerate mutase 1 OS=Mus musculus (Mouse) OX=10090 GN=Pgam1 PE=1 SV=3	PGAM1	11	11	6.60009e-18	1	1	FALSE	55	55	55	55	-0.0441907
Q6GU68	Q6GU68	>sp|Q6GU68|ISLR_MOUSE Immunoglobulin superfamily containing leucine-rich repeat protein OS=Mus musculus (Mouse) OX=10090 GN=Islr PE=1 SV=1	ISLR	6	5	-9.68719e-17	1	1	FALSE	27	29	27	29	-0.386715
P19157	P19157	>sp|P19157|GSTP1_MOUSE Glutathione S-transferase P 1 OS=Mus musculus (Mouse) OX=10090 GN=Gstp1 PE=1 SV=2	GSTP1	14	12	5.08127e-16	1	1	FALSE	67	65	67	65	0.102865
Q5SSW2	Q5SSW2	>sp|Q5SSW2|PSME4_MOUSE Proteasome activator complex subunit 4 OS=Mus musculus (Mouse) OX=10090 GN=Psme4 PE=1 SV=1	PSME4	18	18	-0.143931	1.82992e-15	4.22655e-13	FALSE	85	88	85	88	-0.213328
Q8BRH0	Q8BRH0	>sp|Q8BRH0|TMTC3_MOUSE Protein O-mannosyl-transferase TMTC3 OS=Mus musculus (Mouse) OX=10090 GN=Tmtc3 PE=1 SV=2	TMTC3	6	5	-6.78408e-19	1	1	FALSE	29	26	29	26	0.472679
Q5FWH2	Q5FWH2	>sp|Q5FWH2|UNKL_MOUSE Putative E3 ubiquitin-protein ligase UNKL OS=Mus musculus (Mouse) OX=10090 GN=Unkl PE=2 SV=2	UNKL	1	1	0	1	1	FALSE	4	5	4	5	-0.947666
Q3TEA8	Q3TEA8	>sp|Q3TEA8|HP1B3_MOUSE Heterochromatin protein 1-binding protein 3 OS=Mus musculus (Mouse) OX=10090 GN=Hp1bp3 PE=1 SV=1	HP1BP3	16	16	-9.86312e-18	1	1	FALSE	80	79	80	79	0.0172719
Q99K01	Q99K01	>sp|Q99K01|PDXD1_MOUSE Pyridoxal-dependent decarboxylase domain-containing protein 1 OS=Mus musculus (Mouse) OX=10090 GN=Pdxdc1 PE=1 SV=2	PDXDC1	21	20	2.1086e-16	1	1	FALSE	101	100	101	100	0.0046771
Q9JMK2	Q9JMK2	>sp|Q9JMK2|KC1E_MOUSE Casein kinase I isoform epsilon OS=Mus musculus (Mouse) OX=10090 GN=Csnk1e PE=1 SV=2	CSNK1E	4	4	0.258905	1.18047e-07	3.54233e-06	FALSE	20	20	20	20	-0.0445575
Q9DBE0	Q9DBE0	>sp|Q9DBE0|CSAD_MOUSE Cysteine sulfinic acid decarboxylase OS=Mus musculus (Mouse) OX=10090 GN=Csad PE=1 SV=1	CSAD	4	4	-0.153266	0.0270431	0.108714	FALSE	20	20	20	20	-0.0445575
Q8BHL5	Q8BHL5	>sp|Q8BHL5|ELMO2_MOUSE Engulfment and cell motility protein 2 OS=Mus musculus (Mouse) OX=10090 GN=Elmo2 PE=1 SV=1	ELMO2	14	12	-0.0478701	0.00627437	0.0339413	FALSE	60	61	60	61	-0.123162
Q8CE50	Q8CE50	>sp|Q8CE50|SNX30_MOUSE Sorting nexin-30 OS=Mus musculus (Mouse) OX=10090 GN=Snx30 PE=1 SV=1	SNX30	13	12	0	1	1	FALSE	63	63	63	63	-0.0429491
Q9QZF2	Q9QZF2	>sp|Q9QZF2|GPC1_MOUSE Glypican-1 OS=Mus musculus (Mouse) OX=10090 GN=Gpc1 PE=1 SV=1	GPC1	12	12	-0.0407792	0.159374	0.418158	FALSE	60	60	60	60	-0.0441726
P11438	P11438	>sp|P11438|LAMP1_MOUSE Lysosome-associated membrane glycoprotein 1 OS=Mus musculus (Mouse) OX=10090 GN=Lamp1 PE=1 SV=2	LAMP1	8	8	-0.0565629	0.285368	0.642183	FALSE	39	38	39	38	0.0804774
Q99KP6	Q99KP6	>sp|Q99KP6|PRP19_MOUSE Pre-mRNA-processing factor 19 OS=Mus musculus (Mouse) OX=10090 GN=Prpf19 PE=1 SV=1	PRPF19	7	7	0.063714	0.00997482	0.0493177	FALSE	35	35	35	35	-0.0443129
A2AG50	A2AG50	>sp|A2AG50|MA7D2_MOUSE MAP7 domain-containing protein 2 OS=Mus musculus (Mouse) OX=10090 GN=Map7d2 PE=1 SV=1	MAP7D2	11	10	-1.40733e-16	1	1	FALSE	52	51	52	51	0.050608
P0C872	P0C872	>sp|P0C872|JMJD7_MOUSE Bifunctional peptidase and (3S)-lysyl hydroxylase Jmjd7 OS=Mus musculus (Mouse) OX=10090 GN=Jmjd7 PE=1 SV=1	JMJD7	1	1	0	1	1	FALSE	4	5	4	5	-0.94439
Q7TT50	Q7TT50	>sp|Q7TT50|MRCKB_MOUSE Serine/threonine-protein kinase MRCK beta OS=Mus musculus (Mouse) OX=10090 GN=Cdc42bpb PE=1 SV=2	CDC42BPB	42	39	0.0159946	0.232014	0.54988	FALSE	200	197	200	197	0.0298038
Q8R3S6	Q8R3S6	>sp|Q8R3S6|EXOC1_MOUSE Exocyst complex component 1 OS=Mus musculus (Mouse) OX=10090 GN=Exoc1 PE=1 SV=4	EXOC1	16	14	-1.46766e-17	1	1	FALSE	70	72	70	72	-0.181783
O35691	O35691	>sp|O35691|PININ_MOUSE Pinin OS=Mus musculus (Mouse) OX=10090 GN=Pnn PE=1 SV=4	PNN	8	7	0.0291241	0.275915	0.62758	FALSE	37	37	37	37	-0.044922
Q91ZT5	Q91ZT5	>sp|Q91ZT5|FGD4_MOUSE FYVE, RhoGEF and PH domain-containing protein 4 OS=Mus musculus (Mouse) OX=10090 GN=Fgd4 PE=1 SV=1	FGD4	11	6	-2.13283e-19	1	1	FALSE	42	40	42	40	0.188093
P80317	P80317	>sp|P80317|TCPZ_MOUSE T-complex protein 1 subunit zeta OS=Mus musculus (Mouse) OX=10090 GN=Cct6a PE=1 SV=3	CCT6A	18	14	7.80899e-18	1	1	FALSE	81	80	81	80	0.0166683
Q8BX10	Q8BX10	>sp|Q8BX10|PGAM5_MOUSE Serine/threonine-protein phosphatase PGAM5, mitochondrial OS=Mus musculus (Mouse) OX=10090 GN=Pgam5 PE=1 SV=1	PGAM5	12	12	0.145651	0.0126873	0.0597297	FALSE	60	60	60	60	-0.0441726
Q3U319	Q3U319	>sp|Q3U319|BRE1B_MOUSE E3 ubiquitin-protein ligase BRE1B OS=Mus musculus (Mouse) OX=10090 GN=Rnf40 PE=1 SV=2	RNF40	10	9	2.38242e-17	1	1	FALSE	48	46	48	46	0.161251
Q9EPB5	Q9EPB5	>sp|Q9EPB5|SERHL_MOUSE Serine hydrolase-like protein OS=Mus musculus (Mouse) OX=10090 GN=Serhl PE=1 SV=1	SERHL	3	3	-0.0917746	0.0141786	0.0652198	FALSE	15	15	15	15	-0.0447409
Q9DBG3	Q9DBG3	>sp|Q9DBG3|AP2B1_MOUSE AP-2 complex subunit beta OS=Mus musculus (Mouse) OX=10090 GN=Ap2b1 PE=1 SV=1	AP2B1	25	23	0	1	1	FALSE	123	120	123	120	0.0771596
O88811	O88811	>sp|O88811|STAM2_MOUSE Signal transducing adapter molecule 2 OS=Mus musculus (Mouse) OX=10090 GN=Stam2 PE=1 SV=1	STAM2	6	6	-1.29171e-17	1	1	FALSE	30	29	30	29	0.118607
Q6PAR5	Q6PAR5	>sp|Q6PAR5|GAPD1_MOUSE GTPase-activating protein and VPS9 domain-containing protein 1 OS=Mus musculus (Mouse) OX=10090 GN=Gapvd1 PE=1 SV=2	GAPVD1	18	17	-0.196346	6.1944e-11	4.67463e-09	FALSE	87	89	87	89	-0.155951
P26040	P26040	>sp|P26040|EZRI_MOUSE Ezrin OS=Mus musculus (Mouse) OX=10090 GN=Ezr PE=1 SV=3	EZR	20	17	-0.115886	0.08054	0.251689	FALSE	96	91	96	91	0.218477
P42125	P42125	>sp|P42125|ECI1_MOUSE Enoyl-CoA delta isomerase 1, mitochondrial OS=Mus musculus (Mouse) OX=10090 GN=Eci1 PE=1 SV=2	ECI1	9	9	-0.0592574	0.0871063	0.266958	FALSE	45	45	45	45	-0.0442385
Q9Z160	Q9Z160	>sp|Q9Z160|COG1_MOUSE Conserved oligomeric Golgi complex subunit 1 OS=Mus musculus (Mouse) OX=10090 GN=Cog1 PE=1 SV=3	COG1	12	8	-0.0681536	0.00110704	0.00832248	FALSE	54	50	54	50	0.330415
Q9D8Y1	Q9D8Y1	>sp|Q9D8Y1|T126A_MOUSE Transmembrane protein 126A OS=Mus musculus (Mouse) OX=10090 GN=Tmem126a PE=1 SV=1	TMEM126A	6	4	0.215139	0.000149417	0.0016194	FALSE	25	24	25	24	0.150505
Q99LI8	Q99LI8	>sp|Q99LI8|HGS_MOUSE Hepatocyte growth factor-regulated tyrosine kinase substrate OS=Mus musculus (Mouse) OX=10090 GN=Hgs PE=1 SV=2	HGS	12	11	0.0106679	0.390956	0.810407	FALSE	58	58	58	58	-0.0438958
Q6P1G0	Q6P1G0	>sp|Q6P1G0|HEAT6_MOUSE HEAT repeat-containing protein 6 OS=Mus musculus (Mouse) OX=10090 GN=Heatr6 PE=1 SV=1	HEATR6	3	2	-0.0386972	0.152193	0.404328	FALSE	12	14	12	14	-0.752057
Q9EQK5	Q9EQK5	>sp|Q9EQK5|MVP_MOUSE Major vault protein OS=Mus musculus (Mouse) OX=10090 GN=Mvp PE=1 SV=4	MVP	12	9	-1.20596e-15	1	1	FALSE	54	49	54	49	0.425697
Q9D6W8	Q9D6W8	>sp|Q9D6W8|BORC6_MOUSE BLOC-1-related complex subunit 6 OS=Mus musculus (Mouse) OX=10090 GN=Borcs6 PE=1 SV=1	BORCS6	1	1	-1.23793e-19	1	1	FALSE	5	5	5	5	-0.046026
Q8VHR5	Q8VHR5	>sp|Q8VHR5|P66B_MOUSE Transcriptional repressor p66-beta OS=Mus musculus (Mouse) OX=10090 GN=Gatad2b PE=1 SV=1	GATAD2B	10	8	0.051917	0.0636225	0.210018	FALSE	47	46	47	46	0.0610024
Q9D3E6	Q9D3E6	>sp|Q9D3E6|STAG1_MOUSE Cohesin subunit SA-1 OS=Mus musculus (Mouse) OX=10090 GN=Stag1 PE=1 SV=3	STAG1	9	6	-8.19047e-21	1	1	FALSE	41	38	41	38	0.324687
Q8BJY1	Q8BJY1	>sp|Q8BJY1|PSMD5_MOUSE 26S proteasome non-ATPase regulatory subunit 5 OS=Mus musculus (Mouse) OX=10090 GN=Psmd5 PE=1 SV=4	PSMD5	11	11	-0.00672729	0.480116	0.943886	FALSE	55	55	55	55	-0.0441907
P50285	P50285	>sp|P50285|FMO1_MOUSE Dimethylaniline monooxygenase [N-oxide-forming] 1 OS=Mus musculus (Mouse) OX=10090 GN=Fmo1 PE=1 SV=1	FMO1	5	3	-0.00919276	0.71428	1	FALSE	17	23	17	23	-1.46701
Q8BTX9	Q8BTX9	>sp|Q8BTX9|HSDL1_MOUSE Inactive hydroxysteroid dehydrogenase-like protein 1 OS=Mus musculus (Mouse) OX=10090 GN=Hsdl1 PE=1 SV=1	HSDL1	8	7	0.232773	1.28677e-11	1.22597e-09	FALSE	36	37	36	37	-0.176526
P70704	P70704	>sp|P70704|AT8A1_MOUSE Phospholipid-transporting ATPase IA OS=Mus musculus (Mouse) OX=10090 GN=Atp8a1 PE=1 SV=2	ATP8A1	30	28	0	1	1	FALSE	142	143	142	143	-0.0781267
Q3UGP8	Q3UGP8	>sp|Q3UGP8|AG10B_MOUSE Putative Dol-P-Glc:Glc(2)Man(9)GlcNAc(2)-PP-Dol alpha-1,2-glucosyltransferase OS=Mus musculus (Mouse) OX=10090 GN=Alg10b PE=1 SV=1	ALG10B	4	4	1.51307e-19	1	1	FALSE	20	20	20	20	-0.0445575
Q9ES74	Q9ES74	>sp|Q9ES74|NEK7_MOUSE Serine/threonine-protein kinase Nek7 OS=Mus musculus (Mouse) OX=10090 GN=Nek7 PE=1 SV=1	NEK7	5	5	-0.0332006	0.226911	0.540812	FALSE	25	25	25	25	-0.0444446
Q9WV91	Q9WV91	>sp|Q9WV91|FPRP_MOUSE Prostaglandin F2 receptor negative regulator OS=Mus musculus (Mouse) OX=10090 GN=Ptgfrn PE=1 SV=2	PTGFRN	13	13	-0.0301674	0.447617	0.894295	FALSE	63	63	63	63	-0.0431917
Q8R3I3	Q8R3I3	>sp|Q8R3I3|COG6_MOUSE Conserved oligomeric Golgi complex subunit 6 OS=Mus musculus (Mouse) OX=10090 GN=Cog6 PE=1 SV=2	COG6	8	8	-0.0128578	0.503492	0.979418	FALSE	38	38	38	38	-0.045489
Q60963	Q60963	>sp|Q60963|PAFA_MOUSE Platelet-activating factor acetylhydrolase OS=Mus musculus (Mouse) OX=10090 GN=Pla2g7 PE=2 SV=2	PLA2G7	11	8	-0.216334	0.000226322	0.00228178	FALSE	48	47	48	47	0.0568723
Q921W0	Q921W0	>sp|Q921W0|CHM1A_MOUSE Charged multivesicular body protein 1a OS=Mus musculus (Mouse) OX=10090 GN=Chmp1a PE=1 SV=1	CHMP1A	4	4	-0.0147805	0.404197	0.831523	FALSE	20	20	20	20	-0.0445575
P50431	P50431	>sp|P50431|GLYC_MOUSE Serine hydroxymethyltransferase, cytosolic OS=Mus musculus (Mouse) OX=10090 GN=Shmt1 PE=1 SV=3	SHMT1	2	1	0.0786298	0.120143	0.339974	FALSE	8	8	8	8	-0.0440949
Q91VD9	Q91VD9	>sp|Q91VD9|NDUS1_MOUSE NADH-ubiquinone oxidoreductase 75 kDa subunit, mitochondrial OS=Mus musculus (Mouse) OX=10090 GN=Ndufs1 PE=1 SV=2	NDUFS1	26	24	0.239926	2.17356e-07	6.00249e-06	FALSE	125	121	125	121	0.115964
Q62178	Q62178	>sp|Q62178|SEM4A_MOUSE Semaphorin-4A OS=Mus musculus (Mouse) OX=10090 GN=Sema4a PE=1 SV=2	SEMA4A	2	1	-0.0915087	0.116607	0.331821	FALSE	9	8	9	8	0.472626
Q62443	Q62443	>sp|Q62443|NPTX1_MOUSE Neuronal pentraxin-1 OS=Mus musculus (Mouse) OX=10090 GN=Nptx1 PE=1 SV=1	NPTX1	7	7	-0.304206	0.00346703	0.0210407	FALSE	35	35	35	35	-0.0443129
Q91YI1	Q91YI1	>sp|Q91YI1|ATG13_MOUSE Autophagy-related protein 13 OS=Mus musculus (Mouse) OX=10090 GN=Atg13 PE=1 SV=2	ATG13	5	4	-0.0551859	0.0592619	0.198658	FALSE	20	24	20	24	-0.904265
Q8BGZ4	Q8BGZ4	>sp|Q8BGZ4|CDC23_MOUSE Cell division cycle protein 23 homolog OS=Mus musculus (Mouse) OX=10090 GN=Cdc23 PE=1 SV=2	CDC23	10	8	-6.55446e-17	1	1	FALSE	45	46	45	46	-0.151812
Q9D071	Q9D071	>sp|Q9D071|MMS19_MOUSE MMS19 nucleotide excision repair protein homolog OS=Mus musculus (Mouse) OX=10090 GN=Mms19 PE=1 SV=1	MMS19	17	16	7.22307e-18	1	1	FALSE	79	78	79	78	0.0178922
Q8R317	Q8R317	>sp|Q8R317|UBQL1_MOUSE Ubiquilin-1 OS=Mus musculus (Mouse) OX=10090 GN=Ubqln1 PE=1 SV=1	UBQLN1	8	7	6.54323e-19	1	1	FALSE	37	38	37	38	-0.171864
P25233	P25233	>sp|P25233|NECD_MOUSE Necdin OS=Mus musculus (Mouse) OX=10090 GN=Ndn PE=1 SV=1	NDN	5	4	0.0934946	0.058809	0.197725	FALSE	23	23	23	23	-0.0487644
Q924L1	Q924L1	>sp|Q924L1|LTMD1_MOUSE LETM1 domain-containing protein 1 OS=Mus musculus (Mouse) OX=10090 GN=Letmd1 PE=1 SV=1	LETMD1	8	8	0.0520911	0.0752451	0.238568	FALSE	40	38	40	38	0.202104
P97872	P97872	>sp|P97872|FMO5_MOUSE Dimethylaniline monooxygenase [N-oxide-forming] 5 OS=Mus musculus (Mouse) OX=10090 GN=Fmo5 PE=1 SV=4	FMO5	2	2	0	1	1	FALSE	10	8	10	8	0.947591
Q9CWK8;Q9WV80	Q9CWK8;Q9WV80	>sp|Q9CWK8|SNX2_MOUSE Sorting nexin-2 OS=Mus musculus (Mouse) OX=10090 GN=Snx2 PE=1 SV=2;>sp|Q9WV80|SNX1_MOUSE Sorting nexin-1 OS=Mus musculus (Mouse) OX=10090 GN=Snx1 PE=1 SV=1	SNX2;SNX1	2	2	-0.0280416	0.285874	0.642834	FALSE	10	10	10	10	-0.0450912
Q91VI7	Q91VI7	>sp|Q91VI7|RINI_MOUSE Ribonuclease inhibitor OS=Mus musculus (Mouse) OX=10090 GN=Rnh1 PE=1 SV=1	RNH1	9	7	-0.116647	0.018438	0.0799398	FALSE	41	39	41	39	0.197258
Q68FE6	Q68FE6	>sp|Q68FE6|RIPR1_MOUSE Rho family-interacting cell polarization regulator 1 OS=Mus musculus (Mouse) OX=10090 GN=Ripor1 PE=1 SV=2	RIPOR1	13	12	0.0457886	0.0414669	0.151733	FALSE	59	59	59	59	-0.0442291
Q8K4Q8	Q8K4Q8	>sp|Q8K4Q8|COL12_MOUSE Collectin-12 OS=Mus musculus (Mouse) OX=10090 GN=Colec12 PE=1 SV=1	COLEC12	4	4	-1.00128e-16	1	1	FALSE	19	18	19	18	0.20825
Q9JHW4	Q9JHW4	>sp|Q9JHW4|SELB_MOUSE Selenocysteine-specific elongation factor OS=Mus musculus (Mouse) OX=10090 GN=Eefsec PE=1 SV=2	EEFSEC	10	9	-0.0802564	0.00178033	0.012247	FALSE	45	47	45	47	-0.253422
Q9WUE3	Q9WUE3	>sp|Q9WUE3|C56D2_MOUSE Cytochrome b561 domain-containing protein 2 OS=Mus musculus (Mouse) OX=10090 GN=Cyb561d2 PE=1 SV=1	CYB561D2	1	1	0	1	1	FALSE	5	5	5	5	-0.046026
Q8K221	Q8K221	>sp|Q8K221|ARFP2_MOUSE Arfaptin-2 OS=Mus musculus (Mouse) OX=10090 GN=Arfip2 PE=1 SV=2	ARFIP2	8	8	-5.29775e-16	1	1	FALSE	40	40	40	40	-0.0442712
Q9EQ06	Q9EQ06	>sp|Q9EQ06|DHB11_MOUSE Estradiol 17-beta-dehydrogenase 11 OS=Mus musculus (Mouse) OX=10090 GN=Hsd17b11 PE=1 SV=1	HSD17B11	7	6	0	1	1	FALSE	33	33	33	33	-0.0457442
Q69ZF7	Q69ZF7	>sp|Q69ZF7|CNNM4_MOUSE Metal transporter CNNM4 OS=Mus musculus (Mouse) OX=10090 GN=Cnnm4 PE=1 SV=2	CNNM4	4	2	0	1	1	FALSE	15	18	15	18	-0.896608
P81122	P81122	>sp|P81122|IRS2_MOUSE Insulin receptor substrate 2 OS=Mus musculus (Mouse) OX=10090 GN=Irs2 PE=1 SV=2	IRS2	6	6	-0.127724	1.97515e-06	4.28075e-05	FALSE	30	29	30	29	0.118607
Q91YR9	Q91YR9	>sp|Q91YR9|PTGR1_MOUSE Prostaglandin reductase 1 OS=Mus musculus (Mouse) OX=10090 GN=Ptgr1 PE=1 SV=2	PTGR1	3	3	0.000122146	0.962116	1	FALSE	15	15	15	15	-0.0447409
P10107	P10107	>sp|P10107|ANXA1_MOUSE Annexin A1 OS=Mus musculus (Mouse) OX=10090 GN=Anxa1 PE=1 SV=2	ANXA1	11	9	1.42028e-18	1	1	FALSE	52	48	52	48	0.34284
Q8R3Y8	Q8R3Y8	>sp|Q8R3Y8|I2BP1_MOUSE Interferon regulatory factor 2-binding protein 1 OS=Mus musculus (Mouse) OX=10090 GN=Irf2bp1 PE=1 SV=2	IRF2BP1	3	3	2.33e-19	1	1	FALSE	15	14	15	14	0.273844
Q3U7R1	Q3U7R1	>sp|Q3U7R1|ESYT1_MOUSE Extended synaptotagmin-1 OS=Mus musculus (Mouse) OX=10090 GN=Esyt1 PE=1 SV=2	ESYT1	9	8	0	1	1	FALSE	41	43	41	43	-0.277944
Q91W69	Q91W69	>sp|Q91W69|EPN3_MOUSE Epsin-3 OS=Mus musculus (Mouse) OX=10090 GN=Epn3 PE=1 SV=1	EPN3	1	1	0	1	1	FALSE	5	5	5	5	-0.046026
P70398	P70398	>sp|P70398|USP9X_MOUSE Probable ubiquitin carboxyl-terminal hydrolase FAF-X OS=Mus musculus (Mouse) OX=10090 GN=Usp9x PE=1 SV=2	USP9X	51	40	-0.219042	6.89229e-08	2.25464e-06	FALSE	227	233	227	233	-0.172905
Q6ZQ73	Q6ZQ73	>sp|Q6ZQ73|CAND2_MOUSE Cullin-associated NEDD8-dissociated protein 2 OS=Mus musculus (Mouse) OX=10090 GN=Cand2 PE=1 SV=2	CAND2	15	13	-1.94946e-17	1	1	FALSE	68	70	68	70	-0.187224
Q8R3Q0	Q8R3Q0	>sp|Q8R3Q0|SARAF_MOUSE Store-operated calcium entry-associated regulatory factor OS=Mus musculus (Mouse) OX=10090 GN=Saraf PE=1 SV=2	SARAF	3	3	-0.0934864	0.00849898	0.043215	FALSE	15	15	15	15	-0.0447409
Q3TJD7	Q3TJD7	>sp|Q3TJD7|PDLI7_MOUSE PDZ and LIM domain protein 7 OS=Mus musculus (Mouse) OX=10090 GN=Pdlim7 PE=1 SV=1	PDLIM7	7	7	-1.08843e-16	1	1	FALSE	35	35	35	35	-0.0443129
Q8K0G5	Q8K0G5	>sp|Q8K0G5|EIPR1_MOUSE EARP and GARP complex-interacting protein 1 OS=Mus musculus (Mouse) OX=10090 GN=Eipr1 PE=1 SV=2	EIPR1	5	5	1.05251e-19	1	1	FALSE	25	25	25	25	-0.0444446
Q8R3B1	Q8R3B1	>sp|Q8R3B1|PLCD1_MOUSE 1-phosphatidylinositol 4,5-bisphosphate phosphodiesterase delta-1 OS=Mus musculus (Mouse) OX=10090 GN=Plcd1 PE=1 SV=2	PLCD1	14	13	3.89761e-17	1	1	FALSE	67	68	67	68	-0.116677
O35682	O35682	>sp|O35682|MYADM_MOUSE Myeloid-associated differentiation marker OS=Mus musculus (Mouse) OX=10090 GN=Myadm PE=1 SV=2	MYADM	3	3	-7.56227e-19	1	1	FALSE	15	15	15	15	-0.0447409
Q9JI75	Q9JI75	>sp|Q9JI75|NQO2_MOUSE Ribosyldihydronicotinamide dehydrogenase [quinone] OS=Mus musculus (Mouse) OX=10090 GN=Nqo2 PE=1 SV=3	NQO2	2	2	-0.000753763	0.917716	1	FALSE	9	10	9	10	-0.516079
P26041	P26041	>sp|P26041|MOES_MOUSE Moesin OS=Mus musculus (Mouse) OX=10090 GN=Msn PE=1 SV=3	MSN	22	19	-1.50876e-16	1	1	FALSE	105	102	105	102	0.0967846
Q9D4H8	Q9D4H8	>sp|Q9D4H8|CUL2_MOUSE Cullin-2 OS=Mus musculus (Mouse) OX=10090 GN=Cul2 PE=1 SV=2	CUL2	26	24	0.0128067	0.407378	0.83581	FALSE	126	123	126	123	0.0742081
Q04519	Q04519	>sp|Q04519|ASM_MOUSE Sphingomyelin phosphodiesterase OS=Mus musculus (Mouse) OX=10090 GN=Smpd1 PE=1 SV=2	SMPD1	7	6	-5.17979e-17	1	1	FALSE	32	30	32	30	0.263218
Q6P069	Q6P069	>sp|Q6P069|SORCN_MOUSE Sorcin OS=Mus musculus (Mouse) OX=10090 GN=Sri PE=1 SV=1	SRI	7	7	1.63795e-19	1	1	FALSE	34	34	34	34	-0.0444138
Q8C1A5	Q8C1A5	>sp|Q8C1A5|THOP1_MOUSE Thimet oligopeptidase OS=Mus musculus (Mouse) OX=10090 GN=Thop1 PE=1 SV=1	THOP1	21	21	0.0917674	4.45034e-16	1.25631e-13	FALSE	105	104	105	104	0.00269076
Q99KE1	Q99KE1	>sp|Q99KE1|MAOM_MOUSE NAD-dependent malic enzyme, mitochondrial OS=Mus musculus (Mouse) OX=10090 GN=Me2 PE=1 SV=1	ME2	13	12	0.0515886	0.0965202	0.288317	FALSE	62	60	62	60	0.113632
P68372;Q922F4;Q9D6F9;Q9ERD7	P68372;Q922F4;Q9D6F9;Q9ERD7	>sp|P68372|TBB4B_MOUSE Tubulin beta-4B chain OS=Mus musculus (Mouse) OX=10090 GN=Tubb4b PE=1 SV=1;>sp|Q922F4|TBB6_MOUSE Tubulin beta-6 chain OS=Mus musculus (Mouse) OX=10090 GN=Tubb6 PE=1 SV=1;>sp|Q9D6F9|TBB4A_MOUSE Tubulin beta-4A chain OS=Mus musculus (Mouse) OX=10090 GN=Tubb4a PE=1 SV=3;>sp|Q9ERD7|TBB3_MOUSE Tubulin beta-3 chain OS=Mus musculus (Mouse) OX=10090 GN=Tubb3 PE=1 SV=1	TUBB4B;TUBB6;TUBB4A;TUBB3	2	2	0.148107	0.000579485	0.00488588	FALSE	10	10	10	10	-0.0450912
Q7TMM9;Q9CWF2	Q7TMM9;Q9CWF2	>sp|Q7TMM9|TBB2A_MOUSE Tubulin beta-2A chain OS=Mus musculus (Mouse) OX=10090 GN=Tubb2a PE=1 SV=1;>sp|Q9CWF2|TBB2B_MOUSE Tubulin beta-2B chain OS=Mus musculus (Mouse) OX=10090 GN=Tubb2b PE=1 SV=1	TUBB2A;TUBB2B	3	3	3.21752e-14	0.999999	1	FALSE	15	15	15	15	-0.0447409
P99024	P99024	>sp|P99024|TBB5_MOUSE Tubulin beta-5 chain OS=Mus musculus (Mouse) OX=10090 GN=Tubb5 PE=1 SV=1	TUBB5	6	6	1.10596e-18	1	1	FALSE	29	30	29	30	-0.205789
P70345	P70345	>sp|P70345|B2CL2_MOUSE Bcl-2-like protein 2 OS=Mus musculus (Mouse) OX=10090 GN=Bcl2l2 PE=1 SV=1	BCL2L2	3	2	0.151816	0.00565288	0.0311993	FALSE	15	13	15	13	0.617372
Q9JJI6	Q9JJI6	>sp|Q9JJI6|PIGO_MOUSE GPI ethanolamine phosphate transferase 3 OS=Mus musculus (Mouse) OX=10090 GN=Pigo PE=1 SV=2	PIGO	5	4	-0.0280681	0.250199	0.582829	FALSE	21	21	21	21	-0.0472694
Q9WUA2	Q9WUA2	>sp|Q9WUA2|SYFB_MOUSE Phenylalanine--tRNA ligase beta subunit OS=Mus musculus (Mouse) OX=10090 GN=Farsb PE=1 SV=2	FARSB	19	17	0.118966	8.13702e-14	1.40955e-11	FALSE	92	89	92	89	0.117385
Q8K1H1	Q8K1H1	>sp|Q8K1H1|TDRD7_MOUSE Tudor domain-containing protein 7 OS=Mus musculus (Mouse) OX=10090 GN=Tdrd7 PE=1 SV=1	TDRD7	3	3	-1.21092e-16	1	1	FALSE	14	15	14	15	-0.363609
P14131	P14131	>sp|P14131|RS16_MOUSE 40S ribosomal protein S16 OS=Mus musculus (Mouse) OX=10090 GN=Rps16 PE=1 SV=4	RPS16	6	6	0.0244696	0.346244	0.739236	FALSE	30	30	30	30	-0.0443681
Q9QXT0	Q9QXT0	>sp|Q9QXT0|CNPY2_MOUSE Protein canopy homolog 2 OS=Mus musculus (Mouse) OX=10090 GN=Cnpy2 PE=1 SV=1	CNPY2	7	7	-0.114899	0.00999389	0.0493351	FALSE	35	35	35	35	-0.0443129
Q91XD7	Q91XD7	>sp|Q91XD7|CREL1_MOUSE Protein disulfide isomerase Creld1 OS=Mus musculus (Mouse) OX=10090 GN=Creld1 PE=1 SV=1	CRELD1	2	1	-0.176657	0.00303586	0.0189142	FALSE	8	10	8	10	-1.03502
Q80VI1	Q80VI1	>sp|Q80VI1|TRI56_MOUSE E3 ubiquitin-protein ligase TRIM56 OS=Mus musculus (Mouse) OX=10090 GN=Trim56 PE=1 SV=1	TRIM56	4	3	-0.0121532	0.651172	1	FALSE	18	17	18	17	0.224424
Q9D6S7	Q9D6S7	>sp|Q9D6S7|RRFM_MOUSE Ribosome-recycling factor, mitochondrial OS=Mus musculus (Mouse) OX=10090 GN=Mrrf PE=1 SV=1	MRRF	6	6	9.06674e-15	1	1	FALSE	30	29	30	29	0.116907
Q9JK81	Q9JK81	>sp|Q9JK81|MYG1_MOUSE UPF0160 protein MYG1, mitochondrial OS=Mus musculus (Mouse) OX=10090 GN=Myg1 PE=1 SV=1	MYG1	12	10	-1.18591e-15	1	1	FALSE	55	56	55	56	-0.133979
P11103	P11103	>sp|P11103|PARP1_MOUSE Poly [ADP-ribose] polymerase 1 OS=Mus musculus (Mouse) OX=10090 GN=Parp1 PE=1 SV=3	PARP1	18	18	6.38701e-17	1	1	FALSE	89	86	89	86	0.123933
Q3ZT31	Q3ZT31	>sp|Q3ZT31|SNX25_MOUSE Sorting nexin-25 OS=Mus musculus (Mouse) OX=10090 GN=Snx25 PE=1 SV=3	SNX25	7	5	-2.08394e-20	1	1	FALSE	28	28	28	28	-0.0435827
Q91W34	Q91W34	>sp|Q91W34|RUS1_MOUSE RUS1 family protein C16orf58 homolog OS=Mus musculus (Mouse) OX=10090 GN=MGI:2384572 PE=1 SV=1	MGI:2384572	2	2	5.40576e-19	1	1	FALSE	10	10	10	10	-0.0450912
Q9ESJ0	Q9ESJ0	>sp|Q9ESJ0|XPO4_MOUSE Exportin-4 OS=Mus musculus (Mouse) OX=10090 GN=Xpo4 PE=1 SV=2	XPO4	8	6	2.69815e-18	1	1	FALSE	35	34	35	34	0.0928943
Q91UZ5	Q91UZ5	>sp|Q91UZ5|IMPA2_MOUSE Inositol monophosphatase 2 OS=Mus musculus (Mouse) OX=10090 GN=Impa2 PE=1 SV=1	IMPA2	2	2	-0.0396134	0.184792	0.465153	FALSE	10	10	10	10	-0.0450912
Q8BFY9;Q99LG2	Q8BFY9;Q99LG2	>sp|Q8BFY9|TNPO1_MOUSE Transportin-1 OS=Mus musculus (Mouse) OX=10090 GN=Tnpo1 PE=1 SV=2;>sp|Q99LG2|TNPO2_MOUSE Transportin-2 OS=Mus musculus (Mouse) OX=10090 GN=Tnpo2 PE=1 SV=1	TNPO1;TNPO2	3	3	-0.0867668	0.00625096	0.0338387	FALSE	15	15	15	15	-0.0447409
P37040	P37040	>sp|P37040|NCPR_MOUSE NADPH--cytochrome P450 reductase OS=Mus musculus (Mouse) OX=10090 GN=Por PE=1 SV=2	POR	20	18	-0.106072	0.000787545	0.00626583	FALSE	96	91	96	91	0.217374
Q7TQF2	Q7TQF2	>sp|Q7TQF2|FBX10_MOUSE F-box only protein 10 OS=Mus musculus (Mouse) OX=10090 GN=Fbxo10 PE=1 SV=2	FBXO10	6	5	-0.145634	0.0002664	0.00259655	FALSE	28	27	28	27	0.131424
Q8BKV1	Q8BKV1	>sp|Q8BKV1|GPC2_MOUSE Glypican-2 OS=Mus musculus (Mouse) OX=10090 GN=Gpc2 PE=2 SV=1	GPC2	7	4	0.162306	0.0685999	0.222402	FALSE	28	24	28	24	0.688228
Q80ZM5	Q80ZM5	>tr|Q80ZM5|Q80ZM5_MOUSE H15 domain-containing protein OS=Mus musculus (Mouse) OX=10090 GN=H1f10 PE=1 SV=1	H1F10	3	3	-1.12108e-17	1	1	FALSE	15	14	15	14	0.27272
Q8CG72	Q8CG72	>sp|Q8CG72|ARHL2_MOUSE ADP-ribose glycohydrolase ARH3 OS=Mus musculus (Mouse) OX=10090 GN=Adprhl2 PE=1 SV=1	ADPRHL2	5	5	3.14828e-17	1	1	FALSE	25	25	25	25	-0.0444446
Q9JLV5	Q9JLV5	>sp|Q9JLV5|CUL3_MOUSE Cullin-3 OS=Mus musculus (Mouse) OX=10090 GN=Cul3 PE=1 SV=1	CUL3	29	28	-0.00411447	0.60348	1	FALSE	142	140	142	140	0.0259511
Q3U1J4	Q3U1J4	>sp|Q3U1J4|DDB1_MOUSE DNA damage-binding protein 1 OS=Mus musculus (Mouse) OX=10090 GN=Ddb1 PE=1 SV=2	DDB1	32	32	0.00244639	0.765826	1	FALSE	158	160	158	160	-0.106025
Q3ULD5	Q3ULD5	>sp|Q3ULD5|MCCB_MOUSE Methylcrotonoyl-CoA carboxylase beta chain, mitochondrial OS=Mus musculus (Mouse) OX=10090 GN=Mccc2 PE=1 SV=1	MCCC2	17	17	5.10686e-17	1	1	FALSE	85	84	85	84	0.0140085
Q99M71	Q99M71	>sp|Q99M71|EPDR1_MOUSE Mammalian ependymin-related protein 1 OS=Mus musculus (Mouse) OX=10090 GN=Epdr1 PE=1 SV=1	EPDR1	7	7	-0.101984	0.0440751	0.158762	FALSE	35	35	35	35	-0.0443129
O35286	O35286	>sp|O35286|DHX15_MOUSE Pre-mRNA-splicing factor ATP-dependent RNA helicase DHX15 OS=Mus musculus (Mouse) OX=10090 GN=Dhx15 PE=1 SV=2	DHX15	22	19	0.0641281	0.00862207	0.0437533	FALSE	103	103	103	103	-0.0444311
A2ACJ2	A2ACJ2	>sp|A2ACJ2|FP100_MOUSE Fanconi anemia core complex-associated protein 100 OS=Mus musculus (Mouse) OX=10090 GN=Faap100 PE=2 SV=1	FAAP100	3	2	0	1	1	FALSE	15	13	15	13	0.617372
E9Q3M9	E9Q3M9	>tr|E9Q3M9|E9Q3M9_MOUSE DUF4592 domain-containing protein OS=Mus musculus (Mouse) OX=10090 GN=2010300C02Rik PE=1 SV=1	2010300C02RIK	11	7	-0.137262	0.0170045	0.075005	FALSE	47	51	47	51	-0.439259
Q61548	Q61548	>sp|Q61548|AP180_MOUSE Clathrin coat assembly protein AP180 OS=Mus musculus (Mouse) OX=10090 GN=Snap91 PE=1 SV=1	SNAP91	18	16	3.2625e-16	1	1	FALSE	85	87	85	87	-0.158123
Q2WF71	Q2WF71	>sp|Q2WF71|LRFN1_MOUSE Leucine-rich repeat and fibronectin type III domain-containing protein 1 OS=Mus musculus (Mouse) OX=10090 GN=Lrfn1 PE=1 SV=1	LRFN1	10	10	0.0634674	0.128493	0.357002	FALSE	49	48	49	48	0.0558698
Q6R0H7	Q6R0H7	>sp|Q6R0H7|GNAS1_MOUSE Guanine nucleotide-binding protein G(s) subunit alpha isoforms XLas OS=Mus musculus (Mouse) OX=10090 GN=Gnas PE=1 SV=1	GNAS	12	11	-0.104761	0.00631495	0.0340882	FALSE	58	57	58	57	0.0406334
Q3V3N7	Q3V3N7	>sp|Q3V3N7|BBS1_MOUSE Bardet-Biedl syndrome 1 protein homolog OS=Mus musculus (Mouse) OX=10090 GN=Bbs1 PE=1 SV=1	BBS1	4	3	6.89031e-20	1	1	FALSE	17	16	17	16	0.239968
Q9R0L6	Q9R0L6	>sp|Q9R0L6|PCM1_MOUSE Pericentriolar material 1 protein OS=Mus musculus (Mouse) OX=10090 GN=Pcm1 PE=1 SV=2	PCM1	5	4	-7.24533e-19	1	1	FALSE	24	22	24	22	0.368745
Q9JHU2	Q9JHU2	>sp|Q9JHU2|PALMD_MOUSE Palmdelphin OS=Mus musculus (Mouse) OX=10090 GN=Palmd PE=1 SV=1	PALMD	5	5	0.0268203	0.515922	0.998568	FALSE	25	25	25	25	-0.0444446
Q62419	Q62419	>sp|Q62419|SH3G1_MOUSE Endophilin-A2 OS=Mus musculus (Mouse) OX=10090 GN=Sh3gl1 PE=1 SV=1	SH3GL1	8	8	-6.79065e-19	1	1	FALSE	40	37	40	37	0.331903
Q62420	Q62420	>sp|Q62420|SH3G2_MOUSE Endophilin-A1 OS=Mus musculus (Mouse) OX=10090 GN=Sh3gl2 PE=1 SV=2	SH3GL2	12	11	-5.21204e-18	1	1	FALSE	56	54	56	54	0.132847
Q3UVX5	Q3UVX5	>sp|Q3UVX5|GRM5_MOUSE Metabotropic glutamate receptor 5 OS=Mus musculus (Mouse) OX=10090 GN=Grm5 PE=1 SV=2	GRM5	11	10	-0.177674	1.00934e-05	0.000166881	FALSE	51	52	51	52	-0.137402
Q920E5	Q920E5	>sp|Q920E5|FPPS_MOUSE Farnesyl pyrophosphate synthase OS=Mus musculus (Mouse) OX=10090 GN=Fdps PE=1 SV=1	FDPS	10	9	-0.198334	0.00060317	0.00501895	FALSE	50	48	50	48	0.154066
P08551	P08551	>sp|P08551|NFL_MOUSE Neurofilament light polypeptide OS=Mus musculus (Mouse) OX=10090 GN=Nefl PE=1 SV=5	NEFL	17	16	-0.280597	0.0254586	0.103601	FALSE	80	79	80	79	0.0167932
Q60770	Q60770	>sp|Q60770|STXB3_MOUSE Syntaxin-binding protein 3 OS=Mus musculus (Mouse) OX=10090 GN=Stxbp3 PE=1 SV=1	STXBP3	11	10	-0.106417	0.0225837	0.0937035	FALSE	52	52	52	52	-0.0455621
F8VPZ3	F8VPZ3	>tr|F8VPZ3|F8VPZ3_MOUSE Ubiquitin-specific peptidase 32 OS=Mus musculus (Mouse) OX=10090 GN=Usp32 PE=1 SV=1	USP32	10	7	-6.36015e-17	1	1	FALSE	39	39	39	39	-0.0435836
O88643;Q8CIN4	O88643;Q8CIN4	>sp|O88643|PAK1_MOUSE Serine/threonine-protein kinase PAK 1 OS=Mus musculus (Mouse) OX=10090 GN=Pak1 PE=1 SV=1;>sp|Q8CIN4|PAK2_MOUSE Serine/threonine-protein kinase PAK 2 OS=Mus musculus (Mouse) OX=10090 GN=Pak2 PE=1 SV=1	PAK1;PAK2	1	1	0.0097425	0.713458	1	FALSE	5	5	5	5	-0.046026
Q61036	Q61036	>sp|Q61036|PAK3_MOUSE Serine/threonine-protein kinase PAK 3 OS=Mus musculus (Mouse) OX=10090 GN=Pak3 PE=1 SV=2	PAK3	8	8	0.0101302	0.542745	1	FALSE	40	40	40	40	-0.0442712
Q9CW79	Q9CW79	>sp|Q9CW79|GOGA1_MOUSE Golgin subfamily A member 1 OS=Mus musculus (Mouse) OX=10090 GN=Golga1 PE=1 SV=2	GOLGA1	9	6	0.0527485	0.0414091	0.151667	FALSE	40	36	40	36	0.46187
Q91ZU6	Q91ZU6	>sp|Q91ZU6|DYST_MOUSE Dystonin OS=Mus musculus (Mouse) OX=10090 GN=Dst PE=1 SV=2	DST	11	7	-0.238813	1.81398e-06	3.97304e-05	FALSE	40	47	40	47	-0.826184
Q8C0C7	Q8C0C7	>sp|Q8C0C7|SYFA_MOUSE Phenylalanine--tRNA ligase alpha subunit OS=Mus musculus (Mouse) OX=10090 GN=Farsa PE=1 SV=1	FARSA	14	14	0.0668554	0.00169205	0.0117671	FALSE	70	69	70	69	0.025618
Q8VEM8	Q8VEM8	>sp|Q8VEM8|MPCP_MOUSE Phosphate carrier protein, mitochondrial OS=Mus musculus (Mouse) OX=10090 GN=Slc25a3 PE=1 SV=1	SLC25A3	16	12	0.175944	9.88899e-05	0.00114899	FALSE	68	70	68	70	-0.185009
Q62422	Q62422	>sp|Q62422|OSTF1_MOUSE Osteoclast-stimulating factor 1 OS=Mus musculus (Mouse) OX=10090 GN=Ostf1 PE=1 SV=2	OSTF1	3	3	-7.03454e-16	1	1	FALSE	15	15	15	15	-0.0447409
Q8BK72	Q8BK72	>sp|Q8BK72|RT27_MOUSE 28S ribosomal protein S27, mitochondrial OS=Mus musculus (Mouse) OX=10090 GN=Mrps27 PE=1 SV=2	MRPS27	10	9	0.216848	2.94668e-08	1.05941e-06	FALSE	46	45	46	45	0.0634144
Q8CHE4	Q8CHE4	>sp|Q8CHE4|PHLP1_MOUSE PH domain leucine-rich repeat-containing protein phosphatase 1 OS=Mus musculus (Mouse) OX=10090 GN=Phlpp1 PE=1 SV=2	PHLPP1	3	3	-0.0261717	0.421682	0.857083	FALSE	14	14	14	14	-0.0471824
Q60838	Q60838	>sp|Q60838|DVL2_MOUSE Segment polarity protein dishevelled homolog DVL-2 OS=Mus musculus (Mouse) OX=10090 GN=Dvl2 PE=1 SV=2	DVL2	1	1	-0.0702442	0.263618	0.605447	FALSE	5	5	5	5	-0.046026
Q91WT9	Q91WT9	>sp|Q91WT9|CBS_MOUSE Cystathionine beta-synthase OS=Mus musculus (Mouse) OX=10090 GN=Cbs PE=1 SV=3	CBS	6	4	-4.57584e-19	1	1	FALSE	23	24	23	24	-0.247185
Q5SQX6	Q5SQX6	>sp|Q5SQX6|CYFP2_MOUSE Cytoplasmic FMR1-interacting protein 2 OS=Mus musculus (Mouse) OX=10090 GN=Cyfip2 PE=1 SV=2	CYFIP2	31	27	-4.32606e-16	1	1	FALSE	145	147	145	147	-0.111618
Q61062	Q61062	>sp|Q61062|DVL3_MOUSE Segment polarity protein dishevelled homolog DVL-3 OS=Mus musculus (Mouse) OX=10090 GN=Dvl3 PE=1 SV=2	DVL3	3	2	2.84852e-17	1	1	FALSE	12	13	12	13	-0.412703
P12382	P12382	>sp|P12382|PFKAL_MOUSE ATP-dependent 6-phosphofructokinase, liver type OS=Mus musculus (Mouse) OX=10090 GN=Pfkl PE=1 SV=4	PFKL	17	17	0.0793126	0.000714874	0.0057904	FALSE	85	84	85	84	0.0140085
Q9D1C8	Q9D1C8	>sp|Q9D1C8|VPS28_MOUSE Vacuolar protein sorting-associated protein 28 homolog OS=Mus musculus (Mouse) OX=10090 GN=Vps28 PE=1 SV=1	VPS28	6	5	0.104258	0.000110779	0.00126591	FALSE	27	26	27	26	0.134061
Q9R0N7	Q9R0N7	>sp|Q9R0N7|SYT7_MOUSE Synaptotagmin-7 OS=Mus musculus (Mouse) OX=10090 GN=Syt7 PE=1 SV=1	SYT7	6	6	0.154183	0.000878524	0.00684674	FALSE	30	30	30	30	-0.0443681
O35681	O35681	>sp|O35681|SYT3_MOUSE Synaptotagmin-3 OS=Mus musculus (Mouse) OX=10090 GN=Syt3 PE=1 SV=2	SYT3	4	4	0.181187	0.00304529	0.0189479	FALSE	20	20	20	20	-0.0445575
O88543	O88543	>sp|O88543|CSN3_MOUSE COP9 signalosome complex subunit 3 OS=Mus musculus (Mouse) OX=10090 GN=Cops3 PE=1 SV=3	COPS3	8	7	0	1	1	FALSE	37	38	37	38	-0.173195
P18872	P18872	>sp|P18872|GNAO_MOUSE Guanine nucleotide-binding protein G(o) subunit alpha OS=Mus musculus (Mouse) OX=10090 GN=Gnao1 PE=1 SV=3	GNAO1	20	18	0.0372605	0.304741	0.671127	FALSE	94	93	94	93	0.0089122
Q99PL5	Q99PL5	>sp|Q99PL5|RRBP1_MOUSE Ribosome-binding protein 1 OS=Mus musculus (Mouse) OX=10090 GN=Rrbp1 PE=1 SV=2	RRBP1	32	30	0	1	1	FALSE	156	157	156	157	-0.0755736
Q9ESP1	Q9ESP1	>sp|Q9ESP1|SDF2L_MOUSE Stromal cell-derived factor 2-like protein 1 OS=Mus musculus (Mouse) OX=10090 GN=Sdf2l1 PE=1 SV=2	SDF2L1	1	1	-0.114848	0.126052	0.351802	FALSE	5	5	5	5	-0.046026
Q64435	Q64435	>sp|Q64435|UD16_MOUSE UDP-glucuronosyltransferase 1-6 OS=Mus musculus (Mouse) OX=10090 GN=Ugt1a6 PE=1 SV=1	UGT1A6	12	11	0.105957	0.0830784	0.258248	FALSE	60	57	60	57	0.20371
Q91VH6	Q91VH6	>sp|Q91VH6|MEMO1_MOUSE Protein MEMO1 OS=Mus musculus (Mouse) OX=10090 GN=Memo1 PE=1 SV=1	MEMO1	6	6	-0.0580586	0.0961054	0.287599	FALSE	29	28	29	28	0.122109
O88685	O88685	>sp|O88685|PRS6A_MOUSE 26S proteasome regulatory subunit 6A OS=Mus musculus (Mouse) OX=10090 GN=Psmc3 PE=1 SV=2	PSMC3	26	24	-0.040899	0.030193	0.118949	FALSE	124	123	124	123	-0.00399748
Q9WUA3	Q9WUA3	>sp|Q9WUA3|PFKAP_MOUSE ATP-dependent 6-phosphofructokinase, platelet type OS=Mus musculus (Mouse) OX=10090 GN=Pfkp PE=1 SV=1	PFKP	24	23	-0.183237	5.04425e-05	0.000647261	FALSE	118	117	118	117	-0.00234238
Q91XM9	Q91XM9	>sp|Q91XM9|DLG2_MOUSE Disks large homolog 2 OS=Mus musculus (Mouse) OX=10090 GN=Dlg2 PE=1 SV=2	DLG2	22	20	0.14261	0.00368822	0.0221351	FALSE	104	101	104	101	0.0992529
Q64442	Q64442	>sp|Q64442|DHSO_MOUSE Sorbitol dehydrogenase OS=Mus musculus (Mouse) OX=10090 GN=Sord PE=1 SV=3	SORD	7	7	-1.09508e-17	1	1	FALSE	35	35	35	35	-0.0443129
Q99LS3	Q99LS3	>sp|Q99LS3|SERB_MOUSE Phosphoserine phosphatase OS=Mus musculus (Mouse) OX=10090 GN=Psph PE=1 SV=1	PSPH	6	6	-0.291643	6.47386e-06	0.000114222	FALSE	30	30	30	30	-0.0443681
Q8BPN8	Q8BPN8	>sp|Q8BPN8|DMXL2_MOUSE DmX-like protein 2 OS=Mus musculus (Mouse) OX=10090 GN=Dmxl2 PE=1 SV=3	DMXL2	59	44	-0.31372	6.99276e-13	8.88313e-11	TRUE	254	281	254	281	-0.54115
P10853;P10854;Q64475;Q64478;Q64524;Q64525;Q6ZWY9;Q8CGP0;Q8CGP1;Q8CGP2;Q9D2U9	P10853;P10854;Q64475;Q64478;Q64524;Q64525;Q6ZWY9;Q8CGP0;Q8CGP1;Q8CGP2;Q9D2U9	>sp|P10853|H2B1F_MOUSE Histone H2B type 1-F/J/L OS=Mus musculus (Mouse) OX=10090 GN=H2bc13 PE=1 SV=2;>sp|P10854|H2B1M_MOUSE Histone H2B type 1-M OS=Mus musculus (Mouse) OX=10090 GN=H2bc14 PE=1 SV=2;>sp|Q64475|H2B1B_MOUSE Histone H2B type 1-B OS=Mus musculus (Mouse) OX=10090 GN=Hist1h2bb PE=1 SV=3;>sp|Q64478|H2B1H_MOUSE Histone H2B type 1-H OS=Mus musculus (Mouse) OX=10090 GN=Hist1h2bh PE=1 SV=3;>…	H2BC13;H2BC14;HIST1H2BB;HIST1H2BH;HIST2H2BE;HIST2H2BB;H2BC8;HIST3H2BB;H2BC12;HIST1H2BP;HIST3H2BA	5	5	0.0513356	0.250392	0.5831	FALSE	25	25	25	25	-0.0444446
P08752	P08752	>sp|P08752|GNAI2_MOUSE Guanine nucleotide-binding protein G(i) subunit alpha-2 OS=Mus musculus (Mouse) OX=10090 GN=Gnai2 PE=1 SV=5	GNAI2	8	8	0.110297	0.00190328	0.0129294	FALSE	39	40	39	40	-0.166233
A2BE28	A2BE28	>sp|A2BE28|LAS1L_MOUSE Ribosomal biogenesis protein LAS1L OS=Mus musculus (Mouse) OX=10090 GN=Las1l PE=1 SV=1	LAS1L	10	9	0.0256983	0.191316	0.476073	FALSE	47	49	47	49	-0.246873
Q8C3F2	Q8C3F2	>sp|Q8C3F2|F120C_MOUSE Constitutive coactivator of PPAR-gamma-like protein 2 OS=Mus musculus (Mouse) OX=10090 GN=Fam120c PE=1 SV=3	FAM120C	19	17	-0.0863993	7.30746e-08	2.36006e-06	FALSE	87	90	87	90	-0.210533
Q9CQX6	Q9CQX6	>tr|Q9CQX6|Q9CQX6_MOUSE N-acetyltransferase domain-containing protein OS=Mus musculus (Mouse) OX=10090 GN=Gm16286 PE=1 SV=1	GM16286	1	1	0	1	1	FALSE	5	4	5	4	0.854505
Q9WV84	Q9WV84	>sp|Q9WV84|NDKM_MOUSE Nucleoside diphosphate kinase, mitochondrial OS=Mus musculus (Mouse) OX=10090 GN=Nme4 PE=1 SV=1	NME4	1	1	0	1	1	FALSE	5	5	5	5	-0.046026
Q9Z1M7	Q9Z1M7	>sp|Q9Z1M7|LARG1_MOUSE LARGE xylosyl- and glucuronyltransferase 1 OS=Mus musculus (Mouse) OX=10090 GN=Large1 PE=1 SV=1	LARGE1	6	5	-1.23322e-17	1	1	FALSE	27	27	27	27	-0.0436842
P83940	P83940	>sp|P83940|ELOC_MOUSE Elongin-C OS=Mus musculus (Mouse) OX=10090 GN=Eloc PE=1 SV=1	ELOC	4	3	0.114277	0.01732	0.0761386	FALSE	19	17	19	17	0.471038
Q05909	Q05909	>sp|Q05909|PTPRG_MOUSE Receptor-type tyrosine-protein phosphatase gamma OS=Mus musculus (Mouse) OX=10090 GN=Ptprg PE=1 SV=1	PTPRG	13	10	-0.445739	5.23588e-10	3.0464e-08	TRUE	57	62	57	62	-0.451314
Q8R173	Q8R173	>sp|Q8R173|ZDHC3_MOUSE Palmitoyltransferase ZDHHC3 OS=Mus musculus (Mouse) OX=10090 GN=Zdhhc3 PE=1 SV=1	ZDHHC3	2	2	0	1	1	FALSE	10	10	10	10	-0.0450912
Q8CH09	Q8CH09	>sp|Q8CH09|SUGP2_MOUSE SURP and G-patch domain-containing protein 2 OS=Mus musculus (Mouse) OX=10090 GN=Sugp2 PE=1 SV=2	SUGP2	18	14	0.210248	6.45523e-17	2.23644e-14	FALSE	88	75	88	75	0.735173
P24547	P24547	>sp|P24547|IMDH2_MOUSE Inosine-5'-monophosphate dehydrogenase 2 OS=Mus musculus (Mouse) OX=10090 GN=Impdh2 PE=1 SV=2	IMPDH2	14	11	-3.12402e-20	1	1	FALSE	63	62	63	62	0.0339788
Q8BJ42	Q8BJ42	>sp|Q8BJ42|DLGP2_MOUSE Disks large-associated protein 2 OS=Mus musculus (Mouse) OX=10090 GN=Dlgap2 PE=1 SV=2	DLGAP2	4	3	-0.175043	0.000126655	0.00142595	FALSE	17	19	17	19	-0.563531
Q8BMG7	Q8BMG7	>sp|Q8BMG7|RBGPR_MOUSE Rab3 GTPase-activating protein non-catalytic subunit OS=Mus musculus (Mouse) OX=10090 GN=Rab3gap2 PE=1 SV=2	RAB3GAP2	19	17	-0.125206	2.96119e-10	1.88085e-08	FALSE	89	90	89	90	-0.0993321
Q3UIL6	Q3UIL6	>sp|Q3UIL6|PKHA7_MOUSE Pleckstrin homology domain-containing family A member 7 OS=Mus musculus (Mouse) OX=10090 GN=Plekha7 PE=1 SV=2	PLEKHA7	10	8	-0.20166	0.00384223	0.022969	FALSE	41	45	41	45	-0.49148
Q9QY76	Q9QY76	>sp|Q9QY76|VAPB_MOUSE Vesicle-associated membrane protein-associated protein B OS=Mus musculus (Mouse) OX=10090 GN=Vapb PE=1 SV=3	VAPB	6	5	-3.14199e-14	0.999999	1	FALSE	28	28	28	28	-0.0420594
P80318	P80318	>sp|P80318|TCPG_MOUSE T-complex protein 1 subunit gamma OS=Mus musculus (Mouse) OX=10090 GN=Cct3 PE=1 SV=1	CCT3	24	23	0.0312355	0.0843718	0.260357	FALSE	118	118	118	118	-0.0436462
Q80VP1	Q80VP1	>sp|Q80VP1|EPN1_MOUSE Epsin-1 OS=Mus musculus (Mouse) OX=10090 GN=Epn1 PE=1 SV=3	EPN1	9	9	2.14143e-17	1	1	FALSE	44	45	44	45	-0.152788
Q91YR5	Q91YR5	>sp|Q91YR5|EFNMT_MOUSE eEF1A lysine and N-terminal methyltransferase OS=Mus musculus (Mouse) OX=10090 GN=EEF1AKNMT PE=1 SV=1	EEF1AKNMT	6	4	6.25595e-16	1	1	FALSE	29	24	29	24	0.858371
Q6WKZ8	Q6WKZ8	>sp|Q6WKZ8|UBR2_MOUSE E3 ubiquitin-protein ligase UBR2 OS=Mus musculus (Mouse) OX=10090 GN=Ubr2 PE=1 SV=2	UBR2	6	6	-0.0470909	0.0681241	0.221512	FALSE	26	28	26	28	-0.396463
Q91WS0	Q91WS0	>sp|Q91WS0|CISD1_MOUSE CDGSH iron-sulfur domain-containing protein 1 OS=Mus musculus (Mouse) OX=10090 GN=Cisd1 PE=1 SV=1	CISD1	6	5	0.384615	2.97943e-06	5.99189e-05	TRUE	28	30	28	30	-0.373233
Q9D1M4	Q9D1M4	>sp|Q9D1M4|MCA3_MOUSE Eukaryotic translation elongation factor 1 epsilon-1 OS=Mus musculus (Mouse) OX=10090 GN=Eef1e1 PE=1 SV=1	EEF1E1	7	7	-1.2919e-19	1	1	FALSE	35	34	35	34	0.0942419
Q9CQJ8	Q9CQJ8	>sp|Q9CQJ8|NDUB9_MOUSE NADH dehydrogenase [ubiquinone] 1 beta subcomplex subunit 9 OS=Mus musculus (Mouse) OX=10090 GN=Ndufb9 PE=1 SV=3	NDUFB9	4	4	0.201196	0.000104807	0.0012122	FALSE	20	19	20	19	0.196624
Q9R1Z8	Q9R1Z8	>sp|Q9R1Z8|VINEX_MOUSE Vinexin OS=Mus musculus (Mouse) OX=10090 GN=Sorbs3 PE=1 SV=1	SORBS3	9	7	-0.0182197	0.672872	1	FALSE	41	39	41	39	0.195537
O70250;Q9DBJ1	O70250;Q9DBJ1	>sp|O70250|PGAM2_MOUSE Phosphoglycerate mutase 2 OS=Mus musculus (Mouse) OX=10090 GN=Pgam2 PE=1 SV=3;>sp|Q9DBJ1|PGAM1_MOUSE Phosphoglycerate mutase 1 OS=Mus musculus (Mouse) OX=10090 GN=Pgam1 PE=1 SV=3	PGAM2;PGAM1	3	3	0.0205601	0.434156	0.874046	FALSE	15	15	15	15	-0.0447409
Q9DCT5	Q9DCT5	>sp|Q9DCT5|SDF2_MOUSE Stromal cell-derived factor 2 OS=Mus musculus (Mouse) OX=10090 GN=Sdf2 PE=1 SV=1	SDF2	4	4	-9.79692e-15	1	1	FALSE	20	20	20	20	-0.0445575
A0A1L1SSC7	A0A1L1SSC7	>tr|A0A1L1SSC7|A0A1L1SSC7_MOUSE TPR_REGION domain-containing protein OS=Mus musculus (Mouse) OX=10090 GN=Ttc13 PE=1 SV=1	TTC13	3	1	0.210563	0.00329649	0.0202791	FALSE	8	9	8	9	-0.572221
Q69ZW3	Q69ZW3	>sp|Q69ZW3|EHBP1_MOUSE EH domain-binding protein 1 OS=Mus musculus (Mouse) OX=10090 GN=Ehbp1 PE=1 SV=3	EHBP1	17	15	0.0732914	0.004031	0.0238104	FALSE	82	78	82	78	0.199794
Q7TNC4	Q7TNC4	>sp|Q7TNC4|LC7L2_MOUSE Putative RNA-binding protein Luc7-like 2 OS=Mus musculus (Mouse) OX=10090 GN=Luc7l2 PE=1 SV=1	LUC7L2	2	2	-1.73332e-12	0.999998	1	FALSE	10	10	10	10	-0.0450912
Q91WQ3	Q91WQ3	>sp|Q91WQ3|SYYC_MOUSE Tyrosine--tRNA ligase, cytoplasmic OS=Mus musculus (Mouse) OX=10090 GN=Yars PE=1 SV=3	YARS	25	23	-0.204213	1.68112e-09	8.77638e-08	FALSE	119	120	119	120	-0.0842997
Q62418	Q62418	>sp|Q62418|DBNL_MOUSE Drebrin-like protein OS=Mus musculus (Mouse) OX=10090 GN=Dbnl PE=1 SV=2	DBNL	14	13	0.0783855	9.80319e-05	0.00114076	FALSE	65	65	65	65	-0.0445674
P50114	P50114	>sp|P50114|S100B_MOUSE Protein S100-B OS=Mus musculus (Mouse) OX=10090 GN=S100b PE=1 SV=2	S100B	2	1	0	1	1	FALSE	9	7	9	7	1.05597
Q9WTP6	Q9WTP6	>sp|Q9WTP6|KAD2_MOUSE Adenylate kinase 2, mitochondrial OS=Mus musculus (Mouse) OX=10090 GN=Ak2 PE=1 SV=5	AK2	10	9	0	1	1	FALSE	49	47	49	47	0.156648
Q3UZ39;Q91WK0	Q3UZ39;Q91WK0	>sp|Q3UZ39|LRRF1_MOUSE Leucine-rich repeat flightless-interacting protein 1 OS=Mus musculus (Mouse) OX=10090 GN=Lrrfip1 PE=1 SV=2;>sp|Q91WK0|LRRF2_MOUSE Leucine-rich repeat flightless-interacting protein 2 OS=Mus musculus (Mouse) OX=10090 GN=Lrrfip2 PE=1 SV=1	LRRFIP1;LRRFIP2	1	1	0	1	1	FALSE	5	5	5	5	-0.046026
P03975	P03975	>sp|P03975|IGEB_MOUSE IgE-binding protein OS=Mus musculus (Mouse) OX=10090 GN=Iap PE=2 SV=1	IAP	2	1	0	1	1	FALSE	10	7	10	7	1.5324
Q7TME0	Q7TME0	>sp|Q7TME0|PLPR4_MOUSE Phospholipid phosphatase-related protein type 4 OS=Mus musculus (Mouse) OX=10090 GN=Plppr4 PE=1 SV=2	PLPPR4	19	18	-0.0255728	0.468074	0.924743	FALSE	91	90	91	90	0.00943107
Q810A7	Q810A7	>sp|Q810A7|DDX42_MOUSE ATP-dependent RNA helicase DDX42 OS=Mus musculus (Mouse) OX=10090 GN=Ddx42 PE=1 SV=3	DDX42	16	14	0.0559543	0.0795505	0.249008	FALSE	75	71	75	71	0.222219
Q8K2B3	Q8K2B3	>sp|Q8K2B3|SDHA_MOUSE Succinate dehydrogenase [ubiquinone] flavoprotein subunit, mitochondrial OS=Mus musculus (Mouse) OX=10090 GN=Sdha PE=1 SV=1	SDHA	16	16	0.0930915	5.51277e-06	0.000100282	FALSE	79	79	79	79	-0.0440759
Q8K377	Q8K377	>sp|Q8K377|LRRT1_MOUSE Leucine-rich repeat transmembrane neuronal protein 1 OS=Mus musculus (Mouse) OX=10090 GN=Lrrtm1 PE=2 SV=1	LRRTM1	5	4	0.203286	0.000319159	0.00301441	FALSE	24	21	24	21	0.587011
A2AKG8	A2AKG8	>sp|A2AKG8|FOCAD_MOUSE Focadhesin OS=Mus musculus (Mouse) OX=10090 GN=Focad PE=1 SV=1	FOCAD	16	15	1.07078e-17	1	1	FALSE	75	73	75	73	0.0870222
Q8BYB9	Q8BYB9	>sp|Q8BYB9|PGLT1_MOUSE Protein O-glucosyltransferase 1 OS=Mus musculus (Mouse) OX=10090 GN=Poglut1 PE=1 SV=2	POGLUT1	6	5	-0.0223144	0.198123	0.488689	FALSE	27	29	27	29	-0.386692
Q62108	Q62108	>sp|Q62108|DLG4_MOUSE Disks large homolog 4 OS=Mus musculus (Mouse) OX=10090 GN=Dlg4 PE=1 SV=1	DLG4	22	22	-3.38935e-18	1	1	FALSE	110	107	110	107	0.091514
Q9CXF4	Q9CXF4	>sp|Q9CXF4|TBC15_MOUSE TBC1 domain family member 15 OS=Mus musculus (Mouse) OX=10090 GN=Tbc1d15 PE=1 SV=1	TBC1D15	10	8	-3.01942e-18	1	1	FALSE	44	46	44	46	-0.258933
Q9D7X3	Q9D7X3	>sp|Q9D7X3|DUS3_MOUSE Dual specificity protein phosphatase 3 OS=Mus musculus (Mouse) OX=10090 GN=Dusp3 PE=1 SV=1	DUSP3	5	5	-0.0595972	0.0115612	0.0553862	FALSE	25	25	25	25	-0.0444446
Q3TIX9	Q3TIX9	>sp|Q3TIX9|SNUT2_MOUSE U4/U6.U5 tri-snRNP-associated protein 2 OS=Mus musculus (Mouse) OX=10090 GN=Usp39 PE=1 SV=2	USP39	9	8	-1.57698e-18	1	1	FALSE	43	44	43	44	-0.15545
Q80X73	Q80X73	>sp|Q80X73|PELO_MOUSE Protein pelota homolog OS=Mus musculus (Mouse) OX=10090 GN=Pelo PE=1 SV=3	PELO	4	4	7.35044e-19	1	1	FALSE	20	20	20	20	-0.0445575
Q6Y685	Q6Y685	>sp|Q6Y685|TACC1_MOUSE Transforming acidic coiled-coil-containing protein 1 OS=Mus musculus (Mouse) OX=10090 GN=Tacc1 PE=1 SV=1	TACC1	3	2	7.06235e-18	1	1	FALSE	12	12	12	12	-0.0451925
Q9Z0U1	Q9Z0U1	>sp|Q9Z0U1|ZO2_MOUSE Tight junction protein ZO-2 OS=Mus musculus (Mouse) OX=10090 GN=Tjp2 PE=1 SV=2	TJP2	20	19	-0.057292	0.270324	0.61726	FALSE	99	98	99	98	0.00529743
P09242	P09242	>sp|P09242|PPBT_MOUSE Alkaline phosphatase, tissue-nonspecific isozyme OS=Mus musculus (Mouse) OX=10090 GN=Alpl PE=1 SV=2	ALPL	9	8	-0.104275	0.321934	0.697891	FALSE	42	45	42	45	-0.376021
Q91W96	Q91W96	>sp|Q91W96|APC4_MOUSE Anaphase-promoting complex subunit 4 OS=Mus musculus (Mouse) OX=10090 GN=Anapc4 PE=1 SV=1	ANAPC4	13	12	0	1	1	FALSE	62	64	62	64	-0.198446
Q9D7V1	Q9D7V1	>sp|Q9D7V1|SH24A_MOUSE SH2 domain-containing protein 4A OS=Mus musculus (Mouse) OX=10090 GN=Sh2d4a PE=1 SV=1	SH2D4A	1	1	0	1	1	FALSE	4	5	4	5	-0.95557
Q922J3	Q922J3	>sp|Q922J3|CLIP1_MOUSE CAP-Gly domain-containing linker protein 1 OS=Mus musculus (Mouse) OX=10090 GN=Clip1 PE=1 SV=1	CLIP1	33	28	-9.00259e-18	1	1	FALSE	156	154	156	154	0.0199168
P28738	P28738	>sp|P28738|KIF5C_MOUSE Kinesin heavy chain isoform 5C OS=Mus musculus (Mouse) OX=10090 GN=Kif5c PE=1 SV=3	KIF5C	33	27	0.0592238	0.0043649	0.0252806	FALSE	150	144	150	144	0.156125
Q91VS8	Q91VS8	>sp|Q91VS8|FARP2_MOUSE FERM, ARHGEF and pleckstrin domain-containing protein 2 OS=Mus musculus (Mouse) OX=10090 GN=Farp2 PE=1 SV=2	FARP2	4	3	-0.0542211	0.293458	0.653635	FALSE	19	17	19	17	0.471432
Q60598	Q60598	>sp|Q60598|SRC8_MOUSE Src substrate cortactin OS=Mus musculus (Mouse) OX=10090 GN=Cttn PE=1 SV=2	CTTN	13	12	-9.39391e-20	1	1	FALSE	60	60	60	60	-0.0451333
Q0VGY8	Q0VGY8	>sp|Q0VGY8|TANC1_MOUSE Protein TANC1 OS=Mus musculus (Mouse) OX=10090 GN=Tanc1 PE=1 SV=2	TANC1	12	9	-0.25828	2.43601e-13	3.50325e-11	FALSE	49	54	49	54	-0.515861
Q00PI9	Q00PI9	>sp|Q00PI9|HNRL2_MOUSE Heterogeneous nuclear ribonucleoprotein U-like protein 2 OS=Mus musculus (Mouse) OX=10090 GN=Hnrnpul2 PE=1 SV=2	HNRNPUL2	17	15	0.100477	1.46315e-06	3.28003e-05	FALSE	80	80	80	80	-0.0448115
Q3V384	Q3V384	>sp|Q3V384|AFG1L_MOUSE AFG1-like ATPase OS=Mus musculus (Mouse) OX=10090 GN=Afg1l PE=1 SV=1	AFG1L	2	1	-0.0265799	0.464189	0.919968	FALSE	9	8	9	8	0.47596
B2RUJ5;P98084	B2RUJ5;P98084	>sp|B2RUJ5|APBA1_MOUSE Amyloid-beta A4 precursor protein-binding family A member 1 OS=Mus musculus (Mouse) OX=10090 GN=Apba1 PE=1 SV=2;>sp|P98084|APBA2_MOUSE Amyloid-beta A4 precursor protein-binding family A member 2 OS=Mus musculus (Mouse) OX=10090 GN=Apba2 PE=1 SV=2	APBA1;APBA2	2	1	0	1	1	FALSE	8	7	8	7	0.545093
P61255	P61255	>sp|P61255|RL26_MOUSE 60S ribosomal protein L26 OS=Mus musculus (Mouse) OX=10090 GN=Rpl26 PE=1 SV=1	RPL26	6	6	4.34565e-18	1	1	FALSE	29	29	29	29	-0.0439707
Q6PAK3	Q6PAK3	>sp|Q6PAK3|ANM8_MOUSE Protein arginine N-methyltransferase 8 OS=Mus musculus (Mouse) OX=10090 GN=Prmt8 PE=1 SV=2	PRMT8	8	4	-0.209406	0.000310071	0.0029542	FALSE	28	29	28	29	-0.209524
Q62189	Q62189	>sp|Q62189|SNRPA_MOUSE U1 small nuclear ribonucleoprotein A OS=Mus musculus (Mouse) OX=10090 GN=Snrpa PE=1 SV=3	SNRPA	2	2	3.04206e-17	1	1	FALSE	10	10	10	10	-0.0450912
P56818	P56818	>sp|P56818|BACE1_MOUSE Beta-secretase 1 OS=Mus musculus (Mouse) OX=10090 GN=Bace1 PE=1 SV=2	BACE1	4	4	0.0186886	0.440043	0.883146	FALSE	19	20	19	20	-0.283574
Q8BGT5	Q8BGT5	>sp|Q8BGT5|ALAT2_MOUSE Alanine aminotransferase 2 OS=Mus musculus (Mouse) OX=10090 GN=Gpt2 PE=1 SV=1	GPT2	8	5	-0.0699486	0.017104	0.0753566	FALSE	35	34	35	34	0.097948
Q99KR3	Q99KR3	>sp|Q99KR3|LACB2_MOUSE Endoribonuclease LACTB2 OS=Mus musculus (Mouse) OX=10090 GN=Lactb2 PE=1 SV=1	LACTB2	5	5	-1.49043e-14	1	1	FALSE	25	25	25	25	-0.0444446
P46935	P46935	>sp|P46935|NEDD4_MOUSE E3 ubiquitin-protein ligase NEDD4 OS=Mus musculus (Mouse) OX=10090 GN=Nedd4 PE=1 SV=3	NEDD4	24	21	0.121334	0.0175133	0.0768932	FALSE	113	111	113	111	0.0425537
Q922X9	Q922X9	>sp|Q922X9|ANM7_MOUSE Protein arginine N-methyltransferase 7 OS=Mus musculus (Mouse) OX=10090 GN=Prmt7 PE=1 SV=1	PRMT7	3	3	-6.76983e-16	1	1	FALSE	15	14	15	14	0.273844
Q8BW41	Q8BW41	>sp|Q8BW41|PMGT2_MOUSE Protein O-linked-mannose beta-1,4-N-acetylglucosaminyltransferase 2 OS=Mus musculus (Mouse) OX=10090 GN=Pomgnt2 PE=1 SV=1	POMGNT2	12	11	0.0063849	0.598202	1	FALSE	57	57	57	57	-0.0458948
P97467	P97467	>sp|P97467|AMD_MOUSE Peptidyl-glycine alpha-amidating monooxygenase OS=Mus musculus (Mouse) OX=10090 GN=Pam PE=1 SV=2	PAM	6	6	-0.351362	2.24e-15	4.89047e-13	TRUE	29	28	29	28	0.121512
P55258	P55258	>sp|P55258|RAB8A_MOUSE Ras-related protein Rab-8A OS=Mus musculus (Mouse) OX=10090 GN=Rab8a PE=1 SV=2	RAB8A	2	2	-0.0522451	0.113993	0.326025	FALSE	10	10	10	10	-0.0450912
Q9DB34	Q9DB34	>sp|Q9DB34|CHM2A_MOUSE Charged multivesicular body protein 2a OS=Mus musculus (Mouse) OX=10090 GN=Chmp2a PE=1 SV=1	CHMP2A	3	3	-1.07914e-12	0.999997	1	FALSE	15	15	15	15	-0.0447409
Q9ERK4	Q9ERK4	>sp|Q9ERK4|XPO2_MOUSE Exportin-2 OS=Mus musculus (Mouse) OX=10090 GN=Cse1l PE=1 SV=1	CSE1L	27	26	0.0633163	0.000236899	0.00236961	FALSE	132	132	132	132	-0.044126
Q6ZPQ6	Q6ZPQ6	>sp|Q6ZPQ6|PITM2_MOUSE Membrane-associated phosphatidylinositol transfer protein 2 OS=Mus musculus (Mouse) OX=10090 GN=Pitpnm2 PE=1 SV=2	PITPNM2	13	12	-0.00656777	0.584822	1	FALSE	60	60	60	60	-0.0434385
Q8CI78	Q8CI78	>sp|Q8CI78|RMND1_MOUSE Required for meiotic nuclear division protein 1 homolog OS=Mus musculus (Mouse) OX=10090 GN=Rmnd1 PE=1 SV=1	RMND1	2	2	0.229566	0.000264684	0.00258313	FALSE	9	9	9	9	-0.0415247
Q8C129	Q8C129	>sp|Q8C129|LCAP_MOUSE Leucyl-cystinyl aminopeptidase OS=Mus musculus (Mouse) OX=10090 GN=Lnpep PE=1 SV=1	LNPEP	19	19	-0.18472	1.73385e-11	1.55389e-09	FALSE	93	93	93	93	-0.0439825
Q9DBR3	Q9DBR3	>sp|Q9DBR3|ARMC8_MOUSE Armadillo repeat-containing protein 8 OS=Mus musculus (Mouse) OX=10090 GN=Armc8 PE=1 SV=2	ARMC8	15	15	-0.0476141	0.00581073	0.0318164	FALSE	73	74	73	74	-0.110549
Q80WQ2	Q80WQ2	>sp|Q80WQ2|VAC14_MOUSE Protein VAC14 homolog OS=Mus musculus (Mouse) OX=10090 GN=Vac14 PE=1 SV=1	VAC14	18	16	0.0724934	0.00119579	0.00887198	FALSE	84	84	84	84	-0.0434731
B9EJ86	B9EJ86	>sp|B9EJ86|OSBL8_MOUSE Oxysterol-binding protein-related protein 8 OS=Mus musculus (Mouse) OX=10090 GN=Osbpl8 PE=1 SV=1	OSBPL8	19	17	0.0974056	5.41958e-07	1.34994e-05	FALSE	87	91	87	91	-0.264654
Q9R207	Q9R207	>sp|Q9R207|NBN_MOUSE Nibrin OS=Mus musculus (Mouse) OX=10090 GN=Nbn PE=1 SV=1	NBN	2	1	0	1	1	FALSE	7	9	7	9	-1.15843
Q64514	Q64514	>sp|Q64514|TPP2_MOUSE Tripeptidyl-peptidase 2 OS=Mus musculus (Mouse) OX=10090 GN=Tpp2 PE=1 SV=3	TPP2	40	36	-0.0322323	0.0575375	0.194049	FALSE	191	194	191	194	-0.120476
Q3UYV9	Q3UYV9	>sp|Q3UYV9|NCBP1_MOUSE Nuclear cap-binding protein subunit 1 OS=Mus musculus (Mouse) OX=10090 GN=Ncbp1 PE=1 SV=2	NCBP1	10	9	0.0468268	0.0318877	0.123773	FALSE	46	46	46	46	-0.0455631
Q8BR86	Q8BR86	>sp|Q8BR86|KIRR3_MOUSE Kin of IRRE-like protein 3 OS=Mus musculus (Mouse) OX=10090 GN=Kirrel3 PE=1 SV=1	KIRREL3	2	2	0	1	1	FALSE	10	10	10	10	-0.0450912
Q5SVR0	Q5SVR0	>sp|Q5SVR0|TBC9B_MOUSE TBC1 domain family member 9B OS=Mus musculus (Mouse) OX=10090 GN=Tbc1d9b PE=1 SV=1	TBC1D9B	12	10	-0.0288866	0.170698	0.438422	FALSE	55	52	55	52	0.226901
Q9D7N9	Q9D7N9	>sp|Q9D7N9|APMAP_MOUSE Adipocyte plasma membrane-associated protein OS=Mus musculus (Mouse) OX=10090 GN=Apmap PE=1 SV=1	APMAP	12	10	-0.155541	4.42332e-16	1.25631e-13	FALSE	54	55	54	55	-0.133036
Q9DBC3	Q9DBC3	>sp|Q9DBC3|CMTR1_MOUSE Cap-specific mRNA (nucleoside-2'-O-)-methyltransferase 1 OS=Mus musculus (Mouse) OX=10090 GN=Cmtr1 PE=1 SV=1	CMTR1	11	8	0.025475	0.168836	0.435635	FALSE	47	47	47	47	-0.0442957
Q3UYK3	Q3UYK3	>sp|Q3UYK3|TBCD9_MOUSE TBC1 domain family member 9 OS=Mus musculus (Mouse) OX=10090 GN=Tbc1d9 PE=2 SV=2	TBC1D9	8	6	2.09271e-05	0.977773	1	FALSE	35	36	35	36	-0.179564
P03921	P03921	>sp|P03921|NU5M_MOUSE NADH-ubiquinone oxidoreductase chain 5 OS=Mus musculus (Mouse) OX=10090 GN=Mtnd5 PE=1 SV=3	MTND5	6	4	0.166108	0.0473997	0.167881	FALSE	27	23	27	23	0.716689
E9PWI3	E9PWI3	>tr|E9PWI3|E9PWI3_MOUSE Mutated in colorectal cancers OS=Mus musculus (Mouse) OX=10090 GN=Mcc PE=1 SV=1	MCC	5	5	-1.46764e-19	1	1	FALSE	24	25	24	25	-0.238174
Q9CYN9	Q9CYN9	>sp|Q9CYN9|RENR_MOUSE Renin receptor OS=Mus musculus (Mouse) OX=10090 GN=Atp6ap2 PE=1 SV=2	ATP6AP2	10	7	-1.33918e-15	1	1	FALSE	40	39	40	39	0.0759293
P20060	P20060	>sp|P20060|HEXB_MOUSE Beta-hexosaminidase subunit beta OS=Mus musculus (Mouse) OX=10090 GN=Hexb PE=1 SV=2	HEXB	9	9	-0.0345721	0.371551	0.779527	FALSE	42	43	42	43	-0.157724
B1AZP2	B1AZP2	>sp|B1AZP2|DLGP4_MOUSE Disks large-associated protein 4 OS=Mus musculus (Mouse) OX=10090 GN=Dlgap4 PE=1 SV=1	DLGAP4	13	11	1.05141e-16	1	1	FALSE	60	59	60	59	0.0364897
P13707	P13707	>sp|P13707|GPDA_MOUSE Glycerol-3-phosphate dehydrogenase [NAD(+)], cytoplasmic OS=Mus musculus (Mouse) OX=10090 GN=Gpd1 PE=1 SV=3	GPD1	7	6	-0.0807347	0.124132	0.348356	FALSE	33	30	33	30	0.411146
Q9CRA5	Q9CRA5	>sp|Q9CRA5|GOLP3_MOUSE Golgi phosphoprotein 3 OS=Mus musculus (Mouse) OX=10090 GN=Golph3 PE=1 SV=1	GOLPH3	3	2	-3.18279e-17	1	1	FALSE	12	13	12	13	-0.407207
Q9DCX2	Q9DCX2	>sp|Q9DCX2|ATP5H_MOUSE ATP synthase subunit d, mitochondrial OS=Mus musculus (Mouse) OX=10090 GN=Atp5pd PE=1 SV=3	ATP5PD	12	11	0.219264	2.49724e-06	5.18636e-05	FALSE	58	57	58	57	0.0410551
Q9R099	Q9R099	>sp|Q9R099|TBL2_MOUSE Transducin beta-like protein 2 OS=Mus musculus (Mouse) OX=10090 GN=Tbl2 PE=1 SV=2	TBL2	11	9	0	1	1	FALSE	53	47	53	47	0.535517
Q3UTH8	Q3UTH8	>sp|Q3UTH8|ARHG9_MOUSE Rho guanine nucleotide exchange factor 9 OS=Mus musculus (Mouse) OX=10090 GN=Arhgef9 PE=1 SV=1	ARHGEF9	5	2	-0.0927581	0.0819394	0.255332	FALSE	19	23	19	23	-0.941255
Q8VDP3	Q8VDP3	>sp|Q8VDP3|MICA1_MOUSE [F-actin]-monooxygenase MICAL1 OS=Mus musculus (Mouse) OX=10090 GN=Mical1 PE=1 SV=1	MICAL1	3	3	4.58691e-17	1	1	FALSE	15	15	15	15	-0.0447409
Q6PGB8;Q91ZW3	Q6PGB8;Q91ZW3	>sp|Q6PGB8|SMCA1_MOUSE Probable global transcription activator SNF2L1 OS=Mus musculus (Mouse) OX=10090 GN=Smarca1 PE=1 SV=1;>sp|Q91ZW3|SMCA5_MOUSE SWI/SNF-related matrix-associated actin-dependent regulator of chromatin subfamily A member 5 OS=Mus musculus (Mouse) OX=10090 GN=Smarca5 PE=1 SV=1	SMARCA1;SMARCA5	5	5	0.0215608	0.433093	0.872366	FALSE	24	25	24	25	-0.238186
Q6PD19	Q6PD19	>sp|Q6PD19|ARMD3_MOUSE Armadillo-like helical domain-containing protein 3 OS=Mus musculus (Mouse) OX=10090 GN=Armh3 PE=1 SV=2	ARMH3	11	8	1.15987e-18	1	1	FALSE	49	45	49	45	0.367012
P28271	P28271	>sp|P28271|ACOC_MOUSE Cytoplasmic aconitate hydratase OS=Mus musculus (Mouse) OX=10090 GN=Aco1 PE=1 SV=3	ACO1	21	19	-0.128894	9.022e-05	0.0010654	FALSE	101	103	101	103	-0.140437
Q8C3W1	Q8C3W1	>sp|Q8C3W1|CA198_MOUSE Uncharacterized protein C1orf198 homolog OS=Mus musculus (Mouse) OX=10090 GN=MGI:1916801 PE=1 SV=1	MGI:1916801	6	5	-0.0872838	0.030642	0.120264	FALSE	27	28	27	28	-0.21622
Q9D1L0	Q9D1L0	>sp|Q9D1L0|CHCH2_MOUSE Coiled-coil-helix-coiled-coil-helix domain-containing protein 2 OS=Mus musculus (Mouse) OX=10090 GN=Chchd2 PE=2 SV=1	CHCHD2	2	2	0	1	1	FALSE	10	9	10	9	0.425465
O54983	O54983	>sp|O54983|CRYM_MOUSE Ketimine reductase mu-crystallin OS=Mus musculus (Mouse) OX=10090 GN=Crym PE=1 SV=1	CRYM	18	16	0.0403108	0.39513	0.816395	FALSE	87	87	87	87	-0.0446893
D3YZI9	D3YZI9	>sp|D3YZI9|PGBD5_MOUSE PiggyBac transposable element-derived protein 5 OS=Mus musculus (Mouse) OX=10090 GN=Pgbd5 PE=1 SV=1	PGBD5	7	6	-0.0369382	0.423301	0.859	FALSE	34	33	34	33	0.0985807
Q9DCN2	Q9DCN2	>sp|Q9DCN2|NB5R3_MOUSE NADH-cytochrome b5 reductase 3 OS=Mus musculus (Mouse) OX=10090 GN=Cyb5r3 PE=1 SV=3	CYB5R3	19	18	-0.0775666	0.0985788	0.293045	FALSE	93	95	93	95	-0.148491
Q8R2Y8	Q8R2Y8	>sp|Q8R2Y8|PTH2_MOUSE Peptidyl-tRNA hydrolase 2, mitochondrial OS=Mus musculus (Mouse) OX=10090 GN=Ptrh2 PE=1 SV=1	PTRH2	4	4	0.120496	0.000391954	0.00356926	FALSE	20	20	20	20	-0.0445575
Q91YQ5	Q91YQ5	>sp|Q91YQ5|RPN1_MOUSE Dolichyl-diphosphooligosaccharide--protein glycosyltransferase subunit 1 OS=Mus musculus (Mouse) OX=10090 GN=Rpn1 PE=1 SV=1	RPN1	25	25	-1.32941e-17	1	1	FALSE	125	123	125	123	0.0354436
Q811P8	Q811P8	>sp|Q811P8|RHG32_MOUSE Rho GTPase-activating protein 32 OS=Mus musculus (Mouse) OX=10090 GN=Arhgap32 PE=1 SV=2	ARHGAP32	14	14	-0.116964	2.11475e-10	1.41392e-08	FALSE	70	69	70	69	0.0258587
Q91ZN5	Q91ZN5	>sp|Q91ZN5|S35B2_MOUSE Adenosine 3'-phospho 5'-phosphosulfate transporter 1 OS=Mus musculus (Mouse) OX=10090 GN=Slc35b2 PE=1 SV=1	SLC35B2	4	4	0.108835	0.0486744	0.171399	FALSE	20	20	20	20	-0.0445575
P26040;P26041;P26043	P26040;P26041;P26043	>sp|P26040|EZRI_MOUSE Ezrin OS=Mus musculus (Mouse) OX=10090 GN=Ezr PE=1 SV=3;>sp|P26041|MOES_MOUSE Moesin OS=Mus musculus (Mouse) OX=10090 GN=Msn PE=1 SV=3;>sp|P26043|RADI_MOUSE Radixin OS=Mus musculus (Mouse) OX=10090 GN=Rdx PE=1 SV=3	EZR;MSN;RDX	7	7	-0.111177	0.159339	0.418158	FALSE	35	34	35	34	0.0956993
Q91VR5	Q91VR5	>sp|Q91VR5|DDX1_MOUSE ATP-dependent RNA helicase DDX1 OS=Mus musculus (Mouse) OX=10090 GN=Ddx1 PE=1 SV=1	DDX1	22	20	3.39644e-17	1	1	FALSE	108	105	108	105	0.0927339
Q6PIX5	Q6PIX5	>sp|Q6PIX5|RHDF1_MOUSE Inactive rhomboid protein 1 OS=Mus musculus (Mouse) OX=10090 GN=Rhbdf1 PE=1 SV=2	RHBDF1	4	3	-0.0626627	0.116629	0.331821	FALSE	15	20	15	20	-1.38703
P53995	P53995	>sp|P53995|APC1_MOUSE Anaphase-promoting complex subunit 1 OS=Mus musculus (Mouse) OX=10090 GN=Anapc1 PE=1 SV=2	ANAPC1	18	14	-3.11506e-18	1	1	FALSE	82	81	82	81	0.0147595
P53564	P53564	>sp|P53564|CUX1_MOUSE Homeobox protein cut-like 1 OS=Mus musculus (Mouse) OX=10090 GN=Cux1 PE=1 SV=3	CUX1	6	5	-0.0665329	0.00889614	0.04484	FALSE	28	28	28	28	-0.0452169
O35459	O35459	>sp|O35459|ECH1_MOUSE Delta(3,5)-Delta(2,4)-dienoyl-CoA isomerase, mitochondrial OS=Mus musculus (Mouse) OX=10090 GN=Ech1 PE=1 SV=1	ECH1	7	5	-0.135851	0.00142921	0.0102963	FALSE	29	31	29	31	-0.364616
P63085;Q63844	P63085;Q63844	>sp|P63085|MK01_MOUSE Mitogen-activated protein kinase 1 OS=Mus musculus (Mouse) OX=10090 GN=Mapk1 PE=1 SV=3;>sp|Q63844|MK03_MOUSE Mitogen-activated protein kinase 3 OS=Mus musculus (Mouse) OX=10090 GN=Mapk3 PE=1 SV=5	MAPK1;MAPK3	5	5	0.177138	4.43089e-06	8.422e-05	FALSE	25	25	25	25	-0.0444446
Q8R550	Q8R550	>sp|Q8R550|SH3K1_MOUSE SH3 domain-containing kinase-binding protein 1 OS=Mus musculus (Mouse) OX=10090 GN=Sh3kbp1 PE=1 SV=1	SH3KBP1	12	12	0.149275	0.00254164	0.0164734	FALSE	60	58	60	58	0.119934
Q03147	Q03147	>sp|Q03147|CDK7_MOUSE Cyclin-dependent kinase 7 OS=Mus musculus (Mouse) OX=10090 GN=Cdk7 PE=1 SV=2	CDK7	3	3	4.6897e-18	1	1	FALSE	13	13	13	13	-0.0417181
Q8R5C5	Q8R5C5	>sp|Q8R5C5|ACTY_MOUSE Beta-centractin OS=Mus musculus (Mouse) OX=10090 GN=Actr1b PE=1 SV=1	ACTR1B	2	2	-2.17026e-18	1	1	FALSE	10	10	10	10	-0.0450912
P24788	P24788	>sp|P24788|CD11B_MOUSE Cyclin-dependent kinase 11B OS=Mus musculus (Mouse) OX=10090 GN=Cdk11b PE=1 SV=2	CDK11B	6	6	-0.0198748	0.325456	0.703929	FALSE	29	29	29	29	-0.0420168
Q8BWD8	Q8BWD8	>sp|Q8BWD8|CDK19_MOUSE Cyclin-dependent kinase 19 OS=Mus musculus (Mouse) OX=10090 GN=Cdk19 PE=2 SV=1	CDK19	1	1	0	1	1	FALSE	5	4	5	4	0.861346
Q9JHU3	Q9JHU3	>sp|Q9JHU3|CDK20_MOUSE Cyclin-dependent kinase 20 OS=Mus musculus (Mouse) OX=10090 GN=Cdk20 PE=1 SV=1	CDK20	1	1	-0.0373838	0.404589	0.83188	FALSE	4	5	4	5	-0.947666
Q9CYS6	Q9CYS6	>sp|Q9CYS6|CB072_MOUSE Uncharacterized protein C2orf72 homolog OS=Mus musculus (Mouse) OX=10090 GN=MGI:1920042 PE=1 SV=2	MGI:1920042	4	3	0	1	1	FALSE	17	17	17	17	-0.0461385
Q91ZR2	Q91ZR2	>sp|Q91ZR2|SNX18_MOUSE Sorting nexin-18 OS=Mus musculus (Mouse) OX=10090 GN=Snx18 PE=1 SV=1	SNX18	9	9	-0.00280474	0.777345	1	FALSE	44	44	44	44	-0.0434272
Q8K0V4	Q8K0V4	>sp|Q8K0V4|CNOT3_MOUSE CCR4-NOT transcription complex subunit 3 OS=Mus musculus (Mouse) OX=10090 GN=Cnot3 PE=1 SV=1	CNOT3	6	6	-1.8965e-18	1	1	FALSE	29	29	29	29	-0.0453127
P97797	P97797	>sp|P97797|SHPS1_MOUSE Tyrosine-protein phosphatase non-receptor type substrate 1 OS=Mus musculus (Mouse) OX=10090 GN=Sirpa PE=1 SV=2	SIRPA	10	9	-0.0228761	0.514635	0.996582	FALSE	47	47	47	47	-0.0447727
Q80VJ2	Q80VJ2	>sp|Q80VJ2|SRA1_MOUSE Steroid receptor RNA activator 1 OS=Mus musculus (Mouse) OX=10090 GN=Sra1 PE=1 SV=3	SRA1	1	1	0	1	1	FALSE	5	5	5	5	-0.046026
Q91Y86;Q9WTU6	Q91Y86;Q9WTU6	>sp|Q91Y86|MK08_MOUSE Mitogen-activated protein kinase 8 OS=Mus musculus (Mouse) OX=10090 GN=Mapk8 PE=1 SV=1;>sp|Q9WTU6|MK09_MOUSE Mitogen-activated protein kinase 9 OS=Mus musculus (Mouse) OX=10090 GN=Mapk9 PE=1 SV=2	MAPK8;MAPK9	5	4	-1.11039e-18	1	1	FALSE	24	22	24	22	0.367807
O35643	O35643	>sp|O35643|AP1B1_MOUSE AP-1 complex subunit beta-1 OS=Mus musculus (Mouse) OX=10090 GN=Ap1b1 PE=1 SV=2	AP1B1	22	21	4.43666e-17	1	1	FALSE	108	105	108	105	0.0937344
Q9R1P3	Q9R1P3	>sp|Q9R1P3|PSB2_MOUSE Proteasome subunit beta type-2 OS=Mus musculus (Mouse) OX=10090 GN=Psmb2 PE=1 SV=1	PSMB2	11	9	-4.36854e-09	0.999762	1	FALSE	51	53	51	53	-0.230413
P11499	P11499	>sp|P11499|HS90B_MOUSE Heat shock protein HSP 90-beta OS=Mus musculus (Mouse) OX=10090 GN=Hsp90ab1 PE=1 SV=3	HSP90AB1	25	25	-1.41759e-17	1	1	FALSE	124	123	124	123	-0.00449858
P07901	P07901	>sp|P07901|HS90A_MOUSE Heat shock protein HSP 90-alpha OS=Mus musculus (Mouse) OX=10090 GN=Hsp90aa1 PE=1 SV=4	HSP90AA1	22	20	0	1	1	FALSE	108	104	108	104	0.140429
Q8K209	Q8K209	>sp|Q8K209|AGRG1_MOUSE Adhesion G-protein coupled receptor G1 OS=Mus musculus (Mouse) OX=10090 GN=Adgrg1 PE=1 SV=1	ADGRG1	6	6	0.155948	0.00155724	0.0110002	FALSE	29	30	29	30	-0.205789
Q61490	Q61490	>sp|Q61490|CD166_MOUSE CD166 antigen OS=Mus musculus (Mouse) OX=10090 GN=Alcam PE=1 SV=3	ALCAM	13	13	-0.232142	2.77661e-20	1.62795e-17	FALSE	64	65	64	65	-0.119309
A2A8U2	A2A8U2	>sp|A2A8U2|TM201_MOUSE Transmembrane protein 201 OS=Mus musculus (Mouse) OX=10090 GN=Tmem201 PE=1 SV=1	TMEM201	5	3	0.0559673	0.188198	0.471837	FALSE	21	19	21	19	0.4251
Q91WD5	Q91WD5	>sp|Q91WD5|NDUS2_MOUSE NADH dehydrogenase [ubiquinone] iron-sulfur protein 2, mitochondrial OS=Mus musculus (Mouse) OX=10090 GN=Ndufs2 PE=1 SV=1	NDUFS2	20	20	0.225278	3.13269e-07	8.21881e-06	FALSE	100	99	100	99	0.00535392
Q9WU56	Q9WU56	>sp|Q9WU56|TRUA_MOUSE tRNA pseudouridine synthase A OS=Mus musculus (Mouse) OX=10090 GN=Pus1 PE=1 SV=2	PUS1	4	2	0.0842632	0.0335734	0.128656	FALSE	18	15	18	15	0.804256
Q505F5	Q505F5	>sp|Q505F5|LRC47_MOUSE Leucine-rich repeat-containing protein 47 OS=Mus musculus (Mouse) OX=10090 GN=Lrrc47 PE=1 SV=1	LRRC47	19	19	0	1	1	FALSE	95	95	95	95	-0.044099
P97783	P97783	>sp|P97783|AF1Q_MOUSE Protein AF1q OS=Mus musculus (Mouse) OX=10090 GN=Mllt11 PE=1 SV=1	MLLT11	1	1	0	1	1	FALSE	5	5	5	5	-0.046026
B7ZMP1	B7ZMP1	>sp|B7ZMP1|XPP3_MOUSE Xaa-Pro aminopeptidase 3 OS=Mus musculus (Mouse) OX=10090 GN=Xpnpep3 PE=1 SV=1	XPNPEP3	3	3	7.42215e-20	1	1	FALSE	15	15	15	15	-0.0447409
Q9DBE8	Q9DBE8	>sp|Q9DBE8|ALG2_MOUSE Alpha-1,3/1,6-mannosyltransferase ALG2 OS=Mus musculus (Mouse) OX=10090 GN=Alg2 PE=1 SV=2	ALG2	15	13	-0.0332908	0.135923	0.372971	FALSE	70	72	70	72	-0.181568
Q99M51	Q99M51	>sp|Q99M51|NCK1_MOUSE Cytoplasmic protein NCK1 OS=Mus musculus (Mouse) OX=10090 GN=Nck1 PE=1 SV=1	NCK1	6	6	-0.0142143	0.418558	0.852552	FALSE	29	29	29	29	-0.0445139
Q501J6;Q61656	Q501J6;Q61656	>sp|Q501J6|DDX17_MOUSE Probable ATP-dependent RNA helicase DDX17 OS=Mus musculus (Mouse) OX=10090 GN=Ddx17 PE=1 SV=1;>sp|Q61656|DDX5_MOUSE Probable ATP-dependent RNA helicase DDX5 OS=Mus musculus (Mouse) OX=10090 GN=Ddx5 PE=1 SV=2	DDX17;DDX5	6	6	0.036084	0.149137	0.39843	FALSE	30	30	30	30	-0.0443681
Q9D6R2	Q9D6R2	>sp|Q9D6R2|IDH3A_MOUSE Isocitrate dehydrogenase [NAD] subunit alpha, mitochondrial OS=Mus musculus (Mouse) OX=10090 GN=Idh3a PE=1 SV=1	IDH3A	17	13	0.169663	0.0257677	0.104413	FALSE	82	76	82	76	0.327501
Q9D8E6	Q9D8E6	>sp|Q9D8E6|RL4_MOUSE 60S ribosomal protein L4 OS=Mus musculus (Mouse) OX=10090 GN=Rpl4 PE=1 SV=3	RPL4	11	10	5.20765e-17	1	1	FALSE	53	54	53	54	-0.133961
P11276	P11276	>sp|P11276|FINC_MOUSE Fibronectin OS=Mus musculus (Mouse) OX=10090 GN=Fn1 PE=1 SV=4	FN1	19	12	-0.381505	0.0130411	0.0610187	FALSE	74	94	74	94	-1.21234
P97371	P97371	>sp|P97371|PSME1_MOUSE Proteasome activator complex subunit 1 OS=Mus musculus (Mouse) OX=10090 GN=Psme1 PE=1 SV=2	PSME1	13	12	0.0965686	0.000581737	0.00489945	FALSE	65	62	65	62	0.18558
Q9CQR6	Q9CQR6	>sp|Q9CQR6|PPP6_MOUSE Serine/threonine-protein phosphatase 6 catalytic subunit OS=Mus musculus (Mouse) OX=10090 GN=Ppp6c PE=1 SV=1	PPP6C	6	5	-1.75892e-21	1	1	FALSE	28	28	28	28	-0.0438272
Q8CHX7	Q8CHX7	>sp|Q8CHX7|RFTN2_MOUSE Raftlin-2 OS=Mus musculus (Mouse) OX=10090 GN=Rftn2 PE=1 SV=3	RFTN2	5	5	-4.53976e-19	1	1	FALSE	25	25	25	25	-0.0444446
Q8K1A6	Q8K1A6	>sp|Q8K1A6|C2D1A_MOUSE Coiled-coil and C2 domain-containing protein 1A OS=Mus musculus (Mouse) OX=10090 GN=Cc2d1a PE=1 SV=2	CC2D1A	20	19	0.0464066	0.0874224	0.267677	FALSE	95	93	95	93	0.0597828
Q3UHB1	Q3UHB1	>sp|Q3UHB1|NT5D3_MOUSE 5'-nucleotidase domain-containing protein 3 OS=Mus musculus (Mouse) OX=10090 GN=Nt5dc3 PE=1 SV=1	NT5DC3	20	20	0.17435	0.0104008	0.0509039	FALSE	99	99	99	99	-0.0436236
P24527	P24527	>sp|P24527|LKHA4_MOUSE Leukotriene A-4 hydrolase OS=Mus musculus (Mouse) OX=10090 GN=Lta4h PE=1 SV=4	LTA4H	27	24	0	1	1	FALSE	127	124	127	124	0.0726398
E9PV26	E9PV26	>tr|E9PV26|E9PV26_MOUSE DUF4596 domain-containing protein OS=Mus musculus (Mouse) OX=10090 GN=Prr36 PE=1 SV=1	PRR36	9	8	0.225965	4.10739e-09	1.88593e-07	FALSE	43	40	43	40	0.304855
Q91ZP9	Q91ZP9	>sp|Q91ZP9|NECA2_MOUSE N-terminal EF-hand calcium-binding protein 2 OS=Mus musculus (Mouse) OX=10090 GN=Necab2 PE=1 SV=1	NECAB2	14	13	-5.10755e-17	1	1	FALSE	70	68	70	68	0.0974666
P27601	P27601	>sp|P27601|GNA13_MOUSE Guanine nucleotide-binding protein subunit alpha-13 OS=Mus musculus (Mouse) OX=10090 GN=Gna13 PE=1 SV=1	GNA13	11	11	-0.0288838	0.162482	0.423978	FALSE	55	55	55	55	-0.0441907
Q8VEB4	Q8VEB4	>sp|Q8VEB4|PAG15_MOUSE Group XV phospholipase A2 OS=Mus musculus (Mouse) OX=10090 GN=Pla2g15 PE=1 SV=1	PLA2G15	6	5	9.31928e-17	1	1	FALSE	26	25	26	25	0.13989
P16460	P16460	>sp|P16460|ASSY_MOUSE Argininosuccinate synthase OS=Mus musculus (Mouse) OX=10090 GN=Ass1 PE=1 SV=1	ASS1	15	15	1.4075e-16	1	1	FALSE	74	74	74	74	-0.0441774
Q9WU40	Q9WU40	>sp|Q9WU40|MAN1_MOUSE Inner nuclear membrane protein Man1 OS=Mus musculus (Mouse) OX=10090 GN=Lemd3 PE=1 SV=2	LEMD3	3	3	0	1	1	FALSE	14	15	14	15	-0.36624
P30285	P30285	>sp|P30285|CDK4_MOUSE Cyclin-dependent kinase 4 OS=Mus musculus (Mouse) OX=10090 GN=Cdk4 PE=1 SV=1	CDK4	7	5	1.43966e-17	1	1	FALSE	33	31	33	31	0.255872
Q91YE8	Q91YE8	>sp|Q91YE8|SYNP2_MOUSE Synaptopodin-2 OS=Mus musculus (Mouse) OX=10090 GN=Synpo2 PE=1 SV=2	SYNPO2	8	8	-0.00576986	0.722701	1	FALSE	39	39	39	39	-0.0453517
P05201	P05201	>sp|P05201|AATC_MOUSE Aspartate aminotransferase, cytoplasmic OS=Mus musculus (Mouse) OX=10090 GN=Got1 PE=1 SV=3	GOT1	16	15	-1.49499e-17	1	1	FALSE	77	77	77	77	-0.0432139
O89079	O89079	>sp|O89079|COPE_MOUSE Coatomer subunit epsilon OS=Mus musculus (Mouse) OX=10090 GN=Cope PE=1 SV=3	COPE	11	8	-0.0110928	0.558222	1	FALSE	50	52	50	52	-0.234526
Q8BYH7	Q8BYH7	>sp|Q8BYH7|TBC17_MOUSE TBC1 domain family member 17 OS=Mus musculus (Mouse) OX=10090 GN=Tbc1d17 PE=1 SV=2	TBC1D17	6	5	0.0679188	0.0226546	0.0939465	FALSE	29	27	29	27	0.294455
Q8VDL4	Q8VDL4	>sp|Q8VDL4|ADPGK_MOUSE ADP-dependent glucokinase OS=Mus musculus (Mouse) OX=10090 GN=Adpgk PE=1 SV=2	ADPGK	4	4	-6.15736e-19	1	1	FALSE	20	19	20	19	0.197977
P62192	P62192	>sp|P62192|PRS4_MOUSE 26S proteasome regulatory subunit 4 OS=Mus musculus (Mouse) OX=10090 GN=Psmc1 PE=1 SV=1	PSMC1	22	21	-0.0308361	0.0272474	0.109478	FALSE	108	107	108	107	0.00132856
Q61823	Q61823	>sp|Q61823|PDCD4_MOUSE Programmed cell death protein 4 OS=Mus musculus (Mouse) OX=10090 GN=Pdcd4 PE=1 SV=1	PDCD4	7	7	-5.8647e-19	1	1	FALSE	32	33	32	33	-0.188771
Q9D1P0	Q9D1P0	>sp|Q9D1P0|RM13_MOUSE 39S ribosomal protein L13, mitochondrial OS=Mus musculus (Mouse) OX=10090 GN=Mrpl13 PE=1 SV=1	MRPL13	8	7	0.109383	0.000183137	0.00192004	FALSE	38	37	38	37	0.0846167
O88809	O88809	>sp|O88809|DCX_MOUSE Neuronal migration protein doublecortin OS=Mus musculus (Mouse) OX=10090 GN=Dcx PE=1 SV=1	DCX	8	7	0.166775	3.32867e-05	0.000460455	FALSE	37	38	37	38	-0.171465
P97792	P97792	>sp|P97792|CXAR_MOUSE Coxsackievirus and adenovirus receptor homolog OS=Mus musculus (Mouse) OX=10090 GN=Cxadr PE=1 SV=1	CXADR	10	10	-0.14789	4.39275e-05	0.000574297	FALSE	50	50	50	50	-0.0442122
Q7TPM1	Q7TPM1	>sp|Q7TPM1|PRC2B_MOUSE Protein PRRC2B OS=Mus musculus (Mouse) OX=10090 GN=Prrc2b PE=1 SV=1	PRRC2B	7	5	1.39207e-20	1	1	FALSE	31	30	31	30	0.111395
O35350	O35350	>sp|O35350|CAN1_MOUSE Calpain-1 catalytic subunit OS=Mus musculus (Mouse) OX=10090 GN=Capn1 PE=1 SV=1	CAPN1	19	15	-0.115588	0.210913	0.513603	FALSE	83	86	83	86	-0.217203
Q8BT60	Q8BT60	>sp|Q8BT60|CPNE3_MOUSE Copine-3 OS=Mus musculus (Mouse) OX=10090 GN=Cpne3 PE=1 SV=2	CPNE3	6	4	0	1	1	FALSE	26	28	26	28	-0.398165
Q80YA3	Q80YA3	>sp|Q80YA3|DDHD1_MOUSE Phospholipase DDHD1 OS=Mus musculus (Mouse) OX=10090 GN=Ddhd1 PE=1 SV=1	DDHD1	3	3	-0.172876	0.00294644	0.0184837	FALSE	14	15	14	15	-0.363609
Q9CPQ8	Q9CPQ8	>sp|Q9CPQ8|ATP5L_MOUSE ATP synthase subunit g, mitochondrial OS=Mus musculus (Mouse) OX=10090 GN=Atp5mg PE=1 SV=1	ATP5MG	6	4	0.433141	4.77253e-10	2.8419e-08	TRUE	28	25	28	25	0.492616
Q8CEE7	Q8CEE7	>sp|Q8CEE7|RDH13_MOUSE Retinol dehydrogenase 13 OS=Mus musculus (Mouse) OX=10090 GN=Rdh13 PE=1 SV=1	RDH13	5	5	0.154034	2.80681e-05	0.000394714	FALSE	25	25	25	25	-0.0444446
Q5DU31	Q5DU31	>sp|Q5DU31|ICEF1_MOUSE Interactor protein for cytohesin exchange factors 1 OS=Mus musculus (Mouse) OX=10090 GN=Ipcef1 PE=1 SV=2	IPCEF1	1	1	0	1	1	FALSE	5	5	5	5	-0.046026
Q8BJW6	Q8BJW6	>sp|Q8BJW6|EIF2A_MOUSE Eukaryotic translation initiation factor 2A OS=Mus musculus (Mouse) OX=10090 GN=Eif2a PE=1 SV=2	EIF2A	6	6	0.00215373	0.815169	1	FALSE	30	30	30	30	-0.0443681
Q9ESZ8	Q9ESZ8	>sp|Q9ESZ8|GTF2I_MOUSE General transcription factor II-I OS=Mus musculus (Mouse) OX=10090 GN=Gtf2i PE=1 SV=3	GTF2I	17	15	0.00593467	0.702275	1	FALSE	78	77	78	77	0.0179419
D3YXK2;Q80YR5	D3YXK2;Q80YR5	>sp|D3YXK2|SAFB1_MOUSE Scaffold attachment factor B1 OS=Mus musculus (Mouse) OX=10090 GN=Safb PE=1 SV=2;>sp|Q80YR5|SAFB2_MOUSE Scaffold attachment factor B2 OS=Mus musculus (Mouse) OX=10090 GN=Safb2 PE=1 SV=2	SAFB;SAFB2	2	2	-1.24104e-21	1	1	FALSE	10	10	10	10	-0.0450912
Q80YX1	Q80YX1	>sp|Q80YX1|TENA_MOUSE Tenascin OS=Mus musculus (Mouse) OX=10090 GN=Tnc PE=1 SV=1	TNC	22	18	-0.698857	2.97969e-11	2.52347e-09	TRUE	98	108	98	108	-0.518826
P63085	P63085	>sp|P63085|MK01_MOUSE Mitogen-activated protein kinase 1 OS=Mus musculus (Mouse) OX=10090 GN=Mapk1 PE=1 SV=3	MAPK1	11	11	0.152202	1.2867e-05	0.000207781	FALSE	55	55	55	55	-0.0441907
Q62193	Q62193	>sp|Q62193|RFA2_MOUSE Replication protein A 32 kDa subunit OS=Mus musculus (Mouse) OX=10090 GN=Rpa2 PE=1 SV=1	RPA2	3	2	0	1	1	FALSE	11	10	11	10	0.384835
P63318	P63318	>sp|P63318|KPCG_MOUSE Protein kinase C gamma type OS=Mus musculus (Mouse) OX=10090 GN=Prkcg PE=1 SV=1	PRKCG	18	18	-0.189188	0.0151167	0.0684609	FALSE	89	89	89	89	-0.0444147
Q6PFD5	Q6PFD5	>sp|Q6PFD5|DLGP3_MOUSE Disks large-associated protein 3 OS=Mus musculus (Mouse) OX=10090 GN=Dlgap3 PE=1 SV=1	DLGAP3	4	3	-1.10171e-15	1	1	FALSE	19	17	19	17	0.474265
Q9ER72	Q9ER72	>sp|Q9ER72|SYCC_MOUSE Cysteine--tRNA ligase, cytoplasmic OS=Mus musculus (Mouse) OX=10090 GN=Cars PE=1 SV=2	CARS	25	23	-0.229242	2.02835e-07	5.68385e-06	FALSE	121	121	121	121	-0.0439695
Q8K2K6	Q8K2K6	>sp|Q8K2K6|AGFG1_MOUSE Arf-GAP domain and FG repeat-containing protein 1 OS=Mus musculus (Mouse) OX=10090 GN=Agfg1 PE=1 SV=2	AGFG1	5	5	0.0372086	0.116432	0.331754	FALSE	25	25	25	25	-0.0444446
Q63739	Q63739	>sp|Q63739|TP4A1_MOUSE Protein tyrosine phosphatase type IVA 1 OS=Mus musculus (Mouse) OX=10090 GN=Ptp4a1 PE=1 SV=1	PTP4A1	6	5	-6.81398e-17	1	1	FALSE	25	25	25	25	-0.0438153
Q9D658	Q9D658	>sp|Q9D658|TP4A3_MOUSE Protein tyrosine phosphatase type IVA 3 OS=Mus musculus (Mouse) OX=10090 GN=Ptp4a3 PE=1 SV=1	PTP4A3	2	2	0.0428617	0.167722	0.433494	FALSE	9	10	9	10	-0.514471
Q9QXS1	Q9QXS1	>sp|Q9QXS1|PLEC_MOUSE Plectin OS=Mus musculus (Mouse) OX=10090 GN=Plec PE=1 SV=3	PLEC	65	52	-0.250204	0.000899536	0.00697484	FALSE	290	308	290	308	-0.34117
P22682	P22682	>sp|P22682|CBL_MOUSE E3 ubiquitin-protein ligase CBL OS=Mus musculus (Mouse) OX=10090 GN=Cbl PE=1 SV=3	CBL	11	7	-0.0285172	0.211624	0.514842	FALSE	46	43	46	43	0.282192
Q61191	Q61191	>sp|Q61191|HCFC1_MOUSE Host cell factor 1 OS=Mus musculus (Mouse) OX=10090 GN=Hcfc1 PE=1 SV=2	HCFC1	17	15	2.94002e-13	0.999998	1	FALSE	81	81	81	81	-0.0444985
Q62311	Q62311	>sp|Q62311|TAF6_MOUSE Transcription initiation factor TFIID subunit 6 OS=Mus musculus (Mouse) OX=10090 GN=Taf6 PE=1 SV=1	TAF6	1	1	0	1	1	FALSE	4	5	4	5	-0.95557
E9PY46	E9PY46	>sp|E9PY46|IF140_MOUSE Intraflagellar transport protein 140 homolog OS=Mus musculus (Mouse) OX=10090 GN=Ift140 PE=1 SV=1	IFT140	8	8	-8.36408e-19	1	1	FALSE	38	37	38	37	0.0850277
Q3TES0	Q3TES0	>sp|Q3TES0|IQEC3_MOUSE IQ motif and SEC7 domain-containing protein 3 OS=Mus musculus (Mouse) OX=10090 GN=Iqsec3 PE=1 SV=1	IQSEC3	15	14	-0.0202389	0.521241	1	FALSE	69	68	69	68	0.025179
Q810U3	Q810U3	>sp|Q810U3|NFASC_MOUSE Neurofascin OS=Mus musculus (Mouse) OX=10090 GN=Nfasc PE=1 SV=1	NFASC	17	16	-4.44316e-16	1	1	FALSE	82	83	82	83	-0.103833
Q9D1E6	Q9D1E6	>sp|Q9D1E6|TBCB_MOUSE Tubulin-folding cofactor B OS=Mus musculus (Mouse) OX=10090 GN=Tbcb PE=1 SV=2	TBCB	7	7	0.111181	5.56075e-05	0.000706401	FALSE	35	34	35	34	0.0956993
Q3UH60	Q3UH60	>sp|Q3UH60|DIP2B_MOUSE Disco-interacting protein 2 homolog B OS=Mus musculus (Mouse) OX=10090 GN=Dip2b PE=1 SV=1	DIP2B	25	23	-7.07327e-16	1	1	FALSE	116	117	116	117	-0.0851575
Q91ZA3	Q91ZA3	>sp|Q91ZA3|PCCA_MOUSE Propionyl-CoA carboxylase alpha chain, mitochondrial OS=Mus musculus (Mouse) OX=10090 GN=Pcca PE=1 SV=2	PCCA	27	24	0.0482856	0.000113849	0.00129661	FALSE	131	127	131	127	0.107883
Q8CGK3	Q8CGK3	>sp|Q8CGK3|LONM_MOUSE Lon protease homolog, mitochondrial OS=Mus musculus (Mouse) OX=10090 GN=Lonp1 PE=1 SV=2	LONP1	21	21	0.0422712	0.00484875	0.0276434	FALSE	104	104	104	104	-0.0440537
Q6A068	Q6A068	>sp|Q6A068|CDC5L_MOUSE Cell division cycle 5-like protein OS=Mus musculus (Mouse) OX=10090 GN=Cdc5l PE=1 SV=2	CDC5L	12	11	0.0828177	0.00168287	0.0117247	FALSE	57	57	57	57	-0.0448844
G5E829	G5E829	>sp|G5E829|AT2B1_MOUSE Plasma membrane calcium-transporting ATPase 1 OS=Mus musculus (Mouse) OX=10090 GN=Atp2b1 PE=1 SV=1	ATP2B1	22	18	-0.0286734	0.207812	0.508163	FALSE	97	99	97	99	-0.142985
Q9CQ48	Q9CQ48	>sp|Q9CQ48|NUDC2_MOUSE NudC domain-containing protein 2 OS=Mus musculus (Mouse) OX=10090 GN=Nudcd2 PE=1 SV=1	NUDCD2	2	2	0	1	1	FALSE	10	10	10	10	-0.0450912
Q9JHQ5	Q9JHQ5	>sp|Q9JHQ5|LZTL1_MOUSE Leucine zipper transcription factor-like protein 1 OS=Mus musculus (Mouse) OX=10090 GN=Lztfl1 PE=1 SV=1	LZTFL1	9	7	0	1	1	FALSE	43	37	43	37	0.680302
P51174	P51174	>sp|P51174|ACADL_MOUSE Long-chain specific acyl-CoA dehydrogenase, mitochondrial OS=Mus musculus (Mouse) OX=10090 GN=Acadl PE=1 SV=2	ACADL	13	13	-0.0893461	0.0292282	0.11597	FALSE	65	65	65	65	-0.0441573
H3BKQ3	H3BKQ3	>tr|H3BKQ3|H3BKQ3_MOUSE Rab-GAP TBC domain-containing protein OS=Mus musculus (Mouse) OX=10090 GN=Evi5l PE=1 SV=1	EVI5L	15	11	0.0466491	0.1334	0.367598	FALSE	70	65	70	65	0.316251
O08586	O08586	>sp|O08586|PTEN_MOUSE Phosphatidylinositol 3,4,5-trisphosphate 3-phosphatase and dual-specificity protein phosphatase PTEN OS=Mus musculus (Mouse) OX=10090 GN=Pten PE=1 SV=1	PTEN	6	6	0.102565	3.30001e-06	6.56728e-05	FALSE	29	30	29	30	-0.207649
Q9JKD3	Q9JKD3	>sp|Q9JKD3|SCAM5_MOUSE Secretory carrier-associated membrane protein 5 OS=Mus musculus (Mouse) OX=10090 GN=Scamp5 PE=1 SV=1	SCAMP5	2	2	-1.79712e-19	1	1	FALSE	10	10	10	10	-0.0450912
Q3TJZ6	Q3TJZ6	>sp|Q3TJZ6|FA98A_MOUSE Protein FAM98A OS=Mus musculus (Mouse) OX=10090 GN=Fam98a PE=1 SV=1	FAM98A	5	5	6.38226e-17	1	1	FALSE	25	24	25	24	0.149422
Q8BR70	Q8BR70	>sp|Q8BR70|YIPF6_MOUSE Protein YIPF6 OS=Mus musculus (Mouse) OX=10090 GN=Yipf6 PE=1 SV=1	YIPF6	1	1	-0.126642	0.0340732	0.130178	FALSE	5	5	5	5	-0.046026
Q9JHI5	Q9JHI5	>sp|Q9JHI5|IVD_MOUSE Isovaleryl-CoA dehydrogenase, mitochondrial OS=Mus musculus (Mouse) OX=10090 GN=Ivd PE=1 SV=1	IVD	14	13	7.1578e-18	1	1	FALSE	66	66	66	66	-0.0433379
Q91WM2	Q91WM2	>sp|Q91WM2|HDHD5_MOUSE Haloacid dehalogenase-like hydrolase domain-containing 5 OS=Mus musculus (Mouse) OX=10090 GN=Hdhd5 PE=1 SV=1	HDHD5	4	3	2.37645e-17	1	1	FALSE	17	16	17	16	0.237077
Q8BHW2	Q8BHW2	>sp|Q8BHW2|OSCP1_MOUSE Protein OSCP1 OS=Mus musculus (Mouse) OX=10090 GN=Oscp1 PE=1 SV=1	OSCP1	9	8	-0.035532	0.0860378	0.264641	FALSE	43	43	43	43	-0.0425499
Q3UHB8	Q3UHB8	>sp|Q3UHB8|CC177_MOUSE Coiled-coil domain-containing protein 177 OS=Mus musculus (Mouse) OX=10090 GN=Ccdc177 PE=1 SV=1	CCDC177	5	4	0.0591071	0.0958127	0.2874	FALSE	23	21	23	21	0.384165
Q8K4Z5	Q8K4Z5	>sp|Q8K4Z5|SF3A1_MOUSE Splicing factor 3A subunit 1 OS=Mus musculus (Mouse) OX=10090 GN=Sf3a1 PE=1 SV=1	SF3A1	16	15	0	1	1	FALSE	79	78	79	78	0.0184348
Q6IRU2	Q6IRU2	>sp|Q6IRU2|TPM4_MOUSE Tropomyosin alpha-4 chain OS=Mus musculus (Mouse) OX=10090 GN=Tpm4 PE=1 SV=3	TPM4	9	9	-0.00198217	0.896475	1	FALSE	45	45	45	45	-0.0442385
D3YXK0	D3YXK0	>tr|D3YXK0|D3YXK0_MOUSE Janus kinase and microtubule-interacting protein 2 OS=Mus musculus (Mouse) OX=10090 GN=Jakmip2 PE=1 SV=2	JAKMIP2	10	10	0.0240532	0.387185	0.804716	FALSE	49	47	49	47	0.156637
Q8BHG2	Q8BHG2	>sp|Q8BHG2|CZIB_MOUSE CXXC motif containing zinc binding protein OS=Mus musculus (Mouse) OX=10090 GN=Czib PE=1 SV=1	CZIB	4	4	0	1	1	FALSE	19	20	19	20	-0.283574
Q9DBG5	Q9DBG5	>sp|Q9DBG5|PLIN3_MOUSE Perilipin-3 OS=Mus musculus (Mouse) OX=10090 GN=Plin3 PE=1 SV=1	PLIN3	14	12	-0.0699628	0.155961	0.411198	FALSE	63	68	63	68	-0.41686
Q6DFY8	Q6DFY8	>sp|Q6DFY8|BRNP2_MOUSE BMP/retinoic acid-inducible neural-specific protein 2 OS=Mus musculus (Mouse) OX=10090 GN=Brinp2 PE=1 SV=1	BRINP2	9	9	0.0414708	0.286512	0.643238	FALSE	44	43	44	43	0.0665448
P70290	P70290	>sp|P70290|EM55_MOUSE 55 kDa erythrocyte membrane protein OS=Mus musculus (Mouse) OX=10090 GN=Mpp1 PE=1 SV=1	MPP1	9	8	-1.28297e-19	1	1	FALSE	44	42	44	42	0.180624
P38647	P38647	>sp|P38647|GRP75_MOUSE Stress-70 protein, mitochondrial OS=Mus musculus (Mouse) OX=10090 GN=Hspa9 PE=1 SV=3	HSPA9	35	32	0.053989	0.00575156	0.0316294	FALSE	165	168	165	168	-0.132108
P39688	P39688	>sp|P39688|FYN_MOUSE Tyrosine-protein kinase Fyn OS=Mus musculus (Mouse) OX=10090 GN=Fyn PE=1 SV=4	FYN	9	7	0.0872694	0.0008935	0.00694216	FALSE	40	41	40	41	-0.164802
Q9JKF7	Q9JKF7	>sp|Q9JKF7|RM39_MOUSE 39S ribosomal protein L39, mitochondrial OS=Mus musculus (Mouse) OX=10090 GN=Mrpl39 PE=1 SV=4	MRPL39	7	7	0.173015	0.000393641	0.00357608	FALSE	35	34	35	34	0.0940246
P70208	P70208	>sp|P70208|PLXA3_MOUSE Plexin-A3 OS=Mus musculus (Mouse) OX=10090 GN=Plxna3 PE=1 SV=2	PLXNA3	12	10	-0.0677118	0.335269	0.720039	FALSE	52	53	52	53	-0.134994
Q3UPL0	Q3UPL0	>sp|Q3UPL0|SC31A_MOUSE Protein transport protein Sec31A OS=Mus musculus (Mouse) OX=10090 GN=Sec31a PE=1 SV=2	SEC31A	21	20	-1.54006e-16	1	1	FALSE	103	103	103	103	-0.0441387
Q91X58	Q91X58	>sp|Q91X58|ZFN2B_MOUSE AN1-type zinc finger protein 2B OS=Mus musculus (Mouse) OX=10090 GN=Zfand2b PE=1 SV=1	ZFAND2B	1	1	0.116823	0.0634548	0.20961	FALSE	5	5	5	5	-0.046026
Q99M87	Q99M87	>sp|Q99M87|DNJA3_MOUSE DnaJ homolog subfamily A member 3, mitochondrial OS=Mus musculus (Mouse) OX=10090 GN=Dnaja3 PE=1 SV=1	DNAJA3	10	9	0.0335008	0.267282	0.611412	FALSE	47	48	47	48	-0.146019
Q80U63	Q80U63	>sp|Q80U63|MFN2_MOUSE Mitofusin-2 OS=Mus musculus (Mouse) OX=10090 GN=Mfn2 PE=1 SV=3	MFN2	14	12	0.0309438	0.251986	0.585504	FALSE	67	65	67	65	0.101429
Q9D880	Q9D880	>sp|Q9D880|TIM50_MOUSE Mitochondrial import inner membrane translocase subunit TIM50 OS=Mus musculus (Mouse) OX=10090 GN=Timm50 PE=1 SV=1	TIMM50	7	7	0.0647893	0.00264842	0.016949	FALSE	35	35	35	35	-0.0443129
Q8BGY4	Q8BGY4	>sp|Q8BGY4|KLH26_MOUSE Kelch-like protein 26 OS=Mus musculus (Mouse) OX=10090 GN=Klhl26 PE=1 SV=1	KLHL26	3	2	-3.64464e-17	1	1	FALSE	15	13	15	13	0.613184
P17879;Q61696	P17879;Q61696	>sp|P17879|HS71B_MOUSE Heat shock 70 kDa protein 1B OS=Mus musculus (Mouse) OX=10090 GN=Hspa1b PE=1 SV=3;>sp|Q61696|HS71A_MOUSE Heat shock 70 kDa protein 1A OS=Mus musculus (Mouse) OX=10090 GN=Hspa1a PE=1 SV=2	HSPA1B;HSPA1A	8	7	-0.195249	1.44904e-07	4.26432e-06	FALSE	35	39	35	39	-0.561906
Q8K3R3	Q8K3R3	>sp|Q8K3R3|PLCD4_MOUSE 1-phosphatidylinositol 4,5-bisphosphate phosphodiesterase delta-4 OS=Mus musculus (Mouse) OX=10090 GN=Plcd4 PE=1 SV=2	PLCD4	10	10	-1.66145e-19	1	1	FALSE	49	46	49	46	0.26269
P53395	P53395	>sp|P53395|ODB2_MOUSE Lipoamide acyltransferase component of branched-chain alpha-keto acid dehydrogenase complex, mitochondrial OS=Mus musculus (Mouse) OX=10090 GN=Dbt PE=1 SV=2	DBT	18	16	0.0258064	0.12317	0.346443	FALSE	87	81	87	81	0.301946
Q9WV89	Q9WV89	>sp|Q9WV89|STXB4_MOUSE Syntaxin-binding protein 4 OS=Mus musculus (Mouse) OX=10090 GN=Stxbp4 PE=1 SV=1	STXBP4	5	2	-1.56848e-18	1	1	FALSE	13	21	13	21	-2.28039
Q5SQF8	Q5SQF8	>sp|Q5SQF8|SP30L_MOUSE Histone deacetylase complex subunit SAP30L OS=Mus musculus (Mouse) OX=10090 GN=Sap30l PE=1 SV=1	SAP30L	1	1	0.126016	0.0618535	0.205155	FALSE	5	5	5	5	-0.046026
Q9D6J3	Q9D6J3	>sp|Q9D6J3|YJU2_MOUSE Splicing factor YJU2 OS=Mus musculus (Mouse) OX=10090 GN=Yju2 PE=1 SV=1	YJU2	1	1	0.0136979	0.639948	1	FALSE	5	4	5	4	0.854505
Q5SYH2	Q5SYH2	>sp|Q5SYH2|TM199_MOUSE Transmembrane protein 199 OS=Mus musculus (Mouse) OX=10090 GN=Tmem199 PE=1 SV=1	TMEM199	1	1	0	1	1	FALSE	5	4	5	4	0.854505
P42567	P42567	>sp|P42567|EPS15_MOUSE Epidermal growth factor receptor substrate 15 OS=Mus musculus (Mouse) OX=10090 GN=Eps15 PE=1 SV=1	EPS15	13	13	-0.0942584	0.00230813	0.0151984	FALSE	64	64	64	64	-0.0436884
Q9Z275	Q9Z275	>sp|Q9Z275|RLBP1_MOUSE Retinaldehyde-binding protein 1 OS=Mus musculus (Mouse) OX=10090 GN=Rlbp1 PE=1 SV=3	RLBP1	2	2	1.7155e-16	1	1	FALSE	10	10	10	10	-0.0450912
Q9JMA1	Q9JMA1	>sp|Q9JMA1|UBP14_MOUSE Ubiquitin carboxyl-terminal hydrolase 14 OS=Mus musculus (Mouse) OX=10090 GN=Usp14 PE=1 SV=3	USP14	17	15	-0.138165	1.98096e-09	1.00659e-07	FALSE	76	76	76	76	-0.0442907
Q9Z1A1	Q9Z1A1	>tr|Q9Z1A1|Q9Z1A1_MOUSE PB1 domain-containing protein OS=Mus musculus (Mouse) OX=10090 GN=Tfg PE=1 SV=1	TFG	7	7	-0.00564077	0.67986	1	FALSE	34	35	34	35	-0.18345
Q9D6Z1	Q9D6Z1	>sp|Q9D6Z1|NOP56_MOUSE Nucleolar protein 56 OS=Mus musculus (Mouse) OX=10090 GN=Nop56 PE=1 SV=2	NOP56	21	17	0.0364045	0.177609	0.451396	FALSE	98	93	98	93	0.212186
Q9DBR7	Q9DBR7	>sp|Q9DBR7|MYPT1_MOUSE Protein phosphatase 1 regulatory subunit 12A OS=Mus musculus (Mouse) OX=10090 GN=Ppp1r12a PE=1 SV=2	PPP1R12A	18	14	-0.00465435	0.656964	1	FALSE	85	79	85	79	0.312297
Q8R0G7	Q8R0G7	>sp|Q8R0G7|SPNS1_MOUSE Protein spinster homolog 1 OS=Mus musculus (Mouse) OX=10090 GN=Spns1 PE=2 SV=1	SPNS1	2	2	2.15347e-18	1	1	FALSE	9	8	9	8	0.472279
Q9CQN1	Q9CQN1	>sp|Q9CQN1|TRAP1_MOUSE Heat shock protein 75 kDa, mitochondrial OS=Mus musculus (Mouse) OX=10090 GN=Trap1 PE=1 SV=1	TRAP1	18	15	0.114925	1.78716e-07	5.08273e-06	FALSE	85	82	85	82	0.131571
P11627	P11627	>sp|P11627|L1CAM_MOUSE Neural cell adhesion molecule L1 OS=Mus musculus (Mouse) OX=10090 GN=L1cam PE=1 SV=1	L1CAM	27	22	1.35484e-16	1	1	FALSE	133	123	133	123	0.340048
Q8C0T5	Q8C0T5	>sp|Q8C0T5|SI1L1_MOUSE Signal-induced proliferation-associated 1-like protein 1 OS=Mus musculus (Mouse) OX=10090 GN=Sipa1l1 PE=1 SV=2	SIPA1L1	28	21	-0.214196	8.14847e-10	4.50055e-08	FALSE	119	129	119	129	-0.438327
Q6ZQK5	Q6ZQK5	>sp|Q6ZQK5|ACAP2_MOUSE Arf-GAP with coiled-coil, ANK repeat and PH domain-containing protein 2 OS=Mus musculus (Mouse) OX=10090 GN=Acap2 PE=1 SV=2	ACAP2	10	8	-0.083224	0.00141418	0.0101976	FALSE	44	45	44	45	-0.151957
Q61550	Q61550	>sp|Q61550|RAD21_MOUSE Double-strand-break repair protein rad21 homolog OS=Mus musculus (Mouse) OX=10090 GN=Rad21 PE=1 SV=3	RAD21	6	4	-1.50106e-18	1	1	FALSE	26	27	26	27	-0.223176
Q923D5	Q923D5	>sp|Q923D5|WBP11_MOUSE WW domain-binding protein 11 OS=Mus musculus (Mouse) OX=10090 GN=Wbp11 PE=1 SV=2	WBP11	7	6	0.101378	0.00875083	0.0442887	FALSE	34	31	34	31	0.400156
P34152	P34152	>sp|P34152|FAK1_MOUSE Focal adhesion kinase 1 OS=Mus musculus (Mouse) OX=10090 GN=Ptk2 PE=1 SV=4	PTK2	12	11	0	1	1	FALSE	59	58	59	58	0.0392959
Q91WG2	Q91WG2	>sp|Q91WG2|RABE2_MOUSE Rab GTPase-binding effector protein 2 OS=Mus musculus (Mouse) OX=10090 GN=Rabep2 PE=1 SV=3	RABEP2	3	2	-4.91935e-16	1	1	FALSE	13	13	13	13	-0.0417586
Q9D9V7	Q9D9V7	>sp|Q9D9V7|DEN6B_MOUSE Protein DENND6B OS=Mus musculus (Mouse) OX=10090 GN=Dennd6b PE=2 SV=3	DENND6B	1	1	0	1	1	FALSE	4	4	4	4	-0.0536203
Q9QWR8	Q9QWR8	>sp|Q9QWR8|NAGAB_MOUSE Alpha-N-acetylgalactosaminidase OS=Mus musculus (Mouse) OX=10090 GN=Naga PE=1 SV=2	NAGA	9	8	-0.125637	0.0117036	0.0558929	FALSE	40	42	40	42	-0.278975
D3YUJ3	D3YUJ3	>tr|D3YUJ3|D3YUJ3_MOUSE CYCLIN domain-containing protein OS=Mus musculus (Mouse) OX=10090 GN=Ccnyl1 PE=1 SV=1	CCNYL1	2	2	-0.0201985	0.660273	1	FALSE	10	10	10	10	-0.0450912
Q9R1T2	Q9R1T2	>sp|Q9R1T2|SAE1_MOUSE SUMO-activating enzyme subunit 1 OS=Mus musculus (Mouse) OX=10090 GN=Sae1 PE=1 SV=1	SAE1	14	12	0.0328744	0.14652	0.392843	FALSE	65	62	65	62	0.183563
O35344	O35344	>sp|O35344|IMA4_MOUSE Importin subunit alpha-4 OS=Mus musculus (Mouse) OX=10090 GN=Kpna3 PE=1 SV=1	KPNA3	7	7	2.54796e-19	1	1	FALSE	33	33	33	33	-0.044344
Q99JT9	Q99JT9	>sp|Q99JT9|MTND_MOUSE 1,2-dihydroxy-3-keto-5-methylthiopentene dioxygenase OS=Mus musculus (Mouse) OX=10090 GN=Adi1 PE=1 SV=1	ADI1	4	4	-0.0169827	0.559918	1	FALSE	20	20	20	20	-0.0445575
Q9R1P4	Q9R1P4	>sp|Q9R1P4|PSA1_MOUSE Proteasome subunit alpha type-1 OS=Mus musculus (Mouse) OX=10090 GN=Psma1 PE=1 SV=1	PSMA1	11	9	-0.027468	0.222583	0.533119	FALSE	51	51	51	51	-0.0443582
Q3TRM4	Q3TRM4	>sp|Q3TRM4|PLPL6_MOUSE Neuropathy target esterase OS=Mus musculus (Mouse) OX=10090 GN=Pnpla6 PE=1 SV=2	PNPLA6	7	7	-0.0176941	0.314668	0.686177	FALSE	34	35	34	35	-0.18345
O35609	O35609	>sp|O35609|SCAM3_MOUSE Secretory carrier-associated membrane protein 3 OS=Mus musculus (Mouse) OX=10090 GN=Scamp3 PE=1 SV=3	SCAMP3	5	5	-4.25022e-17	1	1	FALSE	25	24	25	24	0.150505
Q8K021	Q8K021	>sp|Q8K021|SCAM1_MOUSE Secretory carrier-associated membrane protein 1 OS=Mus musculus (Mouse) OX=10090 GN=Scamp1 PE=1 SV=1	SCAMP1	9	9	-3.27701e-19	1	1	FALSE	45	43	45	43	0.174923
Q9JJG0	Q9JJG0	>sp|Q9JJG0|TACC2_MOUSE Transforming acidic coiled-coil-containing protein 2 OS=Mus musculus (Mouse) OX=10090 GN=Tacc2 PE=1 SV=2	TACC2	5	3	0.0837967	0.00872068	0.0441655	FALSE	21	17	21	17	0.9431
Q9JHS4	Q9JHS4	>sp|Q9JHS4|CLPX_MOUSE ATP-dependent Clp protease ATP-binding subunit clpX-like, mitochondrial OS=Mus musculus (Mouse) OX=10090 GN=Clpx PE=1 SV=2	CLPX	14	14	0.0351415	0.133345	0.367598	FALSE	68	70	68	70	-0.184443
A2AHG0	A2AHG0	>sp|A2AHG0|LZTS3_MOUSE Leucine zipper putative tumor suppressor 3 OS=Mus musculus (Mouse) OX=10090 GN=Lzts3 PE=1 SV=1	LZTS3	2	2	-4.70429e-16	1	1	FALSE	8	9	8	9	-0.567286
Q80Y84	Q80Y84	>sp|Q80Y84|KDM5B_MOUSE Lysine-specific demethylase 5B OS=Mus musculus (Mouse) OX=10090 GN=Kdm5b PE=1 SV=1	KDM5B	4	2	-2.01275e-16	1	1	FALSE	16	16	16	16	-0.0396839
Q8VHG2	Q8VHG2	>sp|Q8VHG2|AMOT_MOUSE Angiomotin OS=Mus musculus (Mouse) OX=10090 GN=Amot PE=1 SV=3	AMOT	4	2	-0.10366	0.0619482	0.20538	FALSE	16	19	16	19	-0.841263
O70585	O70585	>sp|O70585|DTNB_MOUSE Dystrobrevin beta OS=Mus musculus (Mouse) OX=10090 GN=Dtnb PE=1 SV=3	DTNB	5	3	1.88664e-15	1	1	FALSE	22	21	22	21	0.176855
Q8C4X2	Q8C4X2	>sp|Q8C4X2|KC1G3_MOUSE Casein kinase I isoform gamma-3 OS=Mus musculus (Mouse) OX=10090 GN=Csnk1g3 PE=1 SV=2	CSNK1G3	2	2	-3.08001e-19	1	1	FALSE	10	9	10	9	0.428883
Q9D3D9	Q9D3D9	>sp|Q9D3D9|ATPD_MOUSE ATP synthase subunit delta, mitochondrial OS=Mus musculus (Mouse) OX=10090 GN=Atp5f1d PE=1 SV=1	ATP5F1D	4	2	0.144029	0.351543	0.747825	FALSE	17	15	17	15	0.541635
Q8BX02	Q8BX02	>sp|Q8BX02|KANK2_MOUSE KN motif and ankyrin repeat domain-containing protein 2 OS=Mus musculus (Mouse) OX=10090 GN=Kank2 PE=1 SV=1	KANK2	8	7	-0.00863857	0.776549	1	FALSE	37	38	37	38	-0.173356
[truncated: 6,504 more rows]
