# Supplementary material for: Tomosyn affects dense core vesicle composition but not exocytosis in mammalian neurons
Source: eLife. 2023 Sep 11;12:e85561. doi: 10.7554/eLife.85561 (PMC10495110; doi:10.7554/eLife.85561)
Supplement: Supplementary file 1. [file elife-85561-supp1.xlsx]

## Sheet: Sheet1
Functional characterization of mitochondrial proteins increased in DKO neurons
(performed using MitoCarta3.0, PMID 33174596)
Protein	FC log2	MitoPathway
Uqcr10	1.20415	OXPHOS* > Complex III > CIII subunits
Cox6b1	1.13586	OXPHOS > Complex IV > CIV subunits
Cox6c	1.06742	OXPHOS > Complex IV > CIV subunits
Ndufa2	0.980286	OXPHOS > Complex I > CI subunits
Ndufa4	1.03655	OXPHOS > Complex IV > CIV subunits
Atp5mpl	0.964374	OXPHOS > Complex V > CV subunits
Atp5mf	0.892032	OXPHOS > Complex V > CV subunits
Ndufa3	0.721288	OXPHOS > Complex I > CI subunits
Mpc1	0.692987	Metabolism > Carbohydrate metabolism > Gluconeogenesis/ Pyruvate metabolism
Uqcrh	0.644814	OXPHOS > Complex III > CIII subunits
Cox7a2	0.598695	OXPHOS > Complex IV > CIV subunits
Timm9	0.583819	Protein import, sorting and homeostasis > Protein import and sorting/ Chaperones
Cox7c	0.53569	OXPHOS > Complex IV > CIV subunits
Timm10	0.522924	Protein import, sorting and homeostasis > Protein import and sorting/ Chaperones
Mrps21	0.515504	Mitochondrial central dogma > Translation > Mitochondrial ribosome
Ckmt1	0.4972	Metabolism > Nucleotide metabolism > Creatine metabolism
Ndufc2	0.478354	OXPHOS > Complex I > CI subunits
Atp5l	0.433141	OXPHOS > Complex V > CV subunits
Ndufb3	0.403159	OXPHOS > Complex I > CI subunits
Cox5a	0.397672	OXPHOS > Complex IV > CIV subunits
Micos13	0.392229	Mitochondrial dynamics and surveillance > Cristae formation
Dnajc19	0.383008	Protein import, sorting and homeostasis > Protein import and sorting/ Import Motor
Mtfp1	0.354289	Mitochondrial dynamics and surveillance > Fusion
Atp5md	0.353316	OXPHOS > Complex V > CV subunits
Cox7a2l	0.336546	OXPHOS > Complex IV > CIV subunits
Ndufa11	0.336093	OXPHOS > Complex I > CI subunits
Ndufb11	0.324845	OXPHOS > Complex I > CI subunits
Ndufs5	0.324154	OXPHOS > Complex I > CI subunits
Ndufa5	0.318037	OXPHOS > Complex I > CI subunits
Ndufv2	0.312104	OXPHOS > Complex I > CI subunits
Cox5b	0.309879	OXPHOS > Complex IV > CIV subunits
Them4	0.30014	Metabolism > Lipid metabolism
* OXPHOS: oxidative phosphorylation
