# Supplementary figures and images for: Tomosyn affects dense core vesicle composition but not exocytosis in mammalian neurons
Source: eLife journal article supplement (doi:10.7554/elife.85561), 2023-08-29

**Culture #1**

Syntaxin 1

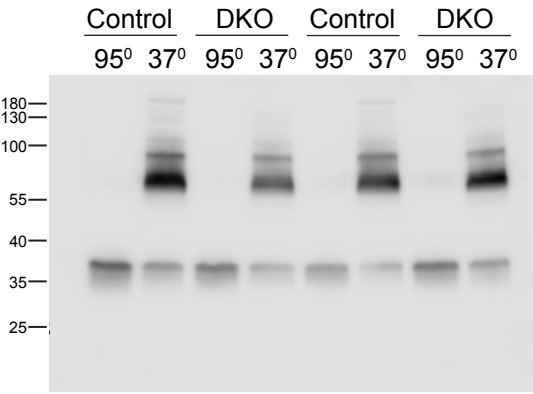

**Culture #2**

Syntaxin 1

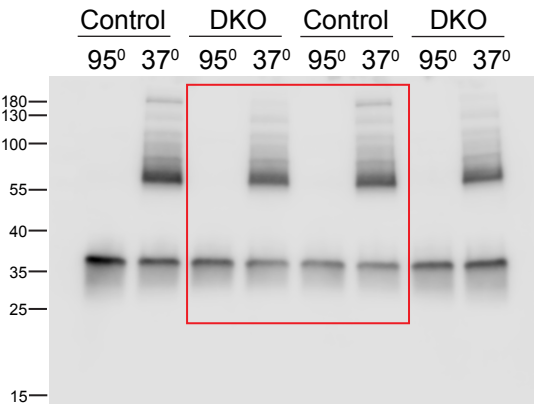

Tomosyn (STXBP5)

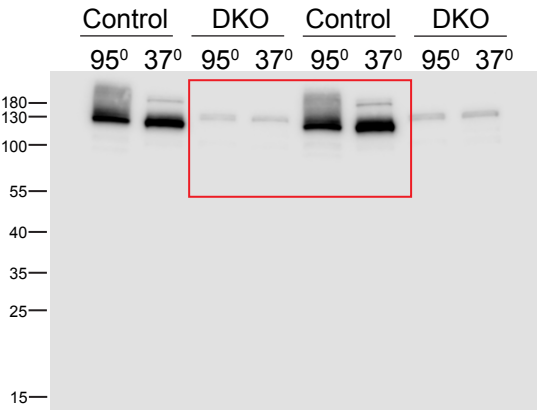

**Cultures #3 and #4**

Syntaxin 1

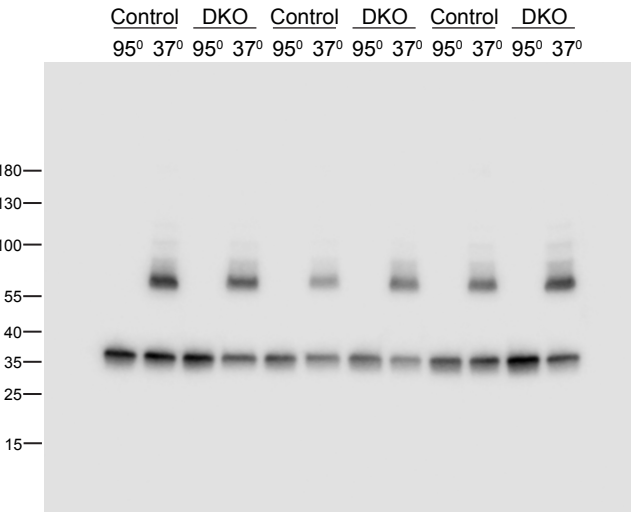

Supplement: fig1-data1 [file elife-85561-fig1-data1-v1.zip]

Tomosyn (STXBP5)

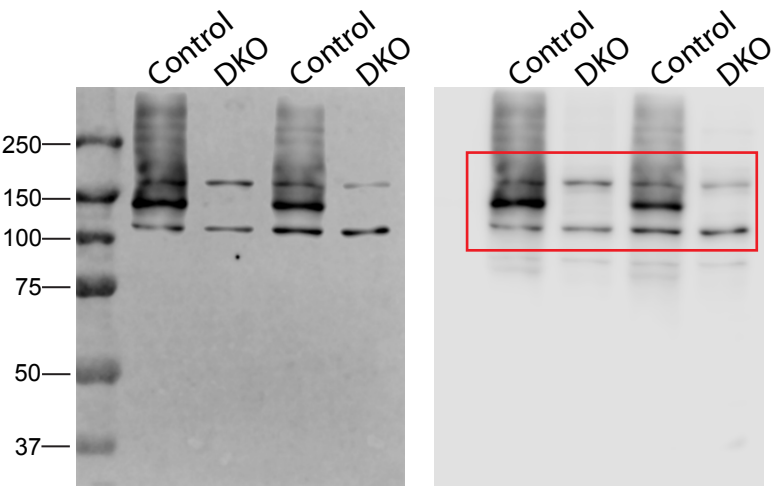

Tomosyn-2 (STXBP5L)

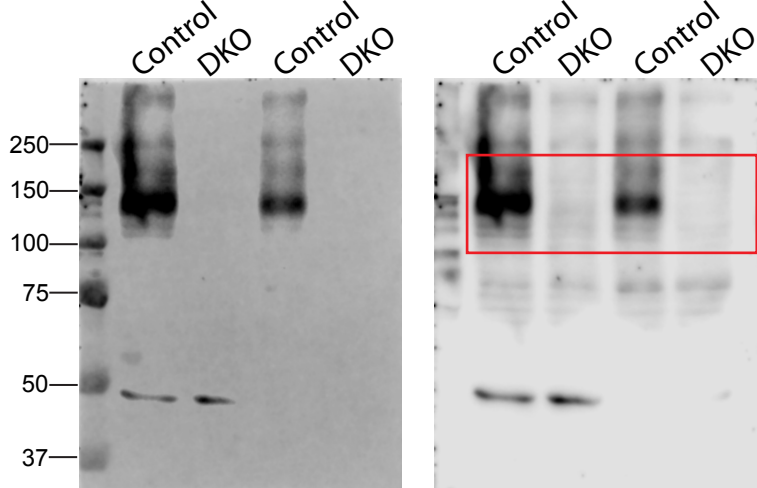

Tubulin (membrane was cut to detect other proteins)

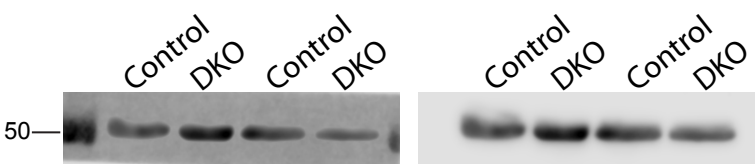

Supplement: fig1-figsupp1-data1 [file elife-85561-fig1-figsupp1-data1-v1.zip]

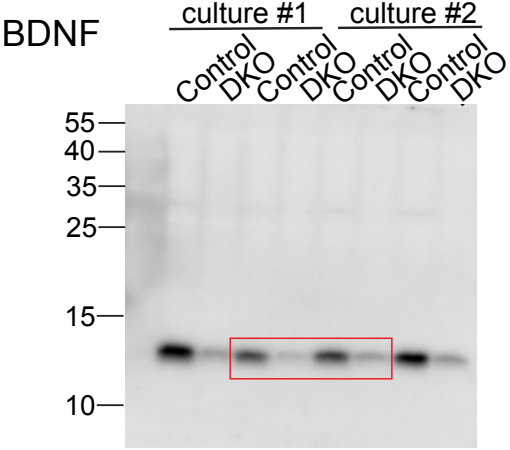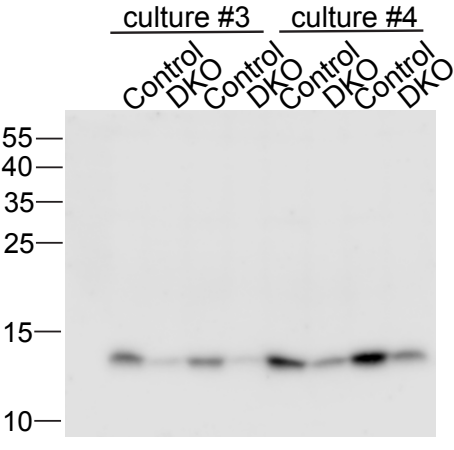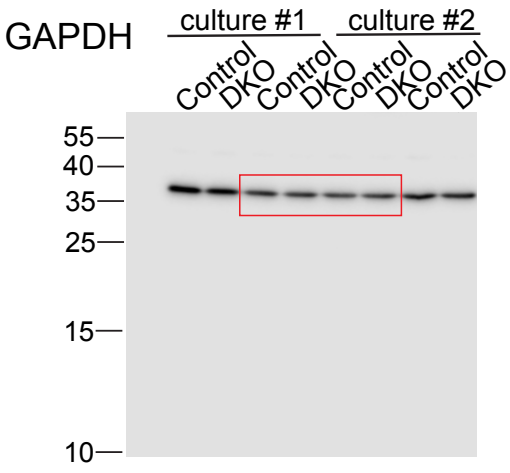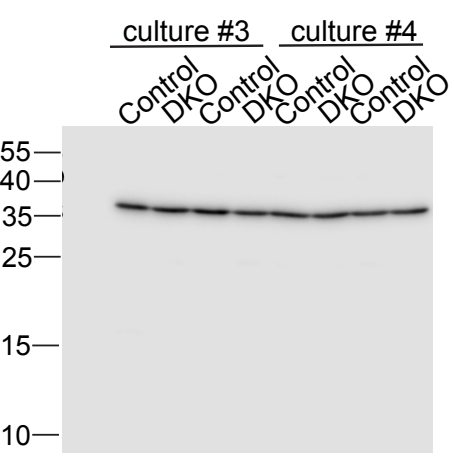

Supplement: fig2-data1 [file elife-85561-fig2-data1-v1.zip]

## BDNF

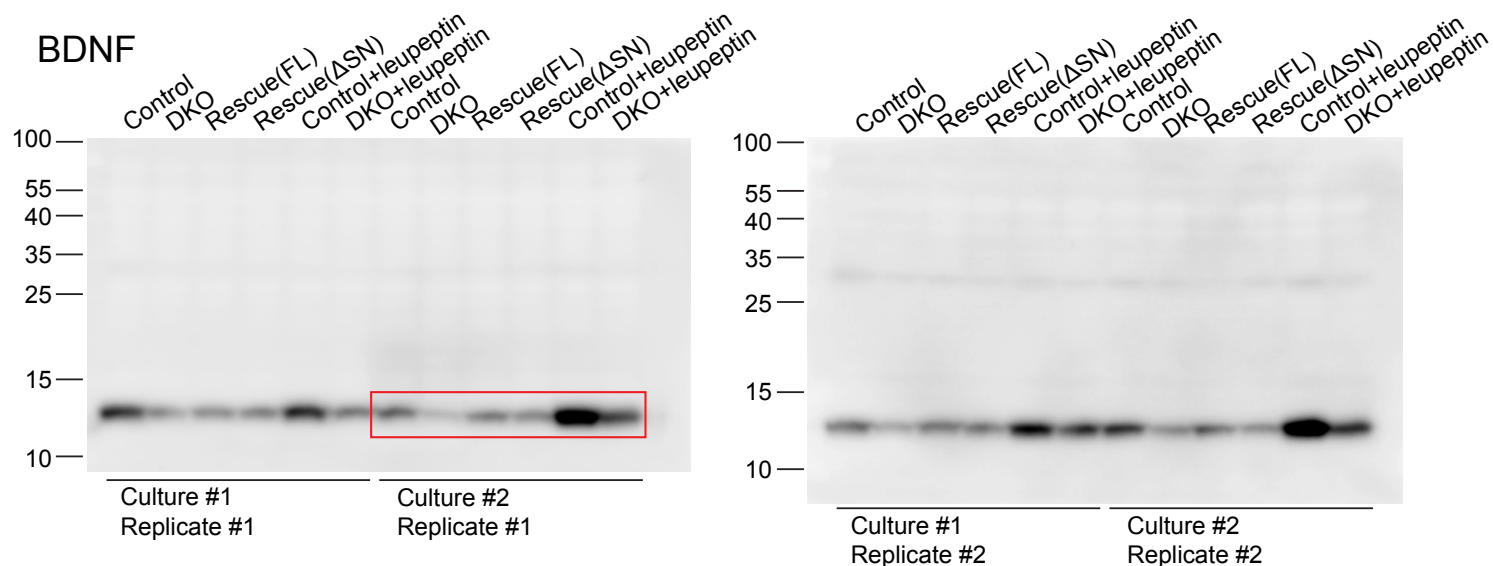

## Tomosyn (STXBP5)

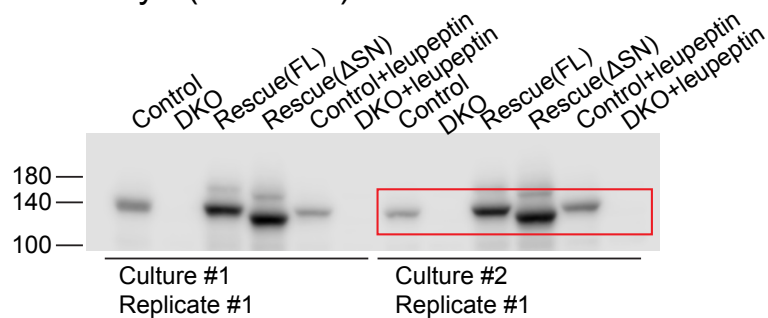

## GAPDH

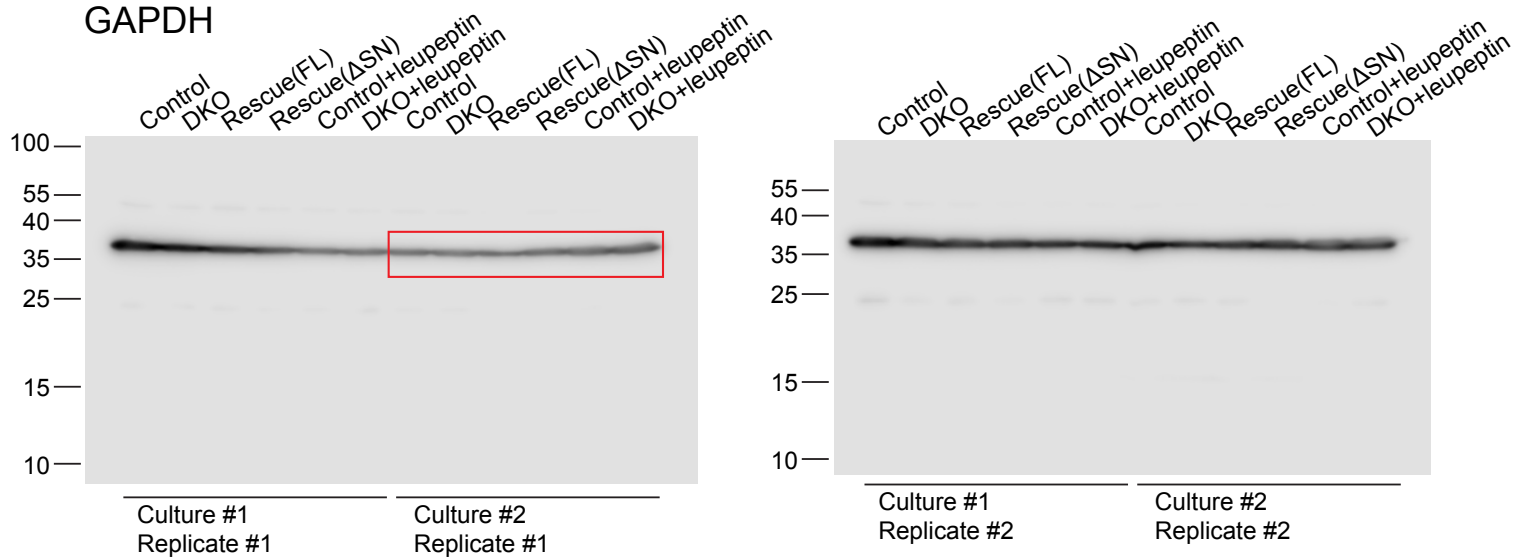

Supplement: fig2-data1 [file elife-85561-fig2-data1-v1.zip]

IA-2 (PTPRN)

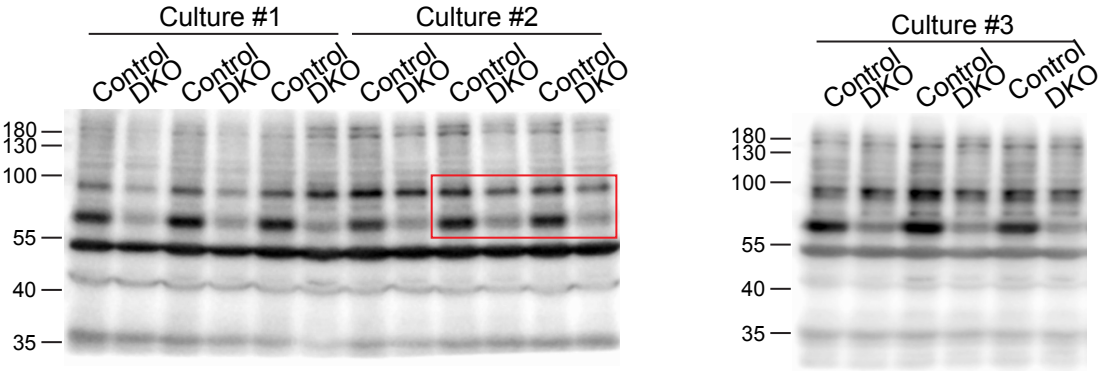

Total protein stain

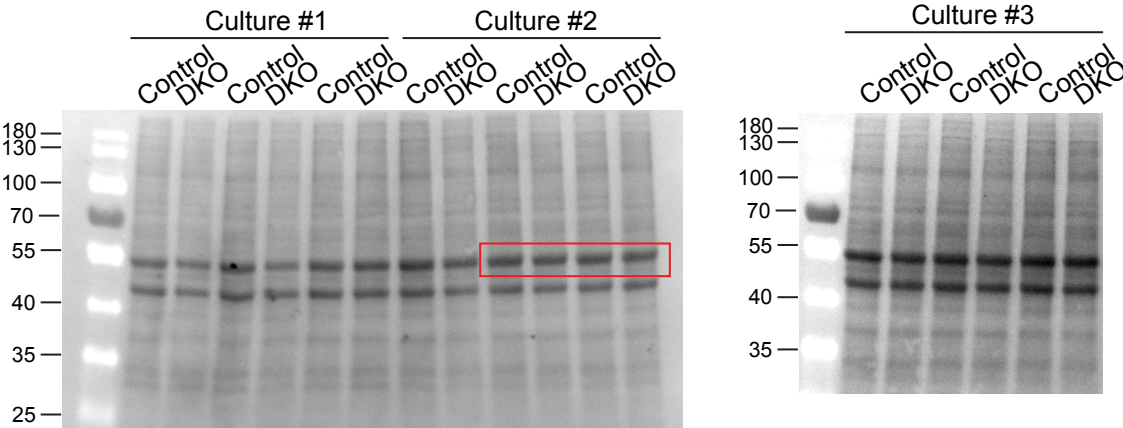

Actin

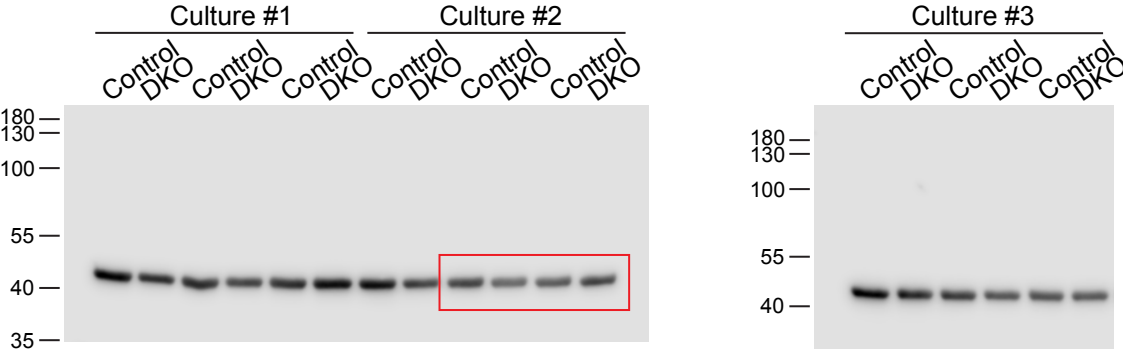

Supplement: fig2-figsupp2-data1 [file elife-85561-fig2-figsupp2-data1-v1.zip]

## LAMP1

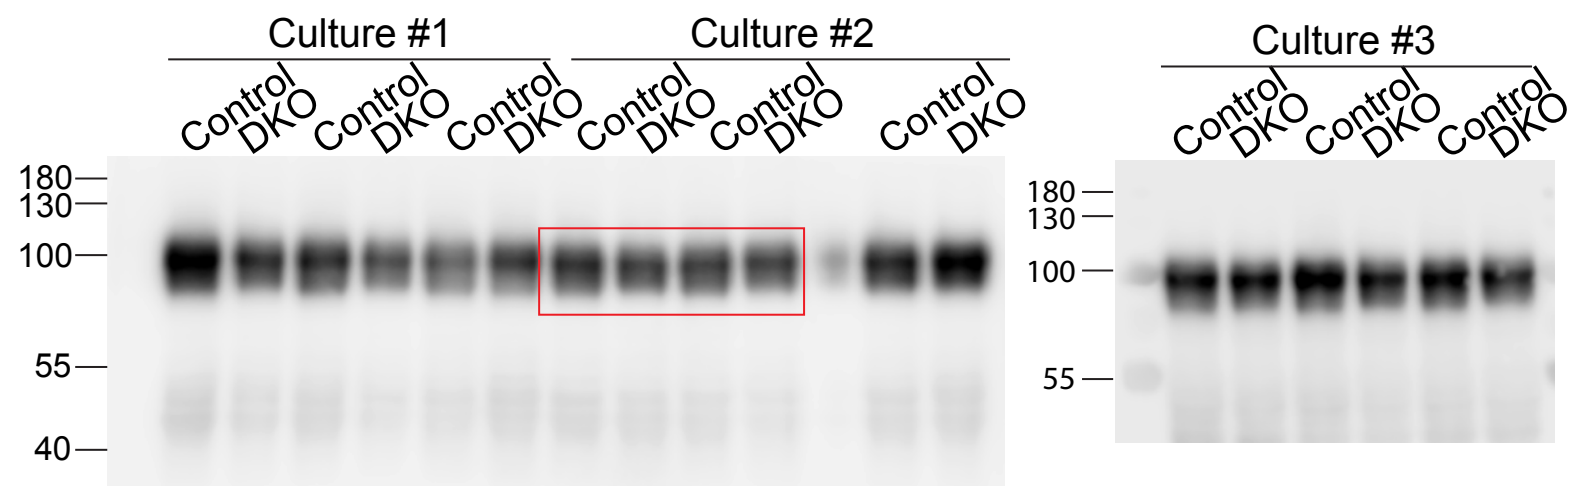

## LIMP2

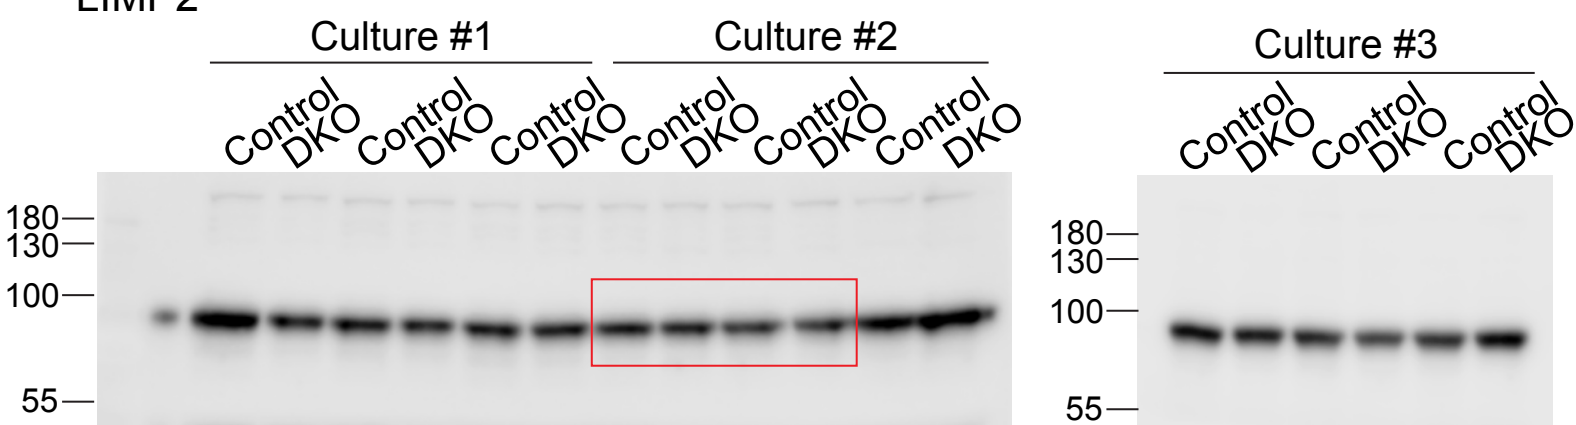

## Actin

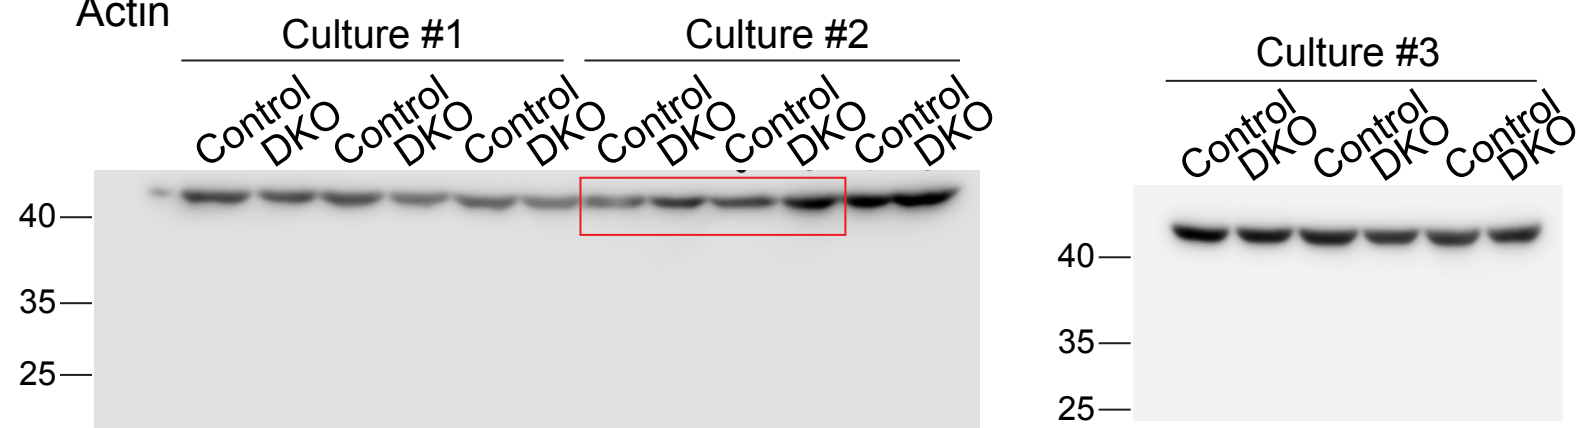

Supplement: fig2-figsupp3-data1 [file elife-85561-fig2-figsupp3-data1-v1.zip]

BDNF

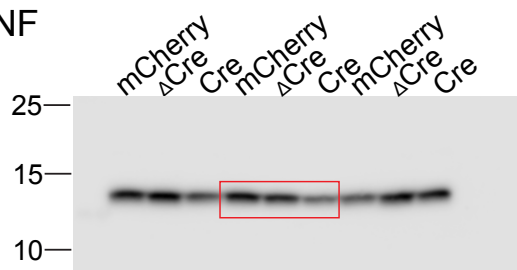

actin

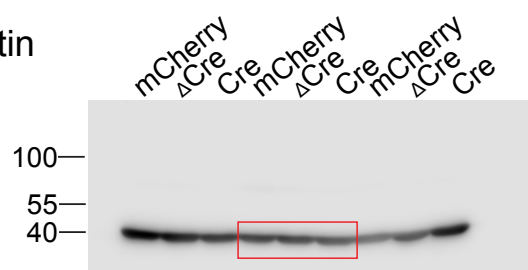

tomosyn

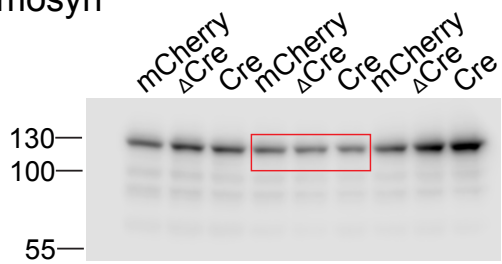

Supplement: fig6-data1 [file elife-85561-fig6-data1-v1.zip]
